# Supplementary material for: Non-visual light modulates behavioral memory and gene expression in C. elegans
Source: bioRxiv preprint, doi:10.1101/2025.01.27.634647, version 3 (2025-12-01)
Supplement: Supplementary Table S1 [file 634647_file02.xlsx]

## Sheet: LT_vs_WT
Locus ID	Symbol	log2FoldChange	padj	WT1	WT2	WT3	WT4	LT1	LT2	LT3	LT4
CELE_ZK6.10	dod-19	2.75041	1.46426e-301	922.422	990.201	927.578	987.101	6160.41	6183.35	6702.62	6712.45
CELE_F55G11.4	F55G11.4	4.7462	1.14726e-212	275.452	335.583	270.503	318.331	9681.12	9396.79	6674.99	6462.54
CELE_F35E12.7	dct-17	4.47039	6.83277e-199	44.1116	37.6957	38.3622	55.0428	978.156	965.439	964.65	981.557
CELE_C32H11.12	dod-24	2.78879	4.22103e-151	759.7	789.77	759.375	898.115	6056.7	5925.76	5042.1	5141.74
CELE_F55G11.8	F55G11.8	1.87719	1.29484e-110	242.124	232.61	210.5	231.18	860.253	887.511	791.48	828.422
CELE_F08G5.6	irg-4	3.25988	1.53806e-107	1526.26	1230.17	1691.87	1210.94	15968.2	15122.3	11692.7	11419.2
CELE_C17G10.5	lys-8	1.35025	9.18002e-98	3878.88	4118.94	3755.56	4199.77	10582.9	10441.2	9768.67	9884.7
CELE_Y38E10A.14	Y38E10A.14	4.00604	1.10464e-89	277.413	168.251	226.239	138.524	3642.97	3699.4	2772.84	2893.63
CELE_C14C6.5	C14C6.5	2.96504	2.02474e-89	1499.79	1471.05	1555.14	1376.99	13919.1	13664.4	9230.04	9278.54
CELE_Y37H2A.14	Y37H2A.14	4.10123	6.81156e-88	20.5854	15.6299	17.7056	21.0997	305.674	303.052	355.9	322.223
CELE_R01E6.3	cah-4	1.30017	3.00783e-85	2484.95	2589.05	2512.23	2400.78	6501.02	6547.02	5858.02	5688.35
CELE_F52E1.14	F52E1.14	1.07361	2.22105e-82	1847.79	1823.18	1890.57	1791.64	4110.22	4012.2	3757.67	3595.5
CELE_Y38E10A.15	nspe-7	4.54764	6.5492e-77	42.1511	23.9046	30.493	25.6866	893.004	848.547	564.129	545.546
CELE_K12H4.7	K12H4.7	1.38494	7.0335e-76	7026.49	7739.56	7459.97	7453.71	20758.5	20185.5	18019.2	18550.7
CELE_ZK1320.3	ZK1320.3	1.11932	9.25479e-73	1697.81	1665.96	1706.63	1613.67	3521.8	3446.14	3833.1	3717.8
CELE_Y54G2A.6	clec-85	2.40425	7.76752e-72	562.668	536.933	564.613	523.824	3342.76	3283.79	2502.99	2452.3
CELE_F56F10.1	F56F10.1	1.20634	2.68826e-71	1360.6	1290.85	1265.95	1335.71	3030.54	3020.78	2973.63	3096.74
CELE_F55G11.2	F55G11.2	2.82759	8.34527e-71	245.064	202.269	256.732	210.08	1661.55	1829.14	1465.04	1530.29
CELE_T10H4.12	cpr-3	1.78439	1.94526e-65	271.531	317.195	251.813	289.892	955.23	912.404	999.709	1029.41
CELE_F15B9.1	far-3	3.35891	9.77216e-64	103.907	73.5525	88.5282	75.2252	723.791	682.95	1009.27	1080.46
CELE_Y116F11B.3	pcp-4	1.44659	2.57214e-63	355.833	361.327	358.047	333.926	965.055	1011.98	925.341	937.956
CELE_F35E12.5	irg-5	4.24699	2.13289e-62	1274.33	737.364	1328.91	729.317	25078.3	24415.2	13966.2	13807.7
CELE_T04H1.9	tbb-6	2.4186	3.75082e-62	47.0524	44.1315	57.0515	45.869	248.906	254.348	269.847	262.67
CELE_Y41D4B.16	hpo-6	2.95257	5.0101e-61	342.11	220.658	332.472	256.866	2463.95	2421.17	2075.91	1952.48
CELE_F54D5.4	F54D5.4	1.61726	6.19698e-61	1275.31	1061	1134.14	955.91	3343.85	3406.09	3444.27	3381.75
CELE_F13D12.6	ctsa-1.2	1.7002	7.29396e-61	6724.57	6427.57	6073.03	6513.4	22781.4	22477.8	19203.8	19173.9
CELE_C34H4.1	C34H4.1	2.6225	1.40385e-58	47.0524	44.1315	52.1332	48.6211	298.032	286.818	299.594	296.7
CELE_Y40D12A.2	ctsa-4.2	2.15825	2.54079e-52	347.011	262.95	337.391	318.331	1568.76	1566.13	1212.19	1300.59
CELE_F08F3.7	cyp-14A5	2.25687	3.62359e-52	192.13	168.251	199.68	133.02	806.76	767.372	832.913	901.799
CELE_K10C2.3	asp-14	1.3849	1.66011e-51	3875.94	4275.24	3936.55	4690.56	11018.4	10688	11231.6	10882.2
CELE_Y22F5A.5	lys-2	1.96512	3.58296e-51	1308.64	1071.11	1230.54	1110.95	3861.31	3868.25	5292.82	5408.67
CELE_F49F1.7	F49F1.7	3.43838	8.62284e-50	118.611	75.3913	124.923	85.3163	1347.15	1221.95	894.532	913.497
CELE_K11G12.1	nas-11	1.41676	1.38395e-49	553.845	540.611	518.382	521.989	1322.04	1297.71	1530.9	1548.37
CELE_R03D7.6	gst-5	1.73037	2.12615e-49	1146.9	1142.82	987.581	1043.06	3961.75	4002.46	3217.98	3154.17
CELE_K06G5.1	K06G5.1	1.29421	7.75844e-49	3430.9	3487.31	3491.94	3864	8318.69	9010.4	8860.33	8818.07
CELE_F35C5.9	clec-66	1.36279	3.32783e-48	469.543	560.838	505.594	617.397	1418.11	1468.72	1332.24	1322.92
CELE_F19B2.5	F19B2.5	1.34335	3.46926e-48	397.985	416.491	430.837	355.026	968.33	1059.6	1015.64	1015.59
CELE_R10H10.3	R10H10.3	1.13104	3.98768e-48	974.376	1030.65	1033.81	961.414	2205.22	2240.42	2174.71	2140.71
CELE_T26C5.1	gst-13	1.6902	5.08749e-47	521.497	564.516	576.417	559.602	2011.99	2015.3	1606.33	1537.74
CELE_M02F4.7	clec-265	2.25287	1.74208e-46	238.203	208.705	264.601	214.667	997.806	888.593	1219.62	1305.91
CELE_C49C3.9	C49C3.9	1.84961	3.62998e-45	171.545	154.46	174.105	115.59	541.479	539	575.815	559.371
CELE_C15C8.3	hrg-7	2.56116	4.97042e-45	464.642	256.514	437.723	275.214	2207.4	2206.87	2002.6	2040.75
CELE_Y58A7A.3	Y58A7A.3	1.71555	1.63418e-43	189.19	216.98	207.549	209.163	758.726	705.679	573.69	665.715
CELE_H23N18.1	ugt-13	1.10885	2.09256e-43	329.367	389.828	340.342	364.2	746.717	812.83	746.86	766.742
CELE_T10D4.13	ins-19	4.52518	6.88469e-43	18.6249	4.59703	11.8038	3.66952	209.605	187.243	247.537	235.021
CELE_C49C3.4	C49C3.4	0.83527	1.88173e-42	2045.8	2200.14	2031.23	2091.63	3912.62	3902.88	3535.63	3582.74
CELE_H23L24.5	parg-2	4.1608	3.19838e-42	10.7828	6.43585	6.88552	6.42166	124.453	130.962	142.36	145.692
CELE_K10B2.2	ctsa-4.1	1.43133	9.64129e-42	223.499	196.753	210.5	227.51	646.281	577.964	567.316	523.214
CELE_R10D12.9	swt-6	2.1581	1.1456e-41	60.776	44.1315	60.9861	44.0342	235.805	220.795	230.539	246.719
CELE_K08D8.4	K08D8.4	2.27073	4.35641e-41	40.1906	47.8091	33.444	47.7038	184.496	200.231	216.727	216.942
CELE_F28D1.5	thn-2	-1.91979	5.30422e-41	903.797	754.833	835.116	779.773	173.579	186.161	242.225	262.67
CELE_Y32F6A.5	Y32F6A.5	1.04684	1.05252e-40	2616.31	2702.14	2750.27	2555.82	5557.8	5688.73	5454.31	5249.15
CELE_C49C8.5	C49C8.5	1.34481	2.03182e-40	516.596	583.823	518.382	517.402	1312.21	1426.51	1297.18	1390.98
CELE_C52A10.1	cest-32	1.20426	1.24522e-39	285.255	285.016	303.947	247.693	608.072	656.974	650.182	667.842
CELE_R08E3.1	R08E3.1	0.994331	1.98655e-39	1767.4	1984.08	1820.73	1943.01	4044.72	3944.01	3387.96	3597.63
CELE_K08B4.3	ugt-19	2.06934	6.61967e-39	106.848	70.7943	93.4464	66.9687	387.55	348.51	326.154	353.063
CELE_K10D11.5	K10D11.5	1.58253	6.77099e-39	117.631	111.248	102.299	114.673	370.083	338.769	294.282	332.858
CELE_B0024.4	B0024.4	3.05928	1.47969e-37	47.0524	76.3107	52.1332	77.9773	423.576	465.402	633.184	594.464
CELE_F14F9.4	F14F9.4	1.74863	1.88853e-37	85.2824	94.6989	90.4954	87.1511	311.132	317.123	252.849	321.16
CELE_F54E2.1	F54E2.1	2.28823	2.15374e-37	453.859	298.807	481.003	284.388	1651.73	1624.58	2065.29	2068.4
CELE_C05A9.1	pgp-5	1.96746	3.43496e-37	79.4009	60.6808	103.283	74.3078	323.141	298.723	311.28	306.271
CELE_T21H3.1	T21H3.1	1.07457	3.64972e-37	13228.6	15059	13035.3	15041.4	31072.8	30752.3	28017.3	28869.3
CELE_R06B10.3	clec-150	1.21338	3.84277e-37	3147.61	2989.91	3045.37	2795.26	7622.19	7765.72	5932.38	6454.03
CELE_F35E12.6	F35E12.6	1.87411	1.02969e-36	764.601	553.483	790.852	562.354	2332.94	2316.19	2530.61	2608.62
CELE_K11D12.5	swt-7	1.02374	1.2278e-36	970.455	845.854	931.513	816.468	1805.66	1803.16	1782.69	1852.52
CELE_K08D8.6	K08D8.6	2.07913	1.82856e-36	821.456	559.919	802.655	564.189	3340.58	3262.14	2497.68	2508.66
CELE_C02A12.4	lys-7	1.49676	7.23802e-36	4122.96	4919.74	4099.84	5050.18	11597	11257.3	14296.6	14192.7
CELE_T07C4.5	ttr-15	0.903158	8.45783e-36	4716.02	4169.51	4656.58	4323.61	8061.05	7668.31	9011.19	8668.12
CELE_F35C5.8	clec-65	1.24899	9.15045e-36	1778.19	1931.67	1635.8	1998.05	4605.85	4766.58	4098.7	3985.78
CELE_T08H10.1	exc-15	0.690263	9.57858e-36	2232.05	2180.83	2133.53	2099.88	3472.67	3418	3504.82	3555.09
CELE_F08C6.6	apy-1	0.77246	1.14711e-35	1991.88	1790.08	1957.46	1703.57	3182.28	3201.53	3190.36	3136.09
CELE_B0365.6	clec-41	2.91296	1.16362e-35	1181.21	654.617	1244.31	695.374	7553.41	7351.19	6737.67	6787.95
CELE_F19C7.1	nspg-10	1.22315	1.61403e-35	3690.67	3547.99	3864.75	3647.5	8829.6	8525.52	8537.36	8543.7
CELE_R08F11.1	R08F11.1	0.779637	1.92995e-35	712.647	739.203	722.98	751.334	1237.98	1257.67	1276.99	1251.67
CELE_F53B6.9	fip-6	2.79423	9.12111e-35	28.4275	48.7285	29.5094	34.8604	237.989	251.101	246.474	248.846
CELE_B0213.17	nlp-34	3.16651	1.2459e-34	46.0721	77.2301	40.3295	66.0514	441.043	418.862	601.312	605.099
CELE_Y34B4A.6	nspg-14	1.45087	4.79614e-34	2356.54	2149.57	2283.04	2290.7	6490.11	6114.08	6149.11	6068
CELE_R07B1.10	lec-8	0.864418	6.00785e-34	3129.96	3132.42	3146.68	3253.03	5969.37	5612.96	5826.14	5644.75
CELE_F53C11.1	F53C11.1	1.3231	1.05387e-33	151.94	144.347	173.122	162.376	398.467	388.557	387.772	405.172
CELE_K07A1.6	K07A1.6	0.90312	2.82985e-33	303.88	321.792	324.603	318.331	568.771	589.87	614.061	599.782
CELE_ZC443.6	ugt-16	1.54922	3.94565e-33	159.782	201.35	144.596	210.08	495.628	510.86	546.068	545.546
CELE_Y68A4A.13	Y68A4A.13	3.28131	2.26218e-32	14.7039	38.6151	10.8201	34.8604	236.897	251.101	252.849	228.64
CELE_F52E1.7	hsp-17	1.21418	2.37848e-32	264.67	246.401	236.075	252.28	593.88	585.541	580.065	559.371
CELE_F01D5.5	F01D5.5	2.04897	3.58057e-32	164.683	182.962	124.923	202.741	779.468	737.067	655.494	625.304
CELE_Y94H6A.10	Y94H6A.10	1.30914	8.82891e-32	438.175	422.008	401.328	379.795	936.671	896.169	1127.2	1105.98
CELE_C17H12.6	C17H12.6	3.44864	1.21466e-31	19.6051	20.2269	20.6566	11.9259	246.722	195.902	154.046	192.483
CELE_Y46D2A.2	Y46D2A.2	1.95406	5.23723e-31	115.67	70.7943	105.25	70.6383	377.725	364.745	309.155	348.809
CELE_K01D12.11	cdr-4	1.73353	5.35886e-31	379.36	257.434	330.505	252.28	1027.28	1072.59	1008.21	944.337
CELE_C39E9.8	C39E9.8	1.16405	6.20551e-31	800.87	880.791	926.595	840.32	1647.36	1822.64	2067.41	2189.63
CELE_T26C12.6	clec-173	1.83741	7.83699e-31	251.926	217.899	268.535	189.898	883.178	888.593	793.605	749.727
CELE_F40F4.6	irg-7	1.39997	8.26177e-31	7630.32	7665.09	7931.14	7692.23	21329.5	20466.9	19682.9	20114
CELE_W01A11.4	lec-10	1.12146	1.44215e-30	2394.77	2223.12	2324.36	2117.31	4951.91	4783.9	4960.3	5013.07
CELE_E01G4.6	E01G4.6	2.01898	3.08267e-30	431.313	356.73	401.328	366.952	1278.37	1256.59	1934.61	1836.57
CELE_F35E12.8	cld-9	1.5227	3.23203e-30	117.631	147.105	98.3646	122.929	362.442	358.251	310.218	367.951
CELE_F56C9.7	nspg-6	1.19154	3.25372e-30	1407.65	1423.24	1392.84	1282.5	3117.87	3187.46	3121.3	3148.85
CELE_F56D5.3	F56D5.3	1.89936	6.66514e-30	38.23	51.4868	54.1005	48.6211	199.78	186.161	155.109	177.595
CELE_Y49C4A.8	ugt-29	1.33255	1.27969e-29	269.571	242.723	269.519	218.336	628.814	544.412	692.678	650.827
CELE_ZK1058.6	nit-1	1.72599	1.35267e-29	150.96	179.284	131.809	200.906	551.304	548.741	568.378	527.468
CELE_C29F3.7	C29F3.7	1.62064	6.85839e-29	1052.8	1247.63	1076.11	1275.16	4169.17	4175.63	3019.31	2942.55
CELE_K06A4.7	K06A4.7	1.25462	4.84009e-28	946.929	1138.23	1176.44	1280.66	2721.59	2769.68	2806.83	2541.63
CELE_C17H12.8	C17H12.8	1.7192	1.09632e-27	403.866	493.721	418.05	518.32	1248.89	1210.05	1827.31	1753.62
CELE_M28.10	M28.10	0.76483	1.68132e-27	1004.76	1038.93	941.349	1089.85	1744.52	1712.25	1739.13	1730.22
CELE_C10F3.7	C10F3.7	-3.92797	2.16959e-27	344.07	783.334	320.669	719.226	16.3754	25.9759	52.0571	47.8549
CELE_Y40B10A.2	comt-3	1.05271	2.53506e-27	287.215	246.401	268.535	241.271	505.453	521.683	594.938	540.229
CELE_C34H4.2	C34H4.2	1.33311	2.81745e-27	282.314	394.425	262.634	333.009	837.327	785.772	781.919	803.963
CELE_C18D11.6	C18D11.6	3.37722	4.64494e-27	8.82232	17.4687	7.86917	19.265	135.37	102.821	159.358	161.643
CELE_K10H10.2	cysl-2	1.71327	9.0718e-27	1569.39	1314.75	1504.98	1289.84	5401.69	5162.72	3987.15	4068.73
CELE_Y39D8C.1	abt-4	0.963165	1.10063e-26	666.575	675.764	629.534	680.696	1417.02	1387.55	1125.07	1243.16
CELE_C35B1.5	C35B1.5	1.2798	1.98474e-26	1346.87	997.556	1300.38	1027.47	2963.94	3073.82	2729.28	2574.59
CELE_C34B7.3	cyp-36A1	1.87883	2.45236e-26	164.683	103.893	143.612	99.077	489.078	536.836	428.143	423.25
CELE_F45D11.1	F45D11.1	-3.45284	3.47679e-26	99.9863	165.493	106.234	191.732	9.82522	5.41165	14.8735	21.2689
CELE_T18H9.2	asp-2	0.917069	3.7973e-26	10567.2	9716.29	11086.7	9831.56	20034.7	19719	19223.9	18820.8
CELE_Y46C8AL.2	clec-174	5.80445	4.27322e-26	0	2.75822	1.96729	3.66952	144.103	122.303	110.489	99.9636
CELE_K03A1.2	lron-7	0.520013	4.28794e-26	2750.6	2580.77	2691.26	2602.61	3896.25	3666.94	3873.47	3797.55
CELE_Y39A1A.19	fmo-3	1.20702	5.677e-26	134.295	143.427	117.054	131.185	292.573	285.735	313.405	323.287
CELE_F49F1.1	drd-50	3.48144	7.9138e-26	120.572	41.3733	118.038	42.1995	1073.13	987.085	787.231	744.41
CELE_C15B12.8	C15B12.8	2.0718	9.39795e-26	95.085	51.4868	88.5282	56.8776	323.141	334.44	286.845	279.685
CELE_F48C1.9	F48C1.9	2.40571	1.20694e-25	22.5459	29.421	17.7056	21.0997	109.169	106.068	123.237	143.565
CELE_Y47H9C.1	Y47H9C.1	2.36908	1.54407e-25	43.1313	77.2301	57.0515	76.1425	405.018	355.004	257.098	295.637
CELE_T05B4.11	phat-5	-3.84604	2.28924e-25	631.286	1562.99	615.763	1686.14	42.576	59.5282	113.676	96.7733
CELE_K01D12.9	K01D12.9	-2.97	2.94542e-25	489.148	1181.44	482.97	1087.1	108.077	88.7511	101.989	114.852
CELE_R02D3.1	aass-1	0.633722	3.05191e-25	2338.89	2505.38	2433.54	2457.66	3935.55	4049	3578.13	3544.45
CELE_B0334.3	hacl-1	0.572748	4.01026e-25	3909.27	3687.74	3878.52	3818.14	5510.86	5719.03	5743.28	5772.37
CELE_Y58A7A.4	Y58A7A.4	2.72858	5.22136e-25	13.7236	21.1463	10.8201	13.7607	115.719	86.5864	91.3655	102.09
CELE_K02D7.4	dsc-4	0.945905	6.78467e-25	1538.02	1787.33	1589.57	1843.93	3599.31	3443.97	3011.87	2968.07
CELE_C40H1.8	C40H1.8	2.47433	1.13328e-24	35.2893	47.8091	27.5421	29.3562	158.295	172.091	226.289	222.259
CELE_Y22F5A.4	lys-1	2.00602	1.23996e-24	4005.33	2446.54	4058.52	2487.02	12558.8	12196.8	13714.4	13733.3
CELE_W04E12.8	clec-50	1.09861	1.25045e-24	7968.51	6628	7524.89	6515.23	16359	15979.5	14623.8	14360.7
CELE_W05B2.6	col-92	0.806588	2.69458e-24	1668.4	1448.98	1653.51	1428.36	2573.12	2627.9	2890.76	2747.94
CELE_F41F3.4	col-139	1.11889	6.04708e-24	6079.56	4650.36	5817.28	4338.29	11111.2	10991.1	11790.4	11462.8
CELE_C17F4.7	C17F4.7	1.2019	6.76514e-24	25967	24096.7	25303.3	24260.1	55246.1	54821.1	59408.8	59708
CELE_AC3.5	AC3.5	1.44027	8.19309e-24	790.088	543.369	758.391	545.841	1981.42	1911.4	1589.33	1672.8
CELE_T24D3.2	T24D3.2	1.8047	8.7341e-24	35.2893	45.9703	43.2804	33.0257	135.37	152.609	138.111	124.423
CELE_F57H12.6	F57H12.6	3.68932	1.20563e-23	59.7957	26.6628	60.0024	40.3647	367.9	340.934	839.288	858.198
CELE_C34F11.8	C34F11.8	1.2362	1.26618e-23	129.394	140.669	106.234	157.789	312.224	304.135	324.029	320.096
CELE_F25A2.1	F25A2.1	2.83538	1.53681e-23	14.7039	12.8717	16.722	20.1824	132.095	122.303	117.925	88.2657
CELE_F17C11.11	F17C11.11	1.59299	1.88986e-23	431.313	340.18	481.987	313.744	1318.76	1238.19	1070.89	1097.47
CELE_Y38E10A.7	lips-15	-1.97881	2.56547e-23	175.466	212.383	178.04	216.502	43.6677	32.4699	58.4314	63.8066
CELE_F57B1.3	col-159	1.34552	3.71573e-23	1740.94	1243.04	1821.71	1222.87	3901.71	3852.01	3861.79	3700.78
CELE_C53B7.4	asg-2	0.587054	5.82442e-23	1581.16	1684.35	1642.69	1760.45	2459.58	2363.81	2574.17	2621.39
CELE_C12D12.2	glt-1	0.578364	6.64652e-23	1467.45	1553.8	1415.47	1498.08	2187.75	2068.33	2305.39	2301.29
CELE_K07E3.8	vem-1	0.548833	7.00456e-23	1171.41	1254.07	1162.67	1293.51	1770.72	1808.57	1802.88	1762.12
CELE_C34G6.2	tyr-4	1.1418	9.06e-23	1126.32	935.036	1225.62	982.514	2098.23	2166.83	2560.36	2592.67
CELE_T10B10.2	ucr-2.2	0.501753	1.53312e-22	1519.4	1561.15	1577.77	1628.35	2160.46	2161.41	2274.58	2305.54
CELE_K04F1.9	K04F1.9	1.90436	2.49058e-22	60.776	41.3733	65.9043	49.5385	243.447	217.548	180.606	171.214
CELE_C12D12.1	C12D12.1	1.37039	3.4905e-22	1895.82	1637.46	1749.91	1707.24	4838.38	4742.77	4567.21	3924.1
CELE_K08D8.5	K08D8.5	2.21735	4.24034e-22	41.1708	26.6628	41.3131	26.604	141.92	125.55	202.916	158.453
CELE_C28C12.7	spp-10	0.460646	4.43534e-22	3622.05	3752.1	3467.35	3808.96	5098.2	4858.58	5036.79	5170.46
CELE_C18H7.1	C18H7.1	-4.52498	4.57985e-22	179.387	607.728	201.647	614.645	9.82522	12.988	20.1854	26.5861
CELE_T22H6.6	gei-3	0.577006	5.65028e-22	834.199	938.714	928.562	901.785	1312.21	1315.03	1358.8	1389.92
CELE_Y34B4A.9	nspg-13	1.30583	6.82208e-22	2102.65	2005.23	2057.79	2020.07	5216.1	5504.73	4773.32	4742.95
CELE_ZK1248.2	col-74	-3.71653	8.57731e-22	4850.31	11451.2	4895.61	10962.7	319.866	325.781	873.284	927.322
CELE_Y53F4B.30	gst-27	0.891815	1.20662e-21	815.574	672.086	856.756	682.531	1450.86	1439.5	1363.05	1360.14
CELE_AC3.7	ugt-1	0.999296	1.27175e-21	293.097	232.61	257.715	231.18	479.253	476.225	528.008	542.356
CELE_K07C6.3	cyp-35B2	1.51424	1.37589e-21	157.821	168.251	152.465	170.633	536.02	485.966	435.58	397.728
CELE_T05A10.3	ttr-14	1.07693	1.73672e-21	451.899	353.052	480.019	361.448	830.777	824.736	894.532	919.878
CELE_C31A11.5	oac-6	2.3611	2.14444e-21	30.388	33.0986	59.0188	24.7693	176.854	193.737	200.792	182.912
CELE_F23B2.12	pcp-2	1.95656	2.14508e-21	414.649	332.825	413.131	333.926	1733.61	1740.39	1161.19	1164.47
CELE_F14H12.1	col-165	-3.64336	2.88591e-21	6795.14	15926	6717.32	15243.2	482.528	474.061	1306.74	1312.29
CELE_Y41C4A.32	Y41C4A.32	2.96015	4.26039e-21	48.0326	19.3075	48.1987	24.7693	199.78	213.219	338.902	336.048
CELE_T20D3.2	nspg-7.1	1.31961	4.78048e-21	2859.41	2430.91	2694.21	2463.17	6743.38	6669.32	6446.58	6216.89
CELE_Y38E10A.13	nspe-1	1.09469	8.04413e-21	202.913	250.079	182.958	239.436	472.702	441.591	489.762	467.915
CELE_R08H2.1	dhs-23	1.16102	1.04679e-20	151.94	158.138	136.727	155.037	375.542	348.51	281.533	341.365
CELE_F21H7.10	bgnt-1.3	-3.36638	1.04679e-20	96.0652	177.445	83.6099	173.385	7.64184	8.65864	20.1854	14.8882
CELE_F44D12.4	gipc-2	1.19643	1.05638e-20	531.3	422.008	518.382	371.539	972.697	955.698	1132.51	1160.22
CELE_F09G8.8	clec-160	0.663142	1.26462e-20	483.267	453.267	484.938	518.32	758.726	781.442	760.671	770.996
CELE_ZK1193.2	ZK1193.2	1.07389	1.3175e-20	664.615	520.384	600.024	483.459	1241.25	1225.2	1151.63	1154.9
CELE_C09B9.6	msp-55	1.02828	1.43434e-20	305.84	236.287	286.241	240.354	528.379	547.659	516.321	584.893
CELE_Y38E10A.17	Y38E10A.17	1.11242	1.88999e-20	325.445	248.24	292.143	258.701	563.313	547.659	653.37	664.652
CELE_F32H5.1	F32H5.1	0.670628	2.10147e-20	556.786	558.999	491.823	522.907	878.812	876.688	837.163	799.709
CELE_C33F10.1	C33F10.1	1.15302	2.15999e-20	248.985	201.35	246.895	170.633	478.161	487.049	486.574	475.359
CELE_M18.1	col-129	1.22217	2.40728e-20	6158.96	4296.39	6000.24	4215.36	11949.7	11461.9	12316.3	12493.3
CELE_K10C2.1	ctsa-2	1.0001	2.5067e-20	3187.8	3598.56	3368.99	3581.45	7382.02	7187.76	6271.29	6635.88
CELE_Y54G2A.33	clec-84	0.743845	2.79369e-20	554.826	617.841	500.676	584.371	989.072	948.121	945.527	900.736
CELE_T08A9.7	spp-3	0.884599	3.06203e-20	3062.32	3156.32	3020.78	3250.28	6449.71	6329.47	5349.13	4932.25
CELE_H39E23.3	H39E23.3	5.43989	5.65676e-20	0.980257	2.75822	0.983646	6.42166	82.9685	64.9398	188.043	155.263
CELE_F29G6.3	hpo-34	0.795212	5.79653e-20	6299.13	6481.82	6439.93	6568.44	11835	11530.1	11066.9	10321.8
CELE_Y37A1A.2	Y37A1A.2	2.19637	9.13097e-20	42.1511	27.5822	50.166	28.4388	183.404	169.926	154.046	170.151
CELE_Y49F6B.10	col-71	1.76291	1.17705e-19	859.686	657.376	835.116	657.761	2254.34	2189.55	2900.32	2869.17
CELE_W10C8.5	W10C8.5	1.30647	1.43587e-19	1591.94	1115.24	1551.21	1178.83	3435.55	3521.9	3145.74	3342.4
CELE_W01F3.2	W01F3.2	0.90377	1.5204e-19	643.049	663.811	645.272	624.736	1081.87	1090.99	1297.18	1350.57
CELE_F01D4.2	ugt-44	1.06563	1.74553e-19	589.135	513.029	612.812	524.741	1115.71	1002.24	1264.24	1303.78
CELE_F39E9.1	F39E9.1	1.49095	2.35183e-19	55.8747	51.4868	60.0024	48.6211	156.112	140.703	143.423	165.897
CELE_Y71H10B.1	Y71H10B.1	0.595684	2.47387e-19	1801.71	1572.19	1851.22	1627.43	2634.25	2627.9	2577.36	2512.91
CELE_Y69H2.3	Y69H2.3	1.19788	3.712e-19	3162.31	2202.9	3058.16	2191.62	6321.98	6514.55	5720.97	5790.44
CELE_ZK896.7	clec-186	1.83883	4.02533e-19	603.839	360.407	582.319	378.878	2055.65	1939.54	1604.21	1285.7
CELE_C45B2.3	C45B2.3	5.67046	4.41771e-19	0.980257	3.67763	2.95094	5.50428	70.9599	81.1748	277.284	243.528
CELE_F10A3.17	F10A3.17	0.877306	4.86512e-19	200.953	191.237	170.171	180.724	334.058	356.087	324.029	350.936
CELE_ZK675.4	ZK675.4	-3.31103	5.71864e-19	235.262	536.014	254.764	556.85	24.0172	20.5643	56.3066	58.4893
CELE_T07A5.1	T07A5.1	1.89996	6.0902e-19	33.3288	32.1792	44.2641	34.8604	125.545	108.233	151.922	153.136
CELE_T23F1.6	pqn-71	-3.74903	6.51909e-19	340.149	867	284.274	927.471	32.7507	21.6466	52.0571	73.3775
CELE_T04C12.1	T04C12.1	-3.12496	6.74071e-19	172.525	330.067	155.416	332.092	13.1003	20.5643	42.4956	37.2205
CELE_R08E5.3	rips-1	2.28598	6.90124e-19	446.017	231.69	430.837	227.51	1741.25	1772.86	1477.78	1520.72
CELE_K10C2.4	fah-1	0.457692	8.68886e-19	1977.18	1958.34	1996.8	2028.33	2710.67	2678.77	2759.03	2784.09
CELE_C09F12.1	clc-1	1.33124	9.97872e-19	230.361	195.834	266.568	195.402	494.536	551.988	600.25	585.957
CELE_F45E4.3	cla-1	-2.88788	1.07066e-18	515.615	1416.81	557.727	1336.62	105.894	106.068	175.294	129.74
CELE_Y55H10A.1	vha-19	0.51304	1.07945e-18	5843.31	5564.25	5865.48	5711.61	8630.91	8437.85	7869.12	7862.03
CELE_Y74C9A.2	nlp-40	0.714797	1.12551e-18	2437.9	2173.48	2416.82	2363.17	4037.07	3748.11	3941.47	3685.89
CELE_F14H3.10	cyp-35D1	2.11457	1.39067e-18	81.3614	40.4539	73.7735	34.8604	279.473	226.207	249.662	239.275
CELE_F56F10.3	cdo-1	0.873826	1.63048e-18	456.8	473.494	520.349	502.724	950.863	976.262	813.79	839.056
CELE_T05H10.3	mtre-1	-3.20259	1.65342e-18	1823.28	3815.54	1630.89	3721.81	182.312	155.856	433.455	422.187
CELE_F36F12.1	F36F12.1	-3.31931	1.92975e-18	88.2232	240.884	120.988	223.841	13.1003	8.65864	25.4973	20.2054
CELE_K05F1.2	msp-142	1.02615	1.96126e-18	198.012	159.057	205.582	161.459	379.909	343.099	354.838	394.537
CELE_F22B5.3	cut-3	-3.54639	2.0113e-18	3958.28	9272.21	4193.28	9615.06	301.307	279.241	874.347	859.262
CELE_T16H5.1	inx-19	-2.62654	2.27834e-18	89.2034	169.171	80.659	144.946	18.5588	23.8113	16.9982	19.142
CELE_F08F3.3	rhr-1	0.682443	2.56883e-18	3866.14	4225.59	4193.28	4033.72	7027.22	7154.2	5875.01	6133.94
CELE_W03B1.7	oac-51	-3.02016	2.62892e-18	375.439	852.29	380.671	902.702	54.5846	46.5402	113.676	94.6464
CELE_T10B9.10	cyp-13A7	-2.72762	2.90416e-18	314.663	620.599	314.767	545.841	51.3095	43.2932	82.8664	93.5829
CELE_F45E4.1	warf-1	3.05555	3.20627e-18	18.6249	9.19406	15.7383	12.8433	79.6935	84.4218	142.36	160.58
CELE_W08E12.6	W08E12.6	-3.5243	3.29837e-18	262.709	649.101	246.895	614.645	25.1089	17.3173	61.6186	49.9818
CELE_F55F3.3	nkb-3	0.571898	3.37157e-18	1986.98	2097.17	1898.44	2129.24	2977.04	3051.09	3051.18	2980.83
CELE_R05A10.1	R05A10.1	-4.9143	3.94466e-18	58.8154	160.896	66.8879	133.937	1.09169	4.32932	4.24956	4.25377
CELE_H25K10.1	H25K10.1	2.64994	4.08327e-18	18.6249	7.35525	8.85282	8.25642	65.5015	63.8575	72.2425	66.9969
CELE_F46F2.5	F46F2.5	1.74507	4.12602e-18	52.9339	36.7763	38.3622	34.8604	150.653	121.221	150.859	122.296
CELE_D1037.3	ftn-2	0.350108	4.23042e-18	4608.19	4318.45	4665.43	4521.77	5727.01	5851.08	5805.96	5702.18
CELE_F28B4.3	F28B4.3	1.65924	4.65828e-18	3334.84	2799.59	3528.34	2804.43	10594.9	10668.5	9184.36	8928.66
CELE_C18H9.6	C18H9.6	1.65083	5.86666e-18	622.464	527.739	645.272	495.385	2015.26	2001.23	1602.08	1573.89
CELE_LLC1.2	nspg-9	0.947248	6.04904e-18	1963.46	1745.03	1978.11	1654.95	3489.05	3476.44	3470.83	3717.8
CELE_C06E7.88	C06E7.88	-2.81851	6.2985e-18	213.696	380.634	178.04	391.721	32.7507	21.6466	49.9323	60.6162
CELE_Y97E10AR.1	Y97E10AR.1	-2.74682	6.80669e-18	785.186	1936.27	792.819	1883.38	163.754	145.032	245.412	249.909
CELE_D1086.6	D1086.6	0.970161	7.66502e-18	1555.67	1183.28	1555.14	1164.16	2839.49	2719.9	2565.67	2565.02
CELE_M176.6	kin-15	1.41816	7.78088e-18	50.9734	46.8897	45.2477	44.0342	128.82	122.303	123.237	125.486
CELE_F22B7.4	fip-1	5.69145	7.79368e-18	0	3.67763	0	3.66952	65.5015	66.0221	120.05	138.248
CELE_C02C2.1	tyr-1	0.980242	8.70385e-18	447.978	407.297	439.69	455.02	826.41	768.455	942.34	914.561
CELE_C35A5.11	C35A5.11	-3.09058	9.24134e-18	379.36	845.854	388.54	820.138	37.1175	45.4579	94.5527	108.471
CELE_ZK525.2	aqp-11	0.738503	1.24214e-17	680.299	708.862	742.653	688.035	1269.64	1243.6	1094.26	1097.47
CELE_F27C1.7	atp-3	0.325478	1.34773e-17	10605.4	10002.2	10541.7	10232.5	12970.4	12737.9	13201.3	12942.1
CELE_C13D9.9	ugt-7	1.47975	1.61247e-17	76.4601	82.7466	60.9861	57.7949	222.705	187.243	162.546	203.118
CELE_E02H4.4	E02H4.4	-3.26312	1.7964e-17	153.9	342.939	127.874	353.191	18.5588	20.5643	35.0589	27.6495
CELE_F44D12.2	F44D12.2	-1.19535	1.84009e-17	259.768	302.485	266.568	348.604	124.453	109.315	147.672	132.93
CELE_C32H11.10	dod-21	9.28486	1.92894e-17	0	0	0.983646	0	191.046	203.478	159.358	164.834
CELE_R09B5.9	cnc-4	2.24445	1.93265e-17	94.1047	92.8601	71.8062	78.8947	288.207	304.135	481.262	526.404
CELE_K05G3.3	cah-3	0.746856	2.06861e-17	1097.89	1208.1	1048.57	1089.85	1955.22	1868.1	1796.5	1839.76
CELE_F01D5.1	F01D5.1	1.87741	2.6037e-17	96.0652	182.042	121.972	179.806	591.697	553.071	513.134	475.359
CELE_H20E11.1	H20E11.1	1.42027	3.75521e-17	130.374	80.9078	135.743	92.6554	292.573	320.37	293.22	267.988
CELE_E03H4.8	E03H4.8	0.901433	3.90609e-17	182.328	216.98	198.697	215.584	365.717	419.944	372.899	362.634
CELE_C31A11.7	oac-7	2.32631	3.96608e-17	19.6051	20.2269	13.771	12.8433	97.1605	64.9398	90.3031	80.8216
CELE_F22H10.3	F22H10.3	0.875513	5.42405e-17	2216.36	2067.75	2313.54	1865.03	3673.54	3684.25	4169.88	3996.42
CELE_C29G2.3	C29G2.3	-4.10273	5.9178e-17	95.085	244.562	91.4791	249.527	6.55015	2.16466	10.6239	20.2054
CELE_C24G6.7	grl-1	-3.02783	7.37162e-17	124.493	269.386	123.939	286.223	19.6504	12.988	38.246	27.6495
CELE_F37C4.5	F37C4.5	0.76016	7.45592e-17	3346.6	2697.54	2996.19	2681.5	4621.13	4655.1	5281.14	5292.75
CELE_C02E7.7	C02E7.7	-2.21681	7.5036e-17	1993.84	4075.73	1836.47	4045.65	551.304	607.187	723.487	689.111
CELE_F49F1.5	F49F1.5	1.59094	1.00354e-16	147.039	216.061	126.89	216.502	598.247	598.529	466.389	467.915
CELE_C25E10.8	C25E10.8	1.39432	1.1415e-16	68.618	51.4868	65.9043	65.134	139.737	153.691	180.606	185.039
CELE_Y49A3A.2	vha-13	0.514166	1.19497e-16	12134.6	13208.2	12754.9	13095.6	19087.1	19165.9	17092.8	17769.1
CELE_C33A12.19	C33A12.19	1.35614	1.20455e-16	226.439	178.365	188.86	198.154	555.671	524.93	469.576	476.422
CELE_M142.2	cut-6	-2.93617	1.30382e-16	418.57	1000.31	435.755	982.514	77.5101	45.4579	129.612	118.042
CELE_F57H12.3	ora-1	3.56759	1.39454e-16	32.3485	38.6151	32.4603	36.6952	206.33	196.984	640.621	617.86
CELE_K07C11.7	K07C11.7	0.600935	1.45778e-16	1058.68	997.556	1121.36	982.514	1517.45	1493.62	1710.45	1585.59
CELE_Y73B6BL.34	bli-6	1.58134	1.61559e-16	753.818	576.468	727.898	624.736	1835.13	1632.15	2356.38	2203.45
CELE_C49H3.16	C49H3.16	-2.71299	2.11803e-16	93.1245	204.108	85.5772	179.806	19.6504	16.235	24.435	25.5226
CELE_F21H7.5	F21H7.5	1.01097	2.32901e-16	222.518	226.174	278.372	214.667	437.768	423.191	509.947	525.341
CELE_F35D2.5	syd-1	-2.68563	2.50772e-16	316.623	676.683	305.914	706.383	50.2178	57.3635	94.5527	109.535
CELE_C49G7.10	C49G7.10	1.39862	2.50772e-16	65.6773	43.2121	62.9534	57.7949	143.012	167.761	150.859	142.501
CELE_E02C12.8	E02C12.8	1.47432	2.75472e-16	63.7167	45.9703	44.2641	49.5385	161.57	155.856	123.237	124.423
CELE_T01H3.1	vha-4	0.491841	2.78063e-16	4080.81	4006.77	4023.11	3975.01	5836.18	5978.79	5413.94	5391.65
CELE_C32H11.4	C32H11.4	1.90811	2.91738e-16	318.584	549.805	307.881	570.61	1996.7	1933.04	1312.05	1317.61
CELE_F32A5.3	ctsa-3.1	0.739822	2.97437e-16	1007.7	917.568	1021.02	927.471	1627.71	1626.74	1538.34	1674.92
CELE_VW02B12L.1	vha-6	0.885192	2.97437e-16	6002.12	5763.76	5901.88	6098.74	11867.8	11882.9	9918.47	10228.2
CELE_R11D1.3	R11D1.3	-3.11784	3.13895e-16	42.1511	77.2301	53.1169	88.0685	7.64184	4.32932	11.6863	6.38066
CELE_ZK1010.4	ZK1010.4	-2.83247	3.30267e-16	97.0455	220.658	101.316	207.328	19.6504	14.0703	21.2478	32.9667
CELE_C46H11.10	C46H11.10	-2.55646	3.46109e-16	114.69	234.449	111.152	246.775	31.6591	21.6466	32.9341	34.0302
CELE_F35C5.6	clec-63	1.24394	3.93545e-16	17831.9	25504.3	18492.5	28278.2	57276.7	56276.8	53128	46735.1
CELE_B0213.2	nlp-27	1.482	4.31522e-16	730.292	485.447	604.942	484.377	1481.43	1547.73	1756.13	1651.53
CELE_C34B2.8	ndua-13	0.369903	4.62843e-16	3882.8	3799.91	3737.86	3563.1	4804.53	4867.24	4923.11	4766.35
CELE_ZC13.3	mam-1	-2.62201	5.63586e-16	193.111	439.476	232.14	447.681	34.9341	37.8816	69.0553	71.2507
CELE_F53H2.2	cnc-7	2.96255	6.17722e-16	62.7365	18.3881	34.4276	23.8519	213.972	183.996	365.462	320.096
CELE_Y71F9B.1	Y71F9B.1	0.813373	8.5945e-16	211.736	227.093	226.239	217.419	389.734	384.227	393.084	383.903
CELE_C01G6.9	C01G6.9	-2.58524	8.66503e-16	180.367	357.649	166.236	376.126	31.6591	32.4699	60.5562	55.299
CELE_W04H10.5	W04H10.5	-2.51643	9.14752e-16	82.3416	121.362	66.8879	140.359	12.0086	16.235	18.0606	25.5226
CELE_R13H4.8	idpb-5	-2.79596	1.01218e-15	94.1047	212.383	99.3483	204.576	17.4671	14.0703	28.6845	27.6495
CELE_T27A3.4	spch-3	1.0877	1.33962e-15	300.939	242.723	294.11	231.18	510.912	518.436	641.683	598.718
CELE_C26B9.5	C26B9.5	0.768525	1.37384e-15	988.1	1131.79	1036.76	1105.44	1776.18	1775.02	1922.93	1787.65
CELE_F47B8.11	sss-2	1.28946	1.3804e-15	138.216	87.3436	108.201	102.747	262.006	216.466	293.22	293.51
CELE_C27A7.4	che-11	-2.69715	1.64161e-15	109.789	248.24	93.4464	216.502	22.9255	22.7289	32.9341	24.4592
CELE_F55C5.1	ssp-35	1.22617	1.64161e-15	56.8549	62.5196	80.659	66.9687	146.287	146.115	167.858	163.77
CELE_R09H10.5	R09H10.5	1.15143	1.70388e-15	1947.77	2108.2	1997.79	2107.22	4861.3	4822.86	4259.12	4185.71
CELE_Y54G2A.39	clec-80	1.56	1.98946e-15	127.433	115.845	139.678	109.168	377.725	352.84	383.523	336.048
CELE_K01D12.1	K01D12.1	-2.99344	2.10563e-15	204.874	539.692	234.108	504.559	25.1089	30.3052	62.681	68.0603
CELE_T25C12.3	T25C12.3	1.31042	2.20002e-15	5268.88	4553.82	5604.82	4677.72	13273.9	12737.9	11779.8	12071.1
CELE_K07C10.1	ptr-13	0.88074	2.44585e-15	409.748	352.133	444.608	349.522	696.499	652.645	742.61	770.996
CELE_F53F1.5	cut-2	-2.80908	2.46578e-15	8639.01	19858.3	8107.21	20278.7	1298.02	1310.7	3131.92	2375.73
CELE_Y37B11A.1	cutl-23	-3.17753	2.58615e-15	233.301	695.991	260.666	719.226	34.9341	35.7169	65.8682	74.441
CELE_F15H10.2	col-13	0.722642	2.65177e-15	397.004	444.073	444.608	412.821	655.015	687.28	730.924	729.522
CELE_C10C5.2	fbxc-58	1.6586	2.79344e-15	23.5262	35.8569	24.5912	25.6866	87.3353	88.7511	93.4903	77.6313
CELE_T16G1.6	T16G1.6	0.892191	2.8079e-15	254.867	267.547	257.715	275.214	496.72	471.896	479.138	511.516
CELE_T14A8.2	T14A8.2	-2.68617	2.93933e-15	238.203	627.035	254.764	647.67	62.2264	51.9519	81.804	78.6947
CELE_E03E2.1	cyp-43A1	1.03187	3.02065e-15	199.973	204.108	207.549	166.046	375.542	327.946	448.328	437.075
CELE_F28D1.3	thn-1	-2.02931	3.21556e-15	81.3614	65.2779	79.6753	67.8861	15.2837	15.1526	22.3102	19.142
CELE_B0491.2	sqt-1	2.07073	3.75869e-15	209.775	162.735	233.124	152.285	570.955	576.882	1002.9	1031.54
CELE_F20G2.5	F20G2.5	1.718	3.79295e-15	40.1906	58.842	34.4276	67.8861	171.396	191.572	152.984	148.882
CELE_C02E7.6	C02E7.6	-2.41495	4.23532e-15	3684.79	8081.58	3600.14	8085.79	847.153	789.019	1460.79	1300.59
CELE_Y38F2AL.4	vha-3	0.55477	4.4939e-15	4174.92	4382.81	3812.61	4550.2	6275.04	6272.1	6221.35	6089.27
CELE_R09E10.6	R09E10.6	1.06825	4.50315e-15	496.991	363.166	474.117	357.778	798.026	810.665	947.651	989.002
CELE_T17H7.1	idpp-1	1.14468	5.2047e-15	112.73	114.926	110.168	98.1597	218.338	235.948	243.287	265.861
CELE_B0478.1	jnk-1	-2.13517	5.21982e-15	296.038	604.969	287.225	540.337	74.235	81.1748	126.424	111.661
CELE_Y46G5A.10	cnp-2	0.771804	5.78239e-15	237.222	262.95	257.715	252.28	386.459	419.944	458.952	459.407
CELE_C41H7.7	clec-3	2.94707	6.63638e-15	3.92103	11.0329	8.85282	10.0912	50.2178	49.7872	80.7416	81.8851
CELE_T23F1.5	rocf-1	-2.82948	7.33297e-15	412.688	1029.74	410.18	986.184	66.5932	59.5282	135.986	137.184
CELE_C35D10.2	gipc-1	1.12983	7.35555e-15	386.221	281.338	358.047	283.47	597.155	653.727	789.355	822.041
CELE_ZK682.5	lron-2	-2.69996	7.36037e-15	406.807	983.765	420.017	994.44	78.6018	67.1045	147.672	138.248
CELE_C32H11.9	cld-1	8.6047	7.37837e-15	0.980257	0	0	0	106.986	137.456	100.927	103.154
CELE_Y38F2AL.3	vha-11	0.44965	7.403e-15	4437.63	4597.95	4525.76	4696.07	6533.77	6338.13	6020.56	6043.54
CELE_W03G1.7	asm-3	-1.08172	7.91508e-15	1357.66	1859.04	1428.25	1849.44	792.568	875.605	677.805	723.141
CELE_C46A5.4	C46A5.4	-3.18747	7.91508e-15	397.985	862.403	380.671	940.315	34.9341	35.7169	108.364	104.217
CELE_T16A9.5	T16A9.5	0.911178	8.71009e-15	156.841	126.878	136.727	134.855	253.272	238.113	275.159	276.495
CELE_T07C12.8	mam-5	-2.56373	9.27493e-15	78.4206	128.717	89.5118	140.359	9.82522	11.9056	23.3726	28.7129
CELE_Y43C5A.2	Y43C5A.2	0.896319	1.13017e-14	1424.31	1789.16	1526.62	1780.63	3175.73	3186.38	2694.22	3082.92
CELE_E04F6.8	E04F6.8	0.824777	1.15786e-14	588.154	525.9	572.482	513.733	948.68	934.051	1053.89	959.225
CELE_ZK1320.2	ZK1320.2	0.80414	1.19611e-14	1815.44	2121.07	1869.91	2270.52	3545.81	3647.45	3509.07	3403.02
CELE_T25E4.1	T25E4.1	-2.52462	1.20953e-14	368.577	933.198	393.458	995.357	92.7938	95.2451	127.487	152.072
CELE_C31B8.8	zmp-3	1.06509	1.26083e-14	159.782	120.442	113.119	125.681	248.906	281.406	286.845	267.988
CELE_R09B5.3	cnc-2	3.67161	1.288e-14	10.7828	10.1135	6.88552	7.33904	73.1433	64.9398	155.109	154.199
CELE_Y47G6A.17	ccep-290	-2.54346	1.29001e-14	115.67	294.21	161.318	266.04	26.2006	24.8936	39.3084	53.1721
CELE_ZK813.6	ZK813.6	-2.95441	1.30317e-14	72.5391	110.329	51.1496	122.929	4.36677	8.65864	15.9358	17.0151
CELE_C10G11.8	C10G11.8	1.16305	1.30475e-14	279.373	202.269	257.715	179.806	509.82	441.591	563.066	541.292
CELE_F30B5.1	dpy-13	1.67046	1.55215e-14	913.6	779.657	903.971	791.699	2181.2	2188.47	3183.98	3232.87
CELE_Y55B1AR.1	lec-6	1.48368	1.56451e-14	6662.81	5026.4	6559.94	5016.23	16268.4	16155.9	16839.9	15798.5
CELE_F02E8.1	asb-2	0.503661	1.5763e-14	5960.95	6405.5	5909.75	6552.85	8540.3	8278.74	9085.56	9299.81
CELE_F38A3.1	col-81	1.16689	1.60416e-14	4347.44	2913.6	4438.21	2929.19	8197.51	7800.35	8423.69	8420.34
CELE_F38E11.4	cutl-17	-2.71968	1.64132e-14	79.4009	176.526	82.6263	177.054	13.1003	19.4819	25.4973	20.2054
CELE_F42A10.3	anmt-2	0.811098	1.8027e-14	609.72	505.674	597.073	490.798	895.187	909.157	1039.02	1019.84
CELE_C03A7.14	abu-8	-2.54966	1.8027e-14	1069.46	2891.53	1188.24	3179.64	307.857	278.159	388.835	447.709
CELE_W09D12.1	zmp-4	0.717198	1.82157e-14	543.063	510.271	563.629	532.998	834.052	792.266	945.527	961.352
CELE_T10E9.7	nuo-2	0.359092	1.84049e-14	2704.53	2548.59	2705.03	2601.69	3465.03	3302.19	3393.27	3381.75
CELE_F54D5.7	F54D5.7	0.431535	1.92366e-14	2325.17	2213.93	2395.18	2266.85	3338.39	3093.3	3046.93	2929.78
CELE_C27D8.1	C27D8.1	1.15036	2.10543e-14	70.5785	71.7137	84.5936	59.6297	147.378	142.868	172.107	172.278
CELE_Y69H2.14	col-42	2.055	2.12487e-14	9667.3	4236.62	9496.12	4144.72	27733.3	27176.2	29640.7	29907.2
CELE_F53B6.4	F53B6.4	1.00876	2.14986e-14	223.499	193.995	245.912	167.881	391.917	401.545	428.143	448.773
CELE_M03A8.1	dhs-28	0.649725	2.43132e-14	2975.08	3065.3	2806.34	3065.88	4795.8	4689.74	4564.03	4640.86
CELE_ZK287.9	ZK287.9	1.38176	2.58631e-14	86.2627	77.2301	61.9697	55.0428	213.972	179.667	180.606	156.326
CELE_C29F9.4	pals-24	0.934775	2.75647e-14	157.821	214.222	157.383	209.163	356.983	347.428	350.589	359.444
CELE_H20E11.3	H20E11.3	1.36775	2.90657e-14	69.5983	51.4868	63.937	62.3818	156.112	188.325	150.859	142.501
CELE_ZC504.2	acr-8	-2.45654	3.1105e-14	157.821	323.631	134.76	331.174	28.384	40.0462	49.9323	54.2356
CELE_F23F12.3	F23F12.3	1.29378	3.46514e-14	66.6575	58.842	55.0842	55.9602	148.47	166.679	124.3	140.374
CELE_T21G5.4	smz-2	1.07959	3.7387e-14	105.868	99.2959	122.956	96.3249	200.871	217.548	225.227	252.036
CELE_F32A11.3	spe-18	1.04179	3.86911e-14	243.104	178.365	198.697	158.707	379.909	359.334	430.268	431.758
CELE_Y110A2AL.4	Y110A2AL.4	-2.47311	4.07641e-14	611.681	1409.45	612.812	1297.18	125.545	113.645	231.601	237.148
CELE_Y59E9AL.3	nsph-4.2	1.28079	4.154e-14	114.69	86.4242	130.825	77.9773	229.255	239.195	264.535	260.543
CELE_ZK938.1	ZK938.1	1.00297	4.20542e-14	197.032	160.896	210.5	155.037	338.424	327.946	394.147	387.093
CELE_T06D8.3	plpr-1	-2.4806	4.21339e-14	508.754	1139.14	586.253	1256.81	100.436	111.48	193.355	220.133
CELE_ZK970.4	vha-9	0.387549	4.38688e-14	3358.36	3547.07	3494.89	3441.09	4633.14	4648.61	4505.59	4320.77
CELE_C14F11.4	C14F11.4	1.29734	4.62386e-14	461.701	275.822	439.69	276.131	919.204	890.758	887.095	872.023
CELE_F26F12.4	F26F12.4	-2.5097	4.80416e-14	177.427	406.378	201.647	434.838	33.8424	42.2109	74.3673	63.8066
CELE_F11C7.5	osm-11	0.566619	5.07075e-14	5549.24	5047.54	5577.27	5238.24	8035.94	7924.82	7729.95	8020.48
CELE_F08C6.1	adt-2	0.75656	5.49553e-14	542.082	474.414	586.253	459.607	889.729	811.748	887.095	893.292
CELE_F55C10.3	col-155	0.907093	5.69279e-14	700.884	585.662	658.059	563.271	1078.59	1067.18	1286.55	1268.69
CELE_C10H11.6	ugt-26	1.9112	5.89243e-14	175.466	91.9406	179.024	93.5728	402.834	426.438	568.378	630.621
CELE_ZC84.1	ZC84.1	-2.32676	6.21019e-14	167.624	387.99	190.827	366.952	45.851	38.9639	62.681	74.441
CELE_Y69E1A.1	Y69E1A.1	0.912328	6.38396e-14	225.459	162.735	203.615	166.046	348.25	359.334	362.275	354.126
CELE_R04B5.6	R04B5.6	-3.09946	6.41744e-14	55.8747	95.6183	43.2804	89.9032	3.27507	7.57631	11.6863	10.6344
CELE_T28F2.3	cah-6	-2.20418	6.44347e-14	225.459	546.127	263.617	556.85	70.9599	80.0924	103.052	91.4561
CELE_ZK970.7	srlf-34	3.41846	6.78363e-14	28.4275	45.9703	22.6239	61.4645	279.473	277.077	572.628	567.878
CELE_F35C5.5	clec-62	1.17215	6.79138e-14	737.154	1027.9	775.113	1255.89	2210.68	2179.81	2052.54	2114.12
CELE_Y39E4B.8	zig-8	-2.19438	7.0738e-14	190.17	382.473	180.991	379.795	46.9427	48.7049	73.3049	78.6947
CELE_F45G2.2	myo-6	-2.26712	7.11135e-14	506.793	1248.55	607.893	1259.56	131.003	166.679	222.039	232.894
CELE_F35E12.10	F35E12.10	1.12133	7.12649e-14	614.621	466.139	616.746	409.151	1126.63	1090.99	1192	1170.85
CELE_ZK484.5	msrp-2	1.11988	7.42231e-14	382.3	283.177	428.87	300.901	676.849	686.197	843.537	823.105
CELE_R09E10.5	R09E10.5	-2.36735	8.15453e-14	1432.16	3022.09	1558.1	3109.92	290.39	293.312	560.942	623.177
CELE_K10D11.6	K10D11.6	1.34314	8.40112e-14	65.6773	101.135	79.6753	92.6554	230.347	260.842	185.918	185.039
CELE_Y69A2AR.18	Y69A2AR.18	0.409341	8.71945e-14	11498.4	10750.6	11424.1	10560	14255.3	14921	14759.8	14806.3
CELE_Y38C1AA.7	Y38C1AA.7	0.987502	9.67087e-14	385.241	287.774	401.328	276.131	677.94	639.657	708.614	648.7
CELE_H06O01.1	pdi-3	0.2895	1.02344e-13	16468.3	16007.8	15942	15291.8	19912.5	19746	19283.4	18924
CELE_F46G10.4	F46G10.4	1.0825	1.03952e-13	120.572	120.442	138.694	111.92	290.39	288.982	225.227	236.084
CELE_K02A4.1	bcat-1	0.659257	1.05039e-13	4273.92	4900.44	4226.73	4908.9	7566.51	7912.92	6616.56	6823.05
CELE_Y45G5AM.3	Y45G5AM.3	0.930222	1.2631e-13	144.098	148.024	163.285	129.351	274.015	274.912	269.847	294.574
CELE_T06E4.10	idpc-7	-2.74243	1.33534e-13	162.723	420.169	161.318	498.137	41.4843	38.9639	42.4956	62.7431
CELE_C03H5.6	C03H5.6	-2.34519	1.36366e-13	132.335	263.87	135.743	340.348	38.2092	36.7992	44.6204	52.1087
CELE_ZK1248.6	msp-64	0.994944	1.43607e-13	385.241	273.064	359.031	250.445	640.823	632.081	622.56	628.495
CELE_C16B8.3	C16B8.3	0.552095	1.44387e-13	1490.97	1631.03	1450.88	1623.76	2182.29	2212.28	2483.87	2208.77
CELE_ZK455.1	aco-1	0.523248	1.5205e-13	4496.44	3836.68	4475.59	3845.66	5948.63	5804.54	6187.36	5991.44
CELE_T05A7.11	T05A7.11	-2.68972	1.56647e-13	152.92	282.258	129.841	298.149	16.3754	21.6466	47.8075	47.8549
CELE_C01B10.6	C01B10.6	0.779704	1.63014e-13	2196.76	2823.5	2234.84	2886.08	4311.09	4231.91	4505.59	4364.37
CELE_F54B11.10	F54B11.10	-2.45075	1.64617e-13	63.7167	92.8601	44.2641	86.2337	8.73353	10.8233	16.9982	15.9516
CELE_M02G9.1	appg-1	-2.31851	1.64943e-13	347.011	795.287	349.194	802.708	93.8855	81.1748	135.986	148.882
CELE_T06E4.6	col-146	0.615741	1.80352e-13	411.708	427.524	380.671	382.547	604.797	619.093	616.186	615.733
CELE_Y70C5A.3	Y70C5A.3	-2.01531	1.83176e-13	55.8747	75.3913	60.0024	86.2337	18.5588	12.988	19.123	18.0785
CELE_T22A3.2	hsp-12.1	-2.14867	1.83763e-13	262.709	492.802	290.176	488.964	64.4098	57.3635	130.674	93.5829
CELE_Y71F9AM.9	Y71F9AM.9	1.58044	1.8647e-13	48.0326	63.439	52.1332	55.9602	177.946	189.408	147.672	142.501
CELE_C55A6.4	C55A6.4	1.15422	1.98749e-13	105.868	102.054	141.645	86.2337	228.164	246.771	256.036	237.148
CELE_C26F1.1	C26F1.1	-2.23677	1.98803e-13	615.602	1345.09	669.863	1499.92	199.78	150.444	277.284	248.846
CELE_R07B1.9	R07B1.9	-2.7122	2.09603e-13	249.966	606.808	234.108	635.744	42.576	46.5402	94.5527	79.7582
CELE_F55G11.5	dod-22	1.35553	2.1997e-13	98.0257	157.219	93.4464	157.789	337.333	320.37	321.904	319.033
CELE_C09G5.6	bli-1	2.14577	2.22648e-13	147.039	104.812	149.514	81.6468	409.384	356.087	704.364	665.715
CELE_Y47D3B.3	Y47D3B.3	-2.96404	2.27164e-13	66.6575	179.284	71.8062	158.707	7.64184	12.988	18.0606	22.3323
CELE_F32A7.3	eva-1	-2.26898	2.41496e-13	648.93	1385.55	670.847	1420.1	141.92	159.103	268.785	286.066
CELE_D2005.6	D2005.6	-2.32791	2.948e-13	344.07	787.931	386.573	756.839	81.8769	75.7631	127.487	168.024
CELE_C56C10.4	C56C10.4	-2.48409	2.948e-13	155.861	317.195	161.318	330.257	27.2923	27.0583	50.9947	66.9969
CELE_F35G2.5	F35G2.5	-3.1447	3.06955e-13	41.1708	98.3765	42.2968	74.3078	9.82522	3.24699	8.49912	7.4441
CELE_C03G5.1	sdha-1	0.322371	3.14295e-13	3029	2969.68	3238.16	3122.76	3855.85	3957	3807.6	3832.65
CELE_W07G4.1	W07G4.1	-3.74683	3.25632e-13	32.3485	101.135	47.215	92.6554	3.27507	3.24699	7.43673	6.38066
CELE_T20F5.4	T20F5.4	-2.8005	3.33513e-13	1253.75	2764.66	1206.93	2775.99	136.461	178.584	417.519	415.806
CELE_T02G5.3	T02G5.3	-1.14131	3.43692e-13	216.637	257.434	182.958	244.94	89.5187	99.5744	117.925	102.09
CELE_W04E12.9	W04E12.9	-2.84666	3.60028e-13	49.9931	92.8601	49.1823	85.3163	6.55015	3.24699	14.8735	13.8248
CELE_K08D12.2	rpi-2	-2.09156	3.72402e-13	177.427	330.067	173.122	352.274	49.1261	47.6225	67.9929	77.6313
CELE_F55B11.4	F55B11.4	0.654244	3.72402e-13	426.412	444.993	389.524	488.046	687.766	665.633	668.243	732.712
CELE_F01F1.12	aldo-2	0.462101	3.90095e-13	21446.1	18421.2	21423.8	19074.2	27527	27345.1	28380.7	27450.6
CELE_F56F11.5	trpl-1	-2.65966	3.93659e-13	90.1837	207.786	93.4464	190.815	17.4671	12.988	27.6221	34.0302
CELE_Y32G9A.6	nphp-2	-2.0454	3.97517e-13	83.3219	144.347	85.5772	155.955	26.2006	21.6466	32.9341	32.9667
CELE_E04F6.3	maoc-1	0.567459	4.23119e-13	1227.28	1201.66	1188.24	1124.71	1746.71	1724.15	1797.56	1757.87
CELE_F37B1.2	gst-12	1.40801	4.23614e-13	56.8549	58.842	55.0842	66.9687	144.103	139.621	169.982	177.595
CELE_R03C1.1	R03C1.1	-2.53777	4.24423e-13	380.34	878.953	421.984	1062.33	88.427	75.7631	158.296	149.945
CELE_Y44A6D.2	tpan-1	-1.8088	4.35945e-13	457.78	891.824	477.068	871.511	162.662	153.691	239.038	214.815
CELE_C53A5.2	C53A5.2	-2.61306	4.42569e-13	99.006	206.866	93.4464	203.658	15.2837	18.3996	38.246	26.5861
CELE_ZK1290.3	rol-8	1.89368	4.51888e-13	198.992	153.541	208.533	154.12	496.72	451.332	873.284	834.802
CELE_R05H5.8	tts-2	-2.96135	4.88035e-13	2865.29	7123.56	2670.6	7229.87	339.516	355.004	928.528	930.512
CELE_C03G6.14	cyp-35A1	1.50783	4.99607e-13	50.9734	33.0986	34.4276	37.6126	129.911	116.892	103.052	93.5829
CELE_T28C12.4	cest-24	0.790836	5.2471e-13	515.615	620.599	513.463	620.149	930.121	886.429	1012.46	1099.6
CELE_W09C3.6	gsp-3	0.870832	5.29513e-13	259.768	203.189	225.255	199.071	370.083	387.474	398.396	464.724
CELE_F32A5.2	skpo-3	0.660053	5.43455e-13	574.431	475.333	577.4	552.263	860.253	837.724	921.092	823.105
CELE_Y39B6A.48	hot-2	-2.3236	5.61863e-13	100.967	207.786	90.4954	218.336	24.0172	32.4699	29.7469	37.2205
CELE_C44H4.1	lron-1	-2.34951	5.82322e-13	104.888	197.672	106.234	197.237	15.2837	25.9759	35.0589	42.5377
CELE_T03F1.5	gsp-4	0.834514	5.9531e-13	244.084	193.995	231.157	190.815	344.974	365.828	402.646	417.933
CELE_T28H10.2	T28H10.2	1.2887	6.0486e-13	82.3416	68.0361	73.7735	87.1511	207.421	211.054	164.67	177.595
CELE_C35B8.1	col-175	1.57683	6.10619e-13	385.241	317.195	396.409	326.587	890.82	913.487	1192	1254.86
CELE_ZK265.2	col-63	1.94711	6.31624e-13	317.603	257.434	331.489	255.032	853.703	865.864	1352.42	1405.87
CELE_F08B4.8	F08B4.8	1.11907	6.31624e-13	171.545	125.959	188.86	142.194	277.29	326.864	377.148	381.776
CELE_T10B5.4	T10B5.4	-1.86275	6.37799e-13	198.992	368.682	197.713	354.109	52.4012	80.0924	92.4279	82.9485
CELE_K08C9.4	col-65	-2.30468	6.72299e-13	2236.95	5405.19	2113.86	5426.3	626.631	566.059	940.215	940.083
CELE_C56G2.4	C56G2.4	-1.93086	6.77684e-13	211.736	409.136	210.5	399.06	62.2264	64.9398	100.927	94.6464
CELE_F07C3.2	F07C3.2	-2.02506	6.99621e-13	186.249	308.001	146.563	341.265	46.9427	53.0342	72.2425	69.1238
CELE_DY3.5	pqn-26	-2.24243	7.4031e-13	301.919	554.402	286.241	626.571	67.6849	60.6105	137.048	108.471
CELE_C08G9.2	C08G9.2	-2.08489	7.44503e-13	148.019	323.631	156.4	299.983	42.576	46.5402	60.5562	69.1238
CELE_F59B1.8	F59B1.8	1.15304	7.44503e-13	269.571	185.72	236.075	180.724	537.112	509.778	441.954	448.773
CELE_F18G5.2	pes-8	1.14946	7.55459e-13	140.177	114.006	149.514	145.863	268.556	258.677	343.152	347.746
CELE_K07G5.3	mks-6	-2.26051	7.71687e-13	97.0455	178.365	89.5118	184.393	17.4671	23.8113	37.1836	36.157
CELE_K10G6.4	cank-26	-2.21916	7.81968e-13	104.888	193.075	85.5772	170.633	26.2006	20.5643	28.6845	43.6011
CELE_C49G7.12	C49G7.12	2.42289	8.12151e-13	9.80257	7.35525	6.88552	11.0086	56.768	46.5402	42.4956	42.5377
CELE_R186.6	mpst-7	1.63334	8.57835e-13	24.5064	26.6628	32.4603	26.604	75.3267	93.0804	90.3031	82.9485
CELE_F54C9.4	col-38	1.59453	8.65209e-13	650.891	476.253	630.517	506.394	1420.29	1372.39	2081.22	1962.05
CELE_Y46C8AL.1	clec-73	1.03923	8.67799e-13	106.848	91.0212	103.283	77.9773	180.129	177.502	200.792	219.069
CELE_Y24D9A.8	tald-1	0.537361	8.97974e-13	3823.98	3253.78	3962.13	3333.76	5322	5282.85	5217.4	5035.4
CELE_T21B6.2	pho-7	1.34807	9.13069e-13	85.2824	65.2779	80.659	53.208	183.404	189.408	174.232	175.468
CELE_K03E6.5	unc-1	-1.9821	9.86854e-13	430.333	901.018	447.559	963.249	153.928	134.209	206.104	199.927
CELE_T08G5.3	T08G5.3	-2.28306	9.92555e-13	62.7365	79.9884	47.215	91.738	9.82522	11.9056	18.0606	18.0785
CELE_Y54G2A.45	Y54G2A.45	1.31878	1.01452e-12	532.28	467.058	473.134	454.103	1295.84	1366.98	1058.14	1084.71
CELE_K10D11.1	dod-17	1.43761	1.08421e-12	93.1245	177.445	103.283	160.542	353.708	378.816	328.278	389.22
CELE_C04G2.8	spch-1	1.06828	1.13738e-12	301.919	227.093	307.881	245.858	512.003	506.531	667.181	582.767
CELE_C35E7.4	C35E7.4	-2.21499	1.14785e-12	430.333	992.04	410.18	874.263	106.986	109.315	193.355	173.341
CELE_K08F4.4	glt-3	-1.48966	1.19536e-12	140.177	195.834	135.743	236.684	70.9599	53.0342	64.8058	63.8066
CELE_T14A8.1	ric-3	-2.07046	1.2216e-12	495.03	1012.27	500.676	962.332	126.636	126.633	218.852	235.021
CELE_F48E3.9	F48E3.9	-2.09477	1.2505e-12	100.967	196.753	91.4791	188.063	29.4757	29.2229	35.0589	41.4743
CELE_W05B2.1	col-94	0.74057	1.43485e-12	1209.64	1299.12	1170.54	1358.64	1971.59	1789.09	2394.63	2263.01
CELE_F38B6.5	col-172	-2.17395	1.4711e-12	97.0455	222.496	108.201	187.146	33.8424	25.9759	39.3084	37.2205
CELE_F22F7.6	bgnt-1.2	-2.93904	1.49441e-12	55.8747	151.702	60.9861	133.937	8.73353	7.57631	16.9982	19.142
CELE_K08F4.7	gst-4	2.48454	1.63843e-12	143.118	57.9226	166.236	55.9602	539.296	481.637	666.118	678.476
CELE_R12A1.3	R12A1.3	-2.40597	1.71109e-12	311.722	790.69	301.979	777.021	78.6018	75.7631	129.612	127.613
CELE_F53C3.12	bcmo-2	0.942021	1.71204e-12	210.755	294.21	207.549	267.875	462.877	452.414	513.134	457.28
CELE_T10E10.4	chtb-3	-2.11943	1.78688e-12	149.979	310.759	147.547	299.983	41.4843	37.8816	63.7434	65.9334
CELE_F27C1.8	dpy-5	1.59839	1.80093e-12	769.502	657.376	784.95	598.132	1767.45	1723.07	2456.24	2560.77
CELE_F14F7.1	col-98	2.19227	1.81734e-12	6305.02	2322.42	6037.62	2259.51	18957.2	18940.8	19942.1	19505.7
CELE_B0222.5	B0222.5	1.10391	1.90806e-12	169.585	123.2	158.367	124.764	277.29	362.581	290.032	306.271
CELE_F58E6.5	F58E6.5	1.16154	2.19164e-12	83.3219	79.9884	104.266	76.1425	159.387	188.325	193.355	226.513
CELE_B0213.6	nlp-31	1.4355	2.39336e-12	350.932	455.106	325.587	421.995	922.479	922.145	1178.19	1180.42
CELE_F32B6.6	msp-77	1.01885	2.5539e-12	432.294	293.291	404.279	293.562	680.124	666.715	791.48	743.346
CELE_C05D12.3	C05D12.3	1.20906	2.74713e-12	813.614	610.486	867.576	543.089	1810.02	1772.86	1479.91	1488.82
CELE_F09F9.2	F09F9.2	-2.35324	2.8181e-12	400.925	842.176	408.213	843.072	78.6018	73.5985	169.982	165.897
CELE_F41F3.8	F41F3.8	-2.65834	2.93592e-12	306.821	694.152	329.521	709.135	45.851	43.2932	126.424	107.408
CELE_F49F1.6	mul-1	1.56521	2.94109e-12	77.4403	144.347	75.7408	133.02	376.634	340.934	281.533	277.559
CELE_C32H11.1	irg-6	2.77582	2.94109e-12	23.5262	36.7763	25.5748	23.8519	299.123	257.595	99.8646	95.7098
CELE_F53C11.3	decr-1.1	0.623636	3.05261e-12	1793.87	1738.6	1654.49	1664.13	2553.47	2567.29	2711.22	2723.48
CELE_Y54F10AM.2	feh-1	-2.10968	3.09685e-12	620.503	1395.66	623.632	1465.06	187.771	188.325	305.968	269.051
CELE_Y6B3B.10	lagr-1	-2.10996	3.12661e-12	188.209	422.008	184.925	427.499	58.9513	63.8575	78.6168	81.8851
CELE_F26B1.8	F26B1.8	1.13236	3.15315e-12	208.795	138.83	178.04	133.02	317.682	321.452	396.271	406.235
CELE_F11A5.9	F11A5.9	0.835248	3.24209e-12	655.792	495.56	646.256	474.285	975.972	986.003	1040.08	1048.55
CELE_W07B8.4	W07B8.4	-2.30457	3.2712e-12	53.9142	97.4571	49.1823	96.3249	16.3754	17.3173	14.8735	11.6979
CELE_F21F8.11	slc-17.5	0.873871	3.48525e-12	116.651	130.556	132.792	122.929	215.063	211.054	233.726	261.607
CELE_F18C5.5	F18C5.5	-2.35587	4.14299e-12	212.716	451.429	245.912	493.55	51.3095	37.8816	95.6151	89.3292
CELE_C52E4.2	mif-2	0.635987	4.1913e-12	609.72	574.629	677.732	637.579	913.746	1007.65	1028.39	933.703
CELE_K01D12.5	K01D12.5	-2.1275	4.39773e-12	112.73	192.156	116.07	234.849	30.5674	27.0583	52.0571	40.4108
CELE_F55H12.4	F55H12.4	1.71162	4.40212e-12	724.41	542.45	660.027	537.585	1435.57	1375.64	2598.6	2660.73
CELE_T19D12.4	T19D12.4	1.14419	4.4409e-12	645.99	1060.08	732.816	1085.26	1935.57	1989.32	1955.86	1911.01
CELE_W02G9.4	W02G9.4	1.04304	4.4409e-12	391.123	536.933	332.472	488.964	950.863	967.603	836.101	852.881
CELE_F54C8.6	F54C8.6	-2.35586	4.50941e-12	311.722	775.06	365.916	806.377	75.3267	75.7631	142.36	147.819
CELE_F53B3.3	F53B3.3	-2.16407	4.57637e-12	221.538	442.235	215.419	407.317	48.0344	48.7049	105.177	85.0754
CELE_F54D8.1	dpy-17	-2.33716	4.83896e-12	16430.1	37771.1	16297	35997.1	3307.82	3542.47	7163.69	7061.26
CELE_Y39G10AR.6	ugt-31	1.64734	4.86024e-12	30.388	22.9852	38.3622	23.8519	76.4184	79.0101	98.8022	106.344
CELE_F59B10.3	F59B10.3	-2.33513	5.07977e-12	161.742	376.957	159.351	399.978	39.3009	45.4579	73.3049	59.5528
CELE_T14B1.1	T14B1.1	-2.28707	5.11281e-12	1003.78	2290.24	942.333	2379.68	262.006	226.207	441.954	425.377
CELE_Y37H2A.13	Y37H2A.13	4.20821	5.12738e-12	1.96051	0.919406	1.96729	3.66952	37.1175	29.2229	38.246	53.1721
CELE_R12B2.8	R12B2.8	-2.16854	5.1982e-12	54.8944	91.9406	54.1005	88.0685	12.0086	10.8233	23.3726	18.0785
CELE_F20D1.7	iglr-1	-2.19832	5.22662e-12	87.2429	194.914	94.43	184.393	18.5588	34.6346	35.0589	34.0302
CELE_C52E4.5	mans-2	0.429748	5.58196e-12	837.14	841.257	832.165	848.577	1165.93	1174.33	1129.32	1056
CELE_T05C1.3	T05C1.3	-2.52863	5.79566e-12	63.7167	139.75	67.8716	136.69	13.1003	10.8233	19.123	27.6495
CELE_Y41E3.2	dpy-4	1.65867	5.96495e-12	1030.25	773.221	1048.57	826.559	2424.65	2338.92	3394.33	3455.12
CELE_F10C5.3	F10C5.3	-2.16259	6.02558e-12	116.651	268.467	121.972	251.362	34.9341	32.4699	48.8699	53.1721
CELE_C54G4.4	C54G4.4	-2.38121	6.12225e-12	174.486	345.697	180.991	369.704	29.4757	33.5522	59.4938	82.9485
CELE_C23H3.2	C23H3.2	0.622761	6.34459e-12	502.872	532.336	603.959	523.824	816.585	789.019	850.974	873.086
CELE_T27E7.1	T27E7.1	0.907888	6.34459e-12	184.288	159.057	211.484	139.442	329.691	314.958	331.466	324.35
CELE_ZK1290.12	wrt-1	-2.51712	6.45364e-12	1179.25	2771.09	1278.74	2757.64	201.963	207.807	473.826	511.516
CELE_C04C11.25	C04C11.25	3.61769	6.5593e-12	0.980257	2.75822	3.93458	3.66952	36.0258	33.5522	29.7469	40.4108
CELE_F59E12.12	bli-2	1.88223	6.57382e-12	103.907	79.9884	118.038	73.3904	267.464	277.077	412.207	425.377
CELE_T06A1.1	T06A1.1	-2.28244	6.72543e-12	90.1837	192.156	90.4954	179.806	19.6504	22.7289	36.1212	35.0936
CELE_Y39A1B.2	ptr-19	-2.34549	6.75011e-12	175.466	387.99	169.187	377.961	38.2092	35.7169	72.2425	72.3141
CELE_W08E12.4	W08E12.4	-2.99668	6.938e-12	54.8944	94.6989	35.4113	97.2423	4.36677	8.65864	9.56151	12.7613
CELE_T13B5.3	pho-14	0.898226	6.94299e-12	1054.76	887.227	1054.47	864.172	1546.93	1556.39	2120.53	1969.5
CELE_K08E7.6	K08E7.6	-2.10991	6.96009e-12	119.591	217.899	104.266	238.519	31.6591	30.3052	44.6204	51.0452
CELE_Y37A1B.7	Y37A1B.7	-2.58843	6.96009e-12	499.931	981.926	390.508	977.927	55.6763	81.1748	158.296	178.658
CELE_T13F2.11	msp-78	1.05066	6.98704e-12	221.538	165.493	205.582	159.624	358.075	377.733	406.895	413.679
CELE_M6.3	pha-2	-2.16906	7.05582e-12	61.7562	118.603	72.7898	127.516	13.1003	18.3996	29.7469	23.3957
CELE_C49G7.7	C49G7.7	2.64514	8.23704e-12	4.90129	5.51644	6.88552	10.0912	48.0344	36.7992	44.6204	42.5377
CELE_T08A9.3	sng-1	-1.924	8.23704e-12	146.058	262.031	125.907	259.619	41.4843	47.6225	64.8058	55.299
CELE_B0261.6	B0261.6	0.989407	8.27088e-12	103.907	82.7466	89.5118	71.5556	164.845	180.749	165.733	177.595
CELE_C14A4.9	C14A4.9	-2.47425	8.27088e-12	397.985	817.352	398.377	884.354	70.9599	64.9398	148.735	164.834
CELE_K08D12.4	K08D12.4	-2.16544	8.27912e-12	151.94	303.404	129.841	251.362	39.3009	27.0583	63.7434	56.3625
CELE_W03B1.3	W03B1.3	-2.24134	8.27912e-12	124.493	272.144	134.76	274.297	33.8424	27.0583	47.8075	61.6797
CELE_K09D9.1	K09D9.1	1.49699	8.49653e-12	46.0721	38.6151	33.444	30.2735	116.811	108.233	113.676	79.7582
CELE_C27B7.9	C27B7.9	1.14355	8.6418e-12	288.196	270.305	296.077	278.884	537.112	465.402	770.232	730.585
CELE_Y58A7A.1	Y58A7A.1	0.862606	8.69666e-12	139.197	147.105	151.482	161.459	289.298	266.253	277.284	257.353
CELE_F28E10.1	F28E10.1	-1.81807	8.73533e-12	640.108	1319.35	676.749	1376.99	236.897	237.03	358.025	306.271
CELE_R13A5.10	R13A5.10	0.963993	8.81638e-12	81.3614	95.6183	88.5282	104.581	167.029	168.844	199.729	187.166
CELE_ZC123.1	ZC123.1	-2.50503	8.83657e-12	1175.33	2808.79	1203	2825.53	210.696	217.548	503.573	479.613
CELE_Y97E10C.1	Y97E10C.1	-2.11332	8.93256e-12	1995.8	4408.55	2073.53	4701.57	599.339	521.683	969.962	954.971
CELE_C02F12.1	tsp-17	-2.28624	8.97125e-12	148.999	349.374	153.449	331.174	41.4843	34.6346	76.492	48.9184
CELE_F56B3.1	col-103	2.13796	9.20636e-12	8370.42	2909.92	7706.87	2996.16	23057.6	23147.8	25169.1	25380.1
CELE_F39D8.4	nas-13	-2.6676	9.43581e-12	53.9142	119.523	53.1169	141.277	9.82522	15.1526	18.0606	14.8882
CELE_R05G9R.1	R05G9R.1	-2.56178	1.02573e-11	210.755	563.596	233.124	466.029	51.3095	28.1406	88.1783	81.8851
CELE_T25D10.2	zig-10	-2.15671	1.03292e-11	186.249	375.118	185.909	399.06	41.4843	47.6225	83.9288	84.012
CELE_F56A6.1	sago-2	1.42328	1.057e-11	145.078	96.5377	160.334	84.399	370.083	356.087	302.781	273.305
CELE_F17E9.11	lys-10	2.1952	1.06833e-11	14.7039	11.0329	12.7874	14.6781	42.576	48.7049	66.9305	85.0754
CELE_B0205.13	B0205.13	2.33474	1.15468e-11	13.7236	11.0329	13.771	10.0912	48.0344	47.6225	89.2407	59.5528
CELE_T28D6.4	T28D6.4	-1.96376	1.17483e-11	485.227	1119.84	539.038	1064.16	167.029	160.185	273.034	222.259
CELE_C24H10.5	cal-5	0.540859	1.18518e-11	774.403	795.287	702.323	836.651	1144.09	1072.59	1215.37	1092.16
CELE_Y60A3A.18	skr-4	0.626947	1.29577e-11	275.452	288.694	285.257	273.379	397.376	413.45	479.138	443.456
CELE_F41F3.3	F41F3.3	-2.32618	1.33374e-11	17418.2	42958.3	16547.9	40892.2	4099.3	4010.03	7721.45	7663.17
CELE_H27M09.4	dpy-14	-2.33915	1.33916e-11	13616.8	31961.3	13554.6	31085.4	2896.26	2856.27	6024.81	6052.05
CELE_Y45F10B.10	qui-1	-2.06058	1.38191e-11	168.604	368.682	172.138	373.374	51.3095	58.4458	66.9305	82.9485
CELE_Y57G11C.39	srlf-27	-2.96715	1.39167e-11	48.0326	78.1495	27.5421	72.473	4.36677	5.41165	7.43673	11.6979
CELE_F20A1.7	twk-11	-2.59932	1.44168e-11	252.906	635.31	277.388	683.448	54.5846	38.9639	111.551	99.9636
CELE_M03E7.4	lrpc-1	-2.73422	1.46801e-11	119.591	295.129	110.168	322.918	16.3754	24.8936	43.558	42.5377
CELE_F22E10.2	pgp-13	1.01128	1.50082e-11	64.697	68.9555	77.708	69.7209	137.553	142.868	132.799	153.136
CELE_F42F12.1	nspc-9	0.539669	1.51872e-11	494.05	540.611	499.692	539.419	731.433	703.515	825.477	755.044
CELE_F28A10.6	acdh-9	0.863547	1.52656e-11	2222.24	1654.93	2087.3	1499	3287.08	3189.63	3449.58	3650.8
CELE_T12B3.2	T12B3.2	1.21226	1.53468e-11	141.157	91.9406	157.383	104.581	296.94	287.9	279.408	280.749
CELE_F49C12.15	F49C12.15	0.853068	1.53468e-11	321.524	262.95	327.554	262.371	459.602	497.872	590.689	571.069
CELE_T24F1.6	tag-180	-1.75958	1.53541e-11	233.301	458.784	236.075	474.285	90.6104	91.9981	110.489	121.232
CELE_T19C9.8	T19C9.8	2.02116	1.57099e-11	25.4867	38.6151	27.5421	31.1909	86.2436	87.6688	156.171	169.087
CELE_ZK180.5	ZK180.5	-2.1833	1.57304e-11	6433.43	14862.2	6311.07	14263.4	1618.98	1588.86	3033.12	2977.64
CELE_R12H7.1	unc-9	-1.88564	1.57427e-11	437.195	890.905	425.919	853.163	147.378	128.797	202.916	226.513
CELE_C14C11.8	pqn-13	-2.3972	1.59631e-11	866.548	1724.81	807.574	2020.07	171.396	147.197	352.713	357.317
CELE_H06A10.1	H06A10.1	1.50321	1.59821e-11	51.9536	32.1792	45.2477	35.7778	132.095	124.468	95.6151	114.852
CELE_T05A7.6	T05A7.6	1.04094	1.60056e-11	99.9863	79.069	101.316	77.9773	168.12	175.338	184.856	207.371
CELE_C05D2.8	C05D2.8	0.766558	1.60591e-11	704.805	521.303	670.847	555.015	1089.51	957.862	1097.45	1024.1
CELE_R148.7	R148.7	1.27834	1.61357e-11	48.0326	34.9374	50.166	42.1995	98.2522	89.8334	111.551	124.423
CELE_Y57A10A.11	rol-1	1.57895	1.63536e-11	479.346	344.777	462.314	386.217	1112.43	1041.2	1357.73	1484.57
CELE_E04F6.4	E04F6.4	-1.20243	1.6467e-11	165.664	206.866	143.612	222.006	65.5015	81.1748	84.9912	89.3292
CELE_C15C8.8	C15C8.8	-3.61581	1.78527e-11	29.4077	69.8749	34.4276	63.2992	2.18338	2.16466	3.18717	8.50754
CELE_F18A11.5	F18A11.5	-1.63517	1.79935e-11	146.058	262.031	149.514	258.701	52.4012	63.8575	76.492	70.1872
CELE_F37A4.3	F37A4.3	-2.49943	1.82067e-11	103.907	208.705	106.234	204.576	15.2837	15.1526	31.8717	47.8549
CELE_ZK1067.7	abu-14	-2.311	1.89111e-11	2914.31	7181.48	3042.42	7429.86	765.276	684.033	1358.8	1336.75
CELE_D1086.11	D1086.11	0.575989	1.9153e-11	2133.04	1785.49	2165.99	1745.77	2947.57	2951.51	2849.33	2921.28
CELE_F57B7.1	dmsr-1	-1.50058	1.91768e-11	226.439	410.055	253.781	411.904	92.7938	107.151	132.799	127.613
CELE_F11G11.12	col-73	1.68732	1.91905e-11	1325.31	1013.19	1286.61	957.745	2970.49	2959.09	4420.6	4407.97
CELE_T25C8.2	act-5	1.02943	1.92829e-11	11746.4	11101.8	11909	11356.2	24705	24349.2	23047.5	22026
CELE_ZK287.4	ZK287.4	-2.08695	1.93341e-11	261.729	506.593	239.026	558.684	65.5015	68.1868	114.738	120.169
CELE_T10A3.1	unc-10	-1.8011	1.97049e-11	407.787	820.111	427.886	855.916	147.378	148.279	219.915	205.244
CELE_F53G2.4	pqn-42	-1.71232	1.99724e-11	210.755	365.004	208.533	371.539	66.5932	73.5985	121.112	91.4561
CELE_F27C1.1	F27C1.1	1.04365	2.01621e-11	287.215	257.434	308.865	211.915	477.069	456.743	624.685	635.939
CELE_W01C9.3	pqn-73	-2.57332	2.03329e-11	913.6	2158.77	987.581	2230.15	155.02	139.621	388.835	373.268
CELE_T01B7.7	rol-6	1.54476	2.08749e-11	165.664	135.153	141.645	126.598	337.333	346.346	482.325	493.437
CELE_F09A5.1	spin-3	1.11857	2.13195e-11	56.8549	68.0361	66.8879	85.3163	155.02	126.633	150.859	170.151
CELE_ZC250.4	ZC250.4	1.01605	2.2088e-11	169.585	205.947	152.465	212.832	423.576	408.039	322.966	345.619
CELE_R07D5.1	unc-7	-2.11782	2.27043e-11	271.531	656.456	287.225	636.662	77.5101	88.7511	125.362	135.057
CELE_ZC513.2	ZC513.2	-2.37919	2.2821e-11	76.4601	182.962	76.7244	171.55	22.9255	17.3173	30.8093	26.5861
CELE_F36D3.4	F36D3.4	1.04479	2.29431e-11	82.3416	60.6808	85.5772	62.3818	135.37	161.267	154.046	147.819
CELE_R13H9.4	msp-53	0.956676	2.29972e-11	546.003	404.539	526.251	355.943	812.218	884.264	906.218	951.781
CELE_Y73B6BL.37	Y73B6BL.37	-3.0963	2.3018e-11	43.1313	91.0212	32.4603	117.425	5.45846	6.49398	10.6239	10.6344
CELE_ZK6.7	lipl-5	0.909125	2.34971e-11	8123.39	5849.26	8017.7	5489.6	13498.8	13459.9	12417.2	12226.4
CELE_ZK354.4	msp-113	0.96535	2.43521e-11	323.485	229.852	314.767	210.08	556.763	501.119	524.82	520.023
CELE_F20B6.2	vha-12	0.50324	2.55572e-11	10479.9	10678	10326.3	10695.7	15571.9	15500.1	14462.3	14252.3
CELE_Y48B6A.8	ace-3	-2.43763	2.62125e-11	386.221	879.872	401.328	819.22	54.5846	82.2571	163.608	158.453
CELE_C33D9.6	C33D9.6	-1.65612	2.88928e-11	610.7	1075.71	579.368	1099.94	205.238	215.384	311.28	336.048
CELE_T06E4.14	idpc-4	-2.25949	3.01877e-11	352.893	990.201	375.753	868.759	109.169	102.821	164.67	163.77
CELE_Y105C5B.15	Y105C5B.15	2.10585	3.05055e-11	1350.79	515.787	1181.36	442.177	4195.37	4102.03	3280.66	3442.36
CELE_B0272.1	tbb-4	-1.9312	3.08846e-11	507.773	902.857	473.134	943.067	115.719	143.95	243.287	238.211
CELE_BE10.2	agmo-1	-2.13025	3.12013e-11	438.175	921.245	419.033	870.594	91.7021	114.727	189.105	209.498
CELE_T26A8.2	tmem-231	-2.35943	3.12013e-11	61.7562	133.314	59.0188	125.681	19.6504	11.9056	15.9358	26.5861
CELE_M153.3	M153.3	-3.1664	3.12013e-11	29.4077	84.5854	44.2641	72.473	3.27507	3.24699	9.56151	9.57098
CELE_C15C6.1	C15C6.1	-2.08179	3.18662e-11	392.103	917.568	427.886	916.463	109.169	124.468	182.731	210.562
CELE_C18A3.6	rab-3	-1.95595	3.23833e-11	401.906	935.036	427.886	889.859	144.103	132.044	208.228	199.927
CELE_W03D8.9	W03D8.9	0.912326	3.32853e-11	290.156	202.269	310.832	236.684	445.41	476.225	516.321	516.833
CELE_H04M03.4	glf-1	-2.47211	3.48569e-11	1452.74	3556.26	1452.85	3418.16	274.015	259.759	633.184	613.606
CELE_R05F9.8	msp-33	0.947555	3.55183e-11	581.293	392.587	584.286	411.904	926.846	892.922	981.648	995.382
CELE_T16G12.1	T16G12.1	0.83997	3.69524e-11	974.376	1001.23	1160.7	966.919	2011.99	2004.48	1665.83	1662.16
CELE_C01B12.1	sqt-2	1.91082	3.81712e-11	194.091	159.057	209.517	158.707	448.685	466.484	912.593	883.721
CELE_F20D12.3	bbs-2	-2.33553	3.81712e-11	74.4996	133.314	62.9534	134.855	13.1003	16.235	27.6221	23.3957
CELE_C05D10.2	mapk-15	-1.88298	3.83047e-11	177.427	342.019	150.498	290.809	49.1261	51.9519	83.9288	75.5044
CELE_F48A11.1	chs-2	-1.96116	3.88587e-11	514.635	1099.61	510.512	1080.67	160.479	149.362	248.599	264.797
CELE_F22D6.10	col-60	1.02363	3.90182e-11	340.149	312.598	335.423	281.636	660.473	627.752	618.311	674.223
CELE_R193.2	R193.2	1.29447	3.97057e-11	224.479	239.965	292.143	226.593	467.244	504.366	737.298	701.872
CELE_C06G1.2	cpg-19	-2.37842	4.06829e-11	128.414	283.177	130.825	292.644	24.0172	25.9759	50.9947	59.5528
CELE_M88.1	ugt-62	1.38178	4.07205e-11	938.106	581.065	947.251	521.989	1708.5	1644.06	2190.65	2241.74
CELE_ZK1010.1	ubq-2	0.269625	4.15413e-11	12575.7	12437.7	13562.5	13184.6	15815.3	15509.8	15707.4	15363.6
CELE_T03F6.1	qdpr-1	0.516456	4.41787e-11	1370.4	1249.47	1428.25	1323.78	2039.28	1940.62	1853.87	1849.33
CELE_W10C8.4	W10C8.4	-1.71284	4.47295e-11	70.5785	108.49	66.8879	109.168	28.384	23.8113	31.8717	24.4592
CELE_F37B1.1	gst-24	1.03465	4.60621e-11	82.3416	88.263	74.7571	99.9944	176.854	198.066	176.357	157.389
CELE_C05B5.2	C05B5.2	1.15897	4.60621e-11	116.651	75.3913	88.5282	84.399	163.754	194.819	234.788	220.133
CELE_K08C7.4	K08C7.4	-2.44014	4.73938e-11	76.4601	165.493	74.7571	171.55	15.2837	14.0703	27.6221	32.9667
CELE_Y53F4B.33	gst-39	0.872477	4.76807e-11	159.782	169.171	154.432	177.972	290.39	258.677	327.216	334.984
CELE_Y41D4B.6	Y41D4B.6	-2.1404	4.76807e-11	298.979	668.408	291.159	645.836	91.7021	64.9398	129.612	145.692
CELE_K07F5.2	msp-10	1.0642	4.7857e-11	157.821	109.409	127.874	110.086	249.997	245.689	294.282	264.797
CELE_W04C9.3	cutl-13	-2.46397	4.83004e-11	149.979	308.921	120.988	335.761	21.8338	32.4699	57.369	54.2356
CELE_T23F4.3	dlhd-1	-2.36663	4.89006e-11	34.309	61.6002	42.2968	66.0514	4.36677	5.41165	14.8735	14.8882
CELE_F30A10.2	F30A10.2	-2.5022	4.93236e-11	189.19	446.832	209.517	464.194	36.0258	31.3876	82.8664	80.8216
CELE_R02F11.1	R02F11.1	-2.45023	5.12154e-11	1054.76	2478.72	1073.16	2480.6	185.588	201.313	463.202	446.646
CELE_F43D2.6	F43D2.6	0.73581	5.13675e-11	333.288	298.807	309.849	301.818	455.235	495.707	542.881	576.386
CELE_K09H11.1	acds-10	0.625703	5.14141e-11	568.549	487.285	569.531	498.137	818.769	799.842	842.475	813.534
CELE_Y75B8A.5	lron-12	-2.11035	5.15638e-11	157.821	388.909	177.056	364.2	41.4843	62.7752	76.492	71.2507
CELE_C01B10.5	hil-7	-2.34855	5.34868e-11	2630.03	5609.3	2576.17	5807.02	498.903	482.719	1212.19	1069.82
CELE_F56D12.1	alh-6	0.344505	5.4794e-11	2213.42	2109.12	2130.58	2175.11	2873.33	2784.84	2664.47	2633.08
CELE_ZC374.2	ZC374.2	-1.94835	5.5299e-11	427.392	895.502	406.246	893.528	124.453	134.209	207.166	213.752
CELE_ZK265.8	cutl-8	-2.40795	5.58721e-11	115.67	221.577	82.6263	233.932	20.7421	21.6466	41.4332	39.3474
CELE_W02B8.5	hot-3	-2.30089	5.58721e-11	61.7562	150.783	59.0188	124.764	15.2837	21.6466	23.3726	20.2054
CELE_ZK896.6	clec-187	1.31524	5.63107e-11	225.459	158.138	231.157	136.69	538.204	548.741	383.523	397.728
CELE_F35D2.2	F35D2.2	-2.08143	5.76358e-11	49.9931	79.069	62.9534	98.1597	9.82522	12.988	21.2478	24.4592
CELE_Y38H8A.3	ttbk-8.1	0.941979	5.84842e-11	100.967	102.054	83.6099	102.747	163.754	185.078	189.105	210.562
CELE_Y59E9AL.6	cylc-1	1.02334	5.91285e-11	135.276	103.893	133.776	118.342	204.146	242.442	264.535	286.066
CELE_F57G12.2	F57G12.2	-2.38546	5.92228e-11	81.3614	159.057	78.6917	173.385	18.5588	10.8233	30.8093	34.0302
CELE_F10F2.3	lips-3	-2.08442	5.93104e-11	281.334	645.423	269.519	566.941	73.1433	77.9278	130.674	133.994
CELE_C39E9.3	col-131	-2.43043	6.06186e-11	87.2429	191.237	92.4627	188.98	17.4671	14.0703	30.8093	41.4743
CELE_Y41G9A.1	osm-5	-1.79294	6.3115e-11	142.137	193.075	108.201	199.071	38.2092	27.0583	57.369	62.7431
CELE_F55G1.1	F55G1.1	-2.53822	6.44753e-11	65.6773	146.186	61.9697	118.342	13.1003	10.8233	20.1854	23.3957
CELE_R07E3.3	cut-5	-2.60807	6.49725e-11	192.13	412.813	175.089	413.738	30.5674	21.6466	63.7434	79.7582
CELE_F42E11.4	tni-1	-1.99641	6.525e-11	1582.14	3788.87	1705.64	3623.65	490.169	521.683	777.669	892.228
CELE_F54C9.3	F54C9.3	0.588715	6.55727e-11	503.852	601.292	541.989	634.827	828.594	834.477	879.659	891.165
CELE_F48C1.1	aman-3	0.912163	6.62178e-11	87.2429	103.893	91.4791	104.581	165.937	192.655	189.105	181.849
CELE_K06A4.4	swt-5	-2.64925	6.63613e-11	106.848	258.353	105.25	241.271	17.4671	14.0703	40.3708	41.4743
CELE_T22B3.2	alg-3	1.11586	6.64174e-11	151.94	111.248	125.907	98.1597	247.814	222.96	275.159	308.398
CELE_C33G3.3	lgc-21	-1.71785	6.68429e-11	315.643	691.394	349.194	652.257	123.361	149.362	178.481	159.516
CELE_ZK381.2	ZK381.2	-3.05679	6.70194e-11	42.1511	125.039	53.1169	109.168	3.27507	6.49398	14.8735	14.8882
CELE_K04B12.1	plx-2	-2.0636	6.8212e-11	764.601	1718.37	749.538	1682.47	231.439	200.231	330.403	413.679
CELE_K08F8.7	K08F8.7	-2.58271	6.83933e-11	54.8944	105.732	60.9861	131.185	8.73353	8.65864	25.4973	15.9516
CELE_F01D5.3	F01D5.3	2.73245	6.90432e-11	60.776	42.2927	59.0188	39.4473	417.026	406.956	283.658	230.767
CELE_F42G9.9	ptl-1	-1.8234	7.07274e-11	412.688	896.421	422.968	864.172	148.47	151.526	233.726	199.927
CELE_K10D6.2	clc-6	-1.91075	7.15525e-11	924.383	1700.9	832.165	1665.96	235.805	241.36	477.013	408.362
CELE_F23H12.4	sqt-3	-2.32317	7.20117e-11	24360.4	58491.7	23682.3	57847.2	5351.47	5203.84	11007.4	11285.3
CELE_C52D10.13	col-138	1.63669	7.4126e-11	867.528	602.211	786.917	599.967	1887.53	1891.91	2562.48	2539.5
CELE_Y44E3A.1	Y44E3A.1	-1.31354	7.43249e-11	162.723	233.529	155.416	199.989	58.9513	63.8575	94.5527	85.0754
CELE_F09F7.8	nspb-12	-2.27353	7.50681e-11	109.789	257.434	110.168	248.61	37.1175	22.7289	40.3708	49.9818
CELE_Y57G11A.2	Y57G11A.2	0.86253	7.5128e-11	291.136	245.482	292.143	236.684	468.336	439.426	534.382	493.437
CELE_F07G6.10	F07G6.10	1.64619	7.61795e-11	80.3811	43.2121	66.8879	35.7778	177.946	175.338	178.481	174.405
CELE_C27A2.8	C27A2.8	-2.91843	7.6811e-11	59.7957	115.845	57.0515	131.185	3.27507	6.49398	19.123	19.142
CELE_T22B11.2	bus-4	-2.05091	7.6811e-11	169.585	388.909	188.86	344.935	52.4012	41.1286	88.1783	81.8851
CELE_K09F5.6	K09F5.6	-1.7731	7.6811e-11	799.89	1621.83	829.214	1726.51	298.032	282.488	443.016	432.821
CELE_F25D1.5	F25D1.5	1.09088	7.90873e-11	125.473	82.7466	123.939	111.92	269.648	252.183	213.54	209.498
CELE_C27A7.2	C27A7.2	-3.28488	7.94413e-11	30.388	68.0361	42.2968	67.8861	0	3.24699	8.49912	9.57098
CELE_F44G3.6	skr-3	0.562943	7.94413e-11	557.767	659.214	557.727	655.009	895.187	956.78	879.659	860.325
CELE_R11G11.7	srlf-35	1.65369	8.06847e-11	25.4867	19.3075	25.5748	17.4302	77.5101	68.1868	75.4297	54.2356
CELE_ZK287.1	ZK287.1	-2.29299	8.06847e-11	783.226	1659.53	732.816	1734.77	165.937	146.115	337.84	351.999
CELE_F33H12.7	F33H12.7	2.39694	8.09291e-11	15.6841	17.4687	28.5257	22.9345	70.9599	63.8575	154.046	156.326
CELE_Y69A2AL.2	Y69A2AL.2	0.992607	8.10317e-11	400.925	616.002	466.248	647.67	1180.12	1072.59	1034.77	954.971
CELE_T04H1.6	lrx-1	-1.99254	8.10317e-11	89.2034	207.786	109.185	212.832	32.7507	37.8816	42.4956	42.5377
CELE_F41A4.1	cutl-28	-2.23783	8.14248e-11	333.288	749.316	349.194	719.226	70.9599	71.4338	154.046	159.516
CELE_C36H8.2	inx-6	-2.02348	8.18312e-11	331.327	662.892	270.503	648.588	85.1519	97.4097	131.736	156.326
CELE_ZC84.6	ZC84.6	-2.2871	8.50911e-11	142.137	335.583	146.563	337.596	33.8424	32.4699	69.0553	61.6797
CELE_C09G5.8	mks-5	-2.37115	8.56065e-11	113.71	250.079	115.087	246.775	24.0172	18.3996	46.7451	51.0452
CELE_K01A2.11	cbn-1	-2.22519	8.59859e-11	313.682	747.477	355.096	706.383	69.8683	77.9278	160.421	145.692
CELE_Y42H9B.1	col-115	-2.09366	8.59859e-11	286.235	692.313	291.159	670.605	93.8855	82.2571	148.735	129.74
CELE_C06E4.2	C06E4.2	-1.71569	8.64675e-11	92.1442	159.977	82.6263	147.698	32.7507	29.2229	45.6828	39.3474
CELE_Y27F2A.3	sri-40	0.905109	8.76438e-11	769.502	511.19	692.487	521.989	1185.58	1273.9	1096.39	1114.49
CELE_F35D2.3	F35D2.3	-1.79126	8.76438e-11	665.595	1320.27	658.059	1318.28	206.33	230.536	347.401	360.507
CELE_C14A11.2	C14A11.2	-2.54905	9.0442e-11	109.789	262.031	90.4954	245.858	18.5588	20.5643	42.4956	39.3474
CELE_F40E10.4	slt-1	-1.99669	9.0442e-11	423.471	905.615	437.723	858.668	125.545	106.068	203.979	222.259
CELE_C35B1.4	C35B1.4	1.08806	9.2106e-11	636.187	387.07	562.646	406.399	980.339	955.698	1214.31	1082.58
CELE_Y51H7C.13	Y51H7C.13	1.60572	9.35529e-11	380.34	240.884	362.965	291.727	777.284	753.302	1120.82	1230.4
CELE_R04B3.3	R04B3.3	-2.33987	9.38865e-11	138.216	321.792	153.449	286.223	28.384	24.8936	58.4314	65.9334
CELE_C27A7.5	C27A7.5	0.44106	9.60476e-11	672.457	742.88	750.522	740.326	1005.45	1007.65	979.523	953.908
CELE_F53C3.3	F53C3.3	-2.09794	9.90857e-11	105.868	220.658	98.3646	217.419	26.2006	31.3876	48.8699	43.6011
CELE_F47A4.3	rrc-1	-1.9735	1.00086e-10	306.821	650.94	306.898	658.679	91.7021	88.7511	165.733	143.565
CELE_Y45F10D.13	sorb-1	-1.90024	1.09761e-10	423.471	934.117	431.821	997.192	155.02	152.609	231.601	207.371
CELE_M01E10.2	dpy-1	-2.63092	1.14245e-10	554.826	1278.89	508.545	1254.06	70.9599	81.1748	211.416	216.942
CELE_K09E10.2	oac-58	1.93651	1.18296e-10	18.6249	10.1135	27.5421	11.9259	76.4184	62.7752	55.2443	64.87
CELE_T26H5.10	T26H5.10	2.30185	1.18442e-10	9.80257	7.35525	6.88552	8.25642	41.4843	45.4579	41.4332	30.8398
CELE_B0304.3	cyp-23A1	-2.13665	1.212e-10	49.0129	107.571	60.9861	117.425	21.8338	16.235	19.123	19.142
CELE_C06E1.4	glr-1	-2.14346	1.212e-10	89.2034	163.654	73.7735	161.459	29.4757	15.1526	25.4973	40.4108
CELE_Y67H2A.5	kdp-1	0.354469	1.21229e-10	7401.92	6918.53	7219.96	6584.95	9065.41	9129.46	8669.1	9092.43
CELE_R74.2	R74.2	-2.37265	1.2146e-10	541.102	1170.4	465.265	1137.55	98.2522	93.0804	220.977	227.577
CELE_C33A12.4	C33A12.4	-1.75221	1.21949e-10	206.834	400.861	175.089	374.291	86.2436	69.2691	99.8646	88.2657
CELE_K10D11.3	K10D11.3	1.5231	1.24377e-10	44.1116	60.6808	48.1987	55.0428	168.12	195.902	134.923	99.9636
CELE_JC8.12	bus-12	-2.30486	1.26662e-10	114.69	251.917	92.4627	250.445	22.9255	31.3876	44.6204	44.6646
CELE_C42C1.2	ppm-1.H	-2.36371	1.29157e-10	58.8154	114.006	57.0515	117.425	12.0086	9.74097	25.4973	20.2054
CELE_C15C8.2	cky-1	-2.56782	1.29387e-10	99.9863	218.819	107.217	214.667	15.2837	11.9056	44.6204	36.157
CELE_C17H12.14	vha-8	0.5184	1.32293e-10	8014.59	7923.44	8045.24	8396.78	12098.1	11948.9	11502.5	10831.2
CELE_F57B9.9	abu-13	-2.0464	1.34129e-10	754.798	1542.76	757.408	1612.75	204.146	177.502	362.275	386.03
CELE_C49C3.1	snf-9	0.912034	1.3477e-10	362.695	256.514	368.867	279.801	647.373	636.41	573.69	526.404
CELE_C39H7.1	ttbk-8.2	1.03822	1.35094e-10	224.479	172.848	207.549	133.02	364.625	337.687	414.332	396.664
CELE_Y43F8C.13	Y43F8C.13	0.633755	1.36024e-10	678.338	513.948	662.978	558.684	941.038	951.368	948.714	901.799
CELE_K08D12.6	epic-2	1.66804	1.36532e-10	6691.24	2974.28	6332.71	3018.18	14205.1	13915.5	16855.9	15451.8
CELE_T19D7.3	lpr-7	-2.15592	1.37209e-10	201.933	410.975	182.958	416.491	44.7593	46.5402	84.9912	95.7098
CELE_Y47D7A.13	Y47D7A.13	-1.9363	1.42127e-10	5313.98	12838.6	5090.37	12726.8	1956.31	1991.49	2722.9	2727.73
CELE_F17C8.3	F17C8.3	-1.80848	1.47449e-10	108.809	203.189	100.332	200.906	48.0344	44.3755	43.558	39.3474
CELE_E03A3.6	unc-79	-1.67822	1.48894e-10	256.827	522.223	268.535	490.798	105.894	102.821	130.674	141.438
CELE_C35A5.10	C35A5.10	-2.144	1.49373e-10	64.697	126.878	73.7735	146.781	20.7421	14.0703	27.6221	30.8398
CELE_C45B2.1	C45B2.1	2.3541	1.49373e-10	685.2	235.368	650.19	205.493	1886.44	1920.05	2590.11	2682
CELE_F54F3.3	lipl-1	-1.17647	1.49429e-10	509.734	671.167	548.875	666.935	320.957	306.299	207.166	226.513
CELE_R11A8.3	ugt-59	-2.56797	1.49811e-10	31.3682	60.6808	33.444	52.2907	3.27507	6.49398	9.56151	10.6344
CELE_W10D5.2	nduf-7	0.27009	1.54058e-10	3155.45	3128.74	3172.26	3159.46	3873.32	3925.61	3786.36	3628.47
CELE_Y38F1A.3	ptr-18	-2.10775	1.60437e-10	769.502	1740.44	794.786	1661.38	185.588	196.984	386.71	382.839
CELE_C37A5.2	fipr-22	1.80051	1.6129e-10	53.9142	84.5854	61.9697	57.7949	152.837	176.42	295.344	275.432
CELE_F01E11.3	F01E11.3	-2.0677	1.63303e-10	66.6575	148.024	83.6099	137.607	15.2837	28.1406	27.6221	32.9667
CELE_F20C5.6	F20C5.6	-1.69329	1.63445e-10	755.779	1460.02	775.113	1456.8	257.639	270.583	445.141	401.981
CELE_F07A5.4	F07A5.4	-2.1963	1.64221e-10	103.907	249.159	131.809	236.684	28.384	22.7289	55.2443	51.0452
CELE_T07F10.4	bus-19	-1.92128	1.67347e-10	408.767	918.487	425.919	934.81	134.278	140.703	216.727	218.006
CELE_ZC449.2	ZC449.2	-2.3523	1.69426e-10	201.933	471.656	202.631	413.738	42.576	32.4699	94.5527	82.9485
CELE_F08A8.1	acox-1.1	0.761897	1.72478e-10	856.745	759.43	904.954	786.195	1424.66	1417.85	1361.98	1402.68
CELE_C24H10.3	C24H10.3	-2.57327	1.72967e-10	61.7562	123.2	66.8879	130.268	5.45846	10.8233	20.1854	27.6495
CELE_C40C9.2	acr-9	-2.78985	1.81777e-10	27.4472	83.666	45.2477	73.3904	6.55015	6.49398	11.6863	8.50754
CELE_F58A4.11	gei-13	-2.2067	1.82125e-10	1697.81	3600.4	1628.92	3915.38	383.184	365.828	768.108	831.612
CELE_D1025.4	nspc-20	0.549471	1.84492e-10	394.064	421.088	421.984	397.226	565.496	598.529	590.689	637.002
CELE_ZK354.1	msp-65	0.901804	1.92855e-10	344.07	243.643	310.832	226.593	543.662	485.966	576.878	493.437
CELE_F47G9.3	cutl-18	-2.12688	1.94876e-10	154.881	259.273	157.383	260.536	21.8338	34.6346	77.5544	56.3625
CELE_F56D6.2	clec-67	1.50974	1.95385e-10	373.478	694.152	329.521	709.135	1659.37	1607.26	1355.61	1378.22
CELE_F31D4.5	F31D4.5	-2.62256	1.95828e-10	658.733	1385.55	637.403	1465.97	93.8855	71.4338	263.473	244.592
CELE_F57B1.4	col-160	1.54516	1.97711e-10	10253.5	4786.43	10080.4	5083.2	20701.7	20201.7	23806	23433
CELE_F13H10.9	F13H10.9	-1.82437	1.98922e-10	50.9734	51.4868	41.3131	61.4645	13.1003	17.3173	10.6239	17.0151
CELE_F16B3.1	egl-2	-1.81533	1.99021e-10	145.078	284.097	144.596	275.214	50.2178	44.3755	63.7434	82.9485
CELE_ZK1251.6	msp-76	1.00554	1.99619e-10	636.187	451.429	645.272	455.02	1015.27	966.521	1193.06	1215.51
CELE_T16G1.2	T16G1.2	-2.30953	2.00259e-10	183.308	399.022	194.762	454.103	38.2092	38.9639	83.9288	87.2023
CELE_C44H9.7	C44H9.7	-2.15265	2.01023e-10	137.236	247.32	113.119	255.032	31.6591	27.0583	54.1819	56.3625
CELE_C48B4.2	rom-2	-2.33518	2.04331e-10	53.9142	105.732	51.1496	119.259	10.9169	19.4819	21.2478	13.8248
CELE_Y1H11.2	gst-35	1.1913	2.06e-10	42.1511	57.9226	42.2968	44.0342	94.9772	98.4921	112.613	120.169
CELE_F54F7.2	F54F7.2	1.67628	2.10395e-10	263.689	113.087	267.552	135.772	685.582	614.764	605.562	584.893
CELE_C17H12.3	C17H12.3	0.950294	2.11685e-10	62.7365	69.8749	86.5609	69.7209	138.645	135.291	138.111	145.692
CELE_B0511.5	cutl-14	-2.21221	2.14469e-10	100.967	269.386	106.234	264.205	33.8424	37.8816	38.246	49.9818
CELE_R07E5.17	R07E5.17	-2.38121	2.16057e-10	40.1906	95.6183	42.2968	78.8947	15.2837	7.57631	12.7487	13.8248
CELE_W01B6.1	cwn-2	-1.72104	2.27329e-10	348.972	604.969	326.571	644.918	103.711	112.562	189.105	178.658
CELE_F15B9.7	fmi-1	-2.133	2.29266e-10	1108.67	2535.72	1052.5	2471.42	269.648	283.571	534.382	546.609
CELE_R13H9.2	msp-57	1.0325	2.31882e-10	761.66	549.805	715.111	485.294	1205.23	1134.28	1477.78	1318.67
CELE_F20C5.11	F20C5.11	-1.63568	2.35904e-10	271.531	575.548	314.767	605.471	127.728	123.386	161.483	156.326
CELE_F26A3.6	del-3	-2.62501	2.45297e-10	65.6773	153.541	64.9206	165.128	13.1003	9.74097	22.3102	27.6495
CELE_T10H4.11	cyp-34A2	-1.7888	2.45297e-10	113.71	266.628	134.76	249.527	62.2264	51.9519	44.6204	62.7431
CELE_F58G6.4	acc-1	-2.39723	2.55385e-10	41.1708	117.684	60.9861	90.8206	15.2837	8.65864	21.2478	13.8248
CELE_F40H3.4	fkh-8	-1.7873	2.5811e-10	91.1639	205.028	109.185	172.467	44.7593	32.4699	50.9947	39.3474
CELE_F58E6.11	F58E6.11	-1.98277	2.58733e-10	62.7365	115.845	67.8716	100.912	19.6504	11.9056	25.4973	30.8398
CELE_K07F5.5	nspd-2	0.967567	2.61806e-10	272.512	180.204	271.486	183.476	403.926	444.838	456.828	466.851
CELE_Y73F8A.5	Y73F8A.5	-2.03338	2.61806e-10	182.328	403.619	189.844	417.408	51.3095	57.3635	103.052	79.7582
CELE_F53B7.7	F53B7.7	1.79761	2.64859e-10	28.4275	40.4539	24.5912	44.9516	85.1519	101.739	141.298	154.199
CELE_F41G3.12	agr-1	-2.04915	2.65056e-10	450.918	1047.2	431.821	1001.78	133.186	127.715	229.476	218.006
CELE_B0228.6	B0228.6	-1.44854	2.65093e-10	481.306	829.305	462.314	785.277	179.037	204.56	260.285	293.51
CELE_K08E7.9	pgp-1	1.12203	2.65093e-10	480.326	577.387	488.872	621.066	995.623	932.969	1398.1	1392.05
CELE_D2062.6	msrp-6	1.36831	2.67994e-10	49.0129	23.9046	36.3949	34.8604	99.3439	95.2451	93.4903	82.9485
CELE_F58G6.6	del-2	-2.28132	2.85956e-10	86.2627	188.478	74.7571	166.046	19.6504	16.235	32.9341	37.2205
CELE_C16C8.2	skpo-2	-2.65958	2.86718e-10	478.366	1254.07	479.036	1254.98	76.4184	69.2691	200.792	202.054
CELE_EGAP4.1	EGAP4.1	-3.13573	2.95235e-10	35.2893	140.669	44.2641	128.433	7.64184	8.65864	14.8735	8.50754
CELE_Y106G6G.4	Y106G6G.4	0.86575	2.96186e-10	133.315	119.523	140.661	145.863	223.797	215.384	279.408	263.734
CELE_C03G6.13	tag-293	-3.03079	3.05001e-10	24.5064	34.9374	37.3786	34.8604	4.36677	4.32932	3.18717	4.25377
CELE_Y11D7A.14	nmy-3	-1.55249	3.06207e-10	130.374	225.255	110.168	201.824	55.6763	60.6105	57.369	54.2356
CELE_Y53F4B.25	Y53F4B.25	-2.51937	3.13505e-10	143.118	340.18	149.514	373.374	26.2006	23.8113	69.0553	56.3625
CELE_C33D9.5	C33D9.5	-1.75952	3.16811e-10	253.887	473.494	258.699	432.086	67.6849	79.0101	134.923	137.184
CELE_F26G1.9	F26G1.9	-2.62024	3.16819e-10	26.467	55.1644	31.4767	44.9516	3.27507	7.57631	7.43673	7.4441
CELE_W01C8.5	W01C8.5	-1.13984	3.16819e-10	1245.91	1879.27	1179.39	1843.93	615.714	596.364	819.102	759.298
CELE_C30A5.7	unc-86	-2.08327	3.17207e-10	226.439	498.318	236.075	523.824	68.7766	53.0342	118.988	109.535
CELE_C37H5.9	nas-9	0.643776	3.1726e-10	370.537	471.656	359.031	413.738	608.072	629.916	606.624	680.603
CELE_Y38H6A.3	Y38H6A.3	-3.36011	3.22041e-10	23.5262	73.5525	28.5257	61.4645	3.27507	4.32932	4.24956	6.38066
CELE_F18E9.1	F18E9.1	-2.26518	3.4736e-10	72.5391	133.314	60.0024	151.368	12.0086	21.6466	24.435	28.7129
CELE_ZK546.6	msp-152	0.872914	3.63901e-10	592.076	426.605	554.776	394.473	880.995	861.535	942.34	916.687
CELE_Y47D3B.6	idpc-1	-2.00146	3.67778e-10	1179.25	2884.18	1191.2	2964.05	420.301	395.051	563.066	674.223
CELE_T23D8.8	cfi-1	-1.78103	3.70909e-10	255.847	552.563	265.584	588.958	103.711	104.986	129.612	145.692
CELE_R02F2.2	osg-1	-1.72357	3.71101e-10	351.912	711.621	361.982	663.266	127.728	113.645	208.228	182.912
CELE_C30A5.10	C30A5.10	-2.814	3.84829e-10	65.6773	170.09	56.0678	175.22	13.1003	8.65864	25.4973	19.142
CELE_W02D7.11	W02D7.11	-4.67873	3.86541e-10	29.4077	71.7137	23.6075	94.4901	0	0	4.24956	4.25377
CELE_F38E11.2	hsp-12.6	-3.52452	3.88052e-10	30.388	188.478	45.2477	155.955	9.82522	7.57631	10.6239	8.50754
CELE_C17C3.15	C17C3.15	1.51333	3.88284e-10	65.6773	41.3733	52.1332	30.2735	125.545	125.55	137.048	151.009
CELE_C32E12.3	osr-1	-2.21557	3.95998e-10	181.348	419.249	202.631	430.251	48.0344	36.7992	95.6151	85.0754
CELE_C54D10.3	C54D10.3	0.4235	3.98662e-10	827.337	936.875	850.854	877.933	1147.37	1144.02	1220.69	1174.04
CELE_T13F2.9	T13F2.9	1.07112	4.00441e-10	236.242	161.816	252.797	163.294	364.625	423.191	502.51	417.933
CELE_K07C6.5	cyp-35A5	1.42976	4.15574e-10	350.932	227.093	384.606	178.889	791.476	862.617	693.74	725.268
CELE_F13A7.1	F13A7.1	0.95942	4.40701e-10	123.512	100.215	154.432	117.425	217.247	216.466	275.159	253.099
CELE_T01B7.8	idpb-4	-2.07383	4.56273e-10	75.4798	159.977	73.7735	146.781	26.2006	19.4819	35.0589	27.6495
CELE_Y38H6A.5	Y38H6A.5	-2.08306	4.56273e-10	62.7365	151.702	66.8879	122.929	20.7421	18.3996	25.4973	30.8398
CELE_Y43F8B.3	Y43F8B.3	-2.19936	4.64969e-10	552.865	1460.94	596.09	1473.31	150.653	159.103	303.843	275.432
CELE_F45D3.3	F45D3.3	0.599713	4.65658e-10	662.654	713.459	648.223	714.639	1140.82	1144.02	935.965	931.576
CELE_H17B01.2	H17B01.2	2.30513	4.69559e-10	18.6249	9.19406	12.7874	11.0086	49.1261	44.3755	71.1801	89.3292
CELE_Y41G9A.10	Y41G9A.10	1.44474	4.72166e-10	76.4601	85.5048	74.7571	86.2337	179.037	169.926	268.785	261.607
CELE_R03E1.2	vha-20	0.525065	4.73361e-10	3295.63	3741.98	3187.01	3670.44	5124.4	5195.19	4985.79	4691.91
CELE_F53B6.2	madd-4	-1.80942	4.75903e-10	398.965	809.078	347.227	801.79	123.361	159.103	186.981	203.118
CELE_T13C2.2	T13C2.2	-2.33785	4.78475e-10	103.907	252.837	94.43	220.171	19.6504	24.8936	42.4956	45.728
CELE_Y53F4B.20	Y53F4B.20	-1.97142	4.81071e-10	109.789	245.482	108.201	188.063	36.0258	25.9759	50.9947	53.1721
CELE_T03F7.1	snf-11	-2.02443	4.81071e-10	516.596	1230.17	482.97	1114.62	161.57	142.868	275.159	242.465
CELE_T27C10.7	nspd-10	1.20992	4.94897e-10	88.2232	74.4719	104.266	58.7123	157.204	190.49	189.105	214.815
CELE_T02E9.5	T02E9.5	-1.62894	4.9784e-10	1682.12	3095.64	1638.75	2978.73	596.064	541.165	938.09	962.416
CELE_F57B7.2	F57B7.2	-1.74832	5.02494e-10	206.834	416.491	193.778	364.2	68.7766	67.1045	104.114	111.661
CELE_F45B8.4	pag-3	-2.18363	5.02494e-10	73.5193	173.768	73.7735	155.955	15.2837	24.8936	31.8717	32.9667
CELE_Y37E11AL.6	fmil-1	-1.96426	5.17556e-10	316.623	659.214	306.898	677.944	90.6104	86.5864	162.546	162.707
CELE_C27H6.1	unc-41	-1.97481	5.33488e-10	378.379	852.29	370.835	888.941	126.636	115.809	184.856	206.308
CELE_Y53F4B.39	Y53F4B.39	0.447682	5.38422e-10	1157.68	1072.95	1199.06	1000.86	1509.81	1480.63	1513.91	1535.61
CELE_F56H1.1	che-14	-1.6103	5.38677e-10	164.683	296.968	168.203	322.918	64.4098	64.9398	89.2407	93.5829
CELE_C46H11.9	phat-2	-2.10584	5.40212e-10	256.827	519.465	254.764	517.402	61.1347	50.8695	120.05	127.613
CELE_ZK757.3	alg-4	0.985542	5.56204e-10	176.446	136.072	171.154	126.598	269.648	260.842	332.528	343.492
CELE_F32B5.2	F32B5.2	-2.07815	5.56389e-10	79.4009	149.863	72.7898	141.277	13.1003	25.9759	31.8717	34.0302
CELE_K04H4.2	chtb-1	-2.32998	5.58525e-10	2691.79	6157.26	2718.8	6338.18	518.553	506.531	1279.12	1256.99
CELE_F54E4.3	F54E4.3	-1.59395	5.62536e-10	343.09	752.994	381.655	676.109	156.112	149.362	208.228	199.927
CELE_F14B4.1	F14B4.1	-1.90208	5.63383e-10	747.936	1666.88	870.527	1510.01	219.43	213.219	429.205	421.123
CELE_T21D12.7	T21D12.7	-2.16149	5.63976e-10	89.2034	171.929	76.7244	165.128	16.3754	19.4819	36.1212	40.4108
CELE_F48C5.2	F48C5.2	-1.70591	5.72698e-10	70.5785	132.395	88.5282	124.764	25.1089	29.2229	37.1836	36.157
CELE_T25G12.6	T25G12.6	1.19281	5.76176e-10	154.881	94.6989	157.383	109.168	319.866	324.699	263.473	270.114
CELE_F18C5.9	F18C5.9	-2.37056	5.77331e-10	44.1116	74.4719	42.2968	66.0514	3.27507	6.49398	19.123	14.8882
CELE_B0218.8	clec-52	1.19752	5.77331e-10	284.275	397.184	276.405	420.16	934.488	953.533	644.87	629.558
CELE_T16G1.1	pqn-67	-1.64796	5.83413e-10	108.809	210.544	114.103	201.824	42.576	46.5402	48.8699	64.87
CELE_Y23H5B.8	Y23H5B.8	-2.15128	5.84578e-10	197.032	443.154	203.615	397.226	40.3926	45.4579	96.6774	96.7733
CELE_F53B1.4	bus-5	-2.25749	5.88708e-10	1208.66	2917.28	1255.13	2852.13	252.181	273.83	603.437	592.338
CELE_F10E7.10	cutl-5	-2.74255	5.97942e-10	36.2695	70.7943	36.3949	100.912	12.0086	9.74097	6.37434	8.50754
CELE_Y46C8AL.8	clec-74	2.4247	6.1915e-10	16.6644	27.5822	15.7383	31.1909	162.662	176.42	78.6168	73.3775
CELE_K09H9.3	col-49	1.56961	6.21492e-10	350.932	254.676	372.802	266.958	777.284	784.689	1036.89	1096.41
CELE_F30H5.3	F30H5.3	-2.1579	6.21492e-10	1942.87	4564.85	2046.97	4774.96	479.253	487.049	1032.64	987.938
CELE_Y69A2AL.1	grd-16	-2.51755	6.21492e-10	97.0455	199.511	99.3483	198.154	12.0086	12.988	46.7451	31.9033
CELE_ZK381.5	prkl-1	-1.93538	6.21492e-10	546.984	1306.48	595.106	1248.55	177.946	177.502	300.656	310.525
CELE_E03H12.5	E03H12.5	1.07308	6.22975e-10	105.868	83.666	118.038	71.5556	186.679	174.255	222.039	212.689
CELE_T01C4.2	odr-2	-1.6926	6.46933e-10	99.006	212.383	115.087	187.146	42.576	38.9639	47.8075	60.6162
CELE_R173.3	cest-19	-2.30808	6.53329e-10	83.3219	181.123	77.708	193.567	17.4671	19.4819	38.246	32.9667
CELE_T01D3.1	T01D3.1	-1.69972	6.56067e-10	320.544	692.313	319.685	632.992	125.545	134.209	173.169	172.278
CELE_Y71H2AM.15	gldi-9	-2.16442	6.56559e-10	772.443	1701.82	733.8	1662.29	170.304	168.844	375.024	372.205
CELE_C39D10.8	C39D10.8	1.04292	6.81311e-10	269.571	182.962	255.748	189.898	430.126	517.354	458.952	442.392
CELE_Y48G8AR.1	grh-1	-2.12415	7.01971e-10	863.607	1881.11	783.966	1900.81	223.797	186.161	420.706	414.743
CELE_K10H10.4	K10H10.4	-2.04975	7.03714e-10	121.552	262.031	106.234	275.214	52.4012	41.1286	43.558	47.8549
CELE_F29A7.4	F29A7.4	-2.3561	7.05545e-10	77.4403	149.863	80.659	157.789	12.0086	12.988	39.3084	26.5861
CELE_W02B12.1	W02B12.1	0.739716	7.1021e-10	402.886	545.208	394.442	509.146	778.376	834.477	733.049	748.664
CELE_C29H12.6	C29H12.6	-1.76392	7.14033e-10	251.926	581.065	287.225	573.363	94.9772	111.48	151.922	140.374
CELE_K10D2.6	emb-8	0.340306	7.20798e-10	2955.48	2630.42	2943.07	2754.89	3577.47	3466.7	3657.81	3580.61
CELE_ZC13.2	ZC13.2	-2.19414	7.30904e-10	35.2893	80.9078	49.1823	79.8121	12.0086	9.74097	16.9982	14.8882
CELE_T21C12.2	hpd-1	0.566535	7.55065e-10	3145.65	3091.96	3278.49	3149.37	5147.33	5241.73	4155.01	4213.36
CELE_T04F8.8	T04F8.8	1.37652	7.55065e-10	2375.16	1289.01	2299.76	1293.51	4329.65	4112.86	5231.21	5167.27
CELE_F21C10.11	F21C10.11	1.7202	7.55202e-10	11.7631	30.3404	17.7056	22.9345	65.5015	74.6808	78.6168	55.299
CELE_C40A11.3	C40A11.3	-1.23489	7.69445e-10	105.868	169.171	104.266	145.863	57.8596	48.7049	60.5562	56.3625
CELE_C08B11.4	nrf-6	0.78642	7.74181e-10	1503.71	1139.14	1559.08	1092.6	2358.05	2285.88	2170.46	2315.11
CELE_W07G1.5	rpi-1	-2.81515	7.74181e-10	67.6378	139.75	48.1987	128.433	5.45846	7.57631	14.8735	26.5861
CELE_C03A3.1	C03A3.1	-1.9573	7.75211e-10	204.874	410.055	201.647	385.3	49.1261	54.1165	105.177	101.027
CELE_T03G6.1	T03G6.1	-2.1014	7.78273e-10	531.3	1224.65	580.351	1261.4	139.737	133.127	291.095	274.368
CELE_F08B4.2	cdh-5	-2.22844	7.78321e-10	417.59	1009.51	450.51	956.827	102.619	84.4218	197.604	220.133
CELE_C08B6.4	cht-5	-3.45892	7.80706e-10	798.91	2171.64	819.377	2284.28	68.7766	54.1165	207.166	222.259
CELE_ZK520.5	cyn-2	0.796267	7.83701e-10	200.953	159.057	192.795	160.542	262.006	308.464	331.466	334.984
CELE_F31E3.2	F31E3.2	-1.92633	8.32238e-10	159.782	314.437	131.809	294.479	49.1261	42.2109	67.9929	77.6313
CELE_F11A5.5	F11A5.5	-2.69819	8.69217e-10	33.3288	73.5525	30.493	64.2166	6.55015	4.32932	12.7487	7.4441
CELE_C17D12.2	unc-75	-1.83524	8.72036e-10	308.781	651.859	320.669	681.613	121.178	93.0804	154.046	181.849
CELE_C14A11.7	ssr-2	-1.75823	8.82679e-10	68.618	115.845	60.9861	113.755	20.7421	32.4699	27.6221	25.5226
CELE_F59C6.7	che-13	-1.922	8.87547e-10	53.9142	110.329	68.8552	128.433	16.3754	25.9759	26.5597	26.5861
CELE_T28H11.1	ssq-4	0.918386	8.9192e-10	258.788	200.431	265.584	187.146	442.135	404.792	448.328	426.44
CELE_R05C11.1	arrd-26	-1.69564	9.1347e-10	59.7957	104.812	61.9697	96.3249	21.8338	20.5643	24.435	32.9667
CELE_F09F9.4	gogo-1	-2.13873	9.21877e-10	211.736	448.67	220.337	453.186	45.851	46.5402	116.863	93.5829
CELE_F13H10.5	F13H10.5	-2.31902	9.22497e-10	177.427	450.509	186.893	440.342	38.2092	38.9639	90.3031	84.012
CELE_F01D5.2	F01D5.2	1.87494	9.2844e-10	24.5064	22.0658	27.5421	17.4302	117.903	88.7511	67.9929	60.6162
CELE_H01G02.2	dyf-18	-2.74172	9.32588e-10	41.1708	76.3107	27.5421	77.0599	6.55015	4.32932	12.7487	9.57098
CELE_T23D8.2	tsp-7	-2.01796	9.38923e-10	160.762	310.759	154.432	310.992	39.3009	37.8816	83.9288	70.1872
CELE_ZC168.2	ZC168.2	-2.15591	9.38923e-10	61.7562	136.992	69.8389	118.342	21.8338	9.74097	27.6221	27.6495
CELE_H14A12.2	fum-1	0.359835	9.45708e-10	6758.88	6147.15	6797.98	5886.83	8317.6	8238.7	8185.71	8094.92
CELE_T16A1.1	math-42	-2.01971	9.48277e-10	48.0326	95.6183	56.0678	104.581	17.4671	15.1526	20.1854	22.3323
CELE_F58H1.2	F58H1.2	-1.95424	9.67898e-10	286.235	500.157	246.895	501.807	64.4098	61.6928	148.735	121.232
CELE_Y43F8C.4	dyf-19	-2.65521	9.71879e-10	95.085	230.771	80.659	179.806	14.192	8.65864	36.1212	34.0302
CELE_F27E5.4	phg-1	-1.91823	9.83496e-10	220.558	479.93	227.222	444.929	61.1347	68.1868	122.175	111.661
CELE_R08E5.2	cysl-3	0.45533	9.8945e-10	1274.33	1143.74	1273.82	1183.42	1637.54	1767.45	1690.26	1587.72
CELE_B0344.2	wrt-9	-2.12089	1.00059e-09	255.847	524.062	227.222	582.536	80.7852	49.7872	115.8	119.106
CELE_F08H9.2	F08H9.2	1.15824	1.01537e-09	148.999	115.845	142.629	75.2252	253.272	263.006	304.906	254.163
CELE_ZC15.5	ZC15.5	-2.30382	1.01713e-09	38.23	45.9703	28.5257	51.3733	8.73353	5.41165	7.43673	11.6979
CELE_Y75B8A.27	pqn-92	0.678723	1.02368e-09	323.485	403.619	319.685	386.217	548.029	535.753	571.566	640.192
CELE_Y102A11A.7	smex-2	-1.68802	1.03595e-09	60.776	91.0212	53.1169	99.077	19.6504	25.9759	24.435	24.4592
CELE_C01G8.5	erm-1	0.305965	1.04385e-09	6644.19	6359.53	6168.45	6417.07	8228.08	8228.96	7580.15	7598.3
CELE_T07H3.3	math-38	-1.83019	1.06636e-09	121.552	274.903	122.956	259.619	48.0344	66.0221	50.9947	54.2356
CELE_F22F4.1	sups-1	-2.26532	1.07434e-09	469.543	1120.76	496.741	1087.1	99.3439	95.2451	223.102	242.465
CELE_K06A5.2	K06A5.2	0.920978	1.09496e-09	271.531	198.592	291.159	185.311	435.585	419.944	452.578	481.739
CELE_K04G11.2	sel-7	-2.38766	1.12151e-09	244.084	600.372	215.419	576.115	54.5846	42.2109	94.5527	121.232
CELE_F17C8.1	acy-1	-1.49194	1.15799e-09	430.333	766.785	376.736	787.112	198.688	178.584	254.973	207.371
CELE_F29F11.5	ceh-22	-1.91732	1.1867e-09	98.0257	202.269	110.168	212.832	32.7507	27.0583	60.5562	44.6646
CELE_F59F5.7	F59F5.7	-2.07724	1.1867e-09	130.374	286.855	123.939	277.049	30.5674	37.8816	55.2443	70.1872
CELE_ZC155.1	nex-1	0.401801	1.19004e-09	4650.34	4155.72	4546.41	4214.44	5493.39	5514.47	6196.92	6001.01
CELE_Y6B3B.7	Y6B3B.7	-2.08512	1.19323e-09	69.5983	148.944	65.9043	156.872	24.0172	19.4819	24.435	36.157
CELE_F22B7.7	twk-7	-1.52018	1.19587e-09	173.506	346.616	193.778	354.109	82.9685	85.5041	97.7398	106.344
CELE_D2092.8	D2092.8	-2.29455	1.20421e-09	169.585	378.795	149.514	378.878	37.1175	31.3876	78.6168	72.3141
CELE_F56D2.1	ucr-1	0.311977	1.20892e-09	9892.76	9149.01	9901.38	8929.78	11714.9	11729.2	11556.7	12011.6
CELE_C04F12.7	C04F12.7	1.049	1.22022e-09	321.524	202.269	310.832	226.593	516.37	470.814	584.314	622.114
CELE_F53A2.1	F53A2.1	-1.87636	1.23038e-09	73.5193	139.75	79.6753	144.029	30.5674	17.3173	40.3708	30.8398
CELE_T27E9.9	acc-4	-1.80283	1.24213e-09	93.1245	195.834	92.4627	199.071	41.4843	41.1286	47.8075	36.157
CELE_R11H6.1	pes-9	0.669157	1.28268e-09	4472.91	3409.16	4220.83	3303.49	5997.75	6222.32	6042.87	6232.84
CELE_B0207.12	avr-14	-1.71846	1.313e-09	132.335	305.243	161.318	287.14	58.9513	56.2812	67.9929	86.1388
CELE_ZK1193.1	col-19	1.54081	1.32346e-09	16910.4	8141.34	16815.4	7941.76	33833.7	33223.2	39288.2	38575.3
CELE_F59A6.10	F59A6.10	-3.348	1.32361e-09	32.3485	63.439	21.6402	78.8947	2.18338	4.32932	4.24956	8.50754
CELE_C35E7.11	C35E7.11	-1.94903	1.35501e-09	108.809	275.822	128.858	252.28	40.3926	37.8816	63.7434	56.3625
CELE_F15H10.8	F15H10.8	-2.45262	1.35777e-09	86.2627	188.478	76.7244	222.923	17.4671	15.1526	37.1836	35.0936
CELE_B0222.8	col-10	-1.74396	1.37551e-09	3489.72	8004.35	3227.34	7707.83	1456.32	1414.61	1908.05	1917.39
CELE_K08F4.8	msp-38	1.0161	1.37848e-09	230.361	163.654	203.615	187.146	383.184	395.051	434.517	373.268
CELE_W08E12.3	idpp-12	-2.32423	1.40608e-09	88.2232	217.899	78.6917	205.493	24.0172	18.3996	37.1836	38.2839
CELE_F32B4.8	F32B4.8	-2.19838	1.41989e-09	61.7562	114.926	57.0515	130.268	16.3754	14.0703	26.5597	22.3323
CELE_B0205.10	B0205.10	1.01183	1.42325e-09	114.69	91.0212	110.168	89.9032	185.588	172.091	199.729	259.48
CELE_H10E21.4	H10E21.4	-1.84112	1.42824e-09	472.484	1052.72	498.709	986.184	159.387	145.032	260.285	275.432
CELE_T24B8.5	sysm-1	2.05064	1.44371e-09	215.657	130.556	245.912	116.507	973.789	974.097	475.951	510.452
CELE_T25C12.1	lin-14	-1.90285	1.44383e-09	1821.32	4290.87	1810.89	4363.06	591.697	673.209	997.584	1023.03
CELE_R08A2.5	R08A2.5	-2.86752	1.45609e-09	33.3288	65.2779	23.6075	57.7949	7.64184	4.32932	3.18717	9.57098
CELE_C48B6.8	bbs-9	-2.40011	1.47838e-09	59.7957	143.427	64.9206	133.02	8.73353	14.0703	22.3102	30.8398
CELE_M28.7	nphp-1	-2.0269	1.47838e-09	112.73	239.046	138.694	295.396	36.0258	31.3876	69.0553	56.3625
CELE_Y53F4B.29	gst-26	1.27344	1.50035e-09	432.294	239.046	393.458	233.015	841.694	811.748	728.799	752.917
CELE_F41E7.4	fip-5	1.34776	1.51006e-09	115.67	140.669	114.103	116.507	236.897	252.183	362.275	388.157
CELE_T13H5.3	cht-2	-2.0673	1.52851e-09	114.69	206.866	113.119	233.932	22.9255	28.1406	59.4938	48.9184
CELE_Y38H6C.14	famh-161	-2.20702	1.53498e-09	126.453	292.371	115.087	266.958	27.2923	28.1406	58.4314	59.5528
CELE_T23G11.1	T23G11.1	0.836027	1.53844e-09	163.703	132.395	151.482	111.92	253.272	216.466	252.849	274.368
CELE_F15A2.6	sad-1	-1.95826	1.54733e-09	383.281	925.842	322.636	832.064	144.103	119.056	183.793	187.166
CELE_F56E3.4	fax-1	-2.24768	1.56744e-09	68.618	153.541	83.6099	156.872	12.0086	17.3173	27.6221	40.4108
CELE_F52B10.2	hst-3.2	-1.70101	1.58332e-09	148.999	248.24	111.152	255.032	44.7593	51.9519	63.7434	74.441
CELE_F49D11.6	F49D11.6	-2.4577	1.58526e-09	147.039	293.291	136.727	299.066	30.5674	14.0703	71.1801	43.6011
CELE_B0205.4	B0205.4	-2.07401	1.59141e-09	69.5983	142.508	62.9534	117.425	16.3754	17.3173	22.3102	37.2205
CELE_R57.1	gcp-2.1	0.500444	1.61149e-09	1029.27	1048.12	998.401	1025.63	1314.4	1342.09	1525.59	1619.62
CELE_ZC101.3	hhat-1	-2.11291	1.64795e-09	424.451	1018.7	512.48	1031.14	114.628	102.821	259.223	213.752
CELE_F21E9.2	F21E9.2	-2.50582	1.65793e-09	50.9734	114.006	50.166	137.607	10.9169	8.65864	21.2478	21.2689
CELE_C12D8.14	fipr-4	-1.8251	1.67809e-09	98.0257	202.269	107.217	211.915	30.5674	47.6225	47.8075	48.9184
CELE_T27B7.7	fbxa-137	-2.33651	1.68349e-09	40.1906	94.6989	41.3131	94.4901	13.1003	9.74097	16.9982	13.8248
CELE_M03F8.1	M03F8.1	-1.52103	1.68653e-09	100.967	164.574	97.381	172.467	36.0258	43.2932	50.9947	56.3625
CELE_F19C7.7	col-110	1.5753	1.70373e-09	52.9339	44.1315	51.1496	32.1083	118.994	90.9157	156.171	170.151
CELE_C02F12.7	tag-278	-1.97392	1.72145e-09	807.732	1763.42	809.541	1913.65	252.181	218.631	435.58	441.329
CELE_C05E11.3	C05E11.3	-1.37417	1.72145e-09	458.761	825.627	483.954	822.89	200.871	213.219	288.97	296.7
CELE_C53D5.2	45355	-2.00123	1.72253e-09	212.716	478.091	237.059	482.542	54.5846	62.7752	120.05	114.852
CELE_Y54G2A.25	lad-2	-2.14115	1.7399e-09	270.551	675.764	276.405	657.761	67.6849	80.0924	115.8	162.707
CELE_W01A11.7	W01A11.7	-1.93467	1.82001e-09	66.6575	138.83	65.9043	143.111	30.5674	25.9759	30.8093	21.2689
CELE_F52E1.8	pho-6	2.22116	1.83613e-09	20.5854	35.8569	24.5912	44.9516	96.0688	81.1748	205.041	206.308
CELE_C43H6.6	C43H6.6	-2.54733	1.84542e-09	53.9142	119.523	57.0515	120.177	13.1003	5.41165	19.123	22.3323
CELE_Y42A5A.2	lact-8	-1.58382	1.85202e-09	150.96	297.888	156.4	285.305	60.043	67.1045	79.6792	90.3926
CELE_K02E7.1	K02E7.1	-3.2512	1.88516e-09	21.5657	47.8091	27.5421	55.9602	2.18338	1.08233	7.43673	5.31721
CELE_C43E11.6	nab-1	-2.00181	1.89803e-09	1989.92	4734.94	2165.01	4801.57	581.872	579.047	1138.88	1118.74
CELE_F17B5.2	oac-17	-3.36486	1.91702e-09	20.5854	44.1315	23.6075	44.0342	0	4.32932	3.18717	5.31721
CELE_C26F1.5	grl-10	-1.6095	1.92986e-09	268.591	517.626	261.65	516.485	110.261	99.5744	160.421	142.501
CELE_F29C12.1	pqn-32	-2.06545	1.94276e-09	1395.89	2915.44	1414.48	3502.56	366.808	360.416	700.115	777.377
CELE_F58H1.5	F58H1.5	-1.40688	1.96023e-09	343.09	661.973	350.178	593.545	163.754	150.444	208.228	212.689
CELE_C53D6.2	unc-129	-1.89908	1.9635e-09	386.221	851.37	388.54	831.146	104.802	132.044	216.727	205.244
CELE_F58H7.1	F58H7.1	-2.28066	1.96639e-09	41.1708	112.168	61.9697	112.838	13.1003	15.1526	24.435	14.8882
CELE_F56D5.1	col-121	-2.13507	1.9884e-09	836.16	1950.06	913.807	1832.01	168.12	213.219	427.081	450.9
CELE_C30F8.2	vha-16	0.401948	2.05099e-09	6306	6970.02	6641.58	6990.44	9312.13	9064.52	8600.04	8578.79
CELE_C29A12.4	nrx-1	-1.78075	2.05099e-09	394.064	783.334	348.211	777.021	143.012	115.809	184.856	226.513
CELE_K03A11.6	K03A11.6	-2.75876	2.05475e-09	25.4867	54.245	25.5748	54.1254	4.36677	4.32932	8.49912	6.38066
CELE_F08D12.2	F08D12.2	0.586795	2.10974e-09	251.926	263.87	265.584	223.841	379.909	373.404	403.708	351.999
CELE_F45G2.1	nas-1	-2.27731	2.17127e-09	56.8549	131.475	57.0515	113.755	20.7421	17.3173	20.1854	15.9516
CELE_T10E9.4	T10E9.4	0.937185	2.18861e-09	282.314	193.075	300.996	215.584	423.576	434.014	506.76	532.785
CELE_F57H12.2	unc-24	-2.00558	2.22568e-09	111.749	261.111	111.152	243.106	28.384	40.0462	59.4938	53.1721
CELE_F53A9.4	jbts-14	-2.30499	2.22704e-09	37.2498	71.7137	35.4113	77.9773	8.73353	9.74097	15.9358	10.6344
CELE_F52H2.6	dhcr-24	0.502445	2.23886e-09	466.603	498.318	512.48	468.781	621.172	693.774	704.364	736.966
CELE_F18F11.3	cdh-8	-2.09838	2.28082e-09	263.689	624.277	296.077	642.166	90.6104	56.2812	131.736	147.819
CELE_R08F11.4	R08F11.4	1.2274	2.28761e-09	37.2498	37.6957	40.3295	32.1083	70.9599	76.8455	101.989	94.6464
CELE_C46H11.7	C46H11.7	-2.01368	2.30579e-09	61.7562	154.46	79.6753	158.707	25.1089	21.6466	32.9341	32.9667
CELE_F10E7.9	F10E7.9	-1.73513	2.30579e-09	363.676	779.657	339.358	741.243	128.82	139.621	195.48	204.181
CELE_F01G10.10	F01G10.10	-1.63463	2.32168e-09	161.742	309.84	142.629	281.636	60.043	62.7752	82.8664	82.9485
CELE_W04B5.3	W04B5.3	0.695041	2.32846e-09	788.127	741.042	782.982	773.351	1260.9	1246.84	1308.86	1178.29
CELE_T12C9.3	twk-2	-1.74998	2.39196e-09	176.446	329.148	138.694	359.613	74.235	67.1045	76.492	80.8216
CELE_Y59E9AL.2	nsph-4.1	1.01565	2.42725e-09	73.5193	49.6479	64.9206	66.9687	138.645	120.139	122.175	133.994
CELE_ZK6.11	irg-8	2.44802	2.42725e-09	794.989	224.335	838.067	250.445	2025.09	2073.74	3625.94	3774.16
CELE_F46G10.5	ptr-24	0.555128	2.43847e-09	548.944	487.285	555.76	455.02	765.276	686.197	747.922	806.089
CELE_Y67A10A.6	ssu-2	-1.90154	2.44747e-09	125.473	227.093	133.776	245.858	32.7507	30.3052	58.4314	74.441
CELE_ZC449.1	ZC449.1	-2.37235	2.47002e-09	222.518	512.109	202.631	520.154	48.0344	33.5522	100.927	98.9002
CELE_B0491.4	lgc-20	-2.13639	2.47522e-09	89.2034	175.607	78.6917	160.542	24.0172	15.1526	39.3084	36.157
CELE_F10D11.6	F10D11.6	-1.89915	2.48018e-09	1590.96	3876.22	1672.2	3793.37	529.47	559.565	890.282	951.781
CELE_F40E10.2	sox-3	-1.68632	2.48018e-09	82.3416	144.347	81.6426	154.12	34.9341	25.9759	38.246	44.6646
CELE_Y6D1A.2	Y6D1A.2	-1.64369	2.49509e-09	81.3614	136.072	77.708	130.268	30.5674	23.8113	35.0589	46.7915
CELE_C16E9.4	inx-1	-1.90029	2.49843e-09	586.194	1303.72	633.468	1403.59	171.396	205.643	342.089	332.858
CELE_Y17G9B.7	fbxb-77	-1.39662	2.52014e-09	62.7365	96.5377	67.8716	94.4901	24.0172	25.9759	37.1836	35.0936
CELE_Y64G10A.7	Y64G10A.7	-1.75706	2.52307e-09	550.905	1129.03	577.4	1143.97	180.129	192.655	309.155	324.35
CELE_K01A2.4	K01A2.4	-3.05042	2.52633e-09	32.3485	68.9555	27.5421	66.9687	6.55015	9.74097	2.12478	5.31721
CELE_F48E3.6	F48E3.6	-0.89025	2.53234e-09	309.761	430.282	284.274	398.143	183.404	175.338	207.166	202.054
CELE_F16B4.4	F16B4.4	1.18924	2.56715e-09	900.857	612.325	882.331	592.627	1509.81	1449.24	1970.73	1882.29
CELE_F47G6.1	dyb-1	-1.40804	2.5975e-09	386.221	693.232	357.064	678.861	157.204	190.49	234.788	214.815
CELE_K05F1.3	acdh-8	0.9645	2.5975e-09	129.394	78.1495	118.038	88.9859	192.138	199.149	208.228	207.371
CELE_K07A9.2	cmk-1	-1.70385	2.63446e-09	355.833	662.892	321.652	723.813	128.82	119.056	211.416	174.405
CELE_F22E10.4	pgp-15	-2.56466	2.64748e-09	35.2893	102.974	46.2314	120.177	15.2837	8.65864	15.9358	11.6979
CELE_C33F10.9	msp-40	0.956006	2.65244e-09	570.51	375.118	571.498	397.226	886.453	874.523	989.085	961.352
CELE_E01G6.1	E01G6.1	-1.85605	2.6619e-09	175.466	403.619	178.04	391.721	62.2264	63.8575	93.4903	97.8367
CELE_D2096.6	D2096.6	-1.95865	2.68643e-09	357.794	877.114	408.213	922.884	120.086	124.468	193.355	222.259
CELE_C50D2.1	C50D2.1	-1.97443	2.72059e-09	349.952	805.4	354.113	822.89	98.2522	114.727	183.793	196.737
CELE_ZK1320.1	gstk-1	0.398858	2.77297e-09	648.93	591.178	670.847	623.818	813.31	838.806	859.473	828.422
CELE_Y63D3A.7	ndua-2	0.471367	2.80513e-09	943.008	854.129	1049.55	895.363	1234.7	1309.62	1359.86	1281.45
CELE_T01D3.3	T01D3.3	-2.0591	2.82653e-09	276.433	707.943	300.012	639.414	81.8769	75.7631	159.358	144.628
CELE_R13A5.9	mfsd-6	-1.58191	2.91769e-09	374.458	675.764	348.211	755.921	136.461	163.432	212.478	207.371
CELE_T08H4.3	ast-1	-1.76715	2.9393e-09	257.808	524.062	266.568	589.875	92.7938	93.0804	146.61	148.882
CELE_Y25C1A.1	clec-123	0.873039	2.9434e-09	110.769	89.1824	78.6917	94.4901	163.754	152.609	176.357	190.356
CELE_F08F8.3	kap-1	-1.4241	2.95168e-09	184.288	317.195	184.925	309.157	74.235	76.8455	112.613	107.408
CELE_K12C11.1	K12C11.1	0.324893	2.95709e-09	2410.45	2290.24	2290.91	2167.77	2923.55	2963.42	2723.97	2860.66
CELE_ZK354.5	msp-51	0.96978	2.95749e-09	469.543	339.261	458.379	288.057	710.691	705.679	791.48	835.866
CELE_R03H10.2	R03H10.2	-1.70123	3.01685e-09	599.918	1120.76	575.433	1195.35	196.504	193.737	330.403	353.063
CELE_F43G9.1	idha-1	0.211404	3.02304e-09	5486.5	5406.11	5470.06	5152.92	6236.83	6253.7	6243.66	6174.35
CELE_C34C6.3	C34C6.3	-2.0413	3.02304e-09	141.157	360.407	168.203	304.57	41.4843	37.8816	69.0553	88.2657
CELE_K06A1.3	cutl-16	-1.73645	3.04477e-09	360.735	744.719	373.786	727.482	126.636	113.645	205.041	216.942
CELE_C49F8.3	C49F8.3	-1.86062	3.10879e-09	504.833	1129.03	487.888	1120.12	159.387	172.091	286.845	274.368
CELE_F54B8.4	F54B8.4	0.94428	3.12782e-09	82.3416	102.054	72.7898	91.738	169.212	145.032	183.793	174.405
CELE_F11E6.8	F11E6.8	-1.76302	3.14431e-09	360.735	804.481	362.965	775.186	125.545	141.785	184.856	226.513
CELE_ZK829.3	ZK829.3	-2.76103	3.15367e-09	54.8944	104.812	51.1496	108.251	6.55015	3.24699	21.2478	15.9516
CELE_F29C4.2	cox-6C	0.416132	3.15687e-09	4210.21	3692.34	4137.22	3768.6	5235.75	5160.55	5362.94	5332.1
CELE_C09F9.3	glna-1	0.787758	3.19493e-09	112.73	103.893	129.841	101.829	177.946	214.301	195.48	185.039
CELE_F25H8.6	bed-3	-1.7438	3.19955e-09	395.044	829.305	414.115	842.155	141.92	137.456	212.478	248.846
CELE_R08A2.1	R08A2.1	1.37108	3.22752e-09	36.2695	28.5016	29.5094	27.5214	68.7766	62.7752	101.989	80.8216
CELE_B0218.7	B0218.7	1.17156	3.26561e-09	52.9339	47.8091	79.6753	50.4559	118.994	122.303	137.048	140.374
CELE_M04C9.5	dyf-5	-2.1155	3.28539e-09	78.4206	207.786	101.316	178.889	21.8338	25.9759	53.1195	29.7764
CELE_W04A8.4	W04A8.4	-1.62651	3.28561e-09	1608.6	3210.57	1676.13	3000.75	564.404	560.647	993.334	957.098
CELE_ZC250.1	cyn-17	-2.17927	3.29971e-09	399.945	809.997	412.148	892.611	77.5101	80.0924	207.166	190.356
CELE_K09E2.3	K09E2.3	0.443589	3.30816e-09	615.602	619.68	649.206	588.958	872.261	784.689	844.6	861.388
CELE_F40F8.8	arrd-6	-1.58615	3.33101e-09	108.809	199.511	106.234	197.237	45.851	41.1286	53.1195	63.8066
CELE_H14E04.1	strm-1	-1.67803	3.34366e-09	204.874	385.231	195.746	383.465	63.3181	73.5985	111.551	116.979
CELE_ZK816.4	nspg-4	-2.7431	3.34366e-09	41.1708	102.054	46.2314	89.9032	5.45846	3.24699	12.7487	20.2054
CELE_C05E11.5	amt-4	0.449716	3.34366e-09	831.258	844.015	759.375	851.329	1082.96	1148.35	1120.82	1136.82
CELE_F09B12.1	mlt-9	-2.18136	3.37973e-09	903.797	2217.61	896.102	2109.06	213.972	201.313	469.576	465.788
CELE_K05C4.11	sol-2	-1.69779	3.39658e-09	111.749	235.368	130.825	234.849	39.3009	47.6225	71.1801	61.6797
CELE_F54C1.5	dyf-1	-1.73769	3.43976e-09	96.0652	200.431	105.25	206.411	41.4843	38.9639	46.7451	55.299
CELE_F53A9.3	F53A9.3	-2.9731	3.49889e-09	40.1906	104.812	44.2641	104.581	3.27507	3.24699	16.9982	13.8248
CELE_T23F2.1	bus-8B	-2.2003	3.55821e-09	801.851	1831.46	785.933	1881.55	161.57	180.749	390.959	420.06
CELE_Y72A10A.1	Y72A10A.1	-1.53765	3.60953e-09	181.348	333.745	187.876	314.661	68.7766	66.0221	111.551	104.217
CELE_F19H8.3	arl-3	-1.89782	3.62384e-09	110.769	219.738	104.266	248.61	43.6677	31.3876	56.3066	52.1087
CELE_T22B2.4	sup-12	-1.48658	3.72872e-09	734.213	1370.84	781.015	1513.68	316.591	320.37	481.262	451.963
CELE_F47B10.1	suca-1	0.364685	3.77645e-09	5147.33	4866.42	5075.61	4600.66	6640.76	6530.78	6052.43	6127.56
CELE_Y23H5A.5	ctn-1	-1.17933	3.82968e-09	1264.53	2125.67	1264.97	2034.75	623.356	643.987	839.288	847.564
CELE_F09B9.1	oac-14	2.07249	3.82968e-09	75.4798	51.4868	66.8879	65.134	146.287	151.526	381.398	409.425
CELE_F21F8.3	asp-5	0.651262	3.87082e-09	18522.9	24198.8	18654.8	23270.3	34242	33501.4	32471.9	32728.5
CELE_C03C10.5	C03C10.5	-1.81747	3.98266e-09	191.15	364.085	186.893	344.935	46.9427	56.2812	96.6774	108.471
CELE_C25G4.6	smz-1	1.03282	3.98266e-09	123.512	142.508	194.762	119.259	283.84	260.842	326.154	314.779
CELE_ZK470.14	ZK470.14	-2.42909	4.0055e-09	33.3288	90.1018	45.2477	67.8861	8.73353	6.49398	11.6863	17.0151
CELE_DY3.6	mfb-1	-1.55381	4.03254e-09	418.57	861.484	399.36	893.528	216.155	199.149	228.414	232.894
CELE_ZK354.11	msp-59	1.02449	4.05021e-09	524.438	312.598	463.297	298.149	793.66	787.936	857.348	810.343
CELE_F11G11.11	col-20	1.12357	4.06788e-09	31067.3	18224.5	30382.9	18261.4	49627.2	49795.9	56811.3	57151.5
CELE_F26F12.1	col-140	1.35498	4.08732e-09	39723	20998.3	39190.4	20258.5	72707.7	72417.6	82436.1	79824.1
CELE_F22F7.3	F22F7.3	-2.13705	4.10049e-09	80.3811	182.962	67.8716	154.12	18.5588	20.5643	29.7469	41.4743
CELE_F09E10.6	F09E10.6	-2.36629	4.13223e-09	70.5785	153.541	79.6753	143.111	13.1003	8.65864	32.9341	31.9033
CELE_K05F1.9	K05F1.9	1.13006	4.14115e-09	61.7562	43.2121	56.0678	41.2821	110.261	89.8334	130.674	110.598
CELE_F17E9.5	F17E9.5	0.863655	4.14115e-09	394.064	269.386	372.802	270.627	540.387	573.635	643.808	617.86
CELE_C10G11.9	spch-2	1.16222	4.22942e-09	80.3811	52.4062	73.7735	55.0428	125.545	128.797	157.234	172.278
CELE_T25D10.4	T25D10.4	-1.41802	4.26106e-09	350.932	652.779	360.998	670.605	162.662	160.185	220.977	218.006
CELE_F57F4.3	gfi-1	1.16954	4.26106e-09	3682.83	3433.98	3685.72	3588.79	9033.75	8922.73	7142.44	7272.88
CELE_T09F5.1	T09F5.1	-1.79839	4.29746e-09	73.5193	150.783	83.6099	139.442	29.4757	18.3996	38.246	42.5377
CELE_ZK675.3	best-23	-1.67562	4.31239e-09	92.1442	159.057	94.43	147.698	36.0258	27.0583	44.6204	46.7915
CELE_C41G11.3	rgs-6	-1.73987	4.33176e-09	246.045	581.984	286.241	555.015	106.986	97.4097	172.107	123.359
CELE_Y71D11A.5	lgc-46	-2.26136	4.35632e-09	69.5983	191.237	86.5609	191.732	15.2837	23.8113	36.1212	37.2205
CELE_Y54G2A.76	Y54G2A.76	-2.26567	4.35632e-09	248.005	536.014	242.961	567.858	41.4843	54.1165	111.551	124.423
CELE_C38C6.3	C38C6.3	-2.24452	4.40647e-09	107.828	308.001	125.907	265.123	19.6504	40.0462	54.1819	56.3625
CELE_F52E10.5	ifa-3	-2.02845	4.43232e-09	775.384	1859.04	818.394	1845.77	203.055	227.289	437.704	430.694
CELE_ZK1127.10	cth-2	0.30332	4.46703e-09	4151.39	4058.26	4165.74	4096.1	5178.98	5261.21	4866.81	5018.39
CELE_Y47D3B.7	sbp-1	0.495543	4.49889e-09	694.022	744.719	652.157	749.499	962.872	1004.4	1042.2	996.446
CELE_F32B6.4	F32B6.4	0.98838	4.49889e-09	54.8944	49.6479	61.9697	50.4559	97.1605	99.5744	112.613	120.169
CELE_K09A9.5	gas-1	0.300546	4.54487e-09	2421.24	2544	2447.31	2497.11	2931.19	2969.91	3111.74	3192.45
CELE_Y51A2D.19	slo-1	-1.81937	4.55558e-09	519.536	1184.2	552.809	1177.92	191.046	166.679	300.656	314.779
CELE_W08G11.1	W08G11.1	-2.34186	4.62824e-09	104.888	198.592	92.4627	217.419	24.0172	10.8233	38.246	47.8549
CELE_Y116F11A.6	Y116F11A.6	-1.64026	4.67563e-09	155.861	301.565	153.449	288.057	54.5846	59.5282	74.3673	99.9636
CELE_ZK896.4	ZK896.4	0.893956	4.67748e-09	70.5785	67.1167	69.8389	67.8861	121.178	135.291	122.175	132.93
CELE_T07D10.3	T07D10.3	1.53139	4.68887e-09	19.6051	17.4687	16.722	16.5128	49.1261	45.4579	49.9323	58.4893
CELE_F20C5.2	klp-11	-1.71631	4.70315e-09	305.84	616.922	290.176	598.132	117.903	98.4921	160.421	174.405
CELE_T12A2.16	hot-4	-1.8866	4.70709e-09	59.7957	133.314	61.9697	117.425	17.4671	24.8936	26.5597	31.9033
CELE_Y76A2B.2	lron-13	-2.07501	4.75118e-09	96.0652	245.482	117.054	245.858	33.8424	28.1406	48.8699	56.3625
CELE_F58B4.3	F58B4.3	-1.57943	4.75118e-09	166.644	322.712	170.171	347.687	86.2436	67.1045	94.5527	89.3292
CELE_T02E9.2	grl-7	-1.94139	4.78211e-09	1047.9	2342.65	1031.84	2322.81	271.831	325.781	588.564	570.005
CELE_C25B8.4	clec-266	-0.878518	4.80251e-09	2335.95	3391.69	2378.46	3375.96	1435.57	1395.12	1729.57	1685.56
CELE_F47G4.4	F47G4.4	-1.2622	4.88749e-09	1118.47	1921.56	1082.01	1934.75	530.562	572.553	658.682	763.552
CELE_Y55D5A.1	Y55D5A.1	-1.50146	4.96472e-09	277.413	494.641	263.617	488.046	104.802	106.068	176.357	151.009
CELE_F46F11.5	vha-10	0.533898	4.97375e-09	4729.74	4808.5	4699.86	4926.33	7162.59	6675.81	7269.93	6639.07
CELE_F07H5.6	idpa-2	-2.47915	5.04816e-09	53.9142	69.8749	42.2968	90.8206	9.82522	4.32932	14.8735	17.0151
CELE_T21D12.15	best-19	-0.772663	5.11716e-09	329.367	407.297	299.028	399.06	221.613	193.737	211.416	213.752
CELE_F52E4.1	pccb-1	0.346503	5.16166e-09	7061.77	6496.53	7200.29	6334.51	8324.15	8437.85	8710.53	8972.26
CELE_Y49E10.29	Y49E10.29	1.16543	5.27165e-09	167.624	101.135	139.678	100.912	339.516	298.723	248.599	254.163
CELE_Y53G8AL.2	nduf-9	0.306063	5.31267e-09	3462.27	3481.79	3486.04	3386.05	4382.05	4306.59	4340.92	4051.72
CELE_ZK512.6	eat-4	-1.58869	5.36589e-09	104.888	212.383	108.201	207.328	49.1261	56.2812	55.2443	49.9818
CELE_F53H4.3	F53H4.3	-1.79385	5.5061e-09	98.0257	226.174	110.168	223.841	38.2092	44.3755	50.9947	56.3625
CELE_T02C5.5	unc-2	-1.74474	5.66121e-09	625.404	1481.16	683.634	1534.78	287.115	242.442	365.462	395.601
CELE_M195.2	M195.2	-2.04625	5.74966e-09	124.493	252.837	109.185	247.693	29.4757	28.1406	53.1195	66.9969
CELE_F36H1.11	F36H1.11	-2.84303	5.95151e-09	52.9339	178.365	60.0024	177.054	9.82522	7.57631	25.4973	22.3323
CELE_Y54G2A.14	clec-83	0.638493	5.99614e-09	924.383	989.281	886.265	949.488	1339.51	1318.28	1584.02	1595.16
CELE_E04A4.6	tctn-1	-2.02096	6.1128e-09	69.5983	157.219	67.8716	175.22	22.9255	25.9759	32.9341	34.0302
CELE_T27A3.3	ssp-16	1.07477	6.13979e-09	97.0455	56.0838	80.659	69.7209	146.287	136.374	183.793	171.214
CELE_F58E6.13	F58E6.13	-1.70782	6.14804e-09	345.051	818.272	370.835	760.508	144.103	140.703	206.104	211.625
CELE_R90.1	ttbk-7	-1.61781	6.29935e-09	1387.06	3022.09	1450.88	2963.14	569.863	570.388	859.473	875.213
CELE_F53F4.6	rdy-2	-1.77627	6.42371e-09	94.1047	174.687	76.7244	179.806	33.8424	33.5522	44.6204	41.4743
CELE_F23H11.8	pef-1	-1.69147	6.47145e-09	120.572	267.547	140.661	267.875	52.4012	50.8695	73.3049	70.1872
CELE_F38B6.6	F38B6.6	-1.68944	6.50522e-09	111.749	222.496	117.054	240.354	48.0344	38.9639	61.6186	65.9334
CELE_Y11D7A.4	rab-28	-2.31305	6.50674e-09	60.776	165.493	73.7735	152.285	16.3754	12.988	38.246	23.3957
CELE_K07C11.10	K07C11.10	-2.39461	6.57789e-09	26.467	53.3256	27.5421	55.9602	6.55015	6.49398	10.6239	7.4441
CELE_C18C4.3	ugt-48	0.763013	6.61525e-09	231.341	189.398	196.729	210.997	314.407	303.052	399.458	388.157
CELE_Y47G6A.32	Y47G6A.32	-2.05999	6.64356e-09	66.6575	134.233	60.0024	141.277	19.6504	17.3173	32.9341	26.5861
CELE_F33H1.1	daf-19	-0.84919	6.67931e-09	933.205	1425.08	980.695	1361.39	626.631	640.74	674.617	667.842
CELE_ZC13.4	mab-7	-1.67288	6.88328e-09	228.4	409.136	215.419	483.459	77.5101	86.5864	133.861	121.232
CELE_R01H10.6	bbs-5	-1.63718	7.02648e-09	93.1245	174.687	103.283	168.798	28.384	35.7169	54.1819	55.299
CELE_Y75B8A.12	osm-12	-2.2236	7.05289e-09	66.6575	150.783	45.2477	133.02	17.4671	20.5643	21.2478	25.5226
CELE_ZC487.1	ZC487.1	-1.92126	7.05305e-09	102.927	195.834	107.217	206.411	24.0172	28.1406	48.8699	60.6162
CELE_F27E11.3	cfz-2	-1.41595	7.06909e-09	752.838	1451.74	713.143	1331.12	358.075	314.958	434.517	484.93
CELE_C43F9.8	efn-2	-1.54171	7.12521e-09	316.623	622.438	342.309	600.884	134.278	116.892	197.604	197.8
CELE_K08F8.1	mak-1	0.29505	7.14827e-09	2873.13	2968.76	2800.44	2876.9	3492.32	3414.75	3545.19	3681.64
CELE_F58A6.8	msp-45	0.939402	7.16182e-09	485.227	313.518	398.377	300.901	695.407	627.752	826.539	721.014
CELE_H36L18.2	lep-5	0.574875	7.16654e-09	916.541	892.744	894.134	823.807	1164.83	1180.82	1480.97	1426.08
CELE_C17H12.9	ceh-48	-2.14986	7.19752e-09	224.479	543.369	229.19	566.023	54.5846	57.3635	113.676	126.55
CELE_C27A12.5	ceh-2	-1.90874	7.24709e-09	40.1906	55.1644	41.3131	72.473	12.0086	6.49398	20.1854	17.0151
CELE_K01D12.8	K01D12.8	-2.38865	7.3712e-09	47.0524	91.0212	50.166	109.168	13.1003	6.49398	19.123	18.0785
CELE_F18E9.5	jmjd-3.1	-1.56047	7.48379e-09	1100.83	2218.53	1057.42	2126.49	460.694	415.615	659.744	668.905
CELE_C47B2.6	gale-1	0.702493	7.5105e-09	1725.25	1331.3	1745.97	1370.57	2781.63	2685.26	2258.64	2318.3
CELE_B0240.3	daf-11	-2.40564	7.5632e-09	56.8549	136.992	58.0351	139.442	9.82522	11.9056	24.435	27.6495
CELE_F33G12.6	F33G12.6	-1.14828	7.5659e-09	818.515	1427.84	855.772	1397.17	446.502	471.896	534.382	577.449
CELE_F01D5.6	F01D5.6	-1.89164	7.76521e-09	275.452	594.856	288.208	554.098	80.7852	70.3515	150.859	159.516
CELE_Y102A11A.9	Y102A11A.9	-1.39742	7.88264e-09	79.4009	125.039	81.6426	132.103	37.1175	38.9639	44.6204	38.2839
CELE_T27F2.4	zip-10	1.33935	8.05523e-09	28.4275	33.0986	32.4603	39.4473	61.1347	85.5041	96.6774	94.6464
CELE_F11G11.10	col-17	1.56183	8.06139e-09	259.768	234.449	258.699	224.758	579.688	510.86	903.031	892.228
CELE_F26G1.6	nep-12	-1.80117	8.13039e-09	141.157	291.452	150.498	290.809	46.9427	46.5402	89.2407	68.0603
CELE_C15C6.2	C15C6.2	1.0589	8.13799e-09	360.735	226.174	342.309	243.106	529.47	515.189	702.239	693.365
CELE_C35D10.12	C35D10.12	-1.90297	8.1917e-09	77.4403	168.251	77.708	141.277	18.5588	25.9759	39.3084	40.4108
CELE_Y65B4BR.2	lpr-1	-1.99895	8.21388e-09	126.453	284.097	124.923	290.809	33.8424	37.8816	64.8058	70.1872
CELE_C24F3.6	col-124	1.53418	8.27786e-09	30035.1	15105.8	29676.6	14392.8	57566	56911.1	71391.5	72503.4
CELE_F52B11.4	col-133	0.791537	8.29111e-09	1167.49	941.472	1132.18	920.132	1865.7	1831.3	1754.01	1750.43
CELE_C46H11.8	phat-1	-2.55559	8.36977e-09	137.236	329.148	126.89	311.909	19.6504	17.3173	62.681	54.2356
CELE_T03F1.10	clec-53	0.830797	8.38349e-09	109.789	132.395	111.152	133.02	221.613	196.984	194.417	253.099
CELE_T07C4.4	spp-1	-0.950691	8.39701e-09	1750.74	2494.35	1800.07	2201.71	889.729	903.746	1244.06	1229.34
CELE_T01G9.3	dma-1	-2.00713	8.41776e-09	312.702	723.573	321.652	751.334	87.3353	86.5864	169.982	180.785
CELE_C48B4.3	C48B4.3	-1.98351	8.48531e-09	98.0257	183.881	107.217	216.502	25.1089	24.8936	41.4332	61.6797
CELE_F49E10.5	ctbp-1	-1.82991	8.48531e-09	327.406	695.991	325.587	703.63	96.0688	107.151	196.542	177.595
CELE_C01G6.1	aqp-2	-1.81808	8.48752e-09	10672.1	22343.4	10532.9	22758.4	3161.54	3258.9	6240.48	6143.51
CELE_T14B4.8	T14B4.8	-1.37883	8.51491e-09	159.782	285.935	147.547	266.04	69.8683	80.0924	93.4903	87.2023
CELE_T23F2.4	T23F2.4	-2.53794	8.51735e-09	28.4275	40.4539	20.6566	34.8604	4.36677	2.16466	5.31195	9.57098
CELE_Y66H1A.6	hum-8	0.493596	8.56346e-09	645.99	688.635	619.697	726.565	920.296	1003.32	933.84	918.814
CELE_F26D11.10	che-7	-2.2654	8.56346e-09	63.7167	145.266	63.937	159.624	17.4671	11.9056	28.6845	31.9033
CELE_F52G3.5	F52G3.5	-1.61812	8.57163e-09	95.085	194.914	110.168	205.493	41.4843	42.2109	53.1195	60.6162
CELE_C54G7.3	lgx-1	-1.99697	8.58335e-09	693.042	1636.54	649.206	1664.13	193.229	208.89	393.084	367.951
CELE_C06E1.8	ztf-30	-1.99564	8.61794e-09	83.3219	181.123	98.3646	200.906	20.7421	27.0583	46.7451	46.7915
CELE_Y95B8A.1	nas-30	-1.72389	8.65022e-09	487.188	1104.21	490.839	1155.9	194.321	209.972	305.968	270.114
CELE_R07B1.4	gst-36	0.703258	8.87598e-09	655.792	665.65	605.926	613.727	1183.39	1102.89	887.095	964.542
CELE_SSSD1.1	igcm-2	-1.93145	8.88428e-09	157.821	319.953	143.612	334.844	44.7593	43.2932	65.8682	96.7733
CELE_C34E11.2	C34E11.2	-2.0712	9.02959e-09	212.716	444.993	162.302	444.929	55.6763	47.6225	101.989	95.7098
CELE_F49D11.8	cpn-4	0.795378	9.07807e-09	829.298	565.435	697.405	562.354	1094.97	1134.28	1236.62	1138.95
CELE_K01A2.2	far-7	-1.65392	9.10543e-09	180.367	356.73	207.549	351.357	56.768	75.7631	116.863	98.9002
CELE_F17A9.3	atf-8	-2.23538	9.10543e-09	190.17	432.121	191.811	430.251	34.9341	40.0462	89.2407	99.9636
CELE_Y53H1B.1	cutl-10	-1.88888	9.15519e-09	160.762	387.07	167.22	360.53	53.4929	55.1988	83.9288	97.8367
CELE_C24A1.2	elf-1	-1.34414	9.20424e-09	233.301	462.461	260.666	455.02	122.269	134.209	152.984	146.755
CELE_F49E12.12	F49E12.12	-2.30766	9.21838e-09	76.4601	197.672	87.5445	232.097	20.7421	18.3996	42.4956	38.2839
CELE_T05B4.8	T05B4.8	-3.06923	9.21838e-09	27.4472	52.4062	20.6566	52.2907	3.27507	2.16466	5.31195	7.4441
CELE_Y38H6C.20	Y38H6C.20	-2.02418	9.26754e-09	48.0326	111.248	57.0515	111.003	21.8338	17.3173	16.9982	24.4592
CELE_Y41G9A.4	gbb-1	-1.70439	9.33017e-09	205.854	424.766	212.468	449.516	79.6935	73.5985	125.362	118.042
CELE_ZK265.3	nsph-2	0.93308	9.38963e-09	150.96	109.409	137.71	112.838	241.264	198.066	250.724	283.939
CELE_F54F11.1	F54F11.1	-2.73469	9.41835e-09	39.2103	56.0838	20.6566	62.3818	4.36677	6.49398	6.37434	9.57098
CELE_F20D6.10	F20D6.10	-1.63727	9.41835e-09	153.9	309.84	140.661	286.223	54.5846	64.9398	75.4297	91.4561
CELE_F25B4.8	F25B4.8	0.76933	9.4462e-09	148.019	160.896	162.302	160.542	259.823	288.982	266.66	261.607
CELE_T21B6.3	T21B6.3	-1.55498	9.47831e-09	1766.42	3582.01	1778.43	4127.29	816.585	850.712	1085.76	1077.27
CELE_F54F3.4	dhrs-4	0.483235	9.51036e-09	353.873	365.924	349.194	361.448	502.178	481.637	503.573	512.579
CELE_C50C3.9	unc-36	-1.5864	9.54209e-09	392.103	824.708	419.033	775.186	152.837	154.773	250.724	244.592
CELE_F48E8.1	lon-1	1.32715	9.57837e-09	617.562	355.81	571.498	358.696	1132.08	1108.31	1307.8	1226.15
CELE_K09B11.10	mam-3	-2.13881	9.59152e-09	179.387	410.055	164.269	391.721	34.9341	46.5402	92.4279	86.1388
CELE_F48C1.7	spe-11	0.997835	9.59308e-09	93.1245	67.1167	89.5118	76.1425	134.278	160.185	175.294	179.722
CELE_F47A4.1	lgc-47	-1.72364	9.622e-09	136.256	273.064	132.792	297.231	56.768	46.5402	79.6792	71.2507
CELE_F45D11.16	F45D11.16	-3.13888	9.66292e-09	16.6644	22.9852	28.5257	35.7778	2.18338	4.32932	1.06239	4.25377
CELE_ZC168.6	ssp-34	0.952664	9.90682e-09	140.177	84.5854	120.005	94.4901	231.439	206.725	215.665	194.61
CELE_F08G5.3	F08G5.3	-1.67957	9.90682e-09	178.407	304.324	135.743	346.77	60.043	64.9398	90.3031	86.1388
CELE_K04D7.4	ptrg-1	-1.73623	1.00876e-08	227.42	512.109	237.059	491.716	97.1605	75.7631	121.112	146.755
CELE_C05C10.4	pho-11	-0.457662	1.03323e-08	2909.4	3526.84	2956.84	3474.12	2351.5	2245.84	2391.44	2382.11
CELE_EEED8.2	EEED8.2	-1.40328	1.05754e-08	491.109	913.89	502.643	883.437	221.613	199.149	315.53	319.033
CELE_T20G5.2	cts-1	0.463652	1.05754e-08	19549.3	16329.6	19460.5	16150.5	25413.5	25308.1	23808.1	24054
CELE_ZC443.2	ZC443.2	-2.29547	1.05754e-08	49.0129	72.6331	35.4113	74.3078	7.64184	7.57631	20.1854	11.6979
CELE_Y34B4A.5	nspg-12	0.780301	1.06319e-08	132.335	107.571	116.07	132.103	183.404	222.96	206.104	225.45
CELE_Y54F10AM.5	ndua-8	0.272999	1.07573e-08	2085.01	1931.67	2073.53	1979.71	2423.55	2454.73	2460.49	2409.76
CELE_ZK1055.4	ZK1055.4	-2.38447	1.09006e-08	36.2695	91.9406	41.3131	104.581	10.9169	8.65864	14.8735	18.0785
CELE_F13H6.1	bcl-11	-1.62869	1.10019e-08	1609.58	3553.51	1624.98	3795.2	713.966	728.408	1007.15	973.05
CELE_H05G16.1	frm-3	-1.6077	1.11459e-08	379.36	801.722	370.835	832.064	173.579	163.432	212.478	232.894
CELE_ZK858.2	ZK858.2	0.977281	1.12803e-08	84.3021	76.3107	98.3646	61.4645	136.461	161.267	154.046	177.595
CELE_Y51H7C.1	Y51H7C.1	2.14976	1.13219e-08	595.016	175.607	544.94	198.154	1477.06	1344.25	2001.54	1891.86
CELE_Y18H1A.9	Y18H1A.9	-1.73553	1.14923e-08	204.874	469.817	221.32	453.186	73.1433	83.3394	115.8	132.93
CELE_T07H6.1	cest-16	-2.13216	1.14972e-08	160.762	371.44	130.825	336.678	34.9341	38.9639	77.5544	76.5679
CELE_C35D10.11	msd-4	0.699813	1.15486e-08	293.097	234.449	300.996	215.584	403.926	440.508	420.706	428.567
CELE_K07F5.11	ssq-1	0.872408	1.15739e-08	844.982	541.53	749.538	592.627	1135.36	1158.09	1364.11	1335.68
CELE_F13E9.11	F13E9.11	-1.84142	1.15958e-08	1287.08	2750.86	1302.35	2737.46	372.267	378.816	767.045	735.902
CELE_C54C8.4	C54C8.4	-2.55074	1.16017e-08	38.23	69.8749	27.5421	58.7123	3.27507	4.32932	13.8111	11.6979
CELE_F10D2.2	ugt-39	1.04678	1.1644e-08	92.1442	91.9406	113.119	63.2992	184.496	168.844	190.168	199.927
CELE_F43E2.3	insc-1	-1.69004	1.16746e-08	312.702	660.134	321.652	690.787	117.903	117.974	199.729	179.722
CELE_D1044.2	dex-1	-1.64712	1.16749e-08	1082.2	2340.81	1147.92	2240.24	409.384	401.545	648.058	715.697
CELE_F37D6.6	tag-68	-1.51198	1.1723e-08	175.466	365.924	190.827	341.265	74.235	82.2571	107.301	112.725
CELE_W05E10.3	ceh-32	-1.28163	1.19735e-08	708.726	1278.89	791.835	1346.71	351.525	367.992	495.074	482.803
CELE_T07D1.1	gcy-31	-1.61189	1.19735e-08	43.1313	56.0838	43.2804	54.1254	9.82522	16.235	20.1854	18.0785
CELE_ZK867.1	syd-9	-1.69054	1.19735e-08	1092.99	2351.84	1195.13	2398.95	411.568	382.063	686.304	700.809
CELE_ZK154.1	ZK154.1	-2.13104	1.20244e-08	402.886	855.048	394.442	835.733	81.8769	75.7631	199.729	210.562
CELE_F47B8.5	F47B8.5	-2.2849	1.21028e-08	41.1708	94.6989	37.3786	82.5642	10.9169	8.65864	19.123	13.8248
CELE_ZK678.8	bus-17	-2.02677	1.21028e-08	132.335	259.273	112.136	242.188	25.1089	32.4699	61.6186	63.8066
CELE_C32E12.2	pde-5	-2.21322	1.21062e-08	49.0129	79.9884	33.444	100.912	9.82522	14.0703	16.9982	15.9516
CELE_F55B11.2	F55B11.2	0.41211	1.24741e-08	2489.85	2299.44	2490.59	2102.64	3222.67	3122.52	3075.62	3061.65
CELE_K10C2.5	grl-6	-2.40518	1.2481e-08	39.2103	89.1824	41.3131	102.747	10.9169	8.65864	14.8735	17.0151
CELE_E02H9.5	klo-2	1.05761	1.2503e-08	267.61	206.866	245.912	189.898	558.946	527.095	389.897	417.933
CELE_F41C6.5	col-173	1.36176	1.266e-08	33.3288	45.0509	45.2477	36.6952	92.7938	72.5161	128.549	118.042
CELE_K08H2.1	skr-21	-1.30764	1.28816e-08	684.22	1212.7	771.179	1254.98	313.315	318.205	495.074	458.344
CELE_F35H12.1	F35H12.1	-2.01165	1.29103e-08	76.4601	120.442	67.8716	154.12	19.6504	12.988	32.9341	38.2839
CELE_F59C12.1	cdh-9	-1.95329	1.29458e-08	258.788	658.295	311.816	637.579	87.3353	74.6808	156.171	163.77
CELE_Y73B6BL.42	acr-25	-1.82682	1.29535e-08	46.0721	104.812	52.1332	93.5728	17.4671	20.5643	21.2478	24.4592
CELE_C38D4.8	arl-6	-2.2729	1.30884e-08	55.8747	113.087	47.215	88.9859	6.55015	10.8233	19.123	26.5861
CELE_K01D12.3	K01D12.3	-2.40522	1.31707e-08	36.2695	89.1824	41.3131	77.0599	7.64184	5.41165	20.1854	12.7613
CELE_ZK813.7	ZK813.7	0.495085	1.31707e-08	5624.72	4768.96	5954.01	5023.57	8055.59	7601.21	7371.92	7089.97
CELE_Y71G12B.20	mab-20	-0.850181	1.32089e-08	1991.88	2718.68	1814.83	2727.37	1188.85	1173.25	1370.48	1400.55
CELE_F20B10.3	F20B10.3	-2.22744	1.32285e-08	97.0455	212.383	72.7898	204.576	20.7421	21.6466	46.7451	36.157
CELE_F22E10.1	pgp-12	1.17143	1.32551e-08	37.2498	56.0838	44.2641	49.5385	108.077	101.739	122.175	90.3926
CELE_E04F6.10	E04F6.10	-1.76905	1.32813e-08	42.1511	76.3107	48.1987	81.6468	14.192	16.235	20.1854	22.3323
CELE_F53B1.6	swip-10	-1.66346	1.33663e-08	147.039	246.401	125.907	237.601	44.7593	41.1286	63.7434	89.3292
CELE_F13B12.4	F13B12.4	-1.74449	1.35563e-08	110.769	228.013	101.316	202.741	36.0258	38.9639	61.6186	55.299
CELE_ZK822.1	ZK822.1	-1.94411	1.3736e-08	217.617	480.85	228.206	532.08	58.9513	69.2691	118.988	131.867
CELE_C06G1.1	C06G1.1	-1.62148	1.37769e-08	444.057	952.505	425.919	963.249	180.129	204.56	287.908	232.894
CELE_F45E10.1	unc-53	-1.66742	1.37813e-08	1100.83	2323.34	1145.95	2506.28	446.502	405.874	657.619	717.824
CELE_C25E10.9	swm-1	0.795837	1.38601e-08	148.999	164.574	132.792	153.202	234.714	230.536	303.843	272.241
CELE_W06F12.2	W06F12.2	-1.53494	1.4039e-08	1574.29	3345.72	1625.97	3324.59	766.367	637.493	991.209	1011.33
CELE_C10G8.6	ceh-34	-1.60323	1.41172e-08	304.86	565.435	273.454	586.206	122.269	102.821	168.92	175.468
CELE_F26A1.8	F26A1.8	2.40052	1.41328e-08	9.80257	13.7911	4.91823	13.7607	76.4184	76.8455	32.9341	38.2839
CELE_C04G2.7	egl-38	-2.04063	1.4241e-08	112.73	281.338	128.858	301.818	43.6677	32.4699	62.681	61.6797
CELE_C15F1.7	sod-1	0.5666	1.44129e-08	4112.18	3242.75	3870.65	3054.88	5243.39	5349.96	5234.39	5319.34
CELE_F59B2.9	F59B2.9	-1.65515	1.45819e-08	112.73	204.108	82.6263	185.311	45.851	43.2932	57.369	39.3474
CELE_F11F1.1	F11F1.1	1.01833	1.45876e-08	100.967	68.9555	98.3646	78.8947	180.129	174.255	166.795	180.785
CELE_F55B12.1	ceh-24	-2.19351	1.47837e-08	41.1708	85.5048	53.1169	104.581	8.73353	18.3996	21.2478	13.8248
CELE_W05G11.3	col-88	1.09416	1.51018e-08	535.221	393.506	487.888	382.547	989.072	952.451	995.459	902.863
CELE_C06B3.7	C06B3.7	1.62475	1.51118e-08	20.5854	15.6299	12.7874	12.8433	58.9513	46.5402	44.6204	40.4108
CELE_F10C1.5	dmd-5	-1.49806	1.52709e-08	106.848	173.768	96.3973	167.881	31.6591	45.4579	66.9305	48.9184
CELE_T28F2.5	ccb-1	-1.4525	1.52973e-08	544.043	966.296	509.529	1017.37	217.247	225.125	352.713	314.779
CELE_Y37E3.13	iglr-3	-1.56882	1.54113e-08	209.775	425.685	203.615	421.077	81.8769	101.739	103.052	138.248
CELE_Y53C10A.4	rga-2	-2.0174	1.54801e-08	825.377	1918.8	854.789	1912.74	209.605	212.137	480.2	459.407
CELE_R07B1.1	vab-15	-1.32151	1.55154e-08	121.552	228.013	141.645	238.519	69.8683	75.7631	71.1801	75.5044
CELE_F56D12.4	jip-1	-1.33034	1.56067e-08	259.768	456.026	250.83	482.542	125.545	136.374	157.234	157.389
CELE_Y45F10C.2	Y45F10C.2	1.00973	1.56302e-08	204.874	111.248	201.647	160.542	363.533	310.629	356.963	332.858
CELE_C17H12.12	C17H12.12	1.01989	1.56719e-08	83.3219	57.9226	58.0351	55.9602	118.994	117.974	130.674	148.882
CELE_T07G12.3	T07G12.3	-2.52488	1.57259e-08	91.1639	261.111	129.841	244.023	10.9169	20.5643	42.4956	52.1087
CELE_F58G1.4	dct-18	0.498551	1.60615e-08	3078.99	3643.61	3100.45	3765.85	5004.31	4952.74	4742.51	4501.55
CELE_ZC416.6	ltah-1.2	0.578634	1.61729e-08	1964.44	1842.49	1897.45	1764.12	3185.56	2989.4	2526.36	2452.3
CELE_R01E6.2	R01E6.2	-2.30364	1.62082e-08	36.2695	79.9884	40.3295	70.6383	5.45846	7.57631	15.9358	17.0151
CELE_T21H3.2	ptr-16	-1.76431	1.62313e-08	343.09	688.635	322.636	687.118	106.986	101.739	199.729	192.483
CELE_C48D5.2	ptp-1	-1.56511	1.64565e-08	920.462	1985	971.842	1942.09	405.018	372.322	572.628	616.797
CELE_T24B8.1	rpl-32	0.353933	1.65095e-08	24286.9	22023.5	23982.3	21075.9	30310.8	29106	29374	27979.2
CELE_F14D12.4	mec-2	-1.84014	1.66633e-08	188.209	406.378	178.04	389.887	66.5932	49.7872	111.551	96.7733
CELE_F53F8.7	F53F8.7	-1.63425	1.66645e-08	34.309	52.4062	48.1987	61.4645	16.3754	12.988	15.9358	18.0785
CELE_ZK892.1	lec-3	-1.42317	1.66668e-08	1639.97	3309.86	1625.97	3421.83	841.694	810.665	1028.39	1047.49
CELE_M03F4.7	calu-1	0.300427	1.67233e-08	6673.59	7208.15	6516.66	7141.8	8073.06	8434.6	8734.97	8675.56
CELE_Y67D8C.9	Y67D8C.9	-1.60588	1.68979e-08	389.162	760.349	339.358	720.143	136.461	145.032	217.79	226.513
CELE_F26B1.4	col-58	-1.75266	1.69516e-08	166.644	344.777	167.22	376.126	63.3181	57.3635	100.927	91.4561
CELE_C05E7.1	gmap-2	-1.76666	1.70333e-08	202.913	477.172	227.222	478.872	85.1519	72.5161	134.923	114.852
CELE_Y71G12B.22	Y71G12B.22	1.71179	1.74058e-08	28.4275	13.7911	18.6893	11.0086	60.043	48.7049	67.9929	57.4259
CELE_F31E8.2	snt-1	-1.73136	1.77592e-08	295.058	698.749	302.963	733.904	125.545	141.785	185.918	158.453
CELE_T19C4.1	T19C4.1	-1.87155	1.77592e-08	334.268	847.693	409.197	819.22	110.261	116.892	218.852	212.689
CELE_K10B3.7	gpd-3	0.620612	1.79927e-08	8043.99	9072.7	8082.62	8871.06	11459.5	11347.2	14615.3	14962.6
CELE_T23H2.4	mam-8	-2.29939	1.8033e-08	51.9536	114.926	41.3131	113.755	15.2837	11.9056	12.7487	25.5226
CELE_C27H5.1	pdl-1	-1.89386	1.80337e-08	106.848	227.093	93.4464	250.445	43.6677	37.8816	61.6186	39.3474
CELE_M03B6.3	M03B6.3	-2.36061	1.82866e-08	567.569	1514.26	618.713	1506.34	112.444	103.904	284.72	317.969
CELE_F32H2.9	tba-6	-2.59543	1.84029e-08	40.1906	88.263	27.5421	83.4816	5.45846	8.65864	14.8735	10.6344
CELE_C31H5.3	acr-19	-2.20775	1.84425e-08	34.309	82.7466	39.3458	71.5556	16.3754	7.57631	11.6863	13.8248
CELE_D1025.6	nspc-16	0.828859	1.85308e-08	99.9863	134.233	116.07	110.086	189.954	179.667	242.225	206.308
CELE_F15B9.8	F15B9.8	-1.79888	1.90391e-08	759.7	1559.31	702.323	1506.34	225.98	212.137	420.706	442.392
CELE_R13A1.4	unc-8	-2.52747	1.91084e-08	42.1511	118.603	56.0678	110.086	6.55015	7.57631	23.3726	19.142
CELE_W02D7.2	clec-218	-0.848072	1.9218e-08	418.57	285.016	407.23	328.422	180.129	174.255	226.289	218.006
CELE_Y17D7C.3	Y17D7C.3	-0.911654	1.9218e-08	222.518	299.727	211.484	265.123	109.169	115.809	155.109	151.009
CELE_F11D5.3	ddr-2	-1.53053	1.9218e-08	474.445	995.717	494.774	931.141	200.871	191.572	302.781	307.335
CELE_F41C6.1	unc-6	-1.40654	1.9218e-08	546.984	1052.72	548.875	1032.97	241.264	251.101	365.462	342.429
CELE_F54D8.2	cox-6A	0.278556	1.9405e-08	5921.74	5462.19	5716.95	5528.13	6765.21	6805.69	7020.27	6854.95
CELE_K08D8.12	K08D8.12	1.58443	1.95225e-08	21.5657	18.3881	15.7383	14.6781	50.2178	66.0221	48.8699	45.728
CELE_Y71A12B.18	Y71A12B.18	-1.32993	1.95384e-08	155.861	285.016	169.187	290.809	89.5187	68.1868	103.052	97.8367
CELE_C05C12.5	C05C12.5	1.1495	1.98448e-08	42.1511	31.2598	49.1823	36.6952	73.1433	89.8334	100.927	88.2657
CELE_F27C1.11	F27C1.11	-1.74018	1.99159e-08	48.0326	92.8601	61.9697	87.1511	17.4671	16.235	21.2478	31.9033
CELE_F42G2.4	fbxa-182	1.02166	2.01045e-08	67.6378	68.0361	68.8552	79.8121	116.811	135.291	154.046	171.214
CELE_M03C11.1	M03C11.1	-1.6216	2.02486e-08	178.407	358.569	137.71	322.918	70.9599	85.5041	92.4279	75.5044
CELE_C44B7.3	aff-1	-1.74403	2.03463e-08	117.631	259.273	109.185	243.106	46.9427	44.3755	69.0553	57.4259
CELE_F26A10.2	F26A10.2	-1.81188	2.03491e-08	763.621	1631.95	758.391	1720.09	246.722	232.701	457.89	450.9
CELE_C06G3.6	gldi-4	-1.17567	2.03653e-08	1136.12	1946.38	1160.7	1960.44	591.697	602.858	738.361	813.534
CELE_C50B6.4	col-161	0.992486	2.03653e-08	910.659	804.481	957.088	753.169	1695.4	1593.19	1781.63	1744.05
CELE_B0403.4	pdi-6	0.19784	2.05147e-08	6897.09	6991.17	6965.2	7221.62	8064.32	8079.6	8112.41	7947.11
CELE_F10G2.3	clec-7	0.544008	2.07312e-08	308.781	328.228	273.454	348.604	447.593	440.508	457.89	491.31
CELE_F43C1.1	phlp-2	-1.69786	2.07532e-08	64.697	125.959	56.0678	104.581	24.0172	24.8936	32.9341	26.5861
CELE_T01B6.1	T01B6.1	-1.82326	2.11575e-08	285.255	575.548	287.225	588.041	92.7938	71.4338	145.547	180.785
CELE_F26D10.11	lhfp-4	-2.21413	2.11695e-08	74.4996	177.445	75.7408	149.533	24.0172	9.74097	41.4332	27.6495
CELE_F17B5.6	F17B5.6	-2.14987	2.13382e-08	42.1511	78.1495	54.1005	96.3249	7.64184	8.65864	26.5597	18.0785
CELE_F29G6.2	ccdc-149	-1.52259	2.13948e-08	55.8747	117.684	69.8389	95.4075	27.2923	24.8936	35.0589	30.8398
CELE_C01G12.8	catp-4	0.80073	2.16281e-08	157.821	146.186	190.827	146.781	272.923	277.077	292.157	274.368
CELE_C48B4.13	C48B4.13	-2.31325	2.16635e-08	34.309	79.069	29.5094	65.134	14.192	9.74097	9.56151	8.50754
CELE_F13D11.2	hbl-1	-1.97039	2.16635e-08	3308.37	7923.44	3324.72	7973.87	914.837	963.274	1835.81	2035.43
CELE_K10D3.4	K10D3.4	-1.82843	2.17779e-08	1577.23	3669.35	1612.2	3584.2	508.728	516.272	899.844	1015.59
CELE_B0393.5	B0393.5	-1.98164	2.18881e-08	575.411	1318.43	581.335	1359.56	156.112	152.609	324.029	338.175
CELE_Y16B4A.1	unc-3	-1.92951	2.18881e-08	187.229	433.04	197.713	410.069	48.0344	66.0221	122.175	86.1388
CELE_Y38F2AL.2	mksr-2	-2.27474	2.20908e-08	52.9339	123.2	41.3131	109.168	10.9169	15.1526	24.435	17.0151
CELE_F17B5.1	F17B5.1	-1.8173	2.21705e-08	87.2429	171.929	94.43	155.955	27.2923	19.4819	52.0571	45.728
CELE_C07A9.5	C07A9.5	-3.23633	2.22202e-08	24.5064	70.7943	25.5748	70.6383	2.18338	1.08233	7.43673	9.57098
CELE_T05E11.9	T05E11.9	-1.34631	2.23607e-08	4611.13	8569.79	4592.64	8640.8	2137.53	2124.61	3026.75	3099.94
CELE_R10D12.1	R10D12.1	-1.08482	2.23969e-08	140.177	216.061	151.482	230.262	98.2522	82.2571	80.7416	87.2023
CELE_F52E4.6	wrt-2	-2.2532	2.26279e-08	1093.97	2278.29	1151.85	2801.68	225.98	178.584	574.753	557.244
CELE_Y47D3A.31	Y47D3A.31	1.02905	2.27555e-08	53.9142	41.3733	51.1496	44.0342	97.1605	82.2571	100.927	107.408
CELE_F38B6.2	F38B6.2	-2.75847	2.31034e-08	37.2498	76.3107	20.6566	54.1254	2.18338	6.49398	10.6239	8.50754
CELE_C02D5.1	acdh-6	-1.725	2.31205e-08	100.967	278.58	140.661	249.527	56.768	46.5402	61.6186	68.0603
CELE_F59D6.7	chpf-2	-1.45588	2.36111e-08	77.4403	140.669	87.5445	126.598	31.6591	32.4699	50.9947	42.5377
CELE_C09E10.2	dgk-1	-1.57181	2.40918e-08	435.234	927.681	444.608	911.876	179.037	194.819	284.72	256.29
CELE_K01A2.3	K01A2.3	-1.67331	2.44154e-08	143.118	329.148	169.187	333.009	60.043	60.6105	89.2407	95.7098
CELE_K08B12.1	K08B12.1	-2.16608	2.46458e-08	520.517	1179.6	559.695	1171.49	97.1605	107.151	294.282	265.861
CELE_Y54G2A.8	clec-82	-1.93159	2.51251e-08	43.1313	68.0361	37.3786	80.7294	14.192	22.7289	8.49912	14.8882
CELE_T25F10.5	bbs-8	-1.78725	2.53026e-08	70.5785	145.266	58.0351	118.342	25.1089	22.7289	28.6845	37.2205
CELE_F19C7.8	F19C7.8	-1.7161	2.53136e-08	213.696	500.157	208.533	512.815	100.436	97.4097	128.549	110.598
CELE_W05H12.1	W05H12.1	-1.69797	2.54501e-08	573.451	1280.73	526.251	1262.31	225.98	225.125	349.526	322.223
CELE_Y47D7A.12	Y47D7A.12	-3.03555	2.55702e-08	22.5459	41.3733	24.5912	43.1169	1.09169	1.08233	6.37434	7.4441
CELE_C08E8.3	C08E8.3	2.83259	2.55906e-08	3.92103	17.4687	4.91823	21.0997	122.269	115.809	60.5562	41.4743
CELE_C54D1.2	clec-86	1.17058	2.57324e-08	42.1511	45.0509	68.8552	54.1254	120.086	98.4921	132.799	121.232
CELE_ZK328.7	ift-139	-1.88048	2.57871e-08	64.697	105.732	72.7898	139.442	21.8338	14.0703	36.1212	31.9033
CELE_K02C4.4	ltd-1	-1.54107	2.59165e-08	527.379	1065.59	529.202	1021.96	195.413	218.631	351.651	314.779
CELE_Y73B6BL.47	Y73B6BL.47	-2.32409	2.60234e-08	50.9734	113.087	39.3458	97.2423	16.3754	7.57631	23.3726	12.7613
CELE_T22A3.4	set-18	-1.83504	2.62591e-08	432.294	963.538	463.297	1026.55	148.47	132.044	242.225	286.066
CELE_F39D8.3	F39D8.3	-2.13454	2.62591e-08	49.9931	161.816	78.6917	128.433	18.5588	19.4819	22.3102	35.0936
CELE_F45E4.7	nep-16	-2.25596	2.66226e-08	82.3416	224.335	90.4954	200.906	17.4671	19.4819	44.6204	43.6011
CELE_C35E7.2	C35E7.2	-1.71302	2.67291e-08	167.624	358.569	143.612	332.092	61.1347	63.8575	82.8664	97.8367
CELE_Y55F3C.7	cutl-26	-1.38764	2.67367e-08	352.893	657.376	382.638	734.821	158.295	195.902	243.287	215.879
CELE_W03D2.9	W03D2.9	-2.14472	2.67776e-08	31.3682	94.6989	56.0678	88.0685	13.1003	12.988	22.3102	12.7613
CELE_C04F12.4	rpl-14	0.303517	2.69485e-08	21548	20128.6	20846.4	19313.6	25255.2	25690.2	25620.6	24430.5
CELE_H05L14.1	H05L14.1	1.02795	2.70805e-08	58.8154	51.4868	60.0024	52.2907	90.6104	126.633	123.237	112.725
CELE_K05F6.10	K05F6.10	-2.89831	2.71522e-08	21.5657	37.6957	15.7383	36.6952	3.27507	2.16466	7.43673	2.12689
CELE_Y113G7A.6	ttx-1	-1.49164	2.7235e-08	291.136	572.79	273.454	560.519	121.178	128.797	189.105	164.834
CELE_Y74E4A.1	lgc-27	-1.94849	2.74515e-08	337.209	905.615	360.998	831.146	99.3439	122.303	207.166	202.054
CELE_T28D9.7	del-10	-1.30078	2.75334e-08	159.782	300.646	171.154	251.362	91.7021	66.0221	106.239	94.6464
CELE_B0507.1	B0507.1	-1.8905	2.78785e-08	229.38	527.739	227.222	512.815	65.5015	74.6808	117.925	145.692
CELE_R08C7.4	R08C7.4	-2.71453	2.80217e-08	45.0918	73.5525	27.5421	92.6554	3.27507	6.49398	8.49912	18.0785
CELE_F55A4.2	nlf-1	-1.82094	2.81388e-08	302.9	649.101	313.783	644.918	77.5101	108.233	161.483	193.547
CELE_C10F3.3	acy-2	-1.7617	2.82905e-08	49.0129	85.5048	48.1987	75.2252	13.1003	16.235	28.6845	18.0785
CELE_Y41E3.3	atln-2	-1.60775	2.86178e-08	126.453	241.804	137.71	275.214	54.5846	53.0342	77.5544	71.2507
CELE_R10E12.2	R10E12.2	-1.07091	2.87052e-08	514.635	789.77	534.12	901.785	300.215	301.97	325.091	377.522
CELE_Y46G5A.30	snf-5	0.774917	2.88939e-08	280.354	209.625	258.699	200.906	391.917	361.498	437.704	431.758
CELE_T05A7.13	T05A7.13	-1.81784	2.88986e-08	89.2034	159.977	83.6099	169.715	31.6591	20.5643	54.1819	36.157
CELE_Y16B4A.2	Y16B4A.2	1.00167	2.89135e-08	2806.48	2341.73	2898.81	2500.78	5611.29	5571.84	4905.05	5031.15
CELE_C40C9.5	nlg-1	-1.49935	2.90623e-08	400.925	825.627	402.311	886.189	196.504	191.572	233.726	267.988
CELE_F57B1.6	F57B1.6	-2.03958	2.90922e-08	99.006	251.917	123.939	233.932	30.5674	24.8936	61.6186	55.299
CELE_F01D5.10	F01D5.10	-1.99427	2.96375e-08	97.0455	203.189	71.8062	199.989	24.0172	30.3052	43.558	45.728
CELE_Y71H10A.1	pfk-1.1	0.289224	3.00018e-08	2507.5	2402.41	2490.59	2379.68	2954.12	2879	2930.07	3186.07
CELE_ZK792.4	ZK792.4	-1.59634	3.03478e-08	107.828	206.866	89.5118	196.319	53.4929	44.3755	55.2443	45.728
CELE_T19A5.3	T19A5.3	-2.0484	3.04741e-08	811.653	1902.25	850.854	1941.18	195.413	200.231	469.576	465.788
CELE_K04D7.3	gta-1	0.439813	3.08901e-08	4749.35	3878.06	4582.81	4018.12	5624.39	5717.95	6064.12	5959.53
CELE_T24C12.3	T24C12.3	0.545864	3.11436e-08	291.136	275.822	335.423	260.536	431.218	404.792	420.706	439.202
CELE_C04F6.3	cht-1	-0.476528	3.13908e-08	3300.53	3738.31	3380.79	4114.45	2561.11	2477.45	2692.1	2716.03
CELE_Y105E8A.5	bbs-1	-2.0836	3.15274e-08	50.9734	127.797	67.8716	139.442	17.4671	17.3173	26.5597	29.7764
CELE_ZK512.9	grl-11	-3.21265	3.19063e-08	25.4867	45.0509	15.7383	33.0257	3.27507	4.32932	4.24956	1.06344
CELE_W03G11.1	col-181	1.30358	3.19711e-08	28378.5	14199.3	27566.7	14122.1	49214.5	49584.8	55539.6	53663.4
CELE_K07F5.9	ssp-10	0.904907	3.23155e-08	217.617	146.186	192.795	136.69	287.115	309.546	358.025	341.365
CELE_ZK616.9	spp-7	-2.33689	3.24348e-08	61.7562	141.589	56.0678	119.259	12.0086	10.8233	15.9358	36.157
CELE_C15A11.3	sol-1	-2.0292	3.25599e-08	105.868	208.705	72.7898	207.328	24.0172	29.2229	53.1195	39.3474
CELE_T08B6.4	T08B6.4	0.787792	3.27805e-08	232.321	167.332	212.468	168.798	351.525	296.558	352.713	345.619
CELE_C34C6.7	cup-16	-1.59585	3.29293e-08	255.847	584.743	237.059	552.263	139.737	122.303	138.111	139.311
CELE_C33G3.1	dyc-1	-1.61512	3.31602e-08	359.754	747.477	322.636	728.4	144.103	138.538	195.48	226.513
CELE_Y54E10A.17	Y54E10A.17	0.686286	3.33688e-08	413.669	351.213	420.017	385.3	563.313	586.623	696.928	678.476
CELE_C18E9.5	C18E9.5	0.947216	3.35032e-08	431.313	376.957	385.589	383.465	840.602	848.547	653.37	698.682
CELE_T26C12.4	gcy-23	-1.89711	3.35032e-08	64.697	136.992	51.1496	99.077	24.0172	27.0583	21.2478	22.3323
CELE_F58B3.9	ttr-50	-0.8894	3.35032e-08	5023.82	6893.71	4872.98	6761.09	2716.13	2686.34	3682.24	3629.53
CELE_C50F2.8	magu-3	-1.94345	3.38761e-08	287.215	639.907	270.503	626.571	75.3267	76.8455	150.859	171.214
CELE_Y106G6G.2	Y106G6G.2	-1.63723	3.40278e-08	133.315	290.532	159.351	287.14	58.9513	48.7049	78.6168	93.5829
CELE_Y22F5A.3	ric-4	-1.24195	3.45234e-08	560.707	1028.82	556.744	1034.8	306.765	296.558	367.587	374.332
CELE_C04G2.9	nsph-3.2	0.837538	3.46552e-08	983.198	672.086	955.12	669.687	1328.59	1451.4	1580.84	1498.39
CELE_Y105E8A.4	ech-7	0.487963	3.52917e-08	1529.2	1458.18	1446.94	1388	1930.11	1791.26	2202.33	2240.67
CELE_C16A3.5	C16A3.5	0.398851	3.54977e-08	4155.31	3593.04	3939.5	3670.44	5135.32	5257.96	5037.85	4816.33
CELE_K06H7.2	K06H7.2	-0.844163	3.55614e-08	190.17	241.804	198.697	226.593	98.2522	113.645	131.736	133.994
CELE_F41G3.3	F41G3.3	-2.12624	3.58189e-08	114.69	260.192	108.201	269.71	33.8424	21.6466	49.9323	66.9969
CELE_W03G11.4	W03G11.4	-1.68463	3.5931e-08	1223.36	2694.78	1227.59	2781.5	441.043	482.719	765.983	776.313
CELE_F07H5.2	sgn-1	-1.47276	3.62396e-08	175.466	342.019	174.105	320.166	68.7766	80.0924	115.8	99.9636
CELE_F46E10.2	F46E10.2	-1.26286	3.63966e-08	1024.37	1672.4	929.546	1654.04	410.476	478.39	652.307	659.334
CELE_F14H3.12	F14H3.12	0.799468	3.64128e-08	89.2034	82.7466	84.5936	110.086	177.946	161.267	142.36	157.389
CELE_F15A2.1	col-184	1.2689	3.65101e-08	17268.2	8995.47	16579.4	8905.01	29486.6	28895	33320.8	32996.5
CELE_H28O16.1	atp-1	0.437963	3.67561e-08	50814.6	42794.7	50449.2	41799.5	65050.6	63476.5	60827.1	62423
CELE_C33F10.11	C33F10.11	1.13471	3.71162e-08	78.4206	57.0032	79.6753	55.9602	144.103	124.468	147.672	177.595
CELE_C18F3.4	nsy-7	-0.835078	3.79065e-08	444.057	628.874	472.15	595.38	258.731	277.077	332.528	331.794
CELE_B0024.8	che-12	-2.11403	3.79309e-08	110.769	271.225	105.25	250.445	40.3926	19.4819	47.8075	62.7431
CELE_C47A4.2	ent-4	0.704137	3.82872e-08	261.729	257.434	273.454	279.801	470.519	501.119	383.523	392.41
CELE_R08E3.4	ztf-16	-1.3375	3.84198e-08	560.707	1096.85	555.76	1074.25	310.04	263.006	359.088	369.015
CELE_Y37D8A.3	Y37D8A.3	0.939493	3.86256e-08	180.367	146.186	176.073	115.59	263.098	254.348	325.091	341.365
CELE_T28C12.6	T28C12.6	-1.80552	3.87309e-08	52.9339	119.523	64.9206	130.268	28.384	24.8936	22.3102	29.7764
CELE_T09A5.2	klp-3	-1.14629	3.88238e-08	463.662	774.14	444.608	732.987	244.539	225.125	297.469	324.35
CELE_T28F3.6	ifta-2	-2.15713	3.91727e-08	41.1708	83.666	36.3949	63.2992	6.55015	11.9056	16.9982	14.8882
CELE_C35A5.5	C35A5.5	-2.32625	3.97105e-08	26.467	71.7137	43.2804	73.3904	8.73353	5.41165	11.6863	17.0151
CELE_T01D1.6	abu-11	-1.55172	3.98816e-08	463.662	872.517	469.199	998.109	168.12	212.137	300.656	275.432
CELE_Y57G11A.1	tag-273	-1.70333	3.98816e-08	2392.81	5115.58	2445.34	5161.18	771.826	861.535	1472.47	1535.61
CELE_F54E2.2	F54E2.2	-2.07773	3.98951e-08	53.9142	123.2	59.0188	107.333	13.1003	11.9056	33.9965	22.3323
CELE_C27F2.2	nca-2	-1.56623	4.03919e-08	101.947	193.075	99.3483	187.146	43.6677	49.7872	56.3066	46.7915
CELE_T28H11.5	ssq-2	0.827725	4.12297e-08	950.85	627.035	933.48	677.026	1358.06	1317.2	1491.59	1489.88
CELE_C46C11.3	C46C11.3	-1.37735	4.12641e-08	221.538	392.587	193.778	404.565	98.2522	109.315	129.612	129.74
CELE_K03B8.6	K03B8.6	-1.48376	4.1394e-08	388.182	732.767	374.769	810.964	173.579	163.432	242.225	245.655
CELE_F27C1.4	F27C1.4	-0.704908	4.15044e-08	234.282	260.192	228.206	285.305	153.928	138.538	169.982	156.326
CELE_Y7A5A.1	Y7A5A.1	0.369981	4.15677e-08	951.83	987.443	1030.86	957.745	1227.06	1202.47	1307.8	1337.81
CELE_Y71H2AM.5	cox-6B	0.451187	4.18153e-08	7440.15	6770.51	7485.55	6780.36	9406.01	10198.8	9769.73	9556.09
CELE_H22K11.1	asp-3	0.746391	4.19173e-08	34162	45919.8	33251.2	44825	69544	71183.8	61778	62820.7
CELE_Y2H9A.3	col-162	1.03113	4.20346e-08	567.569	490.044	581.335	482.542	1130.99	1076.92	1030.52	1096.41
CELE_F49E10.2	F49E10.2	-1.89342	4.20494e-08	218.597	486.366	222.304	532.998	68.7766	63.8575	128.549	131.867
CELE_Y69A2AR.19	Y69A2AR.19	0.821132	4.20653e-08	140.177	108.49	130.825	120.177	208.513	194.819	233.726	244.592
CELE_T23F2.13	bus-8A	-2.26666	4.25086e-08	142.137	267.547	115.087	293.562	20.7421	23.8113	59.4938	65.9334
CELE_ZK1225.6	ssp-31	1.20817	4.25377e-08	42.1511	29.421	52.1332	33.9431	80.7852	79.0101	109.426	93.5829
CELE_F23F12.8	chtb-2	-1.91657	4.25377e-08	103.907	239.965	108.201	231.18	30.5674	30.3052	65.8682	54.2356
CELE_C06A8.3	srlf-1	0.664324	4.2548e-08	8144.96	6557.21	8151.48	6600.55	10963.9	10892.6	12320.5	12500.8
CELE_C26C6.7	glb-8	-1.66831	4.30548e-08	60.776	116.765	65.9043	107.333	22.9255	18.3996	36.1212	32.9667
CELE_C14F11.5	hsp-43	0.644785	4.3491e-08	988.1	870.678	1036.76	939.397	1332.96	1278.23	1688.14	1695.13
CELE_Y39B6A.8	cpg-23	-2.28171	4.35831e-08	38.23	100.215	66.8879	91.738	7.64184	16.235	11.6863	25.5226
CELE_B0391.11	fbxa-152	-6.44823	4.38415e-08	23.5262	41.3733	14.7547	33.9431	1.09169	0	0	0
CELE_K03H1.10	cbp-2	0.596911	4.39817e-08	296.038	367.763	294.11	321.083	516.37	444.838	464.264	510.452
CELE_F02D8.2	grd-12	-2.4574	4.39817e-08	45.0918	102.054	35.4113	105.499	8.73353	6.49398	20.1854	17.0151
CELE_C33F10.12	C33F10.12	1.01117	4.41623e-08	71.5588	40.4539	68.8552	59.6297	109.169	114.727	132.799	126.55
CELE_F01E11.1	ugt-57	-1.62695	4.42192e-08	261.729	496.479	240.01	547.676	91.7021	98.4921	151.922	158.453
CELE_W10C4.1	W10C4.1	-1.89457	4.42389e-08	63.7167	151.702	76.7244	166.046	18.5588	31.3876	37.1836	36.157
CELE_C11D9.1	tiam-1	-1.44868	4.43533e-08	195.071	399.942	197.713	390.804	100.436	97.4097	115.8	120.169
CELE_Y71G12B.35	Y71G12B.35	-1.06371	4.43546e-08	88.2232	115.845	96.3973	108.251	55.6763	58.4458	40.3708	41.4743
CELE_ZK836.1	lon-3	1.46203	4.43612e-08	112.73	117.684	129.841	109.168	243.447	189.408	412.207	447.709
CELE_UNC-17	unc-17	-1.5189	4.46848e-08	199.973	386.151	181.975	425.664	102.619	94.1627	116.863	103.154
CELE_T06G6.3	T06G6.3	-2.17707	4.50279e-08	50.9734	133.314	47.215	112.838	13.1003	22.7289	21.2478	19.142
CELE_C24H10.1	clc-7	-1.34323	4.51175e-08	202.913	333.745	180.991	319.248	85.1519	90.9157	135.986	96.7733
CELE_F48B9.5	npax-2	-2.55213	4.51183e-08	52.9339	116.765	33.444	111.003	9.82522	8.65864	13.8111	21.2689
CELE_F34D6.4	set-11	-2.63475	4.5466e-08	27.4472	51.4868	18.6893	48.6211	3.27507	4.32932	8.49912	7.4441
CELE_C13C12.2	dyf-4	-1.86891	4.56099e-08	130.374	270.305	117.054	244.94	32.7507	36.7992	77.5544	61.6797
CELE_D1009.3	ensh-1	-1.75617	4.56692e-08	114.69	263.87	122.956	262.371	42.576	44.3755	67.9929	71.2507
CELE_ZC410.4	twk-8	-1.49602	4.58188e-08	254.867	458.784	263.617	470.616	91.7021	98.4921	140.235	182.912
CELE_F20B10.1	nlr-1	-1.58413	4.60177e-08	685.2	1424.16	652.157	1312.77	244.539	260.842	413.27	440.265
CELE_Y57G11C.42	Y57G11C.42	-1.76638	4.64036e-08	160.762	377.876	168.203	380.713	76.4184	57.3635	97.7398	88.2657
CELE_ZK337.2	klu-1	-1.5306	4.65698e-08	146.058	290.532	144.596	301.818	62.2264	67.1045	83.9288	92.5195
CELE_C08F11.10	C08F11.10	1.21439	4.72587e-08	28.4275	23.9046	30.493	31.1909	66.5932	61.6928	67.9929	68.0603
CELE_F41E7.9	F41E7.9	-2.54659	4.77068e-08	33.3288	54.245	30.493	63.2992	2.18338	6.49398	15.9358	6.38066
CELE_Y40C5A.3	daf-42	-2.43118	4.77793e-08	23.5262	62.5196	30.493	56.8776	9.82522	4.32932	11.6863	6.38066
CELE_F32D8.7	F32D8.7	-1.91038	4.8692e-08	211.736	488.205	228.206	549.511	69.8683	64.9398	135.986	122.296
CELE_Y51H7C.12	Y51H7C.12	-1.92279	4.87055e-08	47.0524	78.1495	40.3295	86.2337	8.73353	16.235	16.9982	24.4592
CELE_Y39B6A.20	asp-1	0.729839	4.87055e-08	112654	143974	109449	141188	224328	222083	192928	201937
CELE_F55A4.10	cutl-21	-1.69591	4.87055e-08	87.2429	182.042	76.7244	140.359	28.384	36.7992	31.8717	53.1721
CELE_W02A2.3	pqn-74	-1.5819	4.97568e-08	1194.93	2575.26	1158.74	2778.74	551.304	517.354	753.234	752.917
CELE_Y5F2A.2	ttr-17	-1.33674	5.01503e-08	1155.72	2147.73	1189.23	2059.52	524.012	516.272	829.726	724.204
CELE_F11E6.9	F11E6.9	-1.69022	5.01503e-08	60.776	104.812	55.0842	114.673	19.6504	20.5643	32.9341	30.8398
CELE_Y37E3.8	Y37E3.8	0.248707	5.05541e-08	34845.2	33020.5	35068	31923.9	40299.8	39613.3	40561	39752.5
CELE_Y39G10AR.16	Y39G10AR.16	1.18091	5.07669e-08	61.7562	32.1792	48.1987	44.0342	94.9772	88.7511	129.612	107.408
CELE_Y62F5A.9	Y62F5A.9	-2.00916	5.08255e-08	78.4206	157.219	67.8716	170.633	18.5588	20.5643	38.246	40.4108
CELE_C27H5.4	mfsd-13.2	0.546446	5.09149e-08	224.479	221.577	221.32	207.328	316.591	340.934	295.344	324.35
CELE_B0334.13	B0334.13	-2.36685	5.09149e-08	60.776	131.475	40.3295	137.607	8.73353	18.3996	23.3726	21.2689
CELE_K11H12.11	K11H12.11	-2.45646	5.13387e-08	70.5785	163.654	63.937	171.55	10.9169	11.9056	41.4332	21.2689
CELE_C49A1.4	eya-1	-1.14901	5.204e-08	598.937	888.147	543.956	906.371	279.473	259.759	418.581	366.888
CELE_C34H4.4	col-107	-1.75145	5.21129e-08	4670.93	11387.8	4567.07	11413.1	1840.59	1832.39	3024.62	2818.12
CELE_W10G6.3	mua-6	0.684856	5.26564e-08	1016.53	963.538	954.137	1018.29	1382.08	1365.9	1835.81	1769.57
CELE_Y57G7A.5	Y57G7A.5	1.45782	5.28349e-08	26.467	12.8717	27.5421	14.6781	53.4929	57.3635	55.2443	56.3625
CELE_T09D3.3	T09D3.3	-2.63758	5.28349e-08	40.1906	126.878	49.1823	110.086	5.45846	9.74097	13.8111	23.3957
CELE_C29A12.6	C29A12.6	-2.4705	5.2942e-08	99.006	279.5	105.25	287.14	24.0172	12.988	50.9947	51.0452
CELE_Y34D9A.6	glrx-10	0.411087	5.33951e-08	804.791	702.427	780.031	732.987	950.863	1066.1	983.773	1013.46
CELE_F52A8.3	F52A8.3	-2.15785	5.33951e-08	43.1313	85.5048	46.2314	92.6554	5.45846	14.0703	19.123	21.2689
CELE_F55F8.1	ptr-10	-1.98208	5.41723e-08	134.295	308.001	124.923	299.983	37.1175	34.6346	75.4297	72.3141
CELE_K07A12.6	hot-5	-2.18972	5.45108e-08	47.0524	97.4571	39.3458	79.8121	5.45846	11.9056	16.9982	23.3957
CELE_F35C8.3	jkk-1	-2.1754	5.52782e-08	49.9931	127.797	47.215	143.111	17.4671	18.3996	19.123	26.5861
CELE_Y11D7A.9	Y11D7A.9	-1.77091	5.53055e-08	286.235	652.779	305.914	615.562	90.6104	98.4921	197.604	158.453
CELE_F11C1.6	nhr-25	-1.2752	5.53055e-08	548.944	867	500.676	990.77	236.897	259.759	335.715	369.015
CELE_F46C8.3	F46C8.3	-1.14455	5.53469e-08	351.912	581.065	331.489	590.793	184.496	190.49	228.414	236.084
CELE_ZC477.1	ssq-3	0.926258	5.57061e-08	246.045	199.511	249.846	145.863	366.808	363.663	427.081	439.202
CELE_K01A2.8	mps-2	-1.40631	5.59803e-08	378.379	651.859	360.998	656.844	141.92	146.115	242.225	242.465
CELE_F42A6.9	elks-1	-0.728152	5.64929e-08	1466.47	2004.31	1419.4	1987.96	1014.18	940.545	1082.57	1115.55
CELE_K08E7.5	K08E7.5	-1.86437	5.66425e-08	273.492	625.196	279.356	556.85	81.8769	71.4338	152.984	170.151
CELE_M28.1	cutl-9	-1.72164	5.66636e-08	222.518	474.414	204.598	441.26	75.3267	70.3515	123.237	138.248
CELE_D1054.9	D1054.9	-2.10973	5.67414e-08	301.919	737.364	315.75	736.656	66.5932	73.5985	184.856	159.516
CELE_F38G1.1	che-2	-2.31035	5.68414e-08	60.776	183.881	60.9861	140.359	13.1003	15.1526	33.9965	27.6495
CELE_W09G10.6	clec-125	2.09857	5.72451e-08	13.7236	9.19406	12.7874	8.25642	68.7766	54.1165	27.6221	37.2205
CELE_F35A5.3	abu-10	-1.75607	5.82214e-08	293.097	627.035	286.241	720.143	106.986	117.974	166.795	178.658
CELE_C33B4.3	shn-1	-1.59616	5.99237e-08	1389.02	2922.79	1294.48	2816.36	526.195	527.095	811.666	920.941
CELE_C34D4.3	C34D4.3	0.870036	6.07701e-08	103.907	68.0361	86.5609	68.8035	152.837	152.609	143.423	147.819
CELE_F58G1.7	F58G1.7	-1.52605	6.13161e-08	139.197	272.144	127.874	266.958	56.768	63.8575	67.9929	91.4561
CELE_F22D3.2	flcn-1	-0.588468	6.31305e-08	2866.27	3769.57	2972.58	3802.54	2221.59	2245.84	2129.03	2323.62
CELE_Y75B8A.20	grl-15	-1.91471	6.31305e-08	413.669	871.597	399.36	898.115	109.169	101.739	249.662	224.386
CELE_M01A12.1	col-53	-1.67124	6.34257e-08	56.8549	106.651	49.1823	94.4901	19.6504	21.6466	27.6221	27.6495
CELE_W02D3.3	mec-6	-1.35343	6.34257e-08	92.1442	153.541	79.6753	151.368	42.576	41.1286	53.1195	49.9818
CELE_T26C5.2	T26C5.2	-1.98402	6.45277e-08	414.649	928.601	405.262	871.511	96.0688	98.4921	244.35	223.323
CELE_C38C3.3	C38C3.3	0.920737	6.45277e-08	49.9931	52.4062	50.166	57.7949	93.8855	95.2451	95.6151	113.788
CELE_F18A11.2	F18A11.2	-1.90957	6.47195e-08	144.098	276.741	136.727	290.809	30.5674	37.8816	83.9288	73.3775
CELE_R11G1.1	R11G1.1	-2.00222	6.47195e-08	60.776	150.783	58.0351	151.368	24.0172	20.5643	28.6845	31.9033
CELE_F36H12.7	msp-19	0.939753	6.48252e-08	752.838	519.465	642.321	410.986	1093.87	1000.07	1158	1207.01
CELE_F54D10.2	fbxa-24	-1.77529	6.56476e-08	323.485	859.645	321.652	900.867	179.037	173.173	167.858	182.912
CELE_E02H9.7	E02H9.7	0.859167	6.62951e-08	175.466	135.153	188.86	121.094	302.399	295.476	251.786	274.368
CELE_Y73F8A.26	Y73F8A.26	-0.884318	6.64634e-08	398.965	505.674	386.573	477.038	203.055	189.408	273.034	292.447
CELE_C26B9.3	C26B9.3	-1.56438	6.67221e-08	432.294	804.481	409.197	812.799	143.012	154.773	263.473	270.114
CELE_R08B4.2	alr-1	-1.37948	6.67221e-08	260.748	540.611	254.764	482.542	141.92	124.468	169.982	155.263
CELE_F42F12.9	nspc-10	0.566021	6.77888e-08	449.938	535.095	480.019	544.924	703.049	728.408	803.166	742.283
CELE_R05D8.11	R05D8.11	-2.29761	6.88691e-08	45.0918	91.9406	26.5584	73.3904	7.64184	10.8233	16.9982	12.7613
CELE_Y43F8A.2	Y43F8A.2	0.979629	6.88691e-08	116.651	91.9406	114.103	77.0599	173.579	167.761	207.166	238.211
CELE_T19H5.6	T19H5.6	-1.57488	6.90759e-08	36.2695	59.7614	42.2968	59.6297	15.2837	17.3173	14.8735	19.142
CELE_C30D11.1	unc-103	-1.42968	6.9119e-08	379.36	785.173	359.031	764.178	203.055	188.325	248.599	209.498
CELE_Y7A9D.1	Y7A9D.1	-1.29397	6.927e-08	465.622	694.152	400.344	825.642	217.247	186.161	279.408	290.32
CELE_Y67D2.3	cisd-3.2	0.462155	7.03719e-08	2156.57	1710.1	2139.43	1910.9	2680.1	2792.41	2715.47	2716.03
CELE_Y50D7A.6	klp-20	-0.801157	7.09093e-08	557.767	823.788	604.942	835.733	409.384	370.157	426.018	414.743
CELE_C15A7.2	tmem-145	-2.53186	7.18373e-08	31.3682	65.2779	19.6729	69.7209	8.73353	7.57631	7.43673	8.50754
CELE_C12C8.2	cbl-1	0.701995	7.27794e-08	655.792	428.443	583.302	506.394	840.602	908.075	869.035	916.687
CELE_T26H5.8	T26H5.8	-3.13811	7.28514e-08	18.6249	64.3585	20.6566	66.0514	1.09169	6.49398	6.37434	5.31721
CELE_T05D4.3	exc-12	-1.7711	7.29941e-08	102.927	225.255	107.217	248.61	32.7507	46.5402	58.4314	62.7431
CELE_T03G11.3	zchc-1A	-1.93446	7.41739e-08	70.5785	154.46	65.9043	147.698	32.7507	14.0703	38.246	29.7764
CELE_C54E10.6	C54E10.6	-1.4755	7.48272e-08	96.0652	136.072	89.5118	155.037	30.5674	30.3052	58.4314	52.1087
CELE_T09F5.11	fbxa-84	1.25513	7.49711e-08	23.5262	22.9852	27.5421	22.0171	58.9513	56.2812	58.4314	55.299
CELE_K02B12.1	ceh-6	-1.56106	7.60289e-08	115.67	247.32	121.972	233.015	50.2178	45.4579	72.2425	75.5044
CELE_F16D3.1	tba-5	-1.94506	7.61021e-08	115.67	287.774	119.021	215.584	32.7507	29.2229	61.6186	68.0603
CELE_R05F9.13	msp-31	0.853764	7.63129e-08	717.548	443.154	650.19	465.112	968.33	982.756	1099.57	1060.25
CELE_M04D5.3	M04D5.3	0.524115	7.71664e-08	227.42	229.852	208.533	224.758	323.141	312.793	312.343	332.858
CELE_C15A11.7	C15A11.7	-0.792592	7.74755e-08	411.708	518.545	447.559	500.889	219.43	228.372	307.031	329.667
CELE_T08E11.4	math-41	-1.65212	7.76022e-08	289.176	648.182	270.503	680.696	140.828	115.809	167.858	176.531
CELE_K12H4.1	pros-1	-1.71092	7.76022e-08	446.997	955.263	399.36	906.371	155.02	142.868	263.473	265.861
CELE_Y47D7A.6	Y47D7A.6	2.21211	7.80012e-08	7.84206	4.59703	9.83646	7.33904	38.2092	36.7992	21.2478	40.4108
CELE_Y38A10A.2	Y38A10A.2	-1.97785	7.89003e-08	112.73	315.356	120.988	290.809	31.6591	49.7872	65.8682	65.9334
CELE_K08F8.2	atf-2	-1.95184	7.94548e-08	912.62	2030.05	910.856	2032.91	228.164	224.042	525.883	543.419
CELE_F32H2.7	F32H2.7	0.761171	7.9513e-08	130.374	114.926	142.629	111.003	191.046	212.137	226.289	214.815
CELE_D1069.2	cpn-2	-1.59554	8.01595e-08	382.3	843.096	391.491	733.904	134.278	149.362	248.599	245.655
CELE_Y59A8B.20	lon-8	-1.61312	8.04852e-08	790.088	1647.58	787.901	1609.08	281.656	290.065	507.822	500.881
CELE_Y65B4BM.3	Y65B4BM.3	-1.85667	8.06548e-08	761.66	1790.08	786.917	1772.38	240.172	220.795	484.45	465.788
CELE_C48A7.1	egl-19	-1.41488	8.08118e-08	948.889	1863.64	874.461	1854.94	457.419	426.438	553.505	641.256
CELE_Y38H6C.16	Y38H6C.16	-1.41289	8.09222e-08	154.881	276.741	131.809	276.131	65.5015	70.3515	95.6151	84.012
CELE_C03H5.1	clec-10	0.992613	8.13268e-08	229.38	143.427	236.075	144.029	397.376	334.44	359.088	405.172
CELE_D1022.8	cah-2	-1.96109	8.13268e-08	62.7365	142.508	66.8879	153.202	18.5588	19.4819	33.9965	37.2205
CELE_T14G11.3	immt-1	0.233103	8.23587e-08	1942.87	1986.84	1969.26	2017.32	2358.05	2347.57	2253.33	2347.02
CELE_E02H9.13	E02H9.13	-2.33838	8.2536e-08	23.5262	55.1644	30.493	58.7123	5.45846	7.57631	11.6863	8.50754
CELE_T22C1.8	T22C1.8	0.981004	8.25548e-08	54.8944	46.8897	50.166	44.9516	106.986	95.2451	100.927	85.0754
CELE_T02H6.11	T02H6.11	0.389638	8.2969e-08	5810.97	4780.91	5681.54	5333.65	7070.89	7027.57	7208.31	6997.45
CELE_F43D9.1	ptr-25	-2.05075	8.32255e-08	1422.35	3483.63	1449.89	3355.78	348.25	329.028	828.664	837.993
CELE_W08E12.2	W08E12.2	-2.1575	8.36486e-08	35.2893	44.1315	27.5421	65.134	6.55015	9.74097	11.6863	10.6344
CELE_AH9.6	AH9.6	-1.90732	8.44572e-08	71.5588	168.251	85.5772	177.054	25.1089	24.8936	35.0589	48.9184
CELE_K04B12.2	K04B12.2	-0.872216	8.45919e-08	753.818	1133.63	783.966	1156.82	481.436	478.39	542.881	589.147
CELE_Y119D3B.21	Y119D3B.21	1.1151	8.5254e-08	2431.04	1483.92	2232.88	1512.76	4610.21	4239.49	3774.67	3967.7
CELE_T13F2.10	msp-79	1.05069	8.55999e-08	175.466	121.362	164.269	101.829	280.565	267.336	321.904	294.574
CELE_K10B4.6	cwn-1	-1.40874	8.61004e-08	385.241	816.433	418.05	720.143	165.937	182.914	259.223	273.305
CELE_ZK897.1	unc-31	-1.43496	8.6168e-08	209.775	429.363	212.468	416.491	108.077	103.904	111.551	145.692
CELE_B0222.4	spl-2	1.00856	8.62078e-08	96.0652	109.409	66.8879	84.399	198.688	187.243	161.483	171.214
CELE_C34F6.2	col-178	1.35733	8.64827e-08	18845.5	8842.85	18211.2	8666.49	33987.6	33356.3	36707.7	35749.7
CELE_M02F4.8	aqp-7	0.975492	8.77282e-08	1998.75	1372.67	2139.43	1334.79	2861.32	3020.78	3843.73	3732.68
CELE_F25D7.3	blmp-1	-1.59165	8.85851e-08	789.107	1499.55	780.031	1652.2	284.931	272.747	526.945	481.739
CELE_C34D1.3	odr-3	-1.723	8.86613e-08	73.5193	187.559	91.4791	156.872	27.2923	33.5522	49.9323	43.6011
CELE_F42G8.12	isp-1	0.215476	8.96206e-08	8916.42	8690.23	8473.13	8394.94	9823.04	9888.17	10224.4	10091
CELE_ZC247.2	ZC247.2	-1.54472	9.13744e-08	327.406	648.182	311.816	607.306	121.178	119.056	186.981	222.259
CELE_F49E12.2	dod-23	0.891698	9.16916e-08	2279.1	1515.18	2177.79	1483.4	3776.16	3892.06	3284.91	2877.68
CELE_C37A5.3	C37A5.3	1.19332	9.21198e-08	49.0129	76.3107	38.3622	56.8776	106.986	115.809	130.674	152.072
CELE_F25C8.3	unc-80	-1.43769	9.21757e-08	411.708	854.129	442.641	881.602	193.229	233.783	282.596	246.719
CELE_C34E11.3	tag-241	-1.499	9.21848e-08	646.97	1387.38	654.125	1367.81	306.765	278.159	453.64	396.664
CELE_Y52B11A.4	Y52B11A.4	-1.66705	9.35468e-08	292.117	594.856	272.47	651.34	91.7021	133.127	183.793	161.643
CELE_T08H4.1	rhgf-2	-1.66292	9.38032e-08	1155.72	2741.67	1253.17	2706.27	470.519	455.661	779.794	775.25
CELE_ZK896.3	ZK896.3	1.36842	9.43828e-08	15.6841	27.5822	27.5421	21.0997	66.5932	49.7872	57.369	63.8066
CELE_ZK938.2	arrd-4	-1.34694	9.47684e-08	306.821	623.358	341.325	575.197	151.745	140.703	224.164	209.498
CELE_R13H4.1	nphp-4	-1.78191	9.63443e-08	96.0652	210.544	90.4954	188.98	40.3926	23.8113	53.1195	53.1721
CELE_C27H5.7	dyf-13	-2.09162	9.63516e-08	41.1708	75.3913	35.4113	80.7294	8.73353	8.65864	21.2478	15.9516
CELE_ZC334.7	ZC334.7	-2.26689	9.65535e-08	18.6249	51.4868	34.4276	44.9516	5.45846	6.49398	10.6239	8.50754
CELE_C02B10.3	C02B10.3	-1.33288	9.74987e-08	809.693	1598.85	920.693	1699.91	433.401	396.133	592.813	574.259
CELE_Y73B6BL.19	shl-1	-1.7333	9.75484e-08	103.907	247.32	111.152	257.784	40.3926	51.9519	61.6186	62.7431
CELE_Y55F3BR.4	lgc-33	-1.48115	9.89462e-08	58.8154	114.926	73.7735	126.598	29.4757	30.3052	33.9965	40.4108
CELE_C14F11.1	got-2.2	0.467938	9.92661e-08	5418.86	4296.39	4851.34	4320.86	6204.08	6406.31	6707.93	6802.84
CELE_F39D8.1	pqn-36	-1.70801	9.94857e-08	273.492	664.731	256.732	633.91	112.444	115.809	168.92	162.707
CELE_F53F8.1	klf-2	-1.76009	1.02151e-07	42.1511	73.5525	51.1496	87.1511	16.3754	10.8233	29.7469	18.0785
CELE_T07A5.3	vglu-3	1.16373	1.03501e-07	86.2627	57.0032	90.4954	55.0428	158.295	136.374	190.168	160.58
CELE_Y11D7A.5	Y11D7A.5	-1.89096	1.05193e-07	97.0455	189.398	94.43	178.889	25.1089	19.4819	59.4938	46.7915
CELE_Y37E3.5	arl-13	-1.91025	1.05561e-07	53.9142	127.797	55.0842	97.2423	12.0086	18.3996	27.6221	30.8398
CELE_F53B3.5	F53B3.5	-1.32739	1.05972e-07	2234.01	4084	2228.94	3972.26	987.981	950.286	1519.22	1531.36
CELE_C34F11.5	C34F11.5	1.32216	1.06339e-07	61.7562	45.0509	83.6099	49.5385	132.095	109.315	168.92	188.229
CELE_C29E6.5	nhr-43	-1.40547	1.06551e-07	209.775	393.506	212.468	382.547	90.6104	83.3394	141.298	137.184
CELE_D1081.2	unc-120	-1.37641	1.07232e-07	654.812	1185.11	646.256	1230.21	302.399	257.595	463.202	408.362
CELE_K11H3.7	twk-48	-1.77659	1.07754e-07	58.8154	113.087	63.937	98.1597	17.4671	16.235	28.6845	35.0936
CELE_Y51A2D.15	grdn-1	-1.40437	1.07965e-07	1163.57	2342.65	1175.46	2212.72	514.187	519.519	789.355	781.63
CELE_R10E9.2	R10E9.2	0.94268	1.08121e-07	233.301	175.607	276.405	156.872	396.284	367.992	447.266	405.172
CELE_B0250.2	calf-1	-1.77469	1.08907e-07	61.7562	86.4242	45.2477	125.681	20.7421	19.4819	26.5597	26.5861
CELE_C09F5.1	C09F5.1	-1.47141	1.09119e-07	735.193	1506.91	720.029	1510.01	330.782	309.546	489.762	482.803
CELE_F40E10.5	F40E10.5	-1.93902	1.09363e-07	312.702	605.889	279.356	648.588	76.4184	64.9398	156.171	183.976
CELE_ZK520.3	dyf-2	-1.60485	1.09946e-07	126.453	272.144	116.07	238.519	42.576	59.5282	77.5544	68.0603
CELE_C26B9.6	C26B9.6	-1.44498	1.11537e-07	229.38	455.106	228.206	433.003	101.527	95.2451	163.608	133.994
CELE_C14C10.1	C14C10.1	1.05614	1.11991e-07	105.868	68.0361	115.087	68.8035	180.129	159.103	207.166	195.673
CELE_T20H4.5	ndus-8	0.302494	1.12552e-07	2939.79	2721.44	2913.56	2647.56	3445.38	3647.45	3393.27	3351.97
CELE_C16A3.10	oatr-1	0.49024	1.13104e-07	4151.39	3388.93	4110.66	3265.87	5421.34	5288.27	5094.16	5147.06
CELE_C30G12.4	C30G12.4	-1.93229	1.14082e-07	57.8352	104.812	56.0678	112.838	20.7421	16.235	18.0606	31.9033
CELE_F14F3.1	vab-3	-1.43347	1.14482e-07	527.379	1122.6	523.3	987.101	251.089	221.878	371.836	325.413
CELE_K01A2.7	col-69	-2.11732	1.15527e-07	39.2103	73.5525	27.5421	68.8035	6.55015	12.988	16.9982	11.6979
CELE_F11C3.2	unc-122	-1.09689	1.15532e-07	106.848	161.816	104.266	152.285	55.6763	50.8695	72.2425	66.9969
CELE_Y73B6BL.25	acp-7	0.809848	1.1664e-07	110.769	83.666	110.168	77.0599	161.57	167.761	175.294	162.707
CELE_C26G2.1	syg-2	-1.53835	1.17158e-07	715.588	1548.28	721.013	1467.81	296.94	290.065	440.892	505.135
CELE_ZK265.7	ZK265.7	-1.87294	1.17936e-07	141.157	421.088	191.811	420.16	72.0516	51.9519	97.7398	98.9002
CELE_F42F12.6	nspc-13	0.492039	1.18777e-07	278.393	312.598	305.914	346.77	427.943	427.52	452.578	442.392
CELE_B0348.5	idpp-2	-1.777	1.18829e-07	55.8747	106.651	42.2968	85.3163	16.3754	19.4819	28.6845	20.2054
CELE_C05A9.2	C05A9.2	-1.28704	1.19143e-07	507.773	899.18	557.727	968.753	242.355	237.03	326.154	396.664
CELE_R12C12.10	R12C12.10	-1.48149	1.19958e-07	57.8352	112.168	69.8389	113.755	38.2092	25.9759	29.7469	32.9667
CELE_F54C8.1	F54C8.1	0.962314	1.20109e-07	50.9734	47.8091	59.0188	42.1995	89.5187	85.5041	104.114	109.535
CELE_R05G6.6	glt-6	-0.965148	1.2048e-07	91.1639	116.765	97.381	130.268	52.4012	54.1165	61.6186	55.299
CELE_C07D10.4	nas-7	-1.49749	1.20758e-07	212.716	376.037	210.5	438.508	78.6018	90.9157	127.487	141.438
CELE_W02B3.2	grk-2	-1.1542	1.21285e-07	411.708	756.672	442.641	780.69	234.714	268.418	295.344	276.495
CELE_W05F2.8	W05F2.8	-2.86718	1.21456e-07	17.6446	38.6151	18.6893	42.1995	3.27507	2.16466	4.24956	6.38066
CELE_T07H8.4	mec-1	-1.47192	1.22156e-07	149.979	248.24	132.792	268.792	52.4012	60.6105	75.4297	99.9636
CELE_F07C4.11	F07C4.11	-3.52432	1.22721e-07	17.6446	33.0986	14.7547	33.0257	1.09169	1.08233	3.18717	3.19033
CELE_F33D11.3	col-54	-2.27527	1.23342e-07	83.3219	200.431	75.7408	189.898	22.9255	10.8233	41.4332	38.2839
CELE_F54D5.15	F54D5.15	-1.64213	1.23785e-07	206.834	433.04	212.468	458.69	75.3267	80.0924	145.547	119.106
CELE_C06E8.5	C06E8.5	-1.54232	1.24486e-07	138.216	313.518	140.661	314.661	78.6018	75.7631	78.6168	78.6947
CELE_M03E7.2	M03E7.2	-1.88124	1.25321e-07	44.1116	92.8601	44.2641	99.077	14.192	19.4819	21.2478	21.2689
CELE_H02I12.4	dsl-6	-2.01471	1.26132e-07	204.874	536.014	230.173	486.211	54.5846	51.9519	125.362	128.677
CELE_T05H4.7	cht-6	-1.65336	1.26198e-07	34.309	66.1973	41.3131	60.5471	15.2837	20.5643	13.8111	14.8882
CELE_Y71H2B.8	Y71H2B.8	-1.06591	1.2925e-07	227.42	370.521	231.157	366.035	129.911	128.797	159.358	153.136
CELE_T21E8.3	pgp-8	1.8503	1.29466e-07	14.7039	10.1135	11.8038	7.33904	28.384	36.7992	44.6204	47.8549
CELE_F14B6.2	F14B6.2	-1.46426	1.31441e-07	159.782	296.049	136.727	319.248	74.235	73.5985	87.1159	95.7098
CELE_K02E10.8	syg-1	-1.52794	1.3293e-07	405.827	845.854	406.246	808.212	145.195	178.584	267.722	263.734
CELE_C01G12.1	madf-5	-1.18731	1.33004e-07	392.103	658.295	355.096	685.283	239.08	187.243	251.786	240.338
CELE_R12E2.14	R12E2.14	-1.75995	1.33222e-07	695.983	1585.98	611.828	1592.57	233.622	267.336	451.516	372.205
CELE_F20G2.2	F20G2.2	0.588685	1.33714e-07	590.115	550.724	534.12	536.667	888.637	831.23	812.728	793.328
CELE_B0280.12	glr-2	-1.73191	1.34437e-07	41.1708	75.3913	47.215	88.9859	19.6504	12.988	26.5597	17.0151
CELE_T05H4.12	atp-4	0.334709	1.34499e-07	6400.1	5595.51	6294.35	5704.27	7594.9	7382.57	7751.19	7528.11
CELE_C43C3.1	ifp-1	-1.54858	1.3595e-07	796.949	1894.9	860.69	1987.96	395.192	428.603	534.382	535.975
CELE_F40F9.10	F40F9.10	-2.25394	1.36073e-07	68.618	148.944	68.8552	152.285	12.0086	9.74097	33.9965	36.157
CELE_F56A3.5	bro-1	-2.22234	1.36545e-07	67.6378	177.445	72.7898	181.641	19.6504	11.9056	40.3708	35.0936
CELE_R05G9.2	twk-49	-1.42631	1.36545e-07	177.427	332.825	211.484	393.556	87.3353	81.1748	139.173	107.408
CELE_T16H12.6	kel-10	0.908702	1.36545e-07	104.888	80.9078	97.381	74.3078	143.012	146.115	196.542	183.976
CELE_E02A10.3	E02A10.3	-1.23312	1.36545e-07	101.947	148.944	98.3646	152.285	48.0344	37.8816	57.369	70.1872
CELE_F49E10.1	tbc-16	-1.74574	1.36545e-07	92.1442	224.335	102.299	217.419	37.1175	36.7992	59.4938	56.3625
CELE_C53H9.1	rpl-27	0.310984	1.36751e-07	24453.5	22681.8	24118	22421.7	29708.2	29484.8	29266.7	27747.3
CELE_F47C12.2	clec-78	-1.91737	1.37412e-07	1459.6	3431.22	1469.57	3345.68	398.467	386.392	875.409	909.243
CELE_C54G4.8	cyc-1	0.313813	1.39061e-07	9484.97	8361.08	9467.59	8513.29	10843.8	11116.6	11484.4	11084.3
CELE_K01H12.4	K01H12.4	0.991194	1.39381e-07	57.8352	43.2121	57.0515	36.6952	94.9772	97.4097	101.989	91.4561
CELE_ZC64.4	lim-4	-1.9631	1.39381e-07	101.947	186.64	77.708	205.493	24.0172	20.5643	49.9323	52.1087
CELE_Y39G8B.7	Y39G8B.7	2.56705	1.39777e-07	1.96051	5.51644	3.93458	5.50428	26.2006	22.7289	27.6221	24.4592
CELE_T03F6.4	T03F6.4	-1.69699	1.40659e-07	105.868	225.255	90.4954	239.436	48.0344	46.5402	50.9947	58.4893
CELE_Y69E1A.5	Y69E1A.5	-0.990945	1.40891e-07	618.542	852.29	567.564	903.619	306.765	308.464	438.767	426.44
CELE_C36B1.10	gskl-2	0.947161	1.41316e-07	74.4996	54.245	66.8879	52.2907	110.261	100.657	133.861	131.867
CELE_C40H1.4	elo-4	-1.55185	1.41316e-07	127.433	250.998	126.89	261.453	43.6677	61.6928	76.492	79.7582
CELE_W06H8.1	rme-1	0.474054	1.42068e-07	5955.06	4969.39	6057.29	4803.4	7752.1	7878.28	7243.37	7383.48
CELE_H06I04.4	ubl-1	0.306738	1.42634e-07	23332.1	21065.4	23646.9	21183.2	27579.4	27971.7	27546.7	27265.6
CELE_F56A11.6	F56A11.6	0.987875	1.44168e-07	68.618	45.9703	75.7408	56.8776	123.361	114.727	142.36	108.471
CELE_C10G11.7	chdp-1	-0.29876	1.45201e-07	10070.2	10906	10005.6	11284.7	8511.92	8253.85	8950.63	8645.79
CELE_ZK1307.1	ZK1307.1	0.509485	1.45201e-07	584.233	600.372	594.122	587.123	767.459	774.948	922.154	902.863
CELE_F36A4.8	ttr-20	-0.96845	1.46129e-07	130.374	178.365	125.907	155.037	57.8596	70.3515	95.6151	77.6313
CELE_R07E5.15	R07E5.15	0.92024	1.47267e-07	72.5391	55.1644	79.6753	63.2992	109.169	115.809	154.046	131.867
CELE_W06B11.3	dct-11	0.411882	1.47571e-07	386.221	415.572	401.328	391.721	562.221	530.342	516.321	513.643
CELE_Y54G2A.49	Y54G2A.49	1.56639	1.48361e-07	21.5657	22.0658	17.7056	22.9345	82.9685	73.5985	46.7451	46.7915
CELE_C35C5.5	lev-8	-1.72035	1.48402e-07	74.4996	184.801	96.3973	159.624	27.2923	28.1406	53.1195	47.8549
CELE_T27B1.2	pat-9	-1.41998	1.48618e-07	723.43	1405.77	747.571	1437.53	324.232	292.229	506.76	489.184
CELE_C24F3.3	nas-12	-2.12486	1.48738e-07	34.309	79.9884	38.3622	71.5556	8.73353	9.74097	18.0606	14.8882
CELE_F08F1.6	spp-13	-1.71576	1.48842e-07	106.848	192.156	92.4627	210.08	30.5674	32.4699	62.681	57.4259
CELE_C34F11.4	msp-50	0.846194	1.50254e-07	432.294	285.016	412.148	270.627	575.321	628.834	654.432	656.144
CELE_F44G4.8	dep-1	-1.45873	1.52925e-07	999.863	2005.23	991.515	2002.64	415.934	422.109	631.059	713.57
CELE_W09G12.10	W09G12.10	-1.80239	1.53191e-07	56.8549	110.329	60.0024	112.838	20.7421	12.988	26.5597	37.2205
CELE_F15B9.9	dsl-7	-2.34679	1.53482e-07	39.2103	96.5377	31.4767	94.4901	13.1003	7.57631	18.0606	12.7613
CELE_R04F11.2	R04F11.2	0.399856	1.54654e-07	6160.92	5145.92	5941.22	5141.92	7206.26	7449.68	7398.48	7483.45
CELE_ZK1025.3	ZK1025.3	2.04107	1.55635e-07	51.9536	34.018	41.3131	34.8604	143.012	95.2451	198.667	229.704
CELE_F21D9.4	F21D9.4	-1.96328	1.61952e-07	46.0721	79.9884	31.4767	80.7294	15.2837	11.9056	19.123	14.8882
CELE_ZK1010.8	ZK1010.8	-1.61279	1.62506e-07	164.683	380.634	165.253	312.827	80.7852	54.1165	110.489	89.3292
CELE_W03D8.11	W03D8.11	-1.99201	1.64261e-07	44.1116	71.7137	33.444	80.7294	9.82522	9.74097	20.1854	18.0785
CELE_R144.1	klp-6	-2.24383	1.65355e-07	32.3485	42.2927	19.6729	47.7038	6.55015	3.24699	10.6239	9.57098
CELE_K10B3.8	gpd-2	0.634604	1.6578e-07	5507.09	4597.03	5881.22	5036.42	7109.09	7273.26	9191.79	9060.53
CELE_B0563.2	tsp-11	-1.75088	1.67323e-07	172.525	352.133	179.024	341.265	51.3095	46.5402	101.989	110.598
CELE_Y113G7A.5	lgc-55	-1.85692	1.68834e-07	112.73	272.144	119.021	233.015	29.4757	37.8816	59.4938	76.5679
CELE_C38C6.2	atgp-2	-0.959738	1.69422e-07	849.883	1396.58	905.938	1373.32	513.095	520.601	669.305	624.241
CELE_F10E7.7	rpl-33	0.206194	1.69683e-07	18440.6	17373.1	18430.6	17477	21041.3	20346.7	20696.4	20653.1
CELE_Y54F10BM.9	Y54F10BM.9	-0.607834	1.70523e-07	364.656	432.121	347.227	461.442	271.831	251.101	262.41	269.051
CELE_T05H4.13	alh-4	0.251413	1.70862e-07	2996.65	3189.42	3036.52	3230.1	3612.41	3688.58	3788.48	3735.87
CELE_F58B4.5	F58B4.5	0.83779	1.71963e-07	511.694	328.228	538.054	362.365	791.476	816.077	718.175	782.694
CELE_R07G3.8	R07G3.8	-1.37605	1.74331e-07	220.558	413.733	209.517	394.473	85.1519	108.233	142.36	141.438
CELE_F25G6.7	slc-17.8	-1.79093	1.75411e-07	64.697	114.926	58.0351	125.681	18.5588	21.6466	36.1212	28.7129
CELE_Y48B6A.12	men-1	0.340806	1.75942e-07	4693.47	4172.27	4674.29	4295.17	5945.35	5783.97	5478.74	5377.83
CELE_K06A5.8	nmtn-1	-1.51153	1.76873e-07	156.841	295.129	147.547	301.818	53.4929	68.1868	92.4279	102.09
CELE_Y53C12B.6	cutl-2	-1.43685	1.77214e-07	269.571	509.351	272.47	463.277	112.444	95.2451	169.982	181.849
CELE_Y54G11A.4	Y54G11A.4	1.03561	1.7792e-07	49.9931	70.7943	54.1005	76.1425	126.636	127.715	133.861	127.613
CELE_ZK909.4	ces-2	-1.26028	1.78608e-07	527.379	901.938	555.76	932.058	239.08	227.289	368.649	382.839
CELE_Y105E8A.26	zoo-1	-1.2255	1.79494e-07	1406.67	2610.19	1368.25	2625.54	753.267	741.396	949.776	981.557
CELE_D1014.5	D1014.5	-2.18879	1.79494e-07	199.973	396.264	184.925	398.143	28.384	32.4699	90.3031	107.408
CELE_F54A5.2	cutl-20	-1.5699	1.80172e-07	198.992	425.685	206.566	412.821	82.9685	73.5985	139.173	123.359
CELE_F56C9.8	F56C9.8	-1.49438	1.80433e-07	578.352	1185.11	634.452	1289.84	267.464	229.454	412.207	399.854
CELE_R105.1	R105.1	0.987772	1.8107e-07	88.2232	71.7137	94.43	58.7123	133.186	140.703	190.168	155.263
CELE_Y53G8AL.1	Y53G8AL.1	-1.78684	1.82744e-07	46.0721	96.5377	51.1496	94.4901	12.0086	19.4819	25.4973	26.5861
CELE_F07A11.1	F07A11.1	-2.09227	1.83151e-07	37.2498	61.6002	31.4767	47.7038	2.18338	9.74097	14.8735	14.8882
CELE_Y11D7A.11	col-120	1.07064	1.83248e-07	297.018	234.449	277.388	237.601	527.287	470.814	579.002	619.987
CELE_F52H2.2	aat-3	-1.02532	1.83248e-07	947.909	1555.64	992.499	1480.65	519.645	509.778	672.493	743.346
CELE_K02F3.4	zip-2	0.555831	1.83965e-07	3548.53	4392.92	3648.34	4590.57	5796.88	5667.08	6157.61	6165.84
CELE_M04G12.3	gcy-34	-2.32166	1.84023e-07	25.4867	48.7285	22.6239	47.7038	4.36677	7.57631	5.31195	11.6979
CELE_F33D4.6	F33D4.6	-1.75592	1.85058e-07	801.851	1883.86	847.903	1954.02	281.656	275.994	541.819	525.341
CELE_T22B11.5	ogdh-1	0.235928	1.85158e-07	9214.42	9457.93	9158.73	9612.31	11128.7	11298.4	10837.4	10833.3
CELE_C40H5.5	ttx-3	-1.99496	1.85158e-07	37.2498	56.0838	39.3458	80.7294	8.73353	8.65864	21.2478	14.8882
CELE_F33A8.7	F33A8.7	-1.68003	1.86171e-07	149.979	286.855	159.351	306.405	44.7593	53.0342	107.301	76.5679
CELE_F14B8.3	pes-23	0.942676	1.86528e-07	127.433	94.6989	124.923	79.8121	211.788	189.408	241.162	176.531
CELE_H34I24.2	H34I24.2	0.677728	1.87488e-07	2421.24	2808.79	2208.29	3095.24	4658.25	4386.68	4233.62	3573.17
CELE_R01E6.7	R01E6.7	-1.5989	1.87488e-07	50.9734	86.4242	54.1005	107.333	24.0172	22.7289	25.4973	26.5861
CELE_F53C3.4	F53C3.4	-1.74198	1.90673e-07	64.697	159.057	92.4627	145.863	21.8338	24.8936	46.7451	44.6646
CELE_F41G3.21	F41G3.21	-1.37486	1.92194e-07	145.078	285.935	140.661	294.479	86.2436	81.1748	77.5544	89.3292
CELE_B0250.9	dhcr-7	-1.86124	1.92399e-07	63.7167	151.702	76.7244	135.772	19.6504	18.3996	40.3708	39.3474
CELE_F46G11.1	twnk-1	-1.71656	1.93082e-07	60.776	134.233	60.9861	121.094	24.0172	28.1406	32.9341	29.7764
CELE_F09E8.7	lev-1	-1.54759	1.96573e-07	175.466	319.034	147.547	294.479	51.3095	69.2691	108.364	91.4561
CELE_F07H5.13	F07H5.13	-1.14151	1.9715e-07	611.681	946.989	628.55	908.206	236.897	307.382	427.081	431.758
CELE_C24D10.8	nspd-6	0.929567	1.9715e-07	141.157	92.8601	114.103	80.7294	188.863	185.078	229.476	211.625
CELE_Y49F6C.4	bath-10	-1.08613	1.98858e-07	241.143	355.81	249.846	288.975	108.077	93.0804	165.733	168.024
CELE_ZK836.2	ogdh-2	0.317731	1.99164e-07	2928.03	2874.06	3030.61	2894.33	3818.74	3802.23	3459.14	3535.95
CELE_C09H10.3	nuo-1	0.21582	2.00701e-07	8292.98	8056.76	8052.13	7662.88	9324.14	9397.87	9239.6	9275.35
CELE_R13D11.8	nhr-270	-1.90667	2.01149e-07	63.7167	128.717	48.1987	112.838	15.2837	20.5643	28.6845	29.7764
CELE_F32A6.5	sto-2	-2.01955	2.02549e-07	49.0129	138.83	54.1005	122.929	17.4671	16.235	28.6845	27.6495
CELE_Y39G8C.3	bkip-1	-1.93168	2.03449e-07	36.2695	65.2779	36.3949	78.8947	10.9169	19.4819	12.7487	13.8248
CELE_C44E4.6	acbp-1	0.756874	2.03477e-07	2578.08	1980.4	2503.38	2032	3706.29	4039.26	3810.79	3809.25
CELE_C56G2.6	let-767	0.519532	2.03477e-07	4945.4	3850.47	5010.69	3942.9	6384.21	6322.97	6287.22	6446.59
CELE_F30A10.1	calm-1	-0.925395	2.0359e-07	160.762	221.577	155.416	211.915	80.7852	94.1627	113.676	106.344
CELE_T15B7.4	col-142	1.02019	2.0359e-07	2234.99	1229.25	2085.33	1266.9	3207.39	3261.06	3654.62	3699.72
CELE_F58E6.10	unc-42	-1.95729	2.0359e-07	147.039	393.506	162.302	369.704	43.6677	44.3755	96.6774	91.4561
CELE_F01D4.6	mec-3	-1.67639	2.0486e-07	38.23	69.8749	45.2477	76.1425	16.3754	15.1526	23.3726	17.0151
CELE_ZK512.3	ced-11	-1.22313	2.06749e-07	384.261	684.038	377.72	665.101	201.963	175.338	286.845	240.338
CELE_Y42A5A.4	cdkl-1	-1.75216	2.06749e-07	41.1708	91.0212	45.2477	78.8947	18.5588	14.0703	16.9982	26.5861
CELE_F56A8.1	anoh-1	-2.1947	2.07886e-07	25.4867	52.4062	29.5094	49.5385	8.73353	4.32932	10.6239	10.6344
CELE_F47B10.8	F47B10.8	-2.61813	2.08243e-07	22.5459	84.5854	29.5094	54.1254	4.36677	8.65864	9.56151	8.50754
CELE_F58B4.6	F58B4.6	-1.53589	2.09095e-07	95.085	214.222	108.201	207.328	39.3009	51.9519	64.8058	59.5528
CELE_F31F6.5	daf-6	-1.77725	2.0948e-07	119.591	286.855	134.76	303.653	45.851	47.6225	83.9288	69.1238
CELE_F18C12.1	che-3	-1.73511	2.09609e-07	118.611	265.708	120.988	283.47	46.9427	48.7049	66.9305	74.441
CELE_BE10.1	BE10.1	1.32032	2.09796e-07	23.5262	19.3075	23.6075	15.5955	49.1261	44.3755	52.0571	58.4893
CELE_F36H9.5	F36H9.5	-1.55264	2.0994e-07	85.2824	154.46	93.4464	176.137	39.3009	25.9759	56.3066	52.1087
CELE_Y67A10A.7	Y67A10A.7	-1.5927	2.13624e-07	59.7957	113.087	71.8062	146.781	33.8424	25.9759	32.9341	37.2205
CELE_K02F3.6	ceeh-1	0.531191	2.14447e-07	250.946	251.917	301.979	271.544	379.909	372.322	396.271	406.235
CELE_C41G7.6	cylc-2	1.17428	2.15305e-07	72.5391	36.7763	37.3786	55.9602	123.361	108.233	106.239	119.106
CELE_T05F1.5	T05F1.5	1.00905	2.15425e-07	56.8549	44.1315	54.1005	37.6126	90.6104	85.5041	100.927	109.535
CELE_C13G3.2	hot-6	-1.55903	2.16037e-07	116.651	178.365	102.299	161.459	28.384	38.9639	44.6204	77.6313
CELE_T10B5.10	T10B5.10	-1.60117	2.17504e-07	91.1639	196.753	92.4627	195.402	41.4843	37.8816	53.1195	57.4259
CELE_F14D12.1	F14D12.1	-1.38129	2.18711e-07	214.676	418.33	206.566	411.904	91.7021	109.315	145.547	133.994
CELE_R11G1.7	R11G1.7	-1.00575	2.26014e-07	146.058	162.735	122.956	179.806	60.043	62.7752	87.1159	94.6464
CELE_C04G2.4	msp-36	0.899034	2.27328e-07	777.344	499.238	681.667	499.055	1125.53	1102.89	1222.81	1129.38
CELE_R09E10.2	R09E10.2	1.30909	2.27643e-07	17.6446	24.824	31.4767	21.0997	58.9513	49.7872	61.6186	64.87
CELE_C25H3.15	C25H3.15	-2.81601	2.27779e-07	25.4867	50.5674	18.6893	48.6211	5.45846	2.16466	9.56151	3.19033
CELE_C53C11.3	ptr-5	-1.39957	2.28926e-07	337.209	750.236	395.426	805.46	204.146	188.325	234.788	240.338
CELE_W04G3.1	lpr-6	-2.00895	2.30094e-07	806.752	1800.2	744.62	1793.48	194.321	163.432	458.952	461.534
CELE_B0395.2	mboa-1	-1.98405	2.32841e-07	172.525	405.458	198.697	408.234	40.3926	43.2932	109.426	106.344
CELE_Y34B4A.10	Y34B4A.10	-1.7127	2.33752e-07	181.348	423.846	178.04	439.425	72.0516	72.5161	117.925	110.598
CELE_F53C3.6	F53C3.6	-1.80343	2.33999e-07	50.9734	105.732	81.6426	146.781	19.6504	19.4819	37.1836	34.0302
CELE_C36F7.4	rig-5	-1.92545	2.36056e-07	172.525	364.085	138.694	333.009	29.4757	57.3635	87.1159	91.4561
CELE_VF13D12L.1	inos-1	-0.258682	2.36357e-07	3472.07	3719.92	3487.03	3755.75	3013.07	2968.83	3092.62	2992.53
CELE_F40A3.4	F40A3.4	-2.22627	2.36357e-07	34.309	62.5196	28.5257	75.2252	13.1003	3.24699	13.8111	12.7613
CELE_B0491.3	rmd-3	0.941888	2.37702e-07	142.137	98.3765	131.809	79.8121	206.33	191.572	245.412	223.323
CELE_C45G7.3	ilys-3	-1.69953	2.39422e-07	58.8154	103.893	62.9534	98.1597	27.2923	9.74097	32.9341	29.7764
CELE_B0511.1	fkb-7	-1.42649	2.42145e-07	331.327	603.131	351.162	609.14	115.719	136.374	206.104	246.719
CELE_Y47D3A.13	Y47D3A.13	1.00429	2.42145e-07	51.9536	47.8091	75.7408	53.208	109.169	123.386	104.114	121.232
CELE_R04B3.1	R04B3.1	-2.3731	2.43078e-07	51.9536	144.347	57.0515	162.376	13.1003	8.65864	30.8093	27.6495
CELE_F56B3.10	gst-40	-1.57466	2.44388e-07	45.0918	61.6002	38.3622	75.2252	18.5588	15.1526	16.9982	23.3957
CELE_F46F3.1	ceh-27	-1.06234	2.46479e-07	349.952	557.16	351.162	615.562	215.063	188.325	259.223	235.021
CELE_F30A10.8	stn-1	-1.38703	2.4916e-07	413.669	787.931	417.066	766.93	165.937	181.831	262.41	302.018
CELE_Y46B2A.1	fbxc-51	-0.739112	2.4916e-07	1475.29	2038.32	1484.32	2082.45	983.614	944.874	1194.13	1119.81
CELE_D1009.5	dylt-2	-3.11701	2.4916e-07	15.6841	30.3404	17.7056	38.53	2.18338	4.32932	2.12478	3.19033
CELE_Y43C5A.1	nspd-7	0.873108	2.49365e-07	150.96	136.992	153.449	105.499	217.247	221.878	270.909	290.32
CELE_T25B9.3	T25B9.3	-1.96465	2.50056e-07	48.0326	99.2959	51.1496	119.259	16.3754	11.9056	20.1854	32.9667
CELE_T01B4.2	twk-22	0.776022	2.50748e-07	110.769	81.8272	116.07	111.003	167.029	180.749	180.606	189.293
CELE_F23B2.4	daf-10	-1.91464	2.55008e-07	63.7167	160.896	73.7735	137.607	20.7421	16.235	35.0589	43.6011
CELE_F46C8.8	F46C8.8	-1.79771	2.55774e-07	254.867	604.05	278.372	627.488	87.3353	83.3394	186.981	149.945
CELE_F10B5.4	tub-1	-1.66726	2.57404e-07	58.8154	148.024	85.5772	160.542	28.384	34.6346	36.1212	43.6011
CELE_Y64H9A.2	Y64H9A.2	-2.49308	2.58873e-07	120.572	268.467	99.3483	251.362	10.9169	15.1526	42.4956	62.7431
CELE_ZC477.7	ZC477.7	0.847057	2.60061e-07	61.7562	55.1644	63.937	51.3733	100.436	104.986	113.676	97.8367
CELE_Y73E7A.8	Y73E7A.8	-2.04597	2.61921e-07	331.327	787.931	354.113	841.237	61.1347	103.904	197.604	197.8
CELE_Y71F9B.9	Y71F9B.9	-1.3955	2.61993e-07	162.723	255.595	119.021	272.462	70.9599	58.4458	88.1783	90.3926
CELE_Y54E2A.7	Y54E2A.7	1.20314	2.62204e-07	32.3485	26.6628	25.5748	24.7693	67.6849	51.9519	67.9929	63.8066
CELE_F32H5.7	twk-43	-1.53649	2.62364e-07	97.0455	171.01	91.4791	159.624	26.2006	45.4579	59.4938	47.8549
CELE_T01E8.9	ubxn-5	1.09045	2.63166e-07	64.697	50.5674	52.1332	41.2821	113.536	82.2571	123.237	124.423
CELE_F13E6.2	F13E6.2	-1.86575	2.63166e-07	56.8549	142.508	59.0188	124.764	22.9255	27.0583	35.0589	20.2054
CELE_Y49F6C.3	bath-9	-0.913838	2.66523e-07	399.945	525.9	332.472	559.602	210.696	231.619	257.098	265.861
CELE_F28F9.1	zag-1	-1.86541	2.66989e-07	687.16	1486.68	703.307	1669.63	194.321	185.078	441.954	426.44
CELE_W03G1.1	glt-7	-1.6806	2.6719e-07	32.3485	51.4868	41.3131	56.8776	8.73353	12.988	18.0606	17.0151
CELE_F56E10.2	daam-1	-1.75709	2.69239e-07	269.571	645.423	278.372	634.827	80.7852	109.315	169.982	180.785
CELE_C48B4.1	acox-1.5	1.33645	2.69297e-07	1285.12	1219.13	1220.7	1165.99	4002.14	3963.49	2251.2	2134.33
CELE_C37H5.1	nex-4	-1.51116	2.69773e-07	70.5785	124.12	56.0678	119.259	34.9341	29.2229	37.1836	28.7129
CELE_Y39B6A.27	Y39B6A.27	1.72992	2.69773e-07	49.0129	21.1463	57.0515	22.9345	118.994	115.809	132.799	128.677
CELE_F35A5.4	idpp-5	-1.7355	2.71191e-07	90.1837	204.108	79.6753	189.898	32.7507	33.5522	47.8075	55.299
CELE_R10H10.5	gpa-7	-1.27099	2.7146e-07	232.321	430.282	250.83	477.038	126.636	127.715	173.169	148.882
CELE_F46G11.4	F46G11.4	-1.52623	2.71706e-07	51.9536	93.7795	48.1987	87.1511	27.2923	20.5643	28.6845	21.2689
CELE_K08E3.10	mlc-7	0.453966	2.71974e-07	439.155	433.96	443.624	399.978	561.129	553.071	584.314	651.89
CELE_T14B4.7	dpy-10	-1.7726	2.72412e-07	1240.03	2714.09	1206.93	2507.2	342.791	353.922	788.293	759.298
CELE_F59D12.1	pcdr-1	-1.51509	2.73904e-07	148.999	339.261	131.809	281.636	74.235	68.1868	87.1159	86.1388
CELE_F40G12.10	F40G12.10	1.27911	2.75569e-07	42.1511	28.5016	30.493	32.1083	62.2264	61.6928	95.6151	103.154
CELE_T20G5.5	epac-1	-2.31235	2.76874e-07	30.388	76.3107	26.5584	74.3078	9.82522	7.57631	12.7487	11.6979
CELE_T05A12.4	T05A12.4	-0.495552	2.76883e-07	627.365	788.851	670.847	761.425	498.903	496.79	514.197	511.516
CELE_T23B3.5	T23B3.5	0.948639	2.79267e-07	121.552	101.135	125.907	96.3249	199.78	167.761	245.412	244.592
CELE_C28A5.6	C28A5.6	0.78905	2.79782e-07	81.3614	68.0361	86.5609	72.473	136.461	128.797	146.61	120.169
CELE_ZK993.1	ceh-45	-1.36866	2.86908e-07	103.907	159.057	120.988	166.963	46.9427	32.4699	58.4314	75.5044
CELE_C27F2.1	wdr-60	-1.62093	2.86908e-07	51.9536	114.926	60.9861	108.251	18.5588	25.9759	32.9341	31.9033
CELE_F55G11.3	F55G11.3	5.33775	2.86908e-07	8.82232	0.919406	0.983646	0	147.378	165.597	55.2443	61.6797
CELE_F52D10.1	abts-2	-0.817898	2.86908e-07	119.591	123.2	118.038	122.012	65.5015	56.2812	80.7416	71.2507
CELE_ZK512.1	ZK512.1	-1.41046	2.87684e-07	162.723	316.276	159.351	247.693	68.7766	55.1988	101.989	107.408
CELE_Y57A10C.6	daf-22	0.462124	2.88355e-07	1830.14	1891.22	1922.04	1795.31	2548.01	2568.37	2572.05	2558.64
CELE_Y46C8AL.4	clec-71	2.01118	2.89783e-07	26.467	32.1792	15.7383	45.869	153.928	142.868	98.8022	90.3926
CELE_F26D10.9	atgp-1	-1.27916	2.89783e-07	1492.93	2922.79	1533.5	2822.78	705.233	774.948	1054.95	1079.39
CELE_F57C9.1	pdxk-1	0.457091	2.9123e-07	766.561	709.782	766.26	674.274	1050.21	1087.74	965.712	899.672
CELE_C34B7.1	C34B7.1	-1.4969	2.9123e-07	78.4206	136.992	69.8389	138.524	38.2092	28.1406	41.4332	42.5377
CELE_T02B11.3	T02B11.3	0.40529	2.9123e-07	1570.37	1702.74	1560.06	1757.7	2124.43	2178.73	2283.08	2143.9
CELE_C56E6.6	lron-15	-1.70771	2.92491e-07	106.848	244.562	117.054	231.18	34.9341	38.9639	69.0553	71.2507
CELE_C50H2.3	mec-9	-1.64864	2.92894e-07	68.618	138.83	65.9043	136.69	28.384	25.9759	39.3084	37.2205
CELE_F35E8.11	cdr-1	1.1823	2.93611e-07	49.0129	82.7466	58.0351	70.6383	159.387	194.819	125.362	112.725
CELE_C47E8.9	C47E8.9	-2.65452	2.95049e-07	17.6446	27.5822	18.6893	23.8519	5.45846	3.24699	4.24956	1.06344
CELE_F47G4.5	F47G4.5	-2.3538	2.98842e-07	28.4275	53.3256	23.6075	58.7123	4.36677	4.32932	14.8735	8.50754
CELE_W04B5.8	W04B5.8	-1.34771	3.02258e-07	107.828	189.398	95.4137	177.972	51.3095	51.9519	74.3673	46.7915
CELE_M02H5.8	M02H5.8	1.40344	3.02258e-07	190.17	93.7795	166.236	78.8947	307.857	313.876	388.835	387.093
CELE_Y26E6A.3	Y26E6A.3	0.83878	3.02258e-07	175.466	104.812	130.825	132.103	230.347	245.689	241.162	253.099
CELE_Y22D7AR.9	fbxa-74	0.826935	3.03619e-07	76.4601	85.5048	79.6753	80.7294	150.653	163.432	138.111	120.169
CELE_C25F6.2	dlg-1	-1.24258	3.04925e-07	3860.25	7035.3	3989.67	7180.33	1865.7	1898.41	2685.72	2875.55
CELE_F38B6.7	F38B6.7	-2.31411	3.05369e-07	16.6644	64.3585	36.3949	53.208	7.64184	9.74097	9.56151	7.4441
CELE_R148.1	mks-1	-2.15518	3.06074e-07	36.2695	97.4571	35.4113	93.5728	13.1003	15.1526	19.123	11.6979
CELE_C07B5.5	nuc-1	-0.326811	3.10199e-07	3181.92	3403.64	3311.94	3331.92	2836.21	2753.45	2507.24	2452.3
CELE_C44F1.3	lec-4	0.506982	3.15527e-07	879.291	787.931	872.494	826.559	1101.52	1059.6	1304.61	1316.54
CELE_F58F6.2	col-105	-2.89688	3.16475e-07	25.4867	81.8272	25.5748	58.7123	4.36677	6.49398	11.6863	3.19033
CELE_Y75B7AL.3	snt-3	-1.45331	3.17899e-07	146.058	291.452	142.629	303.653	61.1347	74.6808	95.6151	91.4561
CELE_R05D7.3	R05D7.3	-1.58266	3.18493e-07	70.5785	133.314	74.7571	144.946	26.2006	27.0583	36.1212	52.1087
CELE_M6.1	ifc-2	0.546244	3.20201e-07	2929.99	3574.65	3023.73	3830.06	5165.88	5129.16	4601.21	4613.21
CELE_F09E10.11	tts-1	-1.31561	3.20201e-07	5966.83	10207.3	4840.52	10695.7	3210.66	2628.98	3512.26	3388.13
CELE_ZK524.2	unc-13	-1.47078	3.21061e-07	566.589	1249.47	564.613	1195.35	264.189	259.759	385.647	380.712
CELE_H10D18.1	H10D18.1	-1.81315	3.21061e-07	39.2103	58.842	28.5257	54.1254	8.73353	12.988	18.0606	11.6979
CELE_C31H1.6	lntl-1	-1.18094	3.2203e-07	393.083	799.884	463.297	765.095	242.355	235.948	269.847	320.096
CELE_M153.4	znf-474	-1.46128	3.22233e-07	99.9863	214.222	97.381	176.137	43.6677	53.0342	58.4314	58.4893
CELE_Y46G5A.29	Y46G5A.29	1.44134	3.24395e-07	41.1708	37.6957	37.3786	33.0257	66.5932	74.6808	135.986	127.613
CELE_K02E7.6	K02E7.6	-1.14871	3.25657e-07	210.755	339.261	206.566	344.018	96.0688	104.986	151.922	143.565
CELE_ZC8.3	set-30	-1.34811	3.27268e-07	473.464	1000.31	484.938	921.967	210.696	266.253	334.653	320.096
CELE_Y65B4A.2	Y65B4A.2	-1.20476	3.27866e-07	238.203	424.766	229.19	408.234	115.719	123.386	157.234	168.024
CELE_B0495.7	B0495.7	0.305119	3.28531e-07	3549.51	3266.65	3779.17	3319.08	4334.01	4317.42	4266.56	4270.79
CELE_F34D10.8	F34D10.8	1.01796	3.28531e-07	45.0918	34.018	45.2477	31.1909	87.3353	70.3515	75.4297	80.8216
CELE_F22B7.1	F22B7.1	-1.26587	3.29691e-07	110.769	219.738	120.005	215.584	72.0516	69.2691	72.2425	63.8066
CELE_R04B5.9	ugt-47	1.48755	3.33405e-07	418.57	183.881	433.788	166.963	808.943	779.278	916.842	866.706
CELE_W01C8.4	set-20	-0.874222	3.35618e-07	407.787	593.937	388.54	610.975	259.823	246.771	296.407	289.256
CELE_Y55B1BR.6	Y55B1BR.6	-1.79986	3.36388e-07	89.2034	192.156	89.5118	173.385	18.5588	34.6346	55.2443	47.8549
CELE_F55H12.5	spe-54	0.929066	3.36652e-07	42.1511	45.0509	52.1332	40.3647	86.2436	79.0101	90.3031	86.1388
CELE_C46F11.1	unc-93	-1.84608	3.36652e-07	107.828	192.156	92.4627	208.245	32.7507	21.6466	53.1195	59.5528
CELE_R08F11.3	cyp-33C8	0.821228	3.37099e-07	117.631	157.219	127.874	137.607	208.513	212.137	247.537	287.129
CELE_F26B1.7	let-381	-1.43033	3.39174e-07	92.1442	182.962	108.201	139.442	34.9341	37.8816	67.9929	53.1721
CELE_C33D9.13	C33D9.13	-1.0626	3.42985e-07	266.63	358.569	219.353	355.943	113.536	119.056	157.234	185.039
CELE_K02G10.3	tmem-135	0.648023	3.43545e-07	203.894	187.559	215.419	193.567	334.058	310.629	288.97	320.096
CELE_C04G6.7	idpb-3	-1.73422	3.44568e-07	63.7167	134.233	65.9043	139.442	29.4757	25.9759	32.9341	32.9667
CELE_C17E7.13	C17E7.13	-2.28206	3.44568e-07	32.3485	81.8272	32.4603	82.5642	10.9169	5.41165	19.123	11.6979
CELE_F47D12.1	gar-2	-1.51199	3.47282e-07	139.197	319.034	171.154	331.174	76.4184	64.9398	95.6151	99.9636
CELE_B0250.5	B0250.5	0.521032	3.50834e-07	2086.97	1617.24	2097.13	1632.02	2697.57	2663.61	2608.17	2694.76
CELE_ZK849.2	gopc-1	-1.4882	3.51243e-07	85.2824	153.541	87.5445	178.889	31.6591	46.5402	59.4938	42.5377
CELE_Y37E11AR.6	vab-2	-1.21709	3.51607e-07	390.142	688.635	399.36	688.035	184.496	187.243	273.034	287.129
CELE_R07G3.2	lips-17	0.833728	3.53011e-07	74.4996	78.1495	66.8879	66.0514	108.077	119.056	140.235	141.438
CELE_F28D1.9	acs-20	-1.48503	3.5457e-07	780.285	1629.19	768.228	1502.67	327.507	293.312	495.074	556.18
CELE_F22D6.4	nduf-6	0.358453	3.56141e-07	1468.43	1284.41	1500.06	1408.18	1792.56	1828.06	1776.32	1858.9
CELE_K10C3.3	zig-1	-1.42543	3.56141e-07	359.754	662.892	372.802	662.348	148.47	125.55	239.038	253.099
CELE_M70.3	M70.3	0.945465	3.56141e-07	74.4996	46.8897	72.7898	50.4559	113.536	109.315	127.487	119.106
CELE_K07E3.2	K07E3.2	-0.706625	3.60695e-07	322.505	437.637	335.423	426.582	224.888	199.149	246.474	262.67
CELE_C06E7.4	C06E7.4	-1.29924	3.63336e-07	697.943	1163.97	686.585	1329.28	281.656	327.946	503.573	462.598
CELE_Y32F6A.4	Y32F6A.4	0.762468	3.65556e-07	863.607	885.388	912.824	1004.53	1829.67	1825.89	1276.99	1287.83
CELE_T19D7.1	lgc-32	1.13259	3.65556e-07	71.5588	47.8091	70.8225	42.1995	128.82	103.904	135.986	139.311
CELE_ZK1010.5	ZK1010.5	0.927776	3.66317e-07	108.809	100.215	111.152	68.8035	156.112	182.914	200.792	198.864
CELE_R07B1.8	R07B1.8	-2.09508	3.66317e-07	42.1511	97.4571	40.3295	99.077	12.0086	8.65864	20.1854	24.4592
CELE_Y77E11A.15	col-106	1.39179	3.66576e-07	16218.4	7254.12	16154.4	7001.44	29659.1	28940.4	32141.5	31611.9
CELE_T27C4.2	hpo-36	-1.61356	3.68493e-07	140.177	336.503	167.22	326.587	57.8596	58.4458	105.177	95.7098
CELE_K10F12.3	pll-1	-1.20179	3.68844e-07	198.992	391.667	232.14	366.952	114.628	119.056	148.735	135.057
CELE_F21H7.3	F21H7.3	-2.04535	3.69272e-07	33.3288	66.1973	32.4603	93.5728	10.9169	12.988	13.8111	17.0151
CELE_F08A8.3	acox-1.3	1.03982	3.69498e-07	121.552	94.6989	146.563	99.077	185.588	203.478	262.41	296.7
CELE_F29C4.8	col-99	-1.29942	3.7003e-07	760.68	1382.79	755.44	1359.56	328.599	337.687	557.755	506.199
CELE_R31.3	osm-6	-2.07447	3.72748e-07	40.1906	89.1824	41.3131	113.755	18.5588	8.65864	21.2478	19.142
CELE_F44C8.7	nstp-8	-2.65859	3.74327e-07	15.6841	34.018	19.6729	32.1083	5.45846	3.24699	4.24956	3.19033
CELE_R09H10.2	R09H10.2	-1.3127	3.74494e-07	56.8549	86.4242	48.1987	64.2166	22.9255	25.9759	30.8093	23.3957
CELE_C43C3.3	dyf-7	-1.52951	3.8096e-07	335.248	631.632	306.898	619.232	129.911	102.821	233.726	189.293
CELE_ZC513.12	sth-1	1.20633	3.81982e-07	46.0721	32.1792	32.4603	20.1824	68.7766	85.5041	79.6792	66.9969
CELE_T27A3.5	T27A3.5	0.895145	3.82872e-07	58.8154	56.0838	74.7571	62.3818	97.1605	109.315	138.111	123.359
CELE_Y104H12A.1	nhr-41	-1.37247	3.84978e-07	429.353	837.579	382.638	827.477	182.312	218.631	264.535	291.383
CELE_F58A3.1	ldb-1	-1.08507	3.90962e-07	1928.17	3360.43	1843.35	3226.43	1030.56	1085.58	1415.1	1351.64
CELE_C48E7.6	C48E7.6	-1.47745	3.91854e-07	268.591	584.743	245.912	555.932	136.461	117.974	154.046	186.102
CELE_Y119D3B.13	nspg-8	0.537674	3.92882e-07	446.017	461.542	452.477	456.855	610.256	589.87	706.489	730.585
CELE_K01A2.10	K01A2.10	-1.10504	4.00467e-07	197.032	385.231	244.928	394.473	135.37	138.538	146.61	147.819
CELE_W09C3.7	W09C3.7	0.573299	4.07319e-07	365.636	340.18	358.047	267.875	507.637	488.131	491.886	492.374
CELE_DY3.3	hlh-16	-1.14027	4.07319e-07	104.888	148.024	97.381	162.376	41.4843	54.1165	62.681	74.441
CELE_F13G3.8	eat-5	-1.54737	4.08062e-07	41.1708	51.4868	38.3622	63.2992	15.2837	17.3173	14.8735	19.142
CELE_K02E7.5	K02E7.5	-1.84355	4.08931e-07	80.3811	192.156	102.299	189.898	22.9255	27.0583	64.8058	42.5377
CELE_F53C11.8	swan-1	-0.358254	4.11741e-07	1326.29	1490.36	1259.07	1383.41	1078.59	1006.57	1105.95	1068.76
CELE_C37E2.1	idhb-1	0.259453	4.12248e-07	1969.34	2118.31	2077.46	2054.01	2446.48	2443.9	2410.56	2538.44
CELE_C07E3.9	C07E3.9	0.418248	4.12361e-07	338.189	353.052	336.407	323.835	475.977	448.085	438.767	443.456
CELE_F59F3.2	col-177	-1.8832	4.1326e-07	64.697	125.039	57.0515	128.433	17.4671	15.1526	32.9341	36.157
CELE_T23F11.2	T23F11.2	1.11672	4.15561e-07	41.1708	34.018	62.9534	53.208	86.2436	90.9157	126.424	110.598
CELE_F26E4.9	cox-5B	0.32383	4.17205e-07	5086.56	4613.58	4876.92	4480.48	5956.27	5913.85	6159.73	5821.28
CELE_F52C9.5	F52C9.5	-1.93604	4.17205e-07	38.23	93.7795	36.3949	81.6468	14.192	11.9056	21.2478	18.0785
CELE_C02C2.5	sup-18	-1.57906	4.17273e-07	78.4206	131.475	75.7408	123.846	18.5588	25.9759	43.558	48.9184
CELE_C14H10.2	C14H10.2	-1.35233	4.18114e-07	999.863	1977.64	1017.09	2095.3	496.72	461.073	708.614	718.887
CELE_C33D9.3	C33D9.3	0.708832	4.18677e-07	143.118	137.911	135.743	144.946	220.522	181.831	248.599	266.924
CELE_B0478.3	B0478.3	-2.78493	4.21687e-07	22.5459	34.9374	14.7547	38.53	5.45846	1.08233	5.31195	4.25377
CELE_K05B2.3	ifa-4	0.355154	4.21758e-07	1078.28	1115.24	1163.65	1147.64	1368.98	1423.26	1581.9	1387.79
CELE_F25F8.1	F25F8.1	-1.36164	4.23972e-07	302.9	599.453	279.356	555.015	151.745	130.962	186.981	206.308
CELE_C30E1.5	fbxb-114	-2.95748	4.24651e-07	29.4077	62.5196	27.5421	63.2992	3.27507	0	7.43673	12.7613
CELE_F38A5.3	lec-11	0.619746	4.2915e-07	217.617	286.855	236.075	292.644	432.31	408.039	370.774	378.586
CELE_Y65A5A.1	Y65A5A.1	-0.990525	4.31936e-07	324.465	460.623	316.734	500.889	168.12	171.008	212.478	255.226
CELE_R02C2.7	R02C2.7	0.690208	4.31936e-07	211.736	245.482	214.435	207.328	316.591	326.864	407.958	366.888
CELE_T19B10.9	mam-4	-1.57065	4.31936e-07	61.7562	114.926	70.8225	124.764	24.0172	20.5643	41.4332	39.3474
CELE_ZK180.1	gbb-2	-1.25383	4.32339e-07	235.262	438.557	200.664	410.986	136.461	122.303	144.485	136.121
CELE_F14B8.5	F14B8.5	-1.34309	4.32339e-07	688.141	1317.51	613.795	1315.52	311.132	335.522	417.519	487.057
CELE_T16G1.5	T16G1.5	0.981841	4.3277e-07	40.1906	50.5674	46.2314	56.8776	91.7021	97.4097	110.489	84.012
CELE_F09F7.5	F09F7.5	0.645891	4.33954e-07	443.076	548.886	422.968	492.633	847.153	814.995	666.118	658.271
CELE_C49H3.1	gcy-8	-1.99448	4.35292e-07	38.23	82.7466	34.4276	79.8121	18.5588	12.988	11.6863	15.9516
CELE_R10F2.1	cdh-1	-1.41318	4.36344e-07	727.351	1645.74	781.999	1540.28	331.874	387.474	492.949	550.863
CELE_C31H5.6	C31H5.6	0.979833	4.40656e-07	284.275	321.792	314.767	278.884	733.617	726.244	489.762	416.869
CELE_ZC116.5	ZC116.5	1.09653	4.44823e-07	35.2893	30.3404	32.4603	23.8519	69.8683	57.3635	70.1177	62.7431
CELE_C18E9.7	C18E9.7	-1.61527	4.45024e-07	231.341	450.509	220.337	449.516	72.0516	75.7631	137.048	156.326
CELE_T07C4.7	mev-1	0.3514	4.50236e-07	3424.04	3058.87	3270.62	3136.52	4072.01	4348.8	3928.72	4094.25
CELE_C10A4.10	C10A4.10	0.811922	4.52097e-07	68.618	74.4719	85.5772	62.3818	117.903	122.303	133.861	136.121
CELE_F53B2.6	ham-1	-0.8961	4.52669e-07	772.443	1111.56	725.931	1134.8	424.668	467.567	606.624	513.643
CELE_B0304.1	hlh-1	-1.15355	4.53478e-07	308.781	527.739	311.816	538.502	151.745	165.597	228.414	212.689
CELE_C37E2.2	C37E2.2	-1.52854	4.53478e-07	59.7957	110.329	64.9206	111.003	18.5588	24.8936	38.246	38.2839
CELE_M05B5.2	let-522	-1.40136	4.53614e-07	510.714	984.684	510.512	1034.8	210.696	227.289	359.088	354.126
CELE_F13D12.2	ldh-1	0.368593	4.53614e-07	2143.82	2100.84	2175.83	2079.7	2567.66	2546.72	2924.76	2934.04
CELE_F12D9.1	stg-2	-2.34451	4.53736e-07	32.3485	59.7614	19.6729	45.869	5.45846	3.24699	9.56151	12.7613
CELE_Y69A2AR.31	Y69A2AR.31	-1.44904	4.5381e-07	316.623	631.632	290.176	614.645	146.287	119.056	200.792	212.689
CELE_C53B7.2	C53B7.2	0.453184	4.54213e-07	315.643	296.049	291.159	281.636	411.568	415.615	403.708	390.283
CELE_T13C2.3	T13C2.3	-1.79272	4.55693e-07	182.328	443.154	228.206	481.625	52.4012	75.7631	129.612	127.613
CELE_B0334.1	ttr-18	0.749662	4.56732e-07	465.622	539.692	429.853	545.841	716.15	689.444	986.96	939.02
CELE_F27D9.8	stn-2	-1.69253	4.5896e-07	170.565	404.539	157.383	368.787	61.1347	63.8575	109.426	106.344
CELE_C04G2.3	C04G2.3	0.992228	4.61664e-07	92.1442	69.8749	106.234	65.134	160.479	149.362	168.92	182.912
CELE_T08B2.12	T08B2.12	1.36156	4.66323e-07	31.3682	20.2269	29.5094	15.5955	54.5846	79.0101	62.681	51.0452
CELE_C44B7.6	slc-36.5	-1.34407	4.66323e-07	87.2429	143.427	80.659	151.368	33.8424	46.5402	46.7451	55.299
CELE_F38A6.1	pha-4	-1.18552	4.66323e-07	959.672	1836.05	999.385	1827.42	524.012	530.342	741.548	676.349
CELE_K11G9.4	egl-46	-1.63847	4.66658e-07	682.259	1376.35	694.454	1507.26	217.247	238.113	477.013	436.011
CELE_F55H2.2	vha-14	0.364527	4.69178e-07	5135.57	5627.69	5256.61	5606.11	7323.07	7214.81	6633.56	6673.1
CELE_T20B6.3	idpa-1	-1.39832	4.69976e-07	142.137	289.613	146.563	300.901	63.3181	83.3394	99.8646	87.2023
CELE_T06D8.10	T06D8.10	-1.76722	4.72051e-07	410.728	971.813	439.69	1017.37	143.012	134.209	268.785	288.193
CELE_T19A5.4	nhr-44	-1.1914	4.72287e-07	153.9	292.371	170.171	292.644	80.7852	104.986	106.239	106.344
CELE_W02D3.5	lbp-6	1.19347	4.77328e-07	3259.36	1766.18	3159.47	1738.44	5388.59	5357.53	5986.57	5960.6
CELE_F46C8.6	dpy-7	-1.78397	4.78525e-07	1447.84	3182.07	1384.97	2960.39	443.227	353.922	903.031	906.053
CELE_Y51H1A.3	ndub-8	0.271924	4.85506e-07	3811.24	3589.36	3467.35	3426.41	4479.21	4328.24	4285.68	4165.5
CELE_VF13D12L.3	VF13D12L.3	0.796895	4.86556e-07	2997.63	1957.42	2910.61	1910.9	4091.66	3986.22	4405.73	4499.43
CELE_T13G4.3	tmc-1	-1.52487	4.86556e-07	209.775	393.506	157.383	418.325	87.3353	84.4218	121.112	116.979
CELE_F11D5.1	F11D5.1	-1.15222	4.89339e-07	738.134	1503.23	813.475	1409.1	457.419	447.002	569.441	534.912
CELE_F09C6.9	nhr-116	-1.44753	4.94747e-07	67.6378	102.054	54.1005	106.416	18.5588	31.3876	37.1836	34.0302
CELE_R03A10.6	sprr-1	-1.43646	4.95296e-07	51.9536	68.0361	43.2804	66.0514	21.8338	17.3173	23.3726	22.3323
CELE_ZK829.4	gdh-1	0.291771	4.96007e-07	32239.7	34401.4	32417	34141.2	42401.3	42259.6	39278.7	39117.7
CELE_D1086.17	D1086.17	0.939028	5.01626e-07	92.1442	68.9555	80.659	56.8776	137.553	113.645	155.109	164.834
CELE_ZK112.7	cdh-3	-1.35992	5.02384e-07	425.432	927.681	447.559	866.924	211.788	217.548	299.594	310.525
CELE_R07H5.2	cpt-2	0.289687	5.02384e-07	2564.35	2605.6	2831.92	2570.5	3290.36	3384.45	3066.06	3181.82
CELE_B0564.10	unc-30	-1.46379	5.04366e-07	119.591	220.658	113.119	202.741	43.6677	44.3755	79.6792	70.1872
CELE_C45B11.6	C45B11.6	-1.37393	5.08138e-07	111.749	205.947	110.168	205.493	39.3009	61.6928	71.1801	72.3141
CELE_F36A2.6	rps-15	0.270882	5.11885e-07	24575.1	22591.7	23955.7	22702.4	28829.4	28997.8	28561.3	26813.6
CELE_E01G6.2	E01G6.2	-1.30569	5.11885e-07	175.466	330.986	165.253	314.661	86.2436	85.5041	122.175	105.281
CELE_T14F9.4	peb-1	-1.53199	5.19188e-07	364.656	824.708	374.769	829.312	170.304	149.362	247.537	260.543
CELE_F52A8.2	gpb-2	-1.19821	5.1981e-07	549.924	949.747	523.3	1026.55	270.739	285.735	384.585	388.157
CELE_Y71F9AM.6	trap-1	0.56663	5.23741e-07	10080	7862.76	9866.95	7677.55	13855.7	13465.3	12648.8	12586.9
CELE_F26E4.6	cox-7C	0.412822	5.33388e-07	6697.12	6407.34	6527.48	6121.68	8433.32	8369.66	9022.87	8458.62
CELE_R53.3	egl-43	-1.59175	5.34989e-07	401.906	905.615	434.772	957.745	169.212	154.773	285.783	286.066
CELE_Y71F9B.8	lron-11	-1.01105	5.48417e-07	813.614	1321.19	828.23	1314.61	466.152	448.085	631.059	577.449
CELE_R04F11.4	twk-13	-1.75657	5.48417e-07	174.486	359.488	171.154	387.134	46.9427	55.1988	109.426	111.661
CELE_F09F7.1	molo-1	-1.53012	5.51742e-07	61.7562	137.911	67.8716	125.681	31.6591	27.0583	39.3084	38.2839
CELE_B0250.12	B0250.12	-1.23929	5.54351e-07	116.651	197.672	106.234	171.55	43.6677	58.4458	77.5544	71.2507
CELE_F46F6.4	dyf-6	-1.71599	5.54351e-07	65.6773	138.83	76.7244	155.037	24.0172	21.6466	47.8075	39.3474
CELE_W09H1.1	W09H1.1	-1.58499	5.55019e-07	33.3288	43.2121	31.4767	49.5385	10.9169	15.1526	13.8111	12.7613
CELE_T04B2.6	dhs-31	0.863577	5.5962e-07	52.9339	61.6002	69.8389	73.3904	100.436	113.645	127.487	127.613
CELE_C02H7.3	aex-3	-1.20673	5.60436e-07	445.037	835.74	447.559	867.842	246.722	257.595	311.28	309.462
CELE_ZK757.2	ZK757.2	-1.7296	5.61751e-07	69.5983	149.863	65.9043	122.929	16.3754	24.8936	44.6204	37.2205
CELE_Y41C4A.19	col-96	1.35651	5.62994e-07	257.808	107.571	249.846	130.268	436.677	429.685	509.947	530.658
CELE_R151.1	R151.1	-1.48866	5.68066e-07	123.512	219.738	109.185	230.262	51.3095	40.0462	77.5544	74.441
CELE_F36D1.8	F36D1.8	-2.98284	5.69039e-07	21.5657	33.0986	11.8038	26.604	0	3.24699	5.31195	3.19033
CELE_Y22D7AR.10	spex-3	1.10036	5.69765e-07	807.732	425.685	721.996	474.285	1288.2	1276.07	1340.74	1302.72
CELE_K02A4.2	gpc-1	-1.86738	5.69765e-07	62.7365	128.717	61.9697	137.607	26.2006	12.988	33.9965	34.0302
CELE_Y18H1A.14	Y18H1A.14	-2.99487	5.73046e-07	18.6249	37.6957	13.771	23.8519	3.27507	2.16466	3.18717	3.19033
CELE_T06A4.3	T06A4.3	-1.27923	5.73399e-07	308.781	588.42	287.225	583.454	153.928	156.938	205.041	212.689
CELE_Y63D3A.3	fbxb-101	-1.21646	5.73399e-07	79.4009	135.153	96.3973	144.946	44.7593	36.7992	56.3066	58.4893
CELE_F54B11.6	bra-1	-0.580206	5.7412e-07	299.959	366.843	311.816	302.735	210.696	192.655	223.102	230.767
CELE_C41G7.5	ahr-1	-1.80438	5.75473e-07	56.8549	108.49	51.1496	112.838	15.2837	21.6466	18.0606	39.3474
CELE_C11E4.6	C11E4.6	-1.24988	5.76996e-07	551.885	1188.79	629.534	1141.22	298.032	350.675	415.394	412.616
CELE_F42F12.7	nspc-14	0.556415	5.77458e-07	766.561	773.221	737.735	770.599	1051.3	1016.31	1290.8	1124.06
CELE_K08B4.2	cpg-20	-1.26641	5.78072e-07	103.907	139.75	78.6917	146.781	32.7507	42.2109	58.4314	61.6797
CELE_K03D10.1	kal-1	-1.12372	5.78943e-07	850.863	1471.97	779.048	1369.65	410.476	449.167	606.624	585.957
CELE_T05A1.2	col-122	1.3937	5.84188e-07	40906.1	17972.6	38918.9	17798.1	74399.9	71338.6	78818.7	79170.1
CELE_Y57G11C.17	hhat-2	-1.67375	5.93811e-07	148.019	353.971	154.432	348.604	55.6763	60.6105	88.1783	110.598
CELE_F40H3.5	hst-3.1	-1.5232	5.94927e-07	49.0129	92.8601	52.1332	92.6554	26.2006	21.6466	23.3726	28.7129
CELE_C02B10.1	ivd-1	0.480546	5.95971e-07	4529.77	3703.37	4596.58	3644.75	5696.45	5751.5	5739.03	5796.83
CELE_W07A12.7	rhy-1	1.14549	5.97261e-07	192.13	111.248	205.582	120.177	315.499	352.84	363.337	358.38
CELE_T15B7.2	hpo-8	0.51075	5.9899e-07	2943.71	2635.02	3080.78	2657.65	4044.72	4004.62	4075.33	3998.54
CELE_ZC123.4	cdk-14	-1.15966	6.00312e-07	288.196	537.853	253.781	466.946	160.479	160.185	182.731	189.293
CELE_C25A1.11	aha-1	-0.649443	6.00508e-07	743.035	1006.75	715.111	931.141	541.479	483.802	594.938	545.546
CELE_C27H5.8	glc-4	-1.5898	6.01318e-07	126.453	290.532	133.776	304.57	60.043	56.2812	75.4297	92.5195
CELE_F27E5.2	pax-3	-0.965433	6.06013e-07	192.13	233.529	145.58	254.114	98.2522	87.6688	111.551	125.486
CELE_B0416.1	tmc-2	-1.30995	6.06013e-07	284.275	571.871	284.274	516.485	151.745	125.55	190.168	200.991
CELE_Y73B6BL.21	sfrp-1	-1.68943	6.08465e-07	160.762	373.279	147.547	320.166	46.9427	62.7752	98.8022	102.09
CELE_F07C3.7	aat-2	-1.20579	6.10224e-07	228.4	410.975	235.091	439.425	127.728	114.727	162.546	164.834
CELE_ZK813.5	ZK813.5	-1.7791	6.12606e-07	32.3485	60.6808	28.5257	62.3818	16.3754	11.9056	12.7487	12.7613
CELE_C16B8.4	C16B8.4	-1.2285	6.19479e-07	212.716	343.858	214.435	377.043	93.8855	100.657	131.736	163.77
CELE_T13C5.3	T13C5.3	-2.10445	6.20105e-07	34.309	45.9703	28.5257	61.4645	4.36677	5.41165	14.8735	14.8882
CELE_Y39G10AR.11	Y39G10AR.11	-1.12577	6.21231e-07	3357.38	6012.92	3357.18	6049.2	1798.02	1826.97	2476.43	2503.34
CELE_F42G4.5	F42G4.5	0.704794	6.21646e-07	275.452	271.225	269.519	331.174	540.387	535.753	388.835	406.235
CELE_B0285.7	mnp-1	-1.06468	6.22843e-07	1079.26	1831.46	1079.06	1901.73	602.614	603.94	809.541	800.772
CELE_T14B4.6	dpy-2	-1.79135	6.24416e-07	1205.72	2596.4	1216.77	2640.22	335.149	320.37	801.042	756.108
CELE_F57F4.4	bcf-1	1.09545	6.24416e-07	5325.74	4971.23	5916.63	5389.61	12553.4	11957.6	10703.6	10947.1
CELE_C24H11.8	twk-39	-1.58894	6.24793e-07	115.67	251.917	120.005	264.205	55.6763	50.8695	73.3049	70.1872
CELE_T03F1.6	T03F1.6	-1.00437	6.25703e-07	326.426	506.593	321.652	556.85	191.046	192.655	230.539	239.275
CELE_C46H11.11	fhod-1	-1.27608	6.2902e-07	1304.72	2748.11	1282.67	2657.65	712.874	751.137	915.78	920.941
CELE_Y38F2AL.1	nsy-4	-1.56289	6.30323e-07	740.094	1642.98	779.048	1601.75	296.94	275.994	520.571	518.96
CELE_H04M03.1	pck-3	1.06523	6.34766e-07	54.8944	45.0509	50.166	43.1169	76.4184	109.315	124.3	93.5829
CELE_C18H7.2	inx-18	-2.08052	6.385e-07	86.2627	231.69	93.4464	244.94	19.6504	29.2229	61.6186	44.6646
CELE_C30F8.4	kin-32	-0.852228	6.4592e-07	588.154	925.842	596.09	877.933	358.075	397.215	446.204	454.09
CELE_T23E7.6	T23E7.6	-1.48075	6.47903e-07	246.045	519.465	242.961	547.676	112.444	111.48	156.171	177.595
CELE_F53F4.5	fmo-4	0.548213	6.53945e-07	560.707	682.2	574.449	683.448	829.685	830.147	1026.27	971.986
CELE_T28F4.1	T28F4.1	-0.865675	6.55921e-07	972.415	1548.28	965.941	1417.35	598.247	623.422	746.86	723.141
CELE_T08B1.1	T08B1.1	0.977477	6.61885e-07	1053.78	1119.84	1086.93	1017.37	2324.21	2323.76	1898.49	1876.98
CELE_E01G4.7	E01G4.7	-0.740043	6.62355e-07	185.269	180.204	165.253	176.137	109.169	76.8455	116.863	120.169
CELE_F10G8.8	F10G8.8	-1.40284	6.62806e-07	1022.41	2113.72	1006.27	2174.19	458.51	485.966	756.421	688.047
CELE_T27F7.2	shc-2	-1.14193	6.63021e-07	571.49	1073.87	607.893	1018.29	316.591	301.97	435.58	428.567
CELE_F56D3.1	F56D3.1	-1.75382	6.65607e-07	1098.87	2507.22	1057.42	2376.01	332.966	325.781	712.863	715.697
CELE_T25G12.7	dhs-30	0.539478	6.6583e-07	621.483	480.85	549.858	480.707	707.416	773.866	811.666	805.026
CELE_W06A7.4	W06A7.4	0.973671	6.69191e-07	83.3219	65.2779	107.217	66.9687	132.095	159.103	188.043	153.136
CELE_F12B6.2	slc-17.6	0.786367	6.69225e-07	419.55	286.855	405.262	312.827	658.29	698.103	539.694	559.371
CELE_F12F3.1	exp-2	-1.36675	6.71275e-07	149.979	342.939	168.203	310.074	74.235	98.4921	104.114	99.9636
CELE_C34B4.1	max-1	-1.51669	6.72994e-07	336.228	730.009	379.687	743.078	137.553	140.703	251.786	235.021
CELE_F32B6.5	sss-1	0.964844	6.80188e-07	237.222	154.46	295.094	174.302	371.175	424.273	445.141	438.138
CELE_F54F11.2	nep-17	0.744647	6.80778e-07	8991.9	13265.2	9150.86	13172.7	20193	20035	16661.5	17810.5
CELE_C28A5.4	ceh-43	-1.0597	6.81003e-07	589.135	926.762	589.204	869.676	276.198	285.735	410.082	455.153
CELE_C09B9.8	hot-9	-1.80263	6.84453e-07	64.697	154.46	59.0188	133.937	24.0172	42.2109	26.5597	25.5226
CELE_ZK836.3	ZK836.3	-1.82141	6.85591e-07	94.1047	197.672	82.6263	220.171	34.9341	25.9759	41.4332	65.9334
CELE_K02E10.4	K02E10.4	-1.82336	6.90948e-07	426.412	1007.67	448.543	1041.23	118.994	135.291	287.908	283.939
CELE_Y71G12B.25	Y71G12B.25	-1.48834	6.93627e-07	852.824	1566.67	782.982	1672.38	307.857	297.641	554.567	577.449
CELE_T08A9.9	spp-5	0.383044	7.02422e-07	10957.3	13131.9	11121.1	13072.7	16068.6	16163.5	15350.5	15385.9
CELE_Y46E12A.1	cnc-6	2.98564	7.2043e-07	3.92103	13.7911	1.96729	8.25642	41.4843	35.7169	59.4938	86.1388
CELE_C47E12.6	mam-2	-1.75521	7.2115e-07	122.532	265.708	120.988	275.214	37.1175	42.2109	84.9912	68.0603
CELE_C42D4.18	C42D4.18	-1.01211	7.2533e-07	98.0257	122.281	93.4464	133.937	46.9427	47.6225	71.1801	56.3625
CELE_C02F12.5	C02F12.5	1.48459	7.33347e-07	180.367	70.7943	162.302	69.7209	328.599	299.805	345.277	376.459
CELE_C16E9.2	C16E9.2	-0.445855	7.33347e-07	512.675	555.321	478.052	561.437	394.101	411.286	356.963	386.03
CELE_F39H12.4	igcm-1	-1.58099	7.37073e-07	576.391	1246.72	560.678	1169.66	200.871	205.643	393.084	388.157
CELE_B0222.6	col-144	-1.43088	7.53124e-07	4835.61	10423.3	4568.05	11119.6	2519.62	2281.55	3360.34	3316.88
CELE_C16B8.2	C16B8.2	-1.68712	7.53536e-07	54.8944	114.926	64.9206	110.086	20.7421	14.0703	37.1836	35.0936
CELE_F15C11.1	sem-4	-1.37635	7.55034e-07	538.161	1132.71	530.185	1174.25	274.015	269.5	378.211	378.586
CELE_Y106G6A.4	Y106G6A.4	0.962259	7.58043e-07	93.1245	61.6002	92.4627	54.1254	135.37	130.962	166.795	152.072
CELE_T10E10.2	col-167	-1.37688	7.58043e-07	1799.75	4191.57	1818.76	4021.79	969.422	1084.49	1166.5	1335.68
CELE_F32D8.15	F32D8.15	-1.74264	7.64124e-07	32.3485	80.9078	47.215	83.4816	16.3754	18.3996	21.2478	17.0151
CELE_ZK354.2	ZK354.2	0.956633	7.64432e-07	93.1245	79.9884	122.956	77.9773	173.579	138.538	200.792	211.625
CELE_T23G5.5	dat-1	-1.64026	7.6599e-07	63.7167	127.797	57.0515	125.681	29.4757	19.4819	35.0589	36.157
CELE_T13H10.1	kin-5	1.29665	7.69383e-07	29.4077	26.6628	32.4603	13.7607	57.8596	55.1988	69.0553	68.0603
CELE_C16D9.1	C16D9.1	-1.70518	7.71053e-07	97.0455	193.995	75.7408	150.45	33.8424	25.9759	46.7451	52.1087
CELE_H04M03.12	H04M03.12	-1.32468	7.71289e-07	63.7167	103.893	60.0024	97.2423	30.5674	23.8113	36.1212	39.3474
CELE_C37C3.17	C37C3.17	-2.7394	7.72409e-07	18.6249	29.421	12.7874	32.1083	3.27507	3.24699	4.24956	3.19033
CELE_T28C6.4	col-117	-1.5526	7.73709e-07	707.746	1676.08	667.896	1654.04	375.542	297.641	452.578	478.549
CELE_F23H12.5	F23H12.5	-1.73672	7.833e-07	322.505	718.976	335.423	745.83	99.3439	102.821	209.291	225.45
CELE_F59B2.8	F59B2.8	-1.51092	7.84031e-07	74.4996	167.332	90.4954	153.202	27.2923	40.0462	53.1195	49.9818
CELE_C01B10.3	C01B10.3	0.810047	7.85525e-07	297.018	194.914	297.061	199.989	444.318	444.838	437.704	405.172
CELE_K03H6.1	K03H6.1	-1.87194	7.8558e-07	34.309	36.7763	27.5421	50.4559	8.73353	6.49398	10.6239	14.8882
CELE_F46C5.2	F46C5.2	-1.50258	7.90803e-07	62.7365	100.215	61.9697	121.094	18.5588	28.1406	33.9965	41.4743
CELE_W01C8.3	set-19	-1.0265	7.92622e-07	987.119	1644.82	1019.06	1697.15	578.596	589.87	750.047	707.189
CELE_F48F5.6	F48F5.6	-1.36827	7.93793e-07	47.0524	80.9078	56.0678	76.1425	17.4671	30.3052	21.2478	31.9033
CELE_ZC123.3	zfh-2	-1.30943	7.93799e-07	1257.67	2639.62	1192.18	2620.04	685.582	693.774	836.101	895.419
CELE_Y47G6A.15	Y47G6A.15	1.55403	7.95404e-07	427.392	305.243	429.853	265.123	796.935	774.948	1315.24	1303.78
CELE_T04F8.4	cutl-11	-1.85212	7.95404e-07	59.7957	133.314	50.166	104.581	13.1003	19.4819	35.0589	28.7129
CELE_F53H4.5	gmeb-2	-1.80207	8.09175e-07	138.216	336.503	142.629	331.174	48.0344	43.2932	105.177	75.5044
CELE_F52H3.6	F52H3.6	0.89483	8.10907e-07	89.2034	77.2301	84.5936	90.8206	140.828	126.633	199.729	168.024
CELE_ZC506.4	mgl-1	-1.35211	8.2762e-07	61.7562	91.9406	60.0024	109.168	21.8338	34.6346	37.1836	32.9667
CELE_F26G1.7	msp-3	0.810386	8.31536e-07	274.472	176.526	269.519	197.237	376.634	353.922	446.204	430.694
CELE_W03C9.4	lin-29	0.780976	8.32297e-07	105.868	92.8601	106.234	80.7294	157.204	148.279	183.793	172.278
CELE_F42G8.19	ceph-41	-1.77336	8.33241e-07	31.3682	57.0032	32.4603	47.7038	12.0086	9.74097	10.6239	17.0151
CELE_F34D10.5	lin-48	-1.91586	8.40866e-07	35.2893	70.7943	28.5257	59.6297	13.1003	14.0703	16.9982	7.4441
CELE_K08A8.2	sox-2	-1.16991	8.43546e-07	783.226	1500.47	856.756	1454.96	439.952	400.462	568.378	633.812
CELE_C43H6.4	C43H6.4	-0.734368	8.51623e-07	381.32	548.886	469.199	593.545	269.648	279.241	311.28	338.175
CELE_Y54G2A.13	Y54G2A.13	1.06862	8.55772e-07	38.23	23.9046	32.4603	30.2735	64.4098	62.7752	61.6186	72.3141
CELE_T21B10.6	cutl-15	-1.39615	8.56396e-07	177.427	326.389	180.007	354.109	70.9599	77.9278	124.3	121.232
CELE_Y38F1A.1	Y38F1A.1	0.900856	8.56396e-07	67.6378	61.6002	79.6753	47.7038	102.619	114.727	133.861	126.55
CELE_T21H3.4	cutl-22	-2.14349	8.56396e-07	24.5064	47.8091	28.5257	50.4559	3.27507	6.49398	12.7487	11.6979
CELE_W04G3.8	lpr-3	-1.79428	8.56396e-07	2175.19	5137.64	2237.8	5148.34	651.74	647.234	1490.53	1448.41
CELE_F47C12.4	clec-79	0.807067	8.57257e-07	85.2824	63.439	82.6263	76.1425	128.82	120.139	145.547	142.501
CELE_C46C2.5	C46C2.5	0.79044	8.62197e-07	189.19	143.427	221.32	135.772	287.115	320.37	300.656	282.876
CELE_F38B2.6	F38B2.6	1.37047	8.67071e-07	43.1313	23.9046	50.166	33.9431	85.1519	83.3394	105.177	115.915
[truncated: 15,698 more rows]

## Sheet: Up
Locus ID	Symbol	log2FoldChange	padj	WT1	WT2	WT3	WT4	LT1	LT2	LT3	LT4
CELE_ZK6.10	dod-19	2.75041	1.46426e-301	922.422	990.201	927.578	987.101	6160.41	6183.35	6702.62	6712.45
CELE_F55G11.4	F55G11.4	4.7462	1.14726e-212	275.452	335.583	270.503	318.331	9681.12	9396.79	6674.99	6462.54
CELE_F35E12.7	dct-17	4.47039	6.83277e-199	44.1116	37.6957	38.3622	55.0428	978.156	965.439	964.65	981.557
CELE_C32H11.12	dod-24	2.78879	4.22103e-151	759.7	789.77	759.375	898.115	6056.7	5925.76	5042.1	5141.74
CELE_F55G11.8	F55G11.8	1.87719	1.29484e-110	242.124	232.61	210.5	231.18	860.253	887.511	791.48	828.422
CELE_F08G5.6	irg-4	3.25988	1.53806e-107	1526.26	1230.17	1691.87	1210.94	15968.2	15122.3	11692.7	11419.2
CELE_C17G10.5	lys-8	1.35025	9.18002e-98	3878.88	4118.94	3755.56	4199.77	10582.9	10441.2	9768.67	9884.7
CELE_Y38E10A.14	Y38E10A.14	4.00604	1.10464e-89	277.413	168.251	226.239	138.524	3642.97	3699.4	2772.84	2893.63
CELE_C14C6.5	C14C6.5	2.96504	2.02474e-89	1499.79	1471.05	1555.14	1376.99	13919.1	13664.4	9230.04	9278.54
CELE_Y37H2A.14	Y37H2A.14	4.10123	6.81156e-88	20.5854	15.6299	17.7056	21.0997	305.674	303.052	355.9	322.223
CELE_R01E6.3	cah-4	1.30017	3.00783e-85	2484.95	2589.05	2512.23	2400.78	6501.02	6547.02	5858.02	5688.35
CELE_F52E1.14	F52E1.14	1.07361	2.22105e-82	1847.79	1823.18	1890.57	1791.64	4110.22	4012.2	3757.67	3595.5
CELE_Y38E10A.15	nspe-7	4.54764	6.5492e-77	42.1511	23.9046	30.493	25.6866	893.004	848.547	564.129	545.546
CELE_K12H4.7	K12H4.7	1.38494	7.0335e-76	7026.49	7739.56	7459.97	7453.71	20758.5	20185.5	18019.2	18550.7
CELE_ZK1320.3	ZK1320.3	1.11932	9.25479e-73	1697.81	1665.96	1706.63	1613.67	3521.8	3446.14	3833.1	3717.8
CELE_Y54G2A.6	clec-85	2.40425	7.76752e-72	562.668	536.933	564.613	523.824	3342.76	3283.79	2502.99	2452.3
CELE_F56F10.1	F56F10.1	1.20634	2.68826e-71	1360.6	1290.85	1265.95	1335.71	3030.54	3020.78	2973.63	3096.74
CELE_F55G11.2	F55G11.2	2.82759	8.34527e-71	245.064	202.269	256.732	210.08	1661.55	1829.14	1465.04	1530.29
CELE_T10H4.12	cpr-3	1.78439	1.94526e-65	271.531	317.195	251.813	289.892	955.23	912.404	999.709	1029.41
CELE_F15B9.1	far-3	3.35891	9.77216e-64	103.907	73.5525	88.5282	75.2252	723.791	682.95	1009.27	1080.46
CELE_Y116F11B.3	pcp-4	1.44659	2.57214e-63	355.833	361.327	358.047	333.926	965.055	1011.98	925.341	937.956
CELE_F35E12.5	irg-5	4.24699	2.13289e-62	1274.33	737.364	1328.91	729.317	25078.3	24415.2	13966.2	13807.7
CELE_T04H1.9	tbb-6	2.4186	3.75082e-62	47.0524	44.1315	57.0515	45.869	248.906	254.348	269.847	262.67
CELE_Y41D4B.16	hpo-6	2.95257	5.0101e-61	342.11	220.658	332.472	256.866	2463.95	2421.17	2075.91	1952.48
CELE_F54D5.4	F54D5.4	1.61726	6.19698e-61	1275.31	1061	1134.14	955.91	3343.85	3406.09	3444.27	3381.75
CELE_F13D12.6	ctsa-1.2	1.7002	7.29396e-61	6724.57	6427.57	6073.03	6513.4	22781.4	22477.8	19203.8	19173.9
CELE_C34H4.1	C34H4.1	2.6225	1.40385e-58	47.0524	44.1315	52.1332	48.6211	298.032	286.818	299.594	296.7
CELE_Y40D12A.2	ctsa-4.2	2.15825	2.54079e-52	347.011	262.95	337.391	318.331	1568.76	1566.13	1212.19	1300.59
CELE_F08F3.7	cyp-14A5	2.25687	3.62359e-52	192.13	168.251	199.68	133.02	806.76	767.372	832.913	901.799
CELE_K10C2.3	asp-14	1.3849	1.66011e-51	3875.94	4275.24	3936.55	4690.56	11018.4	10688	11231.6	10882.2
CELE_Y22F5A.5	lys-2	1.96512	3.58296e-51	1308.64	1071.11	1230.54	1110.95	3861.31	3868.25	5292.82	5408.67
CELE_F49F1.7	F49F1.7	3.43838	8.62284e-50	118.611	75.3913	124.923	85.3163	1347.15	1221.95	894.532	913.497
CELE_K11G12.1	nas-11	1.41676	1.38395e-49	553.845	540.611	518.382	521.989	1322.04	1297.71	1530.9	1548.37
CELE_R03D7.6	gst-5	1.73037	2.12615e-49	1146.9	1142.82	987.581	1043.06	3961.75	4002.46	3217.98	3154.17
CELE_K06G5.1	K06G5.1	1.29421	7.75844e-49	3430.9	3487.31	3491.94	3864	8318.69	9010.4	8860.33	8818.07
CELE_F35C5.9	clec-66	1.36279	3.32783e-48	469.543	560.838	505.594	617.397	1418.11	1468.72	1332.24	1322.92
CELE_F19B2.5	F19B2.5	1.34335	3.46926e-48	397.985	416.491	430.837	355.026	968.33	1059.6	1015.64	1015.59
CELE_R10H10.3	R10H10.3	1.13104	3.98768e-48	974.376	1030.65	1033.81	961.414	2205.22	2240.42	2174.71	2140.71
CELE_T26C5.1	gst-13	1.6902	5.08749e-47	521.497	564.516	576.417	559.602	2011.99	2015.3	1606.33	1537.74
CELE_M02F4.7	clec-265	2.25287	1.74208e-46	238.203	208.705	264.601	214.667	997.806	888.593	1219.62	1305.91
CELE_C49C3.9	C49C3.9	1.84961	3.62998e-45	171.545	154.46	174.105	115.59	541.479	539	575.815	559.371
CELE_C15C8.3	hrg-7	2.56116	4.97042e-45	464.642	256.514	437.723	275.214	2207.4	2206.87	2002.6	2040.75
CELE_Y58A7A.3	Y58A7A.3	1.71555	1.63418e-43	189.19	216.98	207.549	209.163	758.726	705.679	573.69	665.715
CELE_H23N18.1	ugt-13	1.10885	2.09256e-43	329.367	389.828	340.342	364.2	746.717	812.83	746.86	766.742
CELE_T10D4.13	ins-19	4.52518	6.88469e-43	18.6249	4.59703	11.8038	3.66952	209.605	187.243	247.537	235.021
CELE_C49C3.4	C49C3.4	0.83527	1.88173e-42	2045.8	2200.14	2031.23	2091.63	3912.62	3902.88	3535.63	3582.74
CELE_H23L24.5	parg-2	4.1608	3.19838e-42	10.7828	6.43585	6.88552	6.42166	124.453	130.962	142.36	145.692
CELE_K10B2.2	ctsa-4.1	1.43133	9.64129e-42	223.499	196.753	210.5	227.51	646.281	577.964	567.316	523.214
CELE_R10D12.9	swt-6	2.1581	1.1456e-41	60.776	44.1315	60.9861	44.0342	235.805	220.795	230.539	246.719
CELE_K08D8.4	K08D8.4	2.27073	4.35641e-41	40.1906	47.8091	33.444	47.7038	184.496	200.231	216.727	216.942
CELE_Y32F6A.5	Y32F6A.5	1.04684	1.05252e-40	2616.31	2702.14	2750.27	2555.82	5557.8	5688.73	5454.31	5249.15
CELE_C49C8.5	C49C8.5	1.34481	2.03182e-40	516.596	583.823	518.382	517.402	1312.21	1426.51	1297.18	1390.98
CELE_C52A10.1	cest-32	1.20426	1.24522e-39	285.255	285.016	303.947	247.693	608.072	656.974	650.182	667.842
CELE_R08E3.1	R08E3.1	0.994331	1.98655e-39	1767.4	1984.08	1820.73	1943.01	4044.72	3944.01	3387.96	3597.63
CELE_K08B4.3	ugt-19	2.06934	6.61967e-39	106.848	70.7943	93.4464	66.9687	387.55	348.51	326.154	353.063
CELE_K10D11.5	K10D11.5	1.58253	6.77099e-39	117.631	111.248	102.299	114.673	370.083	338.769	294.282	332.858
CELE_B0024.4	B0024.4	3.05928	1.47969e-37	47.0524	76.3107	52.1332	77.9773	423.576	465.402	633.184	594.464
CELE_F14F9.4	F14F9.4	1.74863	1.88853e-37	85.2824	94.6989	90.4954	87.1511	311.132	317.123	252.849	321.16
CELE_F54E2.1	F54E2.1	2.28823	2.15374e-37	453.859	298.807	481.003	284.388	1651.73	1624.58	2065.29	2068.4
CELE_C05A9.1	pgp-5	1.96746	3.43496e-37	79.4009	60.6808	103.283	74.3078	323.141	298.723	311.28	306.271
CELE_T21H3.1	T21H3.1	1.07457	3.64972e-37	13228.6	15059	13035.3	15041.4	31072.8	30752.3	28017.3	28869.3
CELE_R06B10.3	clec-150	1.21338	3.84277e-37	3147.61	2989.91	3045.37	2795.26	7622.19	7765.72	5932.38	6454.03
CELE_F35E12.6	F35E12.6	1.87411	1.02969e-36	764.601	553.483	790.852	562.354	2332.94	2316.19	2530.61	2608.62
CELE_K11D12.5	swt-7	1.02374	1.2278e-36	970.455	845.854	931.513	816.468	1805.66	1803.16	1782.69	1852.52
CELE_K08D8.6	K08D8.6	2.07913	1.82856e-36	821.456	559.919	802.655	564.189	3340.58	3262.14	2497.68	2508.66
CELE_C02A12.4	lys-7	1.49676	7.23802e-36	4122.96	4919.74	4099.84	5050.18	11597	11257.3	14296.6	14192.7
CELE_T07C4.5	ttr-15	0.903158	8.45783e-36	4716.02	4169.51	4656.58	4323.61	8061.05	7668.31	9011.19	8668.12
CELE_F35C5.8	clec-65	1.24899	9.15045e-36	1778.19	1931.67	1635.8	1998.05	4605.85	4766.58	4098.7	3985.78
CELE_T08H10.1	exc-15	0.690263	9.57858e-36	2232.05	2180.83	2133.53	2099.88	3472.67	3418	3504.82	3555.09
CELE_F08C6.6	apy-1	0.77246	1.14711e-35	1991.88	1790.08	1957.46	1703.57	3182.28	3201.53	3190.36	3136.09
CELE_B0365.6	clec-41	2.91296	1.16362e-35	1181.21	654.617	1244.31	695.374	7553.41	7351.19	6737.67	6787.95
CELE_F19C7.1	nspg-10	1.22315	1.61403e-35	3690.67	3547.99	3864.75	3647.5	8829.6	8525.52	8537.36	8543.7
CELE_R08F11.1	R08F11.1	0.779637	1.92995e-35	712.647	739.203	722.98	751.334	1237.98	1257.67	1276.99	1251.67
CELE_F53B6.9	fip-6	2.79423	9.12111e-35	28.4275	48.7285	29.5094	34.8604	237.989	251.101	246.474	248.846
CELE_B0213.17	nlp-34	3.16651	1.2459e-34	46.0721	77.2301	40.3295	66.0514	441.043	418.862	601.312	605.099
CELE_Y34B4A.6	nspg-14	1.45087	4.79614e-34	2356.54	2149.57	2283.04	2290.7	6490.11	6114.08	6149.11	6068
CELE_R07B1.10	lec-8	0.864418	6.00785e-34	3129.96	3132.42	3146.68	3253.03	5969.37	5612.96	5826.14	5644.75
CELE_F53C11.1	F53C11.1	1.3231	1.05387e-33	151.94	144.347	173.122	162.376	398.467	388.557	387.772	405.172
CELE_K07A1.6	K07A1.6	0.90312	2.82985e-33	303.88	321.792	324.603	318.331	568.771	589.87	614.061	599.782
CELE_ZC443.6	ugt-16	1.54922	3.94565e-33	159.782	201.35	144.596	210.08	495.628	510.86	546.068	545.546
CELE_Y68A4A.13	Y68A4A.13	3.28131	2.26218e-32	14.7039	38.6151	10.8201	34.8604	236.897	251.101	252.849	228.64
CELE_F52E1.7	hsp-17	1.21418	2.37848e-32	264.67	246.401	236.075	252.28	593.88	585.541	580.065	559.371
CELE_F01D5.5	F01D5.5	2.04897	3.58057e-32	164.683	182.962	124.923	202.741	779.468	737.067	655.494	625.304
CELE_Y94H6A.10	Y94H6A.10	1.30914	8.82891e-32	438.175	422.008	401.328	379.795	936.671	896.169	1127.2	1105.98
CELE_C17H12.6	C17H12.6	3.44864	1.21466e-31	19.6051	20.2269	20.6566	11.9259	246.722	195.902	154.046	192.483
CELE_Y46D2A.2	Y46D2A.2	1.95406	5.23723e-31	115.67	70.7943	105.25	70.6383	377.725	364.745	309.155	348.809
CELE_K01D12.11	cdr-4	1.73353	5.35886e-31	379.36	257.434	330.505	252.28	1027.28	1072.59	1008.21	944.337
CELE_C39E9.8	C39E9.8	1.16405	6.20551e-31	800.87	880.791	926.595	840.32	1647.36	1822.64	2067.41	2189.63
CELE_T26C12.6	clec-173	1.83741	7.83699e-31	251.926	217.899	268.535	189.898	883.178	888.593	793.605	749.727
CELE_F40F4.6	irg-7	1.39997	8.26177e-31	7630.32	7665.09	7931.14	7692.23	21329.5	20466.9	19682.9	20114
CELE_W01A11.4	lec-10	1.12146	1.44215e-30	2394.77	2223.12	2324.36	2117.31	4951.91	4783.9	4960.3	5013.07
CELE_E01G4.6	E01G4.6	2.01898	3.08267e-30	431.313	356.73	401.328	366.952	1278.37	1256.59	1934.61	1836.57
CELE_F35E12.8	cld-9	1.5227	3.23203e-30	117.631	147.105	98.3646	122.929	362.442	358.251	310.218	367.951
CELE_F56C9.7	nspg-6	1.19154	3.25372e-30	1407.65	1423.24	1392.84	1282.5	3117.87	3187.46	3121.3	3148.85
CELE_F56D5.3	F56D5.3	1.89936	6.66514e-30	38.23	51.4868	54.1005	48.6211	199.78	186.161	155.109	177.595
CELE_Y49C4A.8	ugt-29	1.33255	1.27969e-29	269.571	242.723	269.519	218.336	628.814	544.412	692.678	650.827
CELE_ZK1058.6	nit-1	1.72599	1.35267e-29	150.96	179.284	131.809	200.906	551.304	548.741	568.378	527.468
CELE_C29F3.7	C29F3.7	1.62064	6.85839e-29	1052.8	1247.63	1076.11	1275.16	4169.17	4175.63	3019.31	2942.55
CELE_K06A4.7	K06A4.7	1.25462	4.84009e-28	946.929	1138.23	1176.44	1280.66	2721.59	2769.68	2806.83	2541.63
CELE_C17H12.8	C17H12.8	1.7192	1.09632e-27	403.866	493.721	418.05	518.32	1248.89	1210.05	1827.31	1753.62
CELE_M28.10	M28.10	0.76483	1.68132e-27	1004.76	1038.93	941.349	1089.85	1744.52	1712.25	1739.13	1730.22
CELE_Y40B10A.2	comt-3	1.05271	2.53506e-27	287.215	246.401	268.535	241.271	505.453	521.683	594.938	540.229
CELE_C34H4.2	C34H4.2	1.33311	2.81745e-27	282.314	394.425	262.634	333.009	837.327	785.772	781.919	803.963
CELE_C18D11.6	C18D11.6	3.37722	4.64494e-27	8.82232	17.4687	7.86917	19.265	135.37	102.821	159.358	161.643
CELE_K10H10.2	cysl-2	1.71327	9.0718e-27	1569.39	1314.75	1504.98	1289.84	5401.69	5162.72	3987.15	4068.73
CELE_Y39D8C.1	abt-4	0.963165	1.10063e-26	666.575	675.764	629.534	680.696	1417.02	1387.55	1125.07	1243.16
CELE_C35B1.5	C35B1.5	1.2798	1.98474e-26	1346.87	997.556	1300.38	1027.47	2963.94	3073.82	2729.28	2574.59
CELE_C34B7.3	cyp-36A1	1.87883	2.45236e-26	164.683	103.893	143.612	99.077	489.078	536.836	428.143	423.25
CELE_T18H9.2	asp-2	0.917069	3.7973e-26	10567.2	9716.29	11086.7	9831.56	20034.7	19719	19223.9	18820.8
CELE_Y46C8AL.2	clec-174	5.80445	4.27322e-26	0	2.75822	1.96729	3.66952	144.103	122.303	110.489	99.9636
CELE_Y39A1A.19	fmo-3	1.20702	5.677e-26	134.295	143.427	117.054	131.185	292.573	285.735	313.405	323.287
CELE_F49F1.1	drd-50	3.48144	7.9138e-26	120.572	41.3733	118.038	42.1995	1073.13	987.085	787.231	744.41
CELE_C15B12.8	C15B12.8	2.0718	9.39795e-26	95.085	51.4868	88.5282	56.8776	323.141	334.44	286.845	279.685
CELE_F48C1.9	F48C1.9	2.40571	1.20694e-25	22.5459	29.421	17.7056	21.0997	109.169	106.068	123.237	143.565
CELE_Y47H9C.1	Y47H9C.1	2.36908	1.54407e-25	43.1313	77.2301	57.0515	76.1425	405.018	355.004	257.098	295.637
CELE_R02D3.1	aass-1	0.633722	3.05191e-25	2338.89	2505.38	2433.54	2457.66	3935.55	4049	3578.13	3544.45
CELE_Y58A7A.4	Y58A7A.4	2.72858	5.22136e-25	13.7236	21.1463	10.8201	13.7607	115.719	86.5864	91.3655	102.09
CELE_K02D7.4	dsc-4	0.945905	6.78467e-25	1538.02	1787.33	1589.57	1843.93	3599.31	3443.97	3011.87	2968.07
CELE_C40H1.8	C40H1.8	2.47433	1.13328e-24	35.2893	47.8091	27.5421	29.3562	158.295	172.091	226.289	222.259
CELE_Y22F5A.4	lys-1	2.00602	1.23996e-24	4005.33	2446.54	4058.52	2487.02	12558.8	12196.8	13714.4	13733.3
CELE_W04E12.8	clec-50	1.09861	1.25045e-24	7968.51	6628	7524.89	6515.23	16359	15979.5	14623.8	14360.7
CELE_W05B2.6	col-92	0.806588	2.69458e-24	1668.4	1448.98	1653.51	1428.36	2573.12	2627.9	2890.76	2747.94
CELE_F41F3.4	col-139	1.11889	6.04708e-24	6079.56	4650.36	5817.28	4338.29	11111.2	10991.1	11790.4	11462.8
CELE_C17F4.7	C17F4.7	1.2019	6.76514e-24	25967	24096.7	25303.3	24260.1	55246.1	54821.1	59408.8	59708
CELE_AC3.5	AC3.5	1.44027	8.19309e-24	790.088	543.369	758.391	545.841	1981.42	1911.4	1589.33	1672.8
CELE_T24D3.2	T24D3.2	1.8047	8.7341e-24	35.2893	45.9703	43.2804	33.0257	135.37	152.609	138.111	124.423
CELE_F57H12.6	F57H12.6	3.68932	1.20563e-23	59.7957	26.6628	60.0024	40.3647	367.9	340.934	839.288	858.198
CELE_C34F11.8	C34F11.8	1.2362	1.26618e-23	129.394	140.669	106.234	157.789	312.224	304.135	324.029	320.096
CELE_F25A2.1	F25A2.1	2.83538	1.53681e-23	14.7039	12.8717	16.722	20.1824	132.095	122.303	117.925	88.2657
CELE_F17C11.11	F17C11.11	1.59299	1.88986e-23	431.313	340.18	481.987	313.744	1318.76	1238.19	1070.89	1097.47
CELE_F57B1.3	col-159	1.34552	3.71573e-23	1740.94	1243.04	1821.71	1222.87	3901.71	3852.01	3861.79	3700.78
CELE_C53B7.4	asg-2	0.587054	5.82442e-23	1581.16	1684.35	1642.69	1760.45	2459.58	2363.81	2574.17	2621.39
CELE_C34G6.2	tyr-4	1.1418	9.06e-23	1126.32	935.036	1225.62	982.514	2098.23	2166.83	2560.36	2592.67
CELE_K04F1.9	K04F1.9	1.90436	2.49058e-22	60.776	41.3733	65.9043	49.5385	243.447	217.548	180.606	171.214
CELE_C12D12.1	C12D12.1	1.37039	3.4905e-22	1895.82	1637.46	1749.91	1707.24	4838.38	4742.77	4567.21	3924.1
CELE_K08D8.5	K08D8.5	2.21735	4.24034e-22	41.1708	26.6628	41.3131	26.604	141.92	125.55	202.916	158.453
CELE_Y34B4A.9	nspg-13	1.30583	6.82208e-22	2102.65	2005.23	2057.79	2020.07	5216.1	5504.73	4773.32	4742.95
CELE_Y53F4B.30	gst-27	0.891815	1.20662e-21	815.574	672.086	856.756	682.531	1450.86	1439.5	1363.05	1360.14
CELE_AC3.7	ugt-1	0.999296	1.27175e-21	293.097	232.61	257.715	231.18	479.253	476.225	528.008	542.356
CELE_K07C6.3	cyp-35B2	1.51424	1.37589e-21	157.821	168.251	152.465	170.633	536.02	485.966	435.58	397.728
CELE_T05A10.3	ttr-14	1.07693	1.73672e-21	451.899	353.052	480.019	361.448	830.777	824.736	894.532	919.878
CELE_C31A11.5	oac-6	2.3611	2.14444e-21	30.388	33.0986	59.0188	24.7693	176.854	193.737	200.792	182.912
CELE_F23B2.12	pcp-2	1.95656	2.14508e-21	414.649	332.825	413.131	333.926	1733.61	1740.39	1161.19	1164.47
CELE_Y41C4A.32	Y41C4A.32	2.96015	4.26039e-21	48.0326	19.3075	48.1987	24.7693	199.78	213.219	338.902	336.048
CELE_T20D3.2	nspg-7.1	1.31961	4.78048e-21	2859.41	2430.91	2694.21	2463.17	6743.38	6669.32	6446.58	6216.89
CELE_Y38E10A.13	nspe-1	1.09469	8.04413e-21	202.913	250.079	182.958	239.436	472.702	441.591	489.762	467.915
CELE_R08H2.1	dhs-23	1.16102	1.04679e-20	151.94	158.138	136.727	155.037	375.542	348.51	281.533	341.365
CELE_F44D12.4	gipc-2	1.19643	1.05638e-20	531.3	422.008	518.382	371.539	972.697	955.698	1132.51	1160.22
CELE_F09G8.8	clec-160	0.663142	1.26462e-20	483.267	453.267	484.938	518.32	758.726	781.442	760.671	770.996
CELE_ZK1193.2	ZK1193.2	1.07389	1.3175e-20	664.615	520.384	600.024	483.459	1241.25	1225.2	1151.63	1154.9
CELE_C09B9.6	msp-55	1.02828	1.43434e-20	305.84	236.287	286.241	240.354	528.379	547.659	516.321	584.893
CELE_Y38E10A.17	Y38E10A.17	1.11242	1.88999e-20	325.445	248.24	292.143	258.701	563.313	547.659	653.37	664.652
CELE_F32H5.1	F32H5.1	0.670628	2.10147e-20	556.786	558.999	491.823	522.907	878.812	876.688	837.163	799.709
CELE_C33F10.1	C33F10.1	1.15302	2.15999e-20	248.985	201.35	246.895	170.633	478.161	487.049	486.574	475.359
CELE_M18.1	col-129	1.22217	2.40728e-20	6158.96	4296.39	6000.24	4215.36	11949.7	11461.9	12316.3	12493.3
CELE_K10C2.1	ctsa-2	1.0001	2.5067e-20	3187.8	3598.56	3368.99	3581.45	7382.02	7187.76	6271.29	6635.88
CELE_Y54G2A.33	clec-84	0.743845	2.79369e-20	554.826	617.841	500.676	584.371	989.072	948.121	945.527	900.736
CELE_T08A9.7	spp-3	0.884599	3.06203e-20	3062.32	3156.32	3020.78	3250.28	6449.71	6329.47	5349.13	4932.25
CELE_H39E23.3	H39E23.3	5.43989	5.65676e-20	0.980257	2.75822	0.983646	6.42166	82.9685	64.9398	188.043	155.263
CELE_F29G6.3	hpo-34	0.795212	5.79653e-20	6299.13	6481.82	6439.93	6568.44	11835	11530.1	11066.9	10321.8
CELE_Y37A1A.2	Y37A1A.2	2.19637	9.13097e-20	42.1511	27.5822	50.166	28.4388	183.404	169.926	154.046	170.151
CELE_Y49F6B.10	col-71	1.76291	1.17705e-19	859.686	657.376	835.116	657.761	2254.34	2189.55	2900.32	2869.17
CELE_W10C8.5	W10C8.5	1.30647	1.43587e-19	1591.94	1115.24	1551.21	1178.83	3435.55	3521.9	3145.74	3342.4
CELE_W01F3.2	W01F3.2	0.90377	1.5204e-19	643.049	663.811	645.272	624.736	1081.87	1090.99	1297.18	1350.57
CELE_F01D4.2	ugt-44	1.06563	1.74553e-19	589.135	513.029	612.812	524.741	1115.71	1002.24	1264.24	1303.78
CELE_F39E9.1	F39E9.1	1.49095	2.35183e-19	55.8747	51.4868	60.0024	48.6211	156.112	140.703	143.423	165.897
CELE_Y71H10B.1	Y71H10B.1	0.595684	2.47387e-19	1801.71	1572.19	1851.22	1627.43	2634.25	2627.9	2577.36	2512.91
CELE_Y69H2.3	Y69H2.3	1.19788	3.712e-19	3162.31	2202.9	3058.16	2191.62	6321.98	6514.55	5720.97	5790.44
CELE_ZK896.7	clec-186	1.83883	4.02533e-19	603.839	360.407	582.319	378.878	2055.65	1939.54	1604.21	1285.7
CELE_C45B2.3	C45B2.3	5.67046	4.41771e-19	0.980257	3.67763	2.95094	5.50428	70.9599	81.1748	277.284	243.528
CELE_F10A3.17	F10A3.17	0.877306	4.86512e-19	200.953	191.237	170.171	180.724	334.058	356.087	324.029	350.936
CELE_T07A5.1	T07A5.1	1.89996	6.0902e-19	33.3288	32.1792	44.2641	34.8604	125.545	108.233	151.922	153.136
CELE_R08E5.3	rips-1	2.28598	6.90124e-19	446.017	231.69	430.837	227.51	1741.25	1772.86	1477.78	1520.72
CELE_C09F12.1	clc-1	1.33124	9.97872e-19	230.361	195.834	266.568	195.402	494.536	551.988	600.25	585.957
CELE_Y74C9A.2	nlp-40	0.714797	1.12551e-18	2437.9	2173.48	2416.82	2363.17	4037.07	3748.11	3941.47	3685.89
CELE_F14H3.10	cyp-35D1	2.11457	1.39067e-18	81.3614	40.4539	73.7735	34.8604	279.473	226.207	249.662	239.275
CELE_F56F10.3	cdo-1	0.873826	1.63048e-18	456.8	473.494	520.349	502.724	950.863	976.262	813.79	839.056
CELE_K05F1.2	msp-142	1.02615	1.96126e-18	198.012	159.057	205.582	161.459	379.909	343.099	354.838	394.537
CELE_F08F3.3	rhr-1	0.682443	2.56883e-18	3866.14	4225.59	4193.28	4033.72	7027.22	7154.2	5875.01	6133.94
CELE_F45E4.1	warf-1	3.05555	3.20627e-18	18.6249	9.19406	15.7383	12.8433	79.6935	84.4218	142.36	160.58
CELE_H25K10.1	H25K10.1	2.64994	4.08327e-18	18.6249	7.35525	8.85282	8.25642	65.5015	63.8575	72.2425	66.9969
CELE_F46F2.5	F46F2.5	1.74507	4.12602e-18	52.9339	36.7763	38.3622	34.8604	150.653	121.221	150.859	122.296
CELE_F28B4.3	F28B4.3	1.65924	4.65828e-18	3334.84	2799.59	3528.34	2804.43	10594.9	10668.5	9184.36	8928.66
CELE_C18H9.6	C18H9.6	1.65083	5.86666e-18	622.464	527.739	645.272	495.385	2015.26	2001.23	1602.08	1573.89
CELE_LLC1.2	nspg-9	0.947248	6.04904e-18	1963.46	1745.03	1978.11	1654.95	3489.05	3476.44	3470.83	3717.8
CELE_D1086.6	D1086.6	0.970161	7.66502e-18	1555.67	1183.28	1555.14	1164.16	2839.49	2719.9	2565.67	2565.02
CELE_M176.6	kin-15	1.41816	7.78088e-18	50.9734	46.8897	45.2477	44.0342	128.82	122.303	123.237	125.486
CELE_F22B7.4	fip-1	5.69145	7.79368e-18	0	3.67763	0	3.66952	65.5015	66.0221	120.05	138.248
CELE_C02C2.1	tyr-1	0.980242	8.70385e-18	447.978	407.297	439.69	455.02	826.41	768.455	942.34	914.561
CELE_ZK525.2	aqp-11	0.738503	1.24214e-17	680.299	708.862	742.653	688.035	1269.64	1243.6	1094.26	1097.47
CELE_C13D9.9	ugt-7	1.47975	1.61247e-17	76.4601	82.7466	60.9861	57.7949	222.705	187.243	162.546	203.118
CELE_C32H11.10	dod-21	9.28486	1.92894e-17	0	0	0.983646	0	191.046	203.478	159.358	164.834
CELE_R09B5.9	cnc-4	2.24445	1.93265e-17	94.1047	92.8601	71.8062	78.8947	288.207	304.135	481.262	526.404
CELE_K05G3.3	cah-3	0.746856	2.06861e-17	1097.89	1208.1	1048.57	1089.85	1955.22	1868.1	1796.5	1839.76
CELE_F01D5.1	F01D5.1	1.87741	2.6037e-17	96.0652	182.042	121.972	179.806	591.697	553.071	513.134	475.359
CELE_H20E11.1	H20E11.1	1.42027	3.75521e-17	130.374	80.9078	135.743	92.6554	292.573	320.37	293.22	267.988
CELE_E03H4.8	E03H4.8	0.901433	3.90609e-17	182.328	216.98	198.697	215.584	365.717	419.944	372.899	362.634
CELE_C31A11.7	oac-7	2.32631	3.96608e-17	19.6051	20.2269	13.771	12.8433	97.1605	64.9398	90.3031	80.8216
CELE_F22H10.3	F22H10.3	0.875513	5.42405e-17	2216.36	2067.75	2313.54	1865.03	3673.54	3684.25	4169.88	3996.42
CELE_F37C4.5	F37C4.5	0.76016	7.45592e-17	3346.6	2697.54	2996.19	2681.5	4621.13	4655.1	5281.14	5292.75
CELE_F49F1.5	F49F1.5	1.59094	1.00354e-16	147.039	216.061	126.89	216.502	598.247	598.529	466.389	467.915
CELE_C25E10.8	C25E10.8	1.39432	1.1415e-16	68.618	51.4868	65.9043	65.134	139.737	153.691	180.606	185.039
CELE_C33A12.19	C33A12.19	1.35614	1.20455e-16	226.439	178.365	188.86	198.154	555.671	524.93	469.576	476.422
CELE_F57H12.3	ora-1	3.56759	1.39454e-16	32.3485	38.6151	32.4603	36.6952	206.33	196.984	640.621	617.86
CELE_K07C11.7	K07C11.7	0.600935	1.45778e-16	1058.68	997.556	1121.36	982.514	1517.45	1493.62	1710.45	1585.59
CELE_Y73B6BL.34	bli-6	1.58134	1.61559e-16	753.818	576.468	727.898	624.736	1835.13	1632.15	2356.38	2203.45
CELE_F21H7.5	F21H7.5	1.01097	2.32901e-16	222.518	226.174	278.372	214.667	437.768	423.191	509.947	525.341
CELE_C49G7.10	C49G7.10	1.39862	2.50772e-16	65.6773	43.2121	62.9534	57.7949	143.012	167.761	150.859	142.501
CELE_E02C12.8	E02C12.8	1.47432	2.75472e-16	63.7167	45.9703	44.2641	49.5385	161.57	155.856	123.237	124.423
CELE_C32H11.4	C32H11.4	1.90811	2.91738e-16	318.584	549.805	307.881	570.61	1996.7	1933.04	1312.05	1317.61
CELE_VW02B12L.1	vha-6	0.885192	2.97437e-16	6002.12	5763.76	5901.88	6098.74	11867.8	11882.9	9918.47	10228.2
CELE_F32A5.3	ctsa-3.1	0.739822	2.97437e-16	1007.7	917.568	1021.02	927.471	1627.71	1626.74	1538.34	1674.92
CELE_F35C5.6	clec-63	1.24394	3.93545e-16	17831.9	25504.3	18492.5	28278.2	57276.7	56276.8	53128	46735.1
CELE_B0213.2	nlp-27	1.482	4.31522e-16	730.292	485.447	604.942	484.377	1481.43	1547.73	1756.13	1651.53
CELE_F53H2.2	cnc-7	2.96255	6.17722e-16	62.7365	18.3881	34.4276	23.8519	213.972	183.996	365.462	320.096
CELE_Y71F9B.1	Y71F9B.1	0.813373	8.5945e-16	211.736	227.093	226.239	217.419	389.734	384.227	393.084	383.903
CELE_T27A3.4	spch-3	1.0877	1.33962e-15	300.939	242.723	294.11	231.18	510.912	518.436	641.683	598.718
CELE_C26B9.5	C26B9.5	0.768525	1.37384e-15	988.1	1131.79	1036.76	1105.44	1776.18	1775.02	1922.93	1787.65
CELE_F47B8.11	sss-2	1.28946	1.3804e-15	138.216	87.3436	108.201	102.747	262.006	216.466	293.22	293.51
CELE_F55C5.1	ssp-35	1.22617	1.64161e-15	56.8549	62.5196	80.659	66.9687	146.287	146.115	167.858	163.77
CELE_R09H10.5	R09H10.5	1.15143	1.70388e-15	1947.77	2108.2	1997.79	2107.22	4861.3	4822.86	4259.12	4185.71
CELE_Y54G2A.39	clec-80	1.56	1.98946e-15	127.433	115.845	139.678	109.168	377.725	352.84	383.523	336.048
CELE_T25C12.3	T25C12.3	1.31042	2.20002e-15	5268.88	4553.82	5604.82	4677.72	13273.9	12737.9	11779.8	12071.1
CELE_K07C10.1	ptr-13	0.88074	2.44585e-15	409.748	352.133	444.608	349.522	696.499	652.645	742.61	770.996
CELE_F15H10.2	col-13	0.722642	2.65177e-15	397.004	444.073	444.608	412.821	655.015	687.28	730.924	729.522
CELE_C10C5.2	fbxc-58	1.6586	2.79344e-15	23.5262	35.8569	24.5912	25.6866	87.3353	88.7511	93.4903	77.6313
CELE_T16G1.6	T16G1.6	0.892191	2.8079e-15	254.867	267.547	257.715	275.214	496.72	471.896	479.138	511.516
CELE_E03E2.1	cyp-43A1	1.03187	3.02065e-15	199.973	204.108	207.549	166.046	375.542	327.946	448.328	437.075
CELE_B0491.2	sqt-1	2.07073	3.75869e-15	209.775	162.735	233.124	152.285	570.955	576.882	1002.9	1031.54
CELE_F20G2.5	F20G2.5	1.718	3.79295e-15	40.1906	58.842	34.4276	67.8861	171.396	191.572	152.984	148.882
CELE_R09E10.6	R09E10.6	1.06825	4.50315e-15	496.991	363.166	474.117	357.778	798.026	810.665	947.651	989.002
CELE_T17H7.1	idpp-1	1.14468	5.2047e-15	112.73	114.926	110.168	98.1597	218.338	235.948	243.287	265.861
CELE_Y46G5A.10	cnp-2	0.771804	5.78239e-15	237.222	262.95	257.715	252.28	386.459	419.944	458.952	459.407
CELE_C41H7.7	clec-3	2.94707	6.63638e-15	3.92103	11.0329	8.85282	10.0912	50.2178	49.7872	80.7416	81.8851
CELE_C35D10.2	gipc-1	1.12983	7.35555e-15	386.221	281.338	358.047	283.47	597.155	653.727	789.355	822.041
CELE_C32H11.9	cld-1	8.6047	7.37837e-15	0.980257	0	0	0	106.986	137.456	100.927	103.154
CELE_T16A9.5	T16A9.5	0.911178	8.71009e-15	156.841	126.878	136.727	134.855	253.272	238.113	275.159	276.495
CELE_Y43C5A.2	Y43C5A.2	0.896319	1.13017e-14	1424.31	1789.16	1526.62	1780.63	3175.73	3186.38	2694.22	3082.92
CELE_E04F6.8	E04F6.8	0.824777	1.15786e-14	588.154	525.9	572.482	513.733	948.68	934.051	1053.89	959.225
CELE_ZK1320.2	ZK1320.2	0.80414	1.19611e-14	1815.44	2121.07	1869.91	2270.52	3545.81	3647.45	3509.07	3403.02
CELE_C31B8.8	zmp-3	1.06509	1.26083e-14	159.782	120.442	113.119	125.681	248.906	281.406	286.845	267.988
CELE_R09B5.3	cnc-2	3.67161	1.288e-14	10.7828	10.1135	6.88552	7.33904	73.1433	64.9398	155.109	154.199
CELE_C10G11.8	C10G11.8	1.16305	1.30475e-14	279.373	202.269	257.715	179.806	509.82	441.591	563.066	541.292
CELE_F30B5.1	dpy-13	1.67046	1.55215e-14	913.6	779.657	903.971	791.699	2181.2	2188.47	3183.98	3232.87
CELE_Y55B1AR.1	lec-6	1.48368	1.56451e-14	6662.81	5026.4	6559.94	5016.23	16268.4	16155.9	16839.9	15798.5
CELE_F38A3.1	col-81	1.16689	1.60416e-14	4347.44	2913.6	4438.21	2929.19	8197.51	7800.35	8423.69	8420.34
CELE_F42A10.3	anmt-2	0.811098	1.8027e-14	609.72	505.674	597.073	490.798	895.187	909.157	1039.02	1019.84
CELE_W09D12.1	zmp-4	0.717198	1.82157e-14	543.063	510.271	563.629	532.998	834.052	792.266	945.527	961.352
CELE_C27D8.1	C27D8.1	1.15036	2.10543e-14	70.5785	71.7137	84.5936	59.6297	147.378	142.868	172.107	172.278
CELE_Y69H2.14	col-42	2.055	2.12487e-14	9667.3	4236.62	9496.12	4144.72	27733.3	27176.2	29640.7	29907.2
CELE_F53B6.4	F53B6.4	1.00876	2.14986e-14	223.499	193.995	245.912	167.881	391.917	401.545	428.143	448.773
CELE_M03A8.1	dhs-28	0.649725	2.43132e-14	2975.08	3065.3	2806.34	3065.88	4795.8	4689.74	4564.03	4640.86
CELE_ZK287.9	ZK287.9	1.38176	2.58631e-14	86.2627	77.2301	61.9697	55.0428	213.972	179.667	180.606	156.326
CELE_C29F9.4	pals-24	0.934775	2.75647e-14	157.821	214.222	157.383	209.163	356.983	347.428	350.589	359.444
CELE_H20E11.3	H20E11.3	1.36775	2.90657e-14	69.5983	51.4868	63.937	62.3818	156.112	188.325	150.859	142.501
CELE_F23F12.3	F23F12.3	1.29378	3.46514e-14	66.6575	58.842	55.0842	55.9602	148.47	166.679	124.3	140.374
CELE_T21G5.4	smz-2	1.07959	3.7387e-14	105.868	99.2959	122.956	96.3249	200.871	217.548	225.227	252.036
CELE_F32A11.3	spe-18	1.04179	3.86911e-14	243.104	178.365	198.697	158.707	379.909	359.334	430.268	431.758
CELE_Y59E9AL.3	nsph-4.2	1.28079	4.154e-14	114.69	86.4242	130.825	77.9773	229.255	239.195	264.535	260.543
CELE_ZK938.1	ZK938.1	1.00297	4.20542e-14	197.032	160.896	210.5	155.037	338.424	327.946	394.147	387.093
CELE_C14F11.4	C14F11.4	1.29734	4.62386e-14	461.701	275.822	439.69	276.131	919.204	890.758	887.095	872.023
CELE_F08C6.1	adt-2	0.75656	5.49553e-14	542.082	474.414	586.253	459.607	889.729	811.748	887.095	893.292
CELE_F55C10.3	col-155	0.907093	5.69279e-14	700.884	585.662	658.059	563.271	1078.59	1067.18	1286.55	1268.69
CELE_C10H11.6	ugt-26	1.9112	5.89243e-14	175.466	91.9406	179.024	93.5728	402.834	426.438	568.378	630.621
CELE_Y69E1A.1	Y69E1A.1	0.912328	6.38396e-14	225.459	162.735	203.615	166.046	348.25	359.334	362.275	354.126
CELE_ZK970.7	srlf-34	3.41846	6.78363e-14	28.4275	45.9703	22.6239	61.4645	279.473	277.077	572.628	567.878
CELE_F35C5.5	clec-62	1.17215	6.79138e-14	737.154	1027.9	775.113	1255.89	2210.68	2179.81	2052.54	2114.12
CELE_F35E12.10	F35E12.10	1.12133	7.12649e-14	614.621	466.139	616.746	409.151	1126.63	1090.99	1192	1170.85
CELE_ZK484.5	msrp-2	1.11988	7.42231e-14	382.3	283.177	428.87	300.901	676.849	686.197	843.537	823.105
CELE_K10D11.6	K10D11.6	1.34314	8.40112e-14	65.6773	101.135	79.6753	92.6554	230.347	260.842	185.918	185.039
CELE_Y38C1AA.7	Y38C1AA.7	0.987502	9.67087e-14	385.241	287.774	401.328	276.131	677.94	639.657	708.614	648.7
CELE_F46G10.4	F46G10.4	1.0825	1.03952e-13	120.572	120.442	138.694	111.92	290.39	288.982	225.227	236.084
CELE_K02A4.1	bcat-1	0.659257	1.05039e-13	4273.92	4900.44	4226.73	4908.9	7566.51	7912.92	6616.56	6823.05
CELE_Y45G5AM.3	Y45G5AM.3	0.930222	1.2631e-13	144.098	148.024	163.285	129.351	274.015	274.912	269.847	294.574
CELE_ZK1248.6	msp-64	0.994944	1.43607e-13	385.241	273.064	359.031	250.445	640.823	632.081	622.56	628.495
CELE_C01B10.6	C01B10.6	0.779704	1.63014e-13	2196.76	2823.5	2234.84	2886.08	4311.09	4231.91	4505.59	4364.37
CELE_T06E4.6	col-146	0.615741	1.80352e-13	411.708	427.524	380.671	382.547	604.797	619.093	616.186	615.733
CELE_Y71F9AM.9	Y71F9AM.9	1.58044	1.8647e-13	48.0326	63.439	52.1332	55.9602	177.946	189.408	147.672	142.501
CELE_C55A6.4	C55A6.4	1.15422	1.98749e-13	105.868	102.054	141.645	86.2337	228.164	246.771	256.036	237.148
CELE_F55G11.5	dod-22	1.35553	2.1997e-13	98.0257	157.219	93.4464	157.789	337.333	320.37	321.904	319.033
CELE_C09G5.6	bli-1	2.14577	2.22648e-13	147.039	104.812	149.514	81.6468	409.384	356.087	704.364	665.715
CELE_F55B11.4	F55B11.4	0.654244	3.72402e-13	426.412	444.993	389.524	488.046	687.766	665.633	668.243	732.712
CELE_F37B1.2	gst-12	1.40801	4.23614e-13	56.8549	58.842	55.0842	66.9687	144.103	139.621	169.982	177.595
CELE_ZK1290.3	rol-8	1.89368	4.51888e-13	198.992	153.541	208.533	154.12	496.72	451.332	873.284	834.802
CELE_C03G6.14	cyp-35A1	1.50783	4.99607e-13	50.9734	33.0986	34.4276	37.6126	129.911	116.892	103.052	93.5829
CELE_T28C12.4	cest-24	0.790836	5.2471e-13	515.615	620.599	513.463	620.149	930.121	886.429	1012.46	1099.6
CELE_W09C3.6	gsp-3	0.870832	5.29513e-13	259.768	203.189	225.255	199.071	370.083	387.474	398.396	464.724
CELE_F32A5.2	skpo-3	0.660053	5.43455e-13	574.431	475.333	577.4	552.263	860.253	837.724	921.092	823.105
CELE_T03F1.5	gsp-4	0.834514	5.9531e-13	244.084	193.995	231.157	190.815	344.974	365.828	402.646	417.933
CELE_T28H10.2	T28H10.2	1.2887	6.0486e-13	82.3416	68.0361	73.7735	87.1511	207.421	211.054	164.67	177.595
CELE_C35B8.1	col-175	1.57683	6.10619e-13	385.241	317.195	396.409	326.587	890.82	913.487	1192	1254.86
CELE_ZK265.2	col-63	1.94711	6.31624e-13	317.603	257.434	331.489	255.032	853.703	865.864	1352.42	1405.87
CELE_F08B4.8	F08B4.8	1.11907	6.31624e-13	171.545	125.959	188.86	142.194	277.29	326.864	377.148	381.776
CELE_F59B1.8	F59B1.8	1.15304	7.44503e-13	269.571	185.72	236.075	180.724	537.112	509.778	441.954	448.773
CELE_F18G5.2	pes-8	1.14946	7.55459e-13	140.177	114.006	149.514	145.863	268.556	258.677	343.152	347.746
CELE_C49G7.12	C49G7.12	2.42289	8.12151e-13	9.80257	7.35525	6.88552	11.0086	56.768	46.5402	42.4956	42.5377
CELE_R186.6	mpst-7	1.63334	8.57835e-13	24.5064	26.6628	32.4603	26.604	75.3267	93.0804	90.3031	82.9485
CELE_F54C9.4	col-38	1.59453	8.65209e-13	650.891	476.253	630.517	506.394	1420.29	1372.39	2081.22	1962.05
CELE_Y46C8AL.1	clec-73	1.03923	8.67799e-13	106.848	91.0212	103.283	77.9773	180.129	177.502	200.792	219.069
CELE_T21B6.2	pho-7	1.34807	9.13069e-13	85.2824	65.2779	80.659	53.208	183.404	189.408	174.232	175.468
CELE_Y54G2A.45	Y54G2A.45	1.31878	1.01452e-12	532.28	467.058	473.134	454.103	1295.84	1366.98	1058.14	1084.71
CELE_K10D11.1	dod-17	1.43761	1.08421e-12	93.1245	177.445	103.283	160.542	353.708	378.816	328.278	389.22
CELE_C04G2.8	spch-1	1.06828	1.13738e-12	301.919	227.093	307.881	245.858	512.003	506.531	667.181	582.767
CELE_W05B2.1	col-94	0.74057	1.43485e-12	1209.64	1299.12	1170.54	1358.64	1971.59	1789.09	2394.63	2263.01
CELE_K08F4.7	gst-4	2.48454	1.63843e-12	143.118	57.9226	166.236	55.9602	539.296	481.637	666.118	678.476
CELE_F53C3.12	bcmo-2	0.942021	1.71204e-12	210.755	294.21	207.549	267.875	462.877	452.414	513.134	457.28
CELE_F27C1.8	dpy-5	1.59839	1.80093e-12	769.502	657.376	784.95	598.132	1767.45	1723.07	2456.24	2560.77
CELE_F14F7.1	col-98	2.19227	1.81734e-12	6305.02	2322.42	6037.62	2259.51	18957.2	18940.8	19942.1	19505.7
CELE_B0222.5	B0222.5	1.10391	1.90806e-12	169.585	123.2	158.367	124.764	277.29	362.581	290.032	306.271
CELE_F58E6.5	F58E6.5	1.16154	2.19164e-12	83.3219	79.9884	104.266	76.1425	159.387	188.325	193.355	226.513
CELE_B0213.6	nlp-31	1.4355	2.39336e-12	350.932	455.106	325.587	421.995	922.479	922.145	1178.19	1180.42
CELE_F32B6.6	msp-77	1.01885	2.5539e-12	432.294	293.291	404.279	293.562	680.124	666.715	791.48	743.346
CELE_C05D12.3	C05D12.3	1.20906	2.74713e-12	813.614	610.486	867.576	543.089	1810.02	1772.86	1479.91	1488.82
CELE_C32H11.1	irg-6	2.77582	2.94109e-12	23.5262	36.7763	25.5748	23.8519	299.123	257.595	99.8646	95.7098
CELE_F49F1.6	mul-1	1.56521	2.94109e-12	77.4403	144.347	75.7408	133.02	376.634	340.934	281.533	277.559
CELE_F53C11.3	decr-1.1	0.623636	3.05261e-12	1793.87	1738.6	1654.49	1664.13	2553.47	2567.29	2711.22	2723.48
CELE_F26B1.8	F26B1.8	1.13236	3.15315e-12	208.795	138.83	178.04	133.02	317.682	321.452	396.271	406.235
CELE_F11A5.9	F11A5.9	0.835248	3.24209e-12	655.792	495.56	646.256	474.285	975.972	986.003	1040.08	1048.55
CELE_F21F8.11	slc-17.5	0.873871	3.48525e-12	116.651	130.556	132.792	122.929	215.063	211.054	233.726	261.607
CELE_C52E4.2	mif-2	0.635987	4.1913e-12	609.72	574.629	677.732	637.579	913.746	1007.65	1028.39	933.703
CELE_F55H12.4	F55H12.4	1.71162	4.40212e-12	724.41	542.45	660.027	537.585	1435.57	1375.64	2598.6	2660.73
CELE_T19D12.4	T19D12.4	1.14419	4.4409e-12	645.99	1060.08	732.816	1085.26	1935.57	1989.32	1955.86	1911.01
CELE_W02G9.4	W02G9.4	1.04304	4.4409e-12	391.123	536.933	332.472	488.964	950.863	967.603	836.101	852.881
CELE_Y39G10AR.6	ugt-31	1.64734	4.86024e-12	30.388	22.9852	38.3622	23.8519	76.4184	79.0101	98.8022	106.344
CELE_Y37H2A.13	Y37H2A.13	4.20821	5.12738e-12	1.96051	0.919406	1.96729	3.66952	37.1175	29.2229	38.246	53.1721
CELE_Y41E3.2	dpy-4	1.65867	5.96495e-12	1030.25	773.221	1048.57	826.559	2424.65	2338.92	3394.33	3455.12
CELE_T27E7.1	T27E7.1	0.907888	6.34459e-12	184.288	159.057	211.484	139.442	329.691	314.958	331.466	324.35
CELE_C23H3.2	C23H3.2	0.622761	6.34459e-12	502.872	532.336	603.959	523.824	816.585	789.019	850.974	873.086
CELE_C04C11.25	C04C11.25	3.61769	6.5593e-12	0.980257	2.75822	3.93458	3.66952	36.0258	33.5522	29.7469	40.4108
CELE_F59E12.12	bli-2	1.88223	6.57382e-12	103.907	79.9884	118.038	73.3904	267.464	277.077	412.207	425.377
CELE_T13B5.3	pho-14	0.898226	6.94299e-12	1054.76	887.227	1054.47	864.172	1546.93	1556.39	2120.53	1969.5
CELE_T13F2.11	msp-78	1.05066	6.98704e-12	221.538	165.493	205.582	159.624	358.075	377.733	406.895	413.679
CELE_C49G7.7	C49G7.7	2.64514	8.23704e-12	4.90129	5.51644	6.88552	10.0912	48.0344	36.7992	44.6204	42.5377
CELE_B0261.6	B0261.6	0.989407	8.27088e-12	103.907	82.7466	89.5118	71.5556	164.845	180.749	165.733	177.595
CELE_K09D9.1	K09D9.1	1.49699	8.49653e-12	46.0721	38.6151	33.444	30.2735	116.811	108.233	113.676	79.7582
CELE_C27B7.9	C27B7.9	1.14355	8.6418e-12	288.196	270.305	296.077	278.884	537.112	465.402	770.232	730.585
CELE_Y58A7A.1	Y58A7A.1	0.862606	8.69666e-12	139.197	147.105	151.482	161.459	289.298	266.253	277.284	257.353
CELE_R13A5.10	R13A5.10	0.963993	8.81638e-12	81.3614	95.6183	88.5282	104.581	167.029	168.844	199.729	187.166
CELE_F56B3.1	col-103	2.13796	9.20636e-12	8370.42	2909.92	7706.87	2996.16	23057.6	23147.8	25169.1	25380.1
CELE_F56A6.1	sago-2	1.42328	1.057e-11	145.078	96.5377	160.334	84.399	370.083	356.087	302.781	273.305
CELE_F17E9.11	lys-10	2.1952	1.06833e-11	14.7039	11.0329	12.7874	14.6781	42.576	48.7049	66.9305	85.0754
CELE_B0205.13	B0205.13	2.33474	1.15468e-11	13.7236	11.0329	13.771	10.0912	48.0344	47.6225	89.2407	59.5528
CELE_Y60A3A.18	skr-4	0.626947	1.29577e-11	275.452	288.694	285.257	273.379	397.376	413.45	479.138	443.456
CELE_F22E10.2	pgp-13	1.01128	1.50082e-11	64.697	68.9555	77.708	69.7209	137.553	142.868	132.799	153.136
CELE_F28A10.6	acdh-9	0.863547	1.52656e-11	2222.24	1654.93	2087.3	1499	3287.08	3189.63	3449.58	3650.8
CELE_T12B3.2	T12B3.2	1.21226	1.53468e-11	141.157	91.9406	157.383	104.581	296.94	287.9	279.408	280.749
CELE_F49C12.15	F49C12.15	0.853068	1.53468e-11	321.524	262.95	327.554	262.371	459.602	497.872	590.689	571.069
CELE_T19C9.8	T19C9.8	2.02116	1.57099e-11	25.4867	38.6151	27.5421	31.1909	86.2436	87.6688	156.171	169.087
CELE_H06A10.1	H06A10.1	1.50321	1.59821e-11	51.9536	32.1792	45.2477	35.7778	132.095	124.468	95.6151	114.852
CELE_T05A7.6	T05A7.6	1.04094	1.60056e-11	99.9863	79.069	101.316	77.9773	168.12	175.338	184.856	207.371
CELE_C05D2.8	C05D2.8	0.766558	1.60591e-11	704.805	521.303	670.847	555.015	1089.51	957.862	1097.45	1024.1
CELE_R148.7	R148.7	1.27834	1.61357e-11	48.0326	34.9374	50.166	42.1995	98.2522	89.8334	111.551	124.423
CELE_Y57A10A.11	rol-1	1.57895	1.63536e-11	479.346	344.777	462.314	386.217	1112.43	1041.2	1357.73	1484.57
CELE_F11G11.12	col-73	1.68732	1.91905e-11	1325.31	1013.19	1286.61	957.745	2970.49	2959.09	4420.6	4407.97
CELE_T25C8.2	act-5	1.02943	1.92829e-11	11746.4	11101.8	11909	11356.2	24705	24349.2	23047.5	22026
CELE_F27C1.1	F27C1.1	1.04365	2.01621e-11	287.215	257.434	308.865	211.915	477.069	456.743	624.685	635.939
CELE_T01B7.7	rol-6	1.54476	2.08749e-11	165.664	135.153	141.645	126.598	337.333	346.346	482.325	493.437
CELE_F09A5.1	spin-3	1.11857	2.13195e-11	56.8549	68.0361	66.8879	85.3163	155.02	126.633	150.859	170.151
CELE_ZC250.4	ZC250.4	1.01605	2.2088e-11	169.585	205.947	152.465	212.832	423.576	408.039	322.966	345.619
CELE_F36D3.4	F36D3.4	1.04479	2.29431e-11	82.3416	60.6808	85.5772	62.3818	135.37	161.267	154.046	147.819
CELE_R13H9.4	msp-53	0.956676	2.29972e-11	546.003	404.539	526.251	355.943	812.218	884.264	906.218	951.781
CELE_ZK6.7	lipl-5	0.909125	2.34971e-11	8123.39	5849.26	8017.7	5489.6	13498.8	13459.9	12417.2	12226.4
CELE_ZK354.4	msp-113	0.96535	2.43521e-11	323.485	229.852	314.767	210.08	556.763	501.119	524.82	520.023
CELE_Y105C5B.15	Y105C5B.15	2.10585	3.05055e-11	1350.79	515.787	1181.36	442.177	4195.37	4102.03	3280.66	3442.36
CELE_W03D8.9	W03D8.9	0.912326	3.32853e-11	290.156	202.269	310.832	236.684	445.41	476.225	516.321	516.833
CELE_R05F9.8	msp-33	0.947555	3.55183e-11	581.293	392.587	584.286	411.904	926.846	892.922	981.648	995.382
CELE_T16G12.1	T16G12.1	0.83997	3.69524e-11	974.376	1001.23	1160.7	966.919	2011.99	2004.48	1665.83	1662.16
CELE_C01B12.1	sqt-2	1.91082	3.81712e-11	194.091	159.057	209.517	158.707	448.685	466.484	912.593	883.721
CELE_F22D6.10	col-60	1.02363	3.90182e-11	340.149	312.598	335.423	281.636	660.473	627.752	618.311	674.223
CELE_R193.2	R193.2	1.29447	3.97057e-11	224.479	239.965	292.143	226.593	467.244	504.366	737.298	701.872
CELE_M88.1	ugt-62	1.38178	4.07205e-11	938.106	581.065	947.251	521.989	1708.5	1644.06	2190.65	2241.74
CELE_C05B5.2	C05B5.2	1.15897	4.60621e-11	116.651	75.3913	88.5282	84.399	163.754	194.819	234.788	220.133
CELE_F37B1.1	gst-24	1.03465	4.60621e-11	82.3416	88.263	74.7571	99.9944	176.854	198.066	176.357	157.389
CELE_Y53F4B.33	gst-39	0.872477	4.76807e-11	159.782	169.171	154.432	177.972	290.39	258.677	327.216	334.984
CELE_K07F5.2	msp-10	1.0642	4.7857e-11	157.821	109.409	127.874	110.086	249.997	245.689	294.282	264.797
CELE_F43D2.6	F43D2.6	0.73581	5.13675e-11	333.288	298.807	309.849	301.818	455.235	495.707	542.881	576.386
CELE_K09H11.1	acds-10	0.625703	5.14141e-11	568.549	487.285	569.531	498.137	818.769	799.842	842.475	813.534
CELE_ZK896.6	clec-187	1.31524	5.63107e-11	225.459	158.138	231.157	136.69	538.204	548.741	383.523	397.728
CELE_Y38H8A.3	ttbk-8.1	0.941979	5.84842e-11	100.967	102.054	83.6099	102.747	163.754	185.078	189.105	210.562
CELE_Y59E9AL.6	cylc-1	1.02334	5.91285e-11	135.276	103.893	133.776	118.342	204.146	242.442	264.535	286.066
CELE_F54C9.3	F54C9.3	0.588715	6.55727e-11	503.852	601.292	541.989	634.827	828.594	834.477	879.659	891.165
CELE_F48C1.1	aman-3	0.912163	6.62178e-11	87.2429	103.893	91.4791	104.581	165.937	192.655	189.105	181.849
CELE_T22B3.2	alg-3	1.11586	6.64174e-11	151.94	111.248	125.907	98.1597	247.814	222.96	275.159	308.398
CELE_F01D5.3	F01D5.3	2.73245	6.90432e-11	60.776	42.2927	59.0188	39.4473	417.026	406.956	283.658	230.767
CELE_C52D10.13	col-138	1.63669	7.4126e-11	867.528	602.211	786.917	599.967	1887.53	1891.91	2562.48	2539.5
CELE_Y57G11A.2	Y57G11A.2	0.86253	7.5128e-11	291.136	245.482	292.143	236.684	468.336	439.426	534.382	493.437
CELE_F07G6.10	F07G6.10	1.64619	7.61795e-11	80.3811	43.2121	66.8879	35.7778	177.946	175.338	178.481	174.405
CELE_F25D1.5	F25D1.5	1.09088	7.90873e-11	125.473	82.7466	123.939	111.92	269.648	252.183	213.54	209.498
CELE_R11G11.7	srlf-35	1.65369	8.06847e-11	25.4867	19.3075	25.5748	17.4302	77.5101	68.1868	75.4297	54.2356
CELE_F33H12.7	F33H12.7	2.39694	8.09291e-11	15.6841	17.4687	28.5257	22.9345	70.9599	63.8575	154.046	156.326
CELE_Y69A2AL.2	Y69A2AL.2	0.992607	8.10317e-11	400.925	616.002	466.248	647.67	1180.12	1072.59	1034.77	954.971
CELE_Y27F2A.3	sri-40	0.905109	8.76438e-11	769.502	511.19	692.487	521.989	1185.58	1273.9	1096.39	1114.49
CELE_C35B1.4	C35B1.4	1.08806	9.2106e-11	636.187	387.07	562.646	406.399	980.339	955.698	1214.31	1082.58
CELE_Y51H7C.13	Y51H7C.13	1.60572	9.35529e-11	380.34	240.884	362.965	291.727	777.284	753.302	1120.82	1230.4
CELE_K09E10.2	oac-58	1.93651	1.18296e-10	18.6249	10.1135	27.5421	11.9259	76.4184	62.7752	55.2443	64.87
CELE_T26H5.10	T26H5.10	2.30185	1.18442e-10	9.80257	7.35525	6.88552	8.25642	41.4843	45.4579	41.4332	30.8398
CELE_K10D11.3	K10D11.3	1.5231	1.24377e-10	44.1116	60.6808	48.1987	55.0428	168.12	195.902	134.923	99.9636
CELE_C49C3.1	snf-9	0.912034	1.3477e-10	362.695	256.514	368.867	279.801	647.373	636.41	573.69	526.404
CELE_C39H7.1	ttbk-8.2	1.03822	1.35094e-10	224.479	172.848	207.549	133.02	364.625	337.687	414.332	396.664
CELE_Y43F8C.13	Y43F8C.13	0.633755	1.36024e-10	678.338	513.948	662.978	558.684	941.038	951.368	948.714	901.799
CELE_K08D12.6	epic-2	1.66804	1.36532e-10	6691.24	2974.28	6332.71	3018.18	14205.1	13915.5	16855.9	15451.8
CELE_C45B2.1	C45B2.1	2.3541	1.49373e-10	685.2	235.368	650.19	205.493	1886.44	1920.05	2590.11	2682
CELE_C37A5.2	fipr-22	1.80051	1.6129e-10	53.9142	84.5854	61.9697	57.7949	152.837	176.42	295.344	275.432
CELE_F08A8.1	acox-1.1	0.761897	1.72478e-10	856.745	759.43	904.954	786.195	1424.66	1417.85	1361.98	1402.68
CELE_ZK354.1	msp-65	0.901804	1.92855e-10	344.07	243.643	310.832	226.593	543.662	485.966	576.878	493.437
CELE_F56D6.2	clec-67	1.50974	1.95385e-10	373.478	694.152	329.521	709.135	1659.37	1607.26	1355.61	1378.22
CELE_F57B1.4	col-160	1.54516	1.97711e-10	10253.5	4786.43	10080.4	5083.2	20701.7	20201.7	23806	23433
CELE_ZK1251.6	msp-76	1.00554	1.99619e-10	636.187	451.429	645.272	455.02	1015.27	966.521	1193.06	1215.51
CELE_Y1H11.2	gst-35	1.1913	2.06e-10	42.1511	57.9226	42.2968	44.0342	94.9772	98.4921	112.613	120.169
CELE_F54F7.2	F54F7.2	1.67628	2.10395e-10	263.689	113.087	267.552	135.772	685.582	614.764	605.562	584.893
CELE_C17H12.3	C17H12.3	0.950294	2.11685e-10	62.7365	69.8749	86.5609	69.7209	138.645	135.291	138.111	145.692
CELE_R13H9.2	msp-57	1.0325	2.31882e-10	761.66	549.805	715.111	485.294	1205.23	1134.28	1477.78	1318.67
CELE_K07F5.5	nspd-2	0.967567	2.61806e-10	272.512	180.204	271.486	183.476	403.926	444.838	456.828	466.851
CELE_F53B7.7	F53B7.7	1.79761	2.64859e-10	28.4275	40.4539	24.5912	44.9516	85.1519	101.739	141.298	154.199
CELE_K08E7.9	pgp-1	1.12203	2.65093e-10	480.326	577.387	488.872	621.066	995.623	932.969	1398.1	1392.05
CELE_D2062.6	msrp-6	1.36831	2.67994e-10	49.0129	23.9046	36.3949	34.8604	99.3439	95.2451	93.4903	82.9485
CELE_Y106G6G.4	Y106G6G.4	0.86575	2.96186e-10	133.315	119.523	140.661	145.863	223.797	215.384	279.408	263.734
CELE_C37H5.9	nas-9	0.643776	3.1726e-10	370.537	471.656	359.031	413.738	608.072	629.916	606.624	680.603
CELE_ZK546.6	msp-152	0.872914	3.63901e-10	592.076	426.605	554.776	394.473	880.995	861.535	942.34	916.687
CELE_C17C3.15	C17C3.15	1.51333	3.88284e-10	65.6773	41.3733	52.1332	30.2735	125.545	125.55	137.048	151.009
CELE_T13F2.9	T13F2.9	1.07112	4.00441e-10	236.242	161.816	252.797	163.294	364.625	423.191	502.51	417.933
CELE_K07C6.5	cyp-35A5	1.42976	4.15574e-10	350.932	227.093	384.606	178.889	791.476	862.617	693.74	725.268
CELE_F13A7.1	F13A7.1	0.95942	4.40701e-10	123.512	100.215	154.432	117.425	217.247	216.466	275.159	253.099
CELE_F45D3.3	F45D3.3	0.599713	4.65658e-10	662.654	713.459	648.223	714.639	1140.82	1144.02	935.965	931.576
CELE_H17B01.2	H17B01.2	2.30513	4.69559e-10	18.6249	9.19406	12.7874	11.0086	49.1261	44.3755	71.1801	89.3292
CELE_Y41G9A.10	Y41G9A.10	1.44474	4.72166e-10	76.4601	85.5048	74.7571	86.2337	179.037	169.926	268.785	261.607
CELE_T27C10.7	nspd-10	1.20992	4.94897e-10	88.2232	74.4719	104.266	58.7123	157.204	190.49	189.105	214.815
CELE_ZK757.3	alg-4	0.985542	5.56204e-10	176.446	136.072	171.154	126.598	269.648	260.842	332.528	343.492
CELE_T25G12.6	T25G12.6	1.19281	5.76176e-10	154.881	94.6989	157.383	109.168	319.866	324.699	263.473	270.114
CELE_B0218.8	clec-52	1.19752	5.77331e-10	284.275	397.184	276.405	420.16	934.488	953.533	644.87	629.558
CELE_Y46C8AL.8	clec-74	2.4247	6.1915e-10	16.6644	27.5822	15.7383	31.1909	162.662	176.42	78.6168	73.3775
CELE_K09H9.3	col-49	1.56961	6.21492e-10	350.932	254.676	372.802	266.958	777.284	784.689	1036.89	1096.41
CELE_E03H12.5	E03H12.5	1.07308	6.22975e-10	105.868	83.666	118.038	71.5556	186.679	174.255	222.039	212.689
CELE_C39D10.8	C39D10.8	1.04292	6.81311e-10	269.571	182.962	255.748	189.898	430.126	517.354	458.952	442.392
CELE_W02B12.1	W02B12.1	0.739716	7.1021e-10	402.886	545.208	394.442	509.146	778.376	834.477	733.049	748.664
CELE_T04F8.8	T04F8.8	1.37652	7.55065e-10	2375.16	1289.01	2299.76	1293.51	4329.65	4112.86	5231.21	5167.27
CELE_F21C10.11	F21C10.11	1.7202	7.55202e-10	11.7631	30.3404	17.7056	22.9345	65.5015	74.6808	78.6168	55.299
CELE_C08B11.4	nrf-6	0.78642	7.74181e-10	1503.71	1139.14	1559.08	1092.6	2358.05	2285.88	2170.46	2315.11
CELE_ZK520.5	cyn-2	0.796267	7.83701e-10	200.953	159.057	192.795	160.542	262.006	308.464	331.466	334.984
CELE_T28H11.1	ssq-4	0.918386	8.9192e-10	258.788	200.431	265.584	187.146	442.135	404.792	448.328	426.44
CELE_F01D5.2	F01D5.2	1.87494	9.2844e-10	24.5064	22.0658	27.5421	17.4302	117.903	88.7511	67.9929	60.6162
CELE_F08H9.2	F08H9.2	1.15824	1.01537e-09	148.999	115.845	142.629	75.2252	253.272	263.006	304.906	254.163
CELE_Y75B8A.27	pqn-92	0.678723	1.02368e-09	323.485	403.619	319.685	386.217	548.029	535.753	571.566	640.192
CELE_K06A5.2	K06A5.2	0.920978	1.09496e-09	271.531	198.592	291.159	185.311	435.585	419.944	452.578	481.739
CELE_C04F12.7	C04F12.7	1.049	1.22022e-09	321.524	202.269	310.832	226.593	516.37	470.814	584.314	622.114
CELE_R11H6.1	pes-9	0.669157	1.28268e-09	4472.91	3409.16	4220.83	3303.49	5997.75	6222.32	6042.87	6232.84
CELE_ZK1193.1	col-19	1.54081	1.32346e-09	16910.4	8141.34	16815.4	7941.76	33833.7	33223.2	39288.2	38575.3
CELE_K08F4.8	msp-38	1.0161	1.37848e-09	230.361	163.654	203.615	187.146	383.184	395.051	434.517	373.268
CELE_B0205.10	B0205.10	1.01183	1.42325e-09	114.69	91.0212	110.168	89.9032	185.588	172.091	199.729	259.48
CELE_T24B8.5	sysm-1	2.05064	1.44371e-09	215.657	130.556	245.912	116.507	973.789	974.097	475.951	510.452
CELE_Y53F4B.29	gst-26	1.27344	1.50035e-09	432.294	239.046	393.458	233.015	841.694	811.748	728.799	752.917
CELE_F41E7.4	fip-5	1.34776	1.51006e-09	115.67	140.669	114.103	116.507	236.897	252.183	362.275	388.157
CELE_T23G11.1	T23G11.1	0.836027	1.53844e-09	163.703	132.395	151.482	111.92	253.272	216.466	252.849	274.368
CELE_F19C7.7	col-110	1.5753	1.70373e-09	52.9339	44.1315	51.1496	32.1083	118.994	90.9157	156.171	170.151
CELE_F52E1.8	pho-6	2.22116	1.83613e-09	20.5854	35.8569	24.5912	44.9516	96.0688	81.1748	205.041	206.308
CELE_F08D12.2	F08D12.2	0.586795	2.10974e-09	251.926	263.87	265.584	223.841	379.909	373.404	403.708	351.999
CELE_T10E9.4	T10E9.4	0.937185	2.18861e-09	282.314	193.075	300.996	215.584	423.576	434.014	506.76	532.785
CELE_R08F11.4	R08F11.4	1.2274	2.28761e-09	37.2498	37.6957	40.3295	32.1083	70.9599	76.8455	101.989	94.6464
CELE_W04B5.3	W04B5.3	0.695041	2.32846e-09	788.127	741.042	782.982	773.351	1260.9	1246.84	1308.86	1178.29
CELE_ZK6.11	irg-8	2.44802	2.42725e-09	794.989	224.335	838.067	250.445	2025.09	2073.74	3625.94	3774.16
CELE_Y59E9AL.2	nsph-4.1	1.01565	2.42725e-09	73.5193	49.6479	64.9206	66.9687	138.645	120.139	122.175	133.994
CELE_F16B4.4	F16B4.4	1.18924	2.56715e-09	900.857	612.325	882.331	592.627	1509.81	1449.24	1970.73	1882.29
CELE_K05F1.3	acdh-8	0.9645	2.5975e-09	129.394	78.1495	118.038	88.9859	192.138	199.149	208.228	207.371
CELE_C33F10.9	msp-40	0.956006	2.65244e-09	570.51	375.118	571.498	397.226	886.453	874.523	989.085	961.352
CELE_Y25C1A.1	clec-123	0.873039	2.9434e-09	110.769	89.1824	78.6917	94.4901	163.754	152.609	176.357	190.356
CELE_ZK354.5	msp-51	0.96978	2.95749e-09	469.543	339.261	458.379	288.057	710.691	705.679	791.48	835.866
CELE_F54B8.4	F54B8.4	0.94428	3.12782e-09	82.3416	102.054	72.7898	91.738	169.212	145.032	183.793	174.405
CELE_C09F9.3	glna-1	0.787758	3.19493e-09	112.73	103.893	129.841	101.829	177.946	214.301	195.48	185.039
CELE_R08A2.1	R08A2.1	1.37108	3.22752e-09	36.2695	28.5016	29.5094	27.5214	68.7766	62.7752	101.989	80.8216
CELE_B0218.7	B0218.7	1.17156	3.26561e-09	52.9339	47.8091	79.6753	50.4559	118.994	122.303	137.048	140.374
CELE_F09B9.1	oac-14	2.07249	3.82968e-09	75.4798	51.4868	66.8879	65.134	146.287	151.526	381.398	409.425
CELE_F21F8.3	asp-5	0.651262	3.87082e-09	18522.9	24198.8	18654.8	23270.3	34242	33501.4	32471.9	32728.5
CELE_C25G4.6	smz-1	1.03282	3.98266e-09	123.512	142.508	194.762	119.259	283.84	260.842	326.154	314.779
CELE_ZK354.11	msp-59	1.02449	4.05021e-09	524.438	312.598	463.297	298.149	793.66	787.936	857.348	810.343
CELE_F11G11.11	col-20	1.12357	4.06788e-09	31067.3	18224.5	30382.9	18261.4	49627.2	49795.9	56811.3	57151.5
CELE_F26F12.1	col-140	1.35498	4.08732e-09	39723	20998.3	39190.4	20258.5	72707.7	72417.6	82436.1	79824.1
CELE_K05F1.9	K05F1.9	1.13006	4.14115e-09	61.7562	43.2121	56.0678	41.2821	110.261	89.8334	130.674	110.598
CELE_F17E9.5	F17E9.5	0.863655	4.14115e-09	394.064	269.386	372.802	270.627	540.387	573.635	643.808	617.86
CELE_C10G11.9	spch-2	1.16222	4.22942e-09	80.3811	52.4062	73.7735	55.0428	125.545	128.797	157.234	172.278
CELE_F57F4.3	gfi-1	1.16954	4.26106e-09	3682.83	3433.98	3685.72	3588.79	9033.75	8922.73	7142.44	7272.88
CELE_F32B6.4	F32B6.4	0.98838	4.49889e-09	54.8944	49.6479	61.9697	50.4559	97.1605	99.5744	112.613	120.169
CELE_ZK896.4	ZK896.4	0.893956	4.67748e-09	70.5785	67.1167	69.8389	67.8861	121.178	135.291	122.175	132.93
CELE_T07D10.3	T07D10.3	1.53139	4.68887e-09	19.6051	17.4687	16.722	16.5128	49.1261	45.4579	49.9323	58.4893
CELE_Y49E10.29	Y49E10.29	1.16543	5.27165e-09	167.624	101.135	139.678	100.912	339.516	298.723	248.599	254.163
CELE_Y54G2A.14	clec-83	0.638493	5.99614e-09	924.383	989.281	886.265	949.488	1339.51	1318.28	1584.02	1595.16
CELE_T27A3.3	ssp-16	1.07477	6.13979e-09	97.0455	56.0838	80.659	69.7209	146.287	136.374	183.793	171.214
CELE_C18C4.3	ugt-48	0.763013	6.61525e-09	231.341	189.398	196.729	210.997	314.407	303.052	399.458	388.157
CELE_F58A6.8	msp-45	0.939402	7.16182e-09	485.227	313.518	398.377	300.901	695.407	627.752	826.539	721.014
CELE_C47B2.6	gale-1	0.702493	7.5105e-09	1725.25	1331.3	1745.97	1370.57	2781.63	2685.26	2258.64	2318.3
CELE_T27F2.4	zip-10	1.33935	8.05523e-09	28.4275	33.0986	32.4603	39.4473	61.1347	85.5041	96.6774	94.6464
CELE_F11G11.10	col-17	1.56183	8.06139e-09	259.768	234.449	258.699	224.758	579.688	510.86	903.031	892.228
CELE_C15C6.2	C15C6.2	1.0589	8.13799e-09	360.735	226.174	342.309	243.106	529.47	515.189	702.239	693.365
CELE_C24F3.6	col-124	1.53418	8.27786e-09	30035.1	15105.8	29676.6	14392.8	57566	56911.1	71391.5	72503.4
CELE_F52B11.4	col-133	0.791537	8.29111e-09	1167.49	941.472	1132.18	920.132	1865.7	1831.3	1754.01	1750.43
CELE_T03F1.10	clec-53	0.830797	8.38349e-09	109.789	132.395	111.152	133.02	221.613	196.984	194.417	253.099
CELE_R07B1.4	gst-36	0.703258	8.87598e-09	655.792	665.65	605.926	613.727	1183.39	1102.89	887.095	964.542
CELE_F49D11.8	cpn-4	0.795378	9.07807e-09	829.298	565.435	697.405	562.354	1094.97	1134.28	1236.62	1138.95
CELE_ZK265.3	nsph-2	0.93308	9.38963e-09	150.96	109.409	137.71	112.838	241.264	198.066	250.724	283.939
CELE_F25B4.8	F25B4.8	0.76933	9.4462e-09	148.019	160.896	162.302	160.542	259.823	288.982	266.66	261.607
CELE_F48E8.1	lon-1	1.32715	9.57837e-09	617.562	355.81	571.498	358.696	1132.08	1108.31	1307.8	1226.15
CELE_F48C1.7	spe-11	0.997835	9.59308e-09	93.1245	67.1167	89.5118	76.1425	134.278	160.185	175.294	179.722
CELE_ZC168.6	ssp-34	0.952664	9.90682e-09	140.177	84.5854	120.005	94.4901	231.439	206.725	215.665	194.61
CELE_Y34B4A.5	nspg-12	0.780301	1.06319e-08	132.335	107.571	116.07	132.103	183.404	222.96	206.104	225.45
CELE_ZK858.2	ZK858.2	0.977281	1.12803e-08	84.3021	76.3107	98.3646	61.4645	136.461	161.267	154.046	177.595
CELE_Y51H7C.1	Y51H7C.1	2.14976	1.13219e-08	595.016	175.607	544.94	198.154	1477.06	1344.25	2001.54	1891.86
CELE_C35D10.11	msd-4	0.699813	1.15486e-08	293.097	234.449	300.996	215.584	403.926	440.508	420.706	428.567
CELE_K07F5.11	ssq-1	0.872408	1.15739e-08	844.982	541.53	749.538	592.627	1135.36	1158.09	1364.11	1335.68
CELE_F10D2.2	ugt-39	1.04678	1.1644e-08	92.1442	91.9406	113.119	63.2992	184.496	168.844	190.168	199.927
CELE_E02H9.5	klo-2	1.05761	1.2503e-08	267.61	206.866	245.912	189.898	558.946	527.095	389.897	417.933
CELE_F41C6.5	col-173	1.36176	1.266e-08	33.3288	45.0509	45.2477	36.6952	92.7938	72.5161	128.549	118.042
CELE_F22E10.1	pgp-12	1.17143	1.32551e-08	37.2498	56.0838	44.2641	49.5385	108.077	101.739	122.175	90.3926
CELE_C25E10.9	swm-1	0.795837	1.38601e-08	148.999	164.574	132.792	153.202	234.714	230.536	303.843	272.241
CELE_F26A1.8	F26A1.8	2.40052	1.41328e-08	9.80257	13.7911	4.91823	13.7607	76.4184	76.8455	32.9341	38.2839
CELE_F11F1.1	F11F1.1	1.01833	1.45876e-08	100.967	68.9555	98.3646	78.8947	180.129	174.255	166.795	180.785
CELE_W05G11.3	col-88	1.09416	1.51018e-08	535.221	393.506	487.888	382.547	989.072	952.451	995.459	902.863
CELE_C06B3.7	C06B3.7	1.62475	1.51118e-08	20.5854	15.6299	12.7874	12.8433	58.9513	46.5402	44.6204	40.4108
CELE_Y45F10C.2	Y45F10C.2	1.00973	1.56302e-08	204.874	111.248	201.647	160.542	363.533	310.629	356.963	332.858
CELE_C17H12.12	C17H12.12	1.01989	1.56719e-08	83.3219	57.9226	58.0351	55.9602	118.994	117.974	130.674	148.882
CELE_Y71G12B.22	Y71G12B.22	1.71179	1.74058e-08	28.4275	13.7911	18.6893	11.0086	60.043	48.7049	67.9929	57.4259
CELE_K10B3.7	gpd-3	0.620612	1.79927e-08	8043.99	9072.7	8082.62	8871.06	11459.5	11347.2	14615.3	14962.6
CELE_D1025.6	nspc-16	0.828859	1.85308e-08	99.9863	134.233	116.07	110.086	189.954	179.667	242.225	206.308
CELE_K08D8.12	K08D8.12	1.58443	1.95225e-08	21.5657	18.3881	15.7383	14.6781	50.2178	66.0221	48.8699	45.728
CELE_C05C12.5	C05C12.5	1.1495	1.98448e-08	42.1511	31.2598	49.1823	36.6952	73.1433	89.8334	100.927	88.2657
CELE_F42G2.4	fbxa-182	1.02166	2.01045e-08	67.6378	68.0361	68.8552	79.8121	116.811	135.291	154.046	171.214
CELE_C50B6.4	col-161	0.992486	2.03653e-08	910.659	804.481	957.088	753.169	1695.4	1593.19	1781.63	1744.05
CELE_C01G12.8	catp-4	0.80073	2.16281e-08	157.821	146.186	190.827	146.781	272.923	277.077	292.157	274.368
CELE_Y47D3A.31	Y47D3A.31	1.02905	2.27555e-08	53.9142	41.3733	51.1496	44.0342	97.1605	82.2571	100.927	107.408
CELE_C08E8.3	C08E8.3	2.83259	2.55906e-08	3.92103	17.4687	4.91823	21.0997	122.269	115.809	60.5562	41.4743
CELE_C54D1.2	clec-86	1.17058	2.57324e-08	42.1511	45.0509	68.8552	54.1254	120.086	98.4921	132.799	121.232
CELE_H05L14.1	H05L14.1	1.02795	2.70805e-08	58.8154	51.4868	60.0024	52.2907	90.6104	126.633	123.237	112.725
CELE_Y46G5A.30	snf-5	0.774917	2.88939e-08	280.354	209.625	258.699	200.906	391.917	361.498	437.704	431.758
CELE_Y16B4A.2	Y16B4A.2	1.00167	2.89135e-08	2806.48	2341.73	2898.81	2500.78	5611.29	5571.84	4905.05	5031.15
CELE_W03G11.1	col-181	1.30358	3.19711e-08	28378.5	14199.3	27566.7	14122.1	49214.5	49584.8	55539.6	53663.4
CELE_K07F5.9	ssp-10	0.904907	3.23155e-08	217.617	146.186	192.795	136.69	287.115	309.546	358.025	341.365
CELE_T08B6.4	T08B6.4	0.787792	3.27805e-08	232.321	167.332	212.468	168.798	351.525	296.558	352.713	345.619
CELE_Y54E10A.17	Y54E10A.17	0.686286	3.33688e-08	413.669	351.213	420.017	385.3	563.313	586.623	696.928	678.476
CELE_C18E9.5	C18E9.5	0.947216	3.35032e-08	431.313	376.957	385.589	383.465	840.602	848.547	653.37	698.682
CELE_C04G2.9	nsph-3.2	0.837538	3.46552e-08	983.198	672.086	955.12	669.687	1328.59	1451.4	1580.84	1498.39
CELE_F14H3.12	F14H3.12	0.799468	3.64128e-08	89.2034	82.7466	84.5936	110.086	177.946	161.267	142.36	157.389
CELE_F15A2.1	col-184	1.2689	3.65101e-08	17268.2	8995.47	16579.4	8905.01	29486.6	28895	33320.8	32996.5
CELE_C33F10.11	C33F10.11	1.13471	3.71162e-08	78.4206	57.0032	79.6753	55.9602	144.103	124.468	147.672	177.595
CELE_C47A4.2	ent-4	0.704137	3.82872e-08	261.729	257.434	273.454	279.801	470.519	501.119	383.523	392.41
CELE_Y37D8A.3	Y37D8A.3	0.939493	3.86256e-08	180.367	146.186	176.073	115.59	263.098	254.348	325.091	341.365
CELE_T28H11.5	ssq-2	0.827725	4.12297e-08	950.85	627.035	933.48	677.026	1358.06	1317.2	1491.59	1489.88
CELE_H22K11.1	asp-3	0.746391	4.19173e-08	34162	45919.8	33251.2	44825	69544	71183.8	61778	62820.7
CELE_Y2H9A.3	col-162	1.03113	4.20346e-08	567.569	490.044	581.335	482.542	1130.99	1076.92	1030.52	1096.41
CELE_Y69A2AR.19	Y69A2AR.19	0.821132	4.20653e-08	140.177	108.49	130.825	120.177	208.513	194.819	233.726	244.592
CELE_ZK1225.6	ssp-31	1.20817	4.25377e-08	42.1511	29.421	52.1332	33.9431	80.7852	79.0101	109.426	93.5829
CELE_C06A8.3	srlf-1	0.664324	4.2548e-08	8144.96	6557.21	8151.48	6600.55	10963.9	10892.6	12320.5	12500.8
CELE_C14F11.5	hsp-43	0.644785	4.3491e-08	988.1	870.678	1036.76	939.397	1332.96	1278.23	1688.14	1695.13
CELE_K03H1.10	cbp-2	0.596911	4.39817e-08	296.038	367.763	294.11	321.083	516.37	444.838	464.264	510.452
CELE_C33F10.12	C33F10.12	1.01117	4.41623e-08	71.5588	40.4539	68.8552	59.6297	109.169	114.727	132.799	126.55
CELE_ZK836.1	lon-3	1.46203	4.43612e-08	112.73	117.684	129.841	109.168	243.447	189.408	412.207	447.709
CELE_C08F11.10	C08F11.10	1.21439	4.72587e-08	28.4275	23.9046	30.493	31.1909	66.5932	61.6928	67.9929	68.0603
CELE_Y39B6A.20	asp-1	0.729839	4.87055e-08	112654	143974	109449	141188	224328	222083	192928	201937
CELE_Y39G10AR.16	Y39G10AR.16	1.18091	5.07669e-08	61.7562	32.1792	48.1987	44.0342	94.9772	88.7511	129.612	107.408
CELE_W10G6.3	mua-6	0.684856	5.26564e-08	1016.53	963.538	954.137	1018.29	1382.08	1365.9	1835.81	1769.57
CELE_Y57G7A.5	Y57G7A.5	1.45782	5.28349e-08	26.467	12.8717	27.5421	14.6781	53.4929	57.3635	55.2443	56.3625
CELE_ZC477.1	ssq-3	0.926258	5.57061e-08	246.045	199.511	249.846	145.863	366.808	363.663	427.081	439.202
CELE_W09G10.6	clec-125	2.09857	5.72451e-08	13.7236	9.19406	12.7874	8.25642	68.7766	54.1165	27.6221	37.2205
CELE_C34D4.3	C34D4.3	0.870036	6.07701e-08	103.907	68.0361	86.5609	68.8035	152.837	152.609	143.423	147.819
CELE_C38C3.3	C38C3.3	0.920737	6.45277e-08	49.9931	52.4062	50.166	57.7949	93.8855	95.2451	95.6151	113.788
CELE_F36H12.7	msp-19	0.939753	6.48252e-08	752.838	519.465	642.321	410.986	1093.87	1000.07	1158	1207.01
CELE_E02H9.7	E02H9.7	0.859167	6.62951e-08	175.466	135.153	188.86	121.094	302.399	295.476	251.786	274.368
CELE_Y43F8A.2	Y43F8A.2	0.979629	6.88691e-08	116.651	91.9406	114.103	77.0599	173.579	167.761	207.166	238.211
CELE_C12C8.2	cbl-1	0.701995	7.27794e-08	655.792	428.443	583.302	506.394	840.602	908.075	869.035	916.687
CELE_T09F5.11	fbxa-84	1.25513	7.49711e-08	23.5262	22.9852	27.5421	22.0171	58.9513	56.2812	58.4314	55.299
CELE_R05F9.13	msp-31	0.853764	7.63129e-08	717.548	443.154	650.19	465.112	968.33	982.756	1099.57	1060.25
CELE_Y47D7A.6	Y47D7A.6	2.21211	7.80012e-08	7.84206	4.59703	9.83646	7.33904	38.2092	36.7992	21.2478	40.4108
CELE_F32H2.7	F32H2.7	0.761171	7.9513e-08	130.374	114.926	142.629	111.003	191.046	212.137	226.289	214.815
CELE_C03H5.1	clec-10	0.992613	8.13268e-08	229.38	143.427	236.075	144.029	397.376	334.44	359.088	405.172
CELE_T22C1.8	T22C1.8	0.981004	8.25548e-08	54.8944	46.8897	50.166	44.9516	106.986	95.2451	100.927	85.0754
CELE_Y119D3B.21	Y119D3B.21	1.1151	8.5254e-08	2431.04	1483.92	2232.88	1512.76	4610.21	4239.49	3774.67	3967.7
CELE_T13F2.10	msp-79	1.05069	8.55999e-08	175.466	121.362	164.269	101.829	280.565	267.336	321.904	294.574
CELE_B0222.4	spl-2	1.00856	8.62078e-08	96.0652	109.409	66.8879	84.399	198.688	187.243	161.483	171.214
CELE_C34F6.2	col-178	1.35733	8.64827e-08	18845.5	8842.85	18211.2	8666.49	33987.6	33356.3	36707.7	35749.7
CELE_M02F4.8	aqp-7	0.975492	8.77282e-08	1998.75	1372.67	2139.43	1334.79	2861.32	3020.78	3843.73	3732.68
CELE_F49E12.2	dod-23	0.891698	9.16916e-08	2279.1	1515.18	2177.79	1483.4	3776.16	3892.06	3284.91	2877.68
CELE_C37A5.3	C37A5.3	1.19332	9.21198e-08	49.0129	76.3107	38.3622	56.8776	106.986	115.809	130.674	152.072
CELE_ZK896.3	ZK896.3	1.36842	9.43828e-08	15.6841	27.5822	27.5421	21.0997	66.5932	49.7872	57.369	63.8066
CELE_T07A5.3	vglu-3	1.16373	1.03501e-07	86.2627	57.0032	90.4954	55.0428	158.295	136.374	190.168	160.58
CELE_C34F11.5	C34F11.5	1.32216	1.06339e-07	61.7562	45.0509	83.6099	49.5385	132.095	109.315	168.92	188.229
CELE_R10E9.2	R10E9.2	0.94268	1.08121e-07	233.301	175.607	276.405	156.872	396.284	367.992	447.266	405.172
CELE_C14C10.1	C14C10.1	1.05614	1.11991e-07	105.868	68.0361	115.087	68.8035	180.129	159.103	207.166	195.673
CELE_Y73B6BL.25	acp-7	0.809848	1.1664e-07	110.769	83.666	110.168	77.0599	161.57	167.761	175.294	162.707
CELE_F54C8.1	F54C8.1	0.962314	1.20109e-07	50.9734	47.8091	59.0188	42.1995	89.5187	85.5041	104.114	109.535
CELE_T21E8.3	pgp-8	1.8503	1.29466e-07	14.7039	10.1135	11.8038	7.33904	28.384	36.7992	44.6204	47.8549
CELE_F20G2.2	F20G2.2	0.588685	1.33714e-07	590.115	550.724	534.12	536.667	888.637	831.23	812.728	793.328
CELE_T16H12.6	kel-10	0.908702	1.36545e-07	104.888	80.9078	97.381	74.3078	143.012	146.115	196.542	183.976
CELE_K01H12.4	K01H12.4	0.991194	1.39381e-07	57.8352	43.2121	57.0515	36.6952	94.9772	97.4097	101.989	91.4561
CELE_Y39G8B.7	Y39G8B.7	2.56705	1.39777e-07	1.96051	5.51644	3.93458	5.50428	26.2006	22.7289	27.6221	24.4592
CELE_C36B1.10	gskl-2	0.947161	1.41316e-07	74.4996	54.245	66.8879	52.2907	110.261	100.657	133.861	131.867
CELE_F56A11.6	F56A11.6	0.987875	1.44168e-07	68.618	45.9703	75.7408	56.8776	123.361	114.727	142.36	108.471
CELE_R07E5.15	R07E5.15	0.92024	1.47267e-07	72.5391	55.1644	79.6753	63.2992	109.169	115.809	154.046	131.867
CELE_Y54G2A.49	Y54G2A.49	1.56639	1.48361e-07	21.5657	22.0658	17.7056	22.9345	82.9685	73.5985	46.7451	46.7915
CELE_C34F11.4	msp-50	0.846194	1.50254e-07	432.294	285.016	412.148	270.627	575.321	628.834	654.432	656.144
CELE_ZK1025.3	ZK1025.3	2.04107	1.55635e-07	51.9536	34.018	41.3131	34.8604	143.012	95.2451	198.667	229.704
CELE_K10B3.8	gpd-2	0.634604	1.6578e-07	5507.09	4597.03	5881.22	5036.42	7109.09	7273.26	9191.79	9060.53
CELE_F58B4.5	F58B4.5	0.83779	1.71963e-07	511.694	328.228	538.054	362.365	791.476	816.077	718.175	782.694
CELE_Y54G11A.4	Y54G11A.4	1.03561	1.7792e-07	49.9931	70.7943	54.1005	76.1425	126.636	127.715	133.861	127.613
CELE_R105.1	R105.1	0.987772	1.8107e-07	88.2232	71.7137	94.43	58.7123	133.186	140.703	190.168	155.263
CELE_Y11D7A.11	col-120	1.07064	1.83248e-07	297.018	234.449	277.388	237.601	527.287	470.814	579.002	619.987
CELE_F14B8.3	pes-23	0.942676	1.86528e-07	127.433	94.6989	124.923	79.8121	211.788	189.408	241.162	176.531
CELE_H34I24.2	H34I24.2	0.677728	1.87488e-07	2421.24	2808.79	2208.29	3095.24	4658.25	4386.68	4233.62	3573.17
CELE_C24D10.8	nspd-6	0.929567	1.9715e-07	141.157	92.8601	114.103	80.7294	188.863	185.078	229.476	211.625
CELE_C44E4.6	acbp-1	0.756874	2.03477e-07	2578.08	1980.4	2503.38	2032	3706.29	4039.26	3810.79	3809.25
CELE_T15B7.4	col-142	1.02019	2.0359e-07	2234.99	1229.25	2085.33	1266.9	3207.39	3261.06	3654.62	3699.72
CELE_BE10.1	BE10.1	1.32032	2.09796e-07	23.5262	19.3075	23.6075	15.5955	49.1261	44.3755	52.0571	58.4893
CELE_C41G7.6	cylc-2	1.17428	2.15305e-07	72.5391	36.7763	37.3786	55.9602	123.361	108.233	106.239	119.106
CELE_T05F1.5	T05F1.5	1.00905	2.15425e-07	56.8549	44.1315	54.1005	37.6126	90.6104	85.5041	100.927	109.535
CELE_C04G2.4	msp-36	0.899034	2.27328e-07	777.344	499.238	681.667	499.055	1125.53	1102.89	1222.81	1129.38
CELE_R09E10.2	R09E10.2	1.30909	2.27643e-07	17.6446	24.824	31.4767	21.0997	58.9513	49.7872	61.6186	64.87
CELE_B0491.3	rmd-3	0.941888	2.37702e-07	142.137	98.3765	131.809	79.8121	206.33	191.572	245.412	223.323
CELE_Y47D3A.13	Y47D3A.13	1.00429	2.42145e-07	51.9536	47.8091	75.7408	53.208	109.169	123.386	104.114	121.232
CELE_Y43C5A.1	nspd-7	0.873108	2.49365e-07	150.96	136.992	153.449	105.499	217.247	221.878	270.909	290.32
CELE_T01B4.2	twk-22	0.776022	2.50748e-07	110.769	81.8272	116.07	111.003	167.029	180.749	180.606	189.293
CELE_ZC477.7	ZC477.7	0.847057	2.60061e-07	61.7562	55.1644	63.937	51.3733	100.436	104.986	113.676	97.8367
CELE_Y54E2A.7	Y54E2A.7	1.20314	2.62204e-07	32.3485	26.6628	25.5748	24.7693	67.6849	51.9519	67.9929	63.8066
CELE_T01E8.9	ubxn-5	1.09045	2.63166e-07	64.697	50.5674	52.1332	41.2821	113.536	82.2571	123.237	124.423
CELE_C48B4.1	acox-1.5	1.33645	2.69297e-07	1285.12	1219.13	1220.7	1165.99	4002.14	3963.49	2251.2	2134.33
CELE_Y39B6A.27	Y39B6A.27	1.72992	2.69773e-07	49.0129	21.1463	57.0515	22.9345	118.994	115.809	132.799	128.677
CELE_F40G12.10	F40G12.10	1.27911	2.75569e-07	42.1511	28.5016	30.493	32.1083	62.2264	61.6928	95.6151	103.154
CELE_T23B3.5	T23B3.5	0.948639	2.79267e-07	121.552	101.135	125.907	96.3249	199.78	167.761	245.412	244.592
CELE_C28A5.6	C28A5.6	0.78905	2.79782e-07	81.3614	68.0361	86.5609	72.473	136.461	128.797	146.61	120.169
CELE_F55G11.3	F55G11.3	5.33775	2.86908e-07	8.82232	0.919406	0.983646	0	147.378	165.597	55.2443	61.6797
CELE_Y46C8AL.4	clec-71	2.01118	2.89783e-07	26.467	32.1792	15.7383	45.869	153.928	142.868	98.8022	90.3926
CELE_F35E8.11	cdr-1	1.1823	2.93611e-07	49.0129	82.7466	58.0351	70.6383	159.387	194.819	125.362	112.725
CELE_M02H5.8	M02H5.8	1.40344	3.02258e-07	190.17	93.7795	166.236	78.8947	307.857	313.876	388.835	387.093
CELE_Y26E6A.3	Y26E6A.3	0.83878	3.02258e-07	175.466	104.812	130.825	132.103	230.347	245.689	241.162	253.099
CELE_Y22D7AR.9	fbxa-74	0.826935	3.03619e-07	76.4601	85.5048	79.6753	80.7294	150.653	163.432	138.111	120.169
CELE_Y46G5A.29	Y46G5A.29	1.44134	3.24395e-07	41.1708	37.6957	37.3786	33.0257	66.5932	74.6808	135.986	127.613
CELE_F34D10.8	F34D10.8	1.01796	3.28531e-07	45.0918	34.018	45.2477	31.1909	87.3353	70.3515	75.4297	80.8216
CELE_R04B5.9	ugt-47	1.48755	3.33405e-07	418.57	183.881	433.788	166.963	808.943	779.278	916.842	866.706
CELE_F55H12.5	spe-54	0.929066	3.36652e-07	42.1511	45.0509	52.1332	40.3647	86.2436	79.0101	90.3031	86.1388
CELE_R08F11.3	cyp-33C8	0.821228	3.37099e-07	117.631	157.219	127.874	137.607	208.513	212.137	247.537	287.129
CELE_K02G10.3	tmem-135	0.648023	3.43545e-07	203.894	187.559	215.419	193.567	334.058	310.629	288.97	320.096
CELE_R07G3.2	lips-17	0.833728	3.53011e-07	74.4996	78.1495	66.8879	66.0514	108.077	119.056	140.235	141.438
CELE_M70.3	M70.3	0.945465	3.56141e-07	74.4996	46.8897	72.7898	50.4559	113.536	109.315	127.487	119.106
CELE_T19D7.1	lgc-32	1.13259	3.65556e-07	71.5588	47.8091	70.8225	42.1995	128.82	103.904	135.986	139.311
CELE_Y32F6A.4	Y32F6A.4	0.762468	3.65556e-07	863.607	885.388	912.824	1004.53	1829.67	1825.89	1276.99	1287.83
CELE_ZK1010.5	ZK1010.5	0.927776	3.66317e-07	108.809	100.215	111.152	68.8035	156.112	182.914	200.792	198.864
CELE_Y77E11A.15	col-106	1.39179	3.66576e-07	16218.4	7254.12	16154.4	7001.44	29659.1	28940.4	32141.5	31611.9
CELE_F08A8.3	acox-1.3	1.03982	3.69498e-07	121.552	94.6989	146.563	99.077	185.588	203.478	262.41	296.7
CELE_ZC513.12	sth-1	1.20633	3.81982e-07	46.0721	32.1792	32.4603	20.1824	68.7766	85.5041	79.6792	66.9969
CELE_T27A3.5	T27A3.5	0.895145	3.82872e-07	58.8154	56.0838	74.7571	62.3818	97.1605	109.315	138.111	123.359
CELE_T23F11.2	T23F11.2	1.11672	4.15561e-07	41.1708	34.018	62.9534	53.208	86.2436	90.9157	126.424	110.598
CELE_C33D9.3	C33D9.3	0.708832	4.18677e-07	143.118	137.911	135.743	144.946	220.522	181.831	248.599	266.924
CELE_F38A5.3	lec-11	0.619746	4.2915e-07	217.617	286.855	236.075	292.644	432.31	408.039	370.774	378.586
CELE_R02C2.7	R02C2.7	0.690208	4.31936e-07	211.736	245.482	214.435	207.328	316.591	326.864	407.958	366.888
CELE_T16G1.5	T16G1.5	0.981841	4.3277e-07	40.1906	50.5674	46.2314	56.8776	91.7021	97.4097	110.489	84.012
CELE_F09F7.5	F09F7.5	0.645891	4.33954e-07	443.076	548.886	422.968	492.633	847.153	814.995	666.118	658.271
CELE_C31H5.6	C31H5.6	0.979833	4.40656e-07	284.275	321.792	314.767	278.884	733.617	726.244	489.762	416.869
CELE_ZC116.5	ZC116.5	1.09653	4.44823e-07	35.2893	30.3404	32.4603	23.8519	69.8683	57.3635	70.1177	62.7431
CELE_C10A4.10	C10A4.10	0.811922	4.52097e-07	68.618	74.4719	85.5772	62.3818	117.903	122.303	133.861	136.121
CELE_B0334.1	ttr-18	0.749662	4.56732e-07	465.622	539.692	429.853	545.841	716.15	689.444	986.96	939.02
CELE_C04G2.3	C04G2.3	0.992228	4.61664e-07	92.1442	69.8749	106.234	65.134	160.479	149.362	168.92	182.912
CELE_T08B2.12	T08B2.12	1.36156	4.66323e-07	31.3682	20.2269	29.5094	15.5955	54.5846	79.0101	62.681	51.0452
CELE_W02D3.5	lbp-6	1.19347	4.77328e-07	3259.36	1766.18	3159.47	1738.44	5388.59	5357.53	5986.57	5960.6
CELE_VF13D12L.3	VF13D12L.3	0.796895	4.86556e-07	2997.63	1957.42	2910.61	1910.9	4091.66	3986.22	4405.73	4499.43
CELE_D1086.17	D1086.17	0.939028	5.01626e-07	92.1442	68.9555	80.659	56.8776	137.553	113.645	155.109	164.834
CELE_T04B2.6	dhs-31	0.863577	5.5962e-07	52.9339	61.6002	69.8389	73.3904	100.436	113.645	127.487	127.613
CELE_Y41C4A.19	col-96	1.35651	5.62994e-07	257.808	107.571	249.846	130.268	436.677	429.685	509.947	530.658
CELE_Y22D7AR.10	spex-3	1.10036	5.69765e-07	807.732	425.685	721.996	474.285	1288.2	1276.07	1340.74	1302.72
CELE_T05A1.2	col-122	1.3937	5.84188e-07	40906.1	17972.6	38918.9	17798.1	74399.9	71338.6	78818.7	79170.1
CELE_W07A12.7	rhy-1	1.14549	5.97261e-07	192.13	111.248	205.582	120.177	315.499	352.84	363.337	358.38
CELE_F42G4.5	F42G4.5	0.704794	6.21646e-07	275.452	271.225	269.519	331.174	540.387	535.753	388.835	406.235
CELE_F57F4.4	bcf-1	1.09545	6.24416e-07	5325.74	4971.23	5916.63	5389.61	12553.4	11957.6	10703.6	10947.1
CELE_H04M03.1	pck-3	1.06523	6.34766e-07	54.8944	45.0509	50.166	43.1169	76.4184	109.315	124.3	93.5829
CELE_T08B1.1	T08B1.1	0.977477	6.61885e-07	1053.78	1119.84	1086.93	1017.37	2324.21	2323.76	1898.49	1876.98
CELE_W06A7.4	W06A7.4	0.973671	6.69191e-07	83.3219	65.2779	107.217	66.9687	132.095	159.103	188.043	153.136
CELE_F12B6.2	slc-17.6	0.786367	6.69225e-07	419.55	286.855	405.262	312.827	658.29	698.103	539.694	559.371
CELE_F32B6.5	sss-1	0.964844	6.80188e-07	237.222	154.46	295.094	174.302	371.175	424.273	445.141	438.138
CELE_F54F11.2	nep-17	0.744647	6.80778e-07	8991.9	13265.2	9150.86	13172.7	20193	20035	16661.5	17810.5
CELE_Y46E12A.1	cnc-6	2.98564	7.2043e-07	3.92103	13.7911	1.96729	8.25642	41.4843	35.7169	59.4938	86.1388
CELE_C02F12.5	C02F12.5	1.48459	7.33347e-07	180.367	70.7943	162.302	69.7209	328.599	299.805	345.277	376.459
CELE_Y106G6A.4	Y106G6A.4	0.962259	7.58043e-07	93.1245	61.6002	92.4627	54.1254	135.37	130.962	166.795	152.072
CELE_ZK354.2	ZK354.2	0.956633	7.64432e-07	93.1245	79.9884	122.956	77.9773	173.579	138.538	200.792	211.625
CELE_T13H10.1	kin-5	1.29665	7.69383e-07	29.4077	26.6628	32.4603	13.7607	57.8596	55.1988	69.0553	68.0603
CELE_C01B10.3	C01B10.3	0.810047	7.85525e-07	297.018	194.914	297.061	199.989	444.318	444.838	437.704	405.172
CELE_Y47G6A.15	Y47G6A.15	1.55403	7.95404e-07	427.392	305.243	429.853	265.123	796.935	774.948	1315.24	1303.78
CELE_F52H3.6	F52H3.6	0.89483	8.10907e-07	89.2034	77.2301	84.5936	90.8206	140.828	126.633	199.729	168.024
CELE_F26G1.7	msp-3	0.810386	8.31536e-07	274.472	176.526	269.519	197.237	376.634	353.922	446.204	430.694
CELE_W03C9.4	lin-29	0.780976	8.32297e-07	105.868	92.8601	106.234	80.7294	157.204	148.279	183.793	172.278
CELE_Y54G2A.13	Y54G2A.13	1.06862	8.55772e-07	38.23	23.9046	32.4603	30.2735	64.4098	62.7752	61.6186	72.3141
CELE_Y38F1A.1	Y38F1A.1	0.900856	8.56396e-07	67.6378	61.6002	79.6753	47.7038	102.619	114.727	133.861	126.55
CELE_F47C12.4	clec-79	0.807067	8.57257e-07	85.2824	63.439	82.6263	76.1425	128.82	120.139	145.547	142.501
CELE_C46C2.5	C46C2.5	0.79044	8.62197e-07	189.19	143.427	221.32	135.772	287.115	320.37	300.656	282.876
CELE_F38B2.6	F38B2.6	1.37047	8.67071e-07	43.1313	23.9046	50.166	33.9431	85.1519	83.3394	105.177	115.915
CELE_D2007.1	D2007.1	0.679296	9.10259e-07	145.078	144.347	137.71	148.616	248.906	205.643	245.412	222.259
CELE_C30G7.3	C30G7.3	0.992796	9.32582e-07	80.3811	74.4719	91.4791	53.208	143.012	128.797	188.043	135.057
CELE_Y69E1A.2	nsph-3.1	0.860218	9.71623e-07	443.076	285.935	435.755	268.792	610.256	601.776	694.803	693.365
CELE_Y39E4A.3	bckd-1A	0.667818	1.04592e-06	2716.29	1796.52	2668.63	2041.17	3710.66	3816.3	3554.76	3567.85
CELE_K07F5.3	msp-56	0.903277	1.05157e-06	503.852	336.503	387.557	282.553	684.491	611.517	751.109	776.313
CELE_F53E10.4	irg-3	0.661324	1.06038e-06	319.564	436.718	331.489	433.921	627.723	556.318	670.368	554.054
CELE_K04E7.2	pept-1	0.594807	1.06754e-06	1934.05	2076.94	1924.01	2061.35	3362.41	3280.54	2743.09	2691.57
CELE_ZC116.2	cyc-2.2	0.893275	1.07472e-06	92.1442	76.3107	101.316	57.7949	143.012	138.538	146.61	178.658
CELE_Y39A3A.4	Y39A3A.4	1.64876	1.09462e-06	8.82232	10.1135	13.771	12.8433	32.7507	29.2229	39.3084	41.4743
CELE_Y106G6H.13	Y106G6H.13	0.926311	1.11557e-06	120.572	75.3913	110.168	89.9032	149.562	174.255	202.916	224.386
CELE_F23C8.7	F23C8.7	1.18751	1.16131e-06	31.3682	28.5016	33.444	22.0171	45.851	73.5985	71.1801	71.2507
CELE_C50F4.10	C50F4.10	1.34015	1.18677e-06	16.6644	15.6299	18.6893	17.4302	46.9427	40.0462	37.1836	48.9184
CELE_K08C9.2	K08C9.2	1.06243	1.22775e-06	106.848	79.069	121.972	60.5471	175.762	175.338	194.417	222.259
CELE_C09G5.3	col-79	1.61664	1.23789e-06	34.309	21.1463	41.3131	21.0997	60.043	83.3394	116.863	99.9636
CELE_C55C3.3	C55C3.3	0.82501	1.3517e-06	61.7562	68.0361	71.8062	70.6383	120.086	106.068	137.048	119.106
CELE_T03F6.6	T03F6.6	0.895596	1.40324e-06	54.8944	64.3585	62.9534	50.4559	91.7021	91.9981	125.362	123.359
CELE_ZK1251.2	ins-7	1.38849	1.40992e-06	17.6446	15.6299	21.6402	26.604	43.6677	40.0462	61.6186	68.0603
CELE_K02G10.7	aqp-8	1.06445	1.42072e-06	1796.81	1112.48	1750.89	1126.54	3661.53	3664.77	2379.75	2394.87
CELE_F36A2.10	F36A2.10	0.844912	1.42866e-06	80.3811	67.1167	106.234	68.8035	125.545	149.362	155.109	147.819
CELE_Y39G8B.9	Y39G8B.9	1.09783	1.44012e-06	90.1837	142.508	66.8879	135.772	228.164	209.972	252.849	242.465
CELE_B0213.4	nlp-29	0.896187	1.44756e-06	702.845	630.713	588.22	698.126	1053.48	891.84	1414.04	1516.47
CELE_F59E11.5	F59E11.5	0.619433	1.45451e-06	155.861	160.896	124.923	149.533	219.43	209.972	234.788	244.592
CELE_Y105C5B.5	Y105C5B.5	1.01617	1.47085e-06	1523.32	870.678	1581.7	875.181	2591.68	2569.45	2396.75	2251.31
CELE_T22C8.2	chhy-1	0.809157	1.52039e-06	140.177	99.2959	144.596	98.1597	239.08	215.384	186.981	202.054
CELE_ZK856.5	ZK856.5	0.877873	1.52111e-06	291.136	272.144	300.012	285.305	610.256	637.493	456.828	406.235
CELE_K09F6.4	K09F6.4	0.872591	1.58394e-06	84.3021	55.1644	54.1005	52.2907	108.077	113.645	118.988	108.471
CELE_T22G5.6	lbp-8	3.1347	1.59089e-06	22.5459	1.83881	9.83646	1.83476	73.1433	60.6105	103.052	77.6313
CELE_C31H2.2	dpy-8	1.59756	1.60464e-06	82.3416	88.263	83.6099	67.8861	159.387	166.679	307.031	341.365
CELE_Y39H10B.2	Y39H10B.2	0.677003	1.60778e-06	233.301	170.09	193.778	187.146	308.949	299.805	337.84	306.271
CELE_K04E7.3	nas-33	1.45989	1.61427e-06	21.5657	36.7763	16.722	30.2735	60.043	62.7752	86.0536	81.8851
CELE_F41E6.15	F41E6.15	0.765769	1.64084e-06	97.0455	96.5377	123.939	122.012	211.788	169.926	163.608	202.054
CELE_C17F3.1	C17F3.1	0.995737	1.65895e-06	51.9536	34.9374	51.1496	48.6211	82.9685	79.0101	99.8646	109.535
CELE_F09C8.1	F09C8.1	1.40472	1.70708e-06	1562.53	1062.83	1544.32	993.523	4029.43	4121.51	2754.78	2763.89
CELE_W01B6.2	ttbk-4	0.945796	1.76222e-06	55.8747	54.245	80.659	46.7864	102.619	109.315	135.986	108.471
CELE_C04E12.4	C04E12.4	0.891103	1.79745e-06	98.0257	67.1167	86.5609	62.3818	131.003	141.785	147.672	160.58
CELE_F08H9.6	clec-57	1.19784	1.83534e-06	119.591	57.9226	112.136	77.0599	215.063	159.103	229.476	236.084
CELE_C31C9.1	tag-10	0.893189	1.88194e-06	904.778	524.062	893.151	540.337	1383.17	1318.28	1324.8	1287.83
CELE_H03A11.2	H03A11.2	0.585127	1.88424e-06	252.906	336.503	312.799	322	501.086	449.167	429.205	458.344
CELE_R107.7	gst-1	0.63585	1.91735e-06	4340.58	3242.75	4565.1	3287.89	6533.77	6171.45	5560.55	5718.13
CELE_F07A5.2	spsp-1	0.887074	1.95004e-06	169.585	123.2	178.04	131.185	264.189	211.054	341.027	295.637
CELE_T03F1.3	pgk-1	0.586961	2.03411e-06	4321.96	3121.38	4397.88	3214.5	5792.51	5593.48	5615.79	5610.72
CELE_R02E12.6	hrg-1	0.743113	2.09596e-06	131.355	182.962	160.334	196.319	256.547	250.018	302.781	314.779
CELE_H08M01.1	H08M01.1	1.2863	2.17608e-06	19.6051	13.7911	17.7056	22.9345	41.4843	49.7872	40.3708	48.9184
CELE_C27D6.3	C27D6.3	1.0377	2.17833e-06	77.4403	39.5345	82.6263	55.9602	111.353	135.291	135.986	140.374
CELE_T08A9.11	ttr-59	0.680828	2.18252e-06	273.492	276.741	284.274	299.066	400.651	384.227	499.323	532.785
CELE_K07F5.1	msp-81	0.919511	2.2182e-06	744.015	463.381	705.274	477.955	1149.55	1011.98	1198.38	1160.22
CELE_K08D10.8	scrm-5	1.02922	2.31199e-06	43.1313	31.2598	48.1987	31.1909	75.3267	79.0101	74.3673	84.012
CELE_ZK550.5	phyh-1	0.960107	2.31505e-06	103.907	67.1167	83.6099	60.5471	136.461	123.386	180.606	171.214
CELE_T02E1.6	T02E1.6	0.966172	2.35091e-06	47.0524	45.0509	34.4276	39.4473	74.235	71.4338	94.5527	84.012
CELE_K07C11.5	cri-2	0.634681	2.51682e-06	214.676	238.126	228.206	259.619	324.232	310.629	431.33	394.537
CELE_M28.9	M28.9	0.963573	2.53576e-06	77.4403	57.9226	94.43	48.6211	118.994	132.044	143.423	146.755
CELE_B0454.5	B0454.5	1.49043	2.60701e-06	78.4206	29.421	60.0024	28.4388	125.545	126.633	149.797	147.819
CELE_C05E4.1	srp-2	0.615936	2.61923e-06	522.477	479.011	475.101	442.177	723.791	911.322	643.808	661.461
CELE_F21H7.1	gst-22	0.789564	2.84477e-06	114.69	97.4571	110.168	113.755	153.928	162.35	210.353	226.513
CELE_K02E11.1	ent-3	1.16838	2.85126e-06	49.9931	32.1792	40.3295	26.604	92.7938	55.1988	94.5527	91.4561
CELE_Y46C8AL.5	clec-72	1.29991	2.8869e-06	191.15	448.67	178.04	402.73	757.634	733.82	736.236	779.503
CELE_C33C12.8	gba-2	0.939087	3.20654e-06	36.2695	49.6479	40.3295	42.1995	77.5101	86.5864	73.3049	86.1388
CELE_C15F1.6	art-1	0.634694	3.37421e-06	3724.98	2777.53	4069.34	2808.1	5449.72	5165.96	5170.65	4985.42
CELE_B0379.2	B0379.2	1.13026	3.39971e-06	34.309	22.9852	35.4113	18.3476	60.043	59.5282	63.7434	58.4893
CELE_Y54F10BM.3	Y54F10BM.3	0.85269	3.73609e-06	50.9734	39.5345	52.1332	39.4473	81.8769	86.5864	75.4297	84.012
CELE_K03H1.1	gln-2	0.931071	3.74012e-06	146.058	107.571	140.661	102.747	208.513	188.325	256.036	293.51
CELE_F26A3.5	F26A3.5	1.15728	3.74458e-06	44.1116	19.3075	35.4113	31.1909	67.6849	62.7752	79.6792	78.6947
CELE_ZK909.6	ZK909.6	0.756284	3.76756e-06	96.0652	79.069	90.4954	82.5642	120.086	150.444	179.544	137.184
CELE_C09B9.2	C09B9.2	0.920013	3.82414e-06	48.0326	37.6957	31.4767	46.7864	73.1433	74.6808	81.804	80.8216
CELE_R10E4.7	R10E4.7	0.945518	3.82848e-06	50.9734	48.7285	76.7244	41.2821	105.894	102.821	109.426	99.9636
CELE_R09E12.9	R09E12.9	1.07059	3.92991e-06	138.216	64.3585	135.743	86.2337	219.43	229.454	211.416	229.704
CELE_Y43F8C.1	nlp-25	2.13345	3.99843e-06	5.88154	5.51644	5.90188	6.42166	18.5588	23.8113	38.246	23.3957
CELE_C50H11.15	cyp-33C9	0.594363	4.01712e-06	221.538	228.013	186.893	239.436	306.765	305.217	338.902	372.205
CELE_ZK596.2	ZK596.2	1.10097	4.02344e-06	26.467	27.5822	39.3458	20.1824	57.8596	51.9519	69.0553	63.8066
CELE_C03C11.1	C03C11.1	0.984045	4.0559e-06	44.1116	37.6957	46.2314	32.1083	73.1433	87.6688	84.9912	70.1872
CELE_K02E11.10	K02E11.10	1.65508	4.23439e-06	148.999	90.1018	138.694	96.3249	291.482	281.406	471.701	447.709
CELE_C10H11.3	ugt-25	1.15505	4.33953e-06	109.789	70.7943	128.858	58.7123	193.229	174.255	207.166	243.528
CELE_K09C6.7	K09C6.7	1.05103	4.41953e-06	65.6773	60.6808	46.2314	34.8604	89.5187	94.1627	127.487	118.042
CELE_F42A10.6	F42A10.6	0.939943	4.5505e-06	1016.53	822.869	1007.25	762.343	1937.75	1966.59	1543.65	1474.99
CELE_ZK945.7	ZK945.7	0.890994	4.66271e-06	117.631	68.9555	115.087	80.7294	149.562	166.679	193.355	197.8
CELE_F36A2.12	F36A2.12	1.17069	4.76663e-06	18.6249	22.9852	24.5912	20.1824	44.7593	43.2932	61.6186	44.6646
CELE_M162.5	M162.5	1.36231	4.89387e-06	59.7957	106.651	54.1005	112.838	157.204	154.773	281.533	264.797
CELE_F56D6.17	F56D6.17	1.16011	4.94928e-06	25.4867	35.8569	35.4113	17.4302	74.235	56.2812	70.1177	54.2356
CELE_K11D12.13	K11D12.13	0.97971	5.00925e-06	1238.07	701.507	1207.92	629.323	1902.82	1910.31	1797.56	1835.5
CELE_Y39B6A.21	Y39B6A.21	1.02599	5.17905e-06	89.2034	55.1644	97.381	56.8776	169.212	154.773	132.799	149.945
CELE_F32G8.6	cat-4	1.1122	5.20306e-06	1121.41	670.247	1131.19	648.588	2171.37	2223.11	1703.01	1621.75
CELE_F41E6.12	F41E6.12	0.715925	5.21882e-06	142.137	122.281	161.318	181.641	212.88	243.524	283.658	257.353
CELE_M02D8.5	M02D8.5	1.30953	5.37769e-06	49.9931	27.5822	52.1332	27.5214	73.1433	88.7511	128.549	97.8367
CELE_C18H7.11	C18H7.11	1.44712	5.43102e-06	34.309	26.6628	28.5257	29.3562	75.3267	40.0462	104.114	104.217
CELE_Y1A5A.1	Y1A5A.1	1.20309	5.57216e-06	23.5262	29.421	31.4767	15.5955	46.9427	54.1165	75.4297	53.1721
CELE_B0280.11	B0280.11	1.35437	5.89192e-06	17.6446	15.6299	23.6075	11.9259	45.851	37.8816	36.1212	55.299
CELE_F46C3.6	F46C3.6	0.925878	6.47862e-06	44.1116	56.0838	41.3131	51.3733	73.1433	81.1748	109.426	103.154
CELE_F22E10.5	cept-1	0.780816	6.52027e-06	600.898	411.894	686.585	425.664	956.322	979.509	846.724	866.706
CELE_F40H3.2	F40H3.2	1.56526	6.75388e-06	81.3614	22.9852	63.937	30.2735	149.562	151.526	149.797	135.057
CELE_C45B11.2	C45B11.2	2.50089	6.80107e-06	0.980257	3.67763	5.90188	2.75214	18.5588	19.4819	16.9982	20.2054
CELE_K08B4.6	cpi-1	0.622732	6.89425e-06	1416.47	1268.78	1339.73	1292.59	1753.26	1711.16	2304.32	2418.27
CELE_F56D2.5	F56D2.5	0.736456	6.90837e-06	60.776	83.666	66.8879	77.0599	117.903	120.139	124.3	119.106
CELE_F47D12.7	F47D12.7	0.976008	6.98363e-06	53.9142	61.6002	70.8225	55.9602	89.5187	101.739	151.922	132.93
CELE_F35E8.8	gst-38	1.15752	6.98557e-06	83.3219	155.38	95.4137	155.037	342.791	330.111	214.603	205.244
CELE_F21A3.3	F21A3.3	0.620145	7.11588e-06	138.216	128.717	122.956	102.747	184.496	177.502	184.856	209.498
CELE_R08E5.1	R08E5.1	1.08087	7.11602e-06	39.2103	31.2598	44.2641	32.1083	99.3439	75.7631	62.681	72.3141
CELE_F54H5.5	F54H5.5	1.26602	7.33826e-06	15.6841	15.6299	20.6566	15.5955	34.9341	35.7169	44.6204	46.7915
CELE_Y48G8AL.12	Y48G8AL.12	0.756983	7.41962e-06	206.834	284.097	243.944	250.445	418.118	409.121	424.956	413.679
CELE_C50E10.1	C50E10.1	0.869946	7.53344e-06	73.5193	67.1167	102.299	56.8776	127.728	119.056	161.483	138.248
CELE_F55B11.3	F55B11.3	0.692216	7.55917e-06	1629.19	1072.03	1632.85	1255.89	2446.48	2512.09	2097.16	1974.81
CELE_Y45G12C.2	gst-10	0.686817	7.65367e-06	467.583	408.216	407.23	351.357	764.184	766.29	538.631	561.498
CELE_F26F4.2	F26F4.2	0.876784	7.65682e-06	45.0918	48.7285	57.0515	55.0428	98.2522	72.5161	109.426	97.8367
CELE_T28H11.7	T28H11.7	0.814277	7.65682e-06	92.1442	76.3107	64.9206	55.9602	118.994	117.974	146.61	124.423
CELE_H32K16.1	slc-36.4	0.628598	8.21906e-06	97.0455	102.974	106.234	93.5728	162.662	134.209	158.296	162.707
CELE_Y54G2A.46	pudl-1	0.78358	8.41948e-06	49.9931	60.6808	52.1332	50.4559	78.6018	91.9981	103.052	93.5829
CELE_Y54G2A.37	Y54G2A.37	2.4347	8.98587e-06	1.96051	9.19406	0.983646	10.0912	41.4843	37.8816	18.0606	24.4592
CELE_C33C12.3	gba-1	0.705847	9.52765e-06	528.359	699.668	541.005	682.531	1085.14	1161.34	878.596	875.213
CELE_C36H8.1	C36H8.1	0.761876	9.63141e-06	99.9863	84.5854	93.4464	78.8947	138.645	120.139	175.294	170.151
CELE_C12C8.1	hsp-70	1.21075	9.74972e-06	27.4472	22.0658	35.4113	27.5214	54.5846	51.9519	84.9912	68.0603
CELE_W02B12.12	W02B12.12	0.794947	9.84343e-06	177.427	125.039	181.975	127.516	222.705	222.96	309.155	305.208
CELE_C10H11.7	C10H11.7	1.34066	1.02217e-05	17.6446	11.9523	17.7056	11.9259	38.2092	28.1406	42.4956	40.4108
CELE_Y53G8AR.7	mfsd-8	0.800173	1.0233e-05	201.933	225.255	202.631	199.071	468.336	408.039	286.845	280.749
CELE_C31H1.5	C31H1.5	1.03273	1.02493e-05	45.0918	28.5016	33.444	30.2735	50.2178	69.2691	79.6792	80.8216
CELE_C08F11.11	ule-4	0.589535	1.08357e-05	5568.84	4178.7	5534.98	4114.45	6956.26	6974.54	7634.33	7620.63
CELE_C29F9.3	pals-23	0.674954	1.12016e-05	166.644	275.822	198.697	245.858	381	333.358	356.963	346.682
CELE_K07A1.5	K07A1.5	0.929837	1.12322e-05	38.23	40.4539	60.0024	40.3647	70.9599	84.4218	91.3655	93.5829
CELE_F58A6.9	F58A6.9	0.806827	1.12322e-05	122.532	76.3107	102.299	70.6383	150.653	149.362	176.357	172.278
CELE_T02G5.8	kat-1	0.770193	1.14439e-05	4686.61	2962.33	4690.02	2815.44	6171.33	6284.01	6856.66	6531.66
CELE_T23B7.1	nspd-4	0.962803	1.15111e-05	118.611	72.6331	120.005	67.8861	144.103	177.502	200.792	214.815
CELE_T15B7.5	col-141	1.37137	1.20054e-05	14.7039	15.6299	15.7383	10.0912	30.5674	34.6346	42.4956	37.2205
CELE_ZK1025.7	bah-1	1.73644	1.21979e-05	8.82232	7.35525	7.86917	10.0912	22.9255	25.9759	31.8717	32.9667
CELE_Y73B6BL.31	Y73B6BL.31	0.65655	1.22809e-05	381.32	267.547	356.08	249.527	509.82	471.896	475.951	517.897
CELE_C04H5.2	clec-147	0.748585	1.25738e-05	98.0257	110.329	106.234	83.4816	167.029	169.926	173.169	158.453
CELE_C50C3.2	C50C3.2	1.07137	1.27633e-05	30.388	26.6628	19.6729	22.9345	44.7593	44.3755	59.4938	60.6162
CELE_R09E10.3	acs-18	1.0272	1.27633e-05	65.6773	45.9703	62.9534	37.6126	79.6935	97.4097	124.3	129.74
CELE_C28D4.5	C28D4.5	1.02311	1.30143e-05	42.1511	42.2927	36.3949	25.6866	64.4098	60.6105	87.1159	85.0754
CELE_C05D2.3	basl-1	1.147	1.31085e-05	40.1906	24.824	30.493	30.2735	45.851	74.6808	72.2425	85.0754
CELE_H43E16.1	H43E16.1	0.675374	1.31518e-05	280.354	388.909	308.865	462.36	587.33	562.812	564.129	588.084
CELE_F13D12.3	F13D12.3	0.764657	1.34833e-05	219.578	221.577	228.206	205.493	320.957	292.229	477.013	395.601
CELE_K04G2.4	K04G2.4	1.09621	1.3636e-05	68.618	26.6628	52.1332	43.1169	98.2522	91.9981	116.863	98.9002
CELE_C50F2.5	C50F2.5	1.09381	1.39794e-05	24.5064	23.9046	33.444	27.5214	56.768	54.1165	72.2425	49.9818
CELE_K09E4.1	K09E4.1	0.967002	1.41522e-05	82.3416	65.2779	105.25	50.4559	125.545	132.044	163.608	170.151
CELE_F44F4.11	tba-4	1.17181	1.41525e-05	1083.18	499.238	1185.29	545.841	1875.53	1846.46	1881.49	1859.96
CELE_D2062.7	msrp-5	1.02955	1.47449e-05	65.6773	32.1792	42.2968	36.6952	79.6935	93.0804	88.1783	98.9002
CELE_F21F3.2	F21F3.2	1.26839	1.51867e-05	12.7433	11.9523	19.6729	14.6781	36.0258	34.6346	35.0589	36.157
CELE_C49G7.5	irg-2	1.0001	1.57126e-05	27.4472	23.9046	23.6075	26.604	45.851	56.2812	50.9947	49.9818
CELE_C53B4.5	col-119	1.30807	1.59373e-05	43009.8	17260	41717.4	16983.5	72044	68823.2	76824.6	76889
CELE_W09C3.2	W09C3.2	1.48031	1.69698e-05	13.7236	8.27466	13.771	12.8433	22.9255	32.4699	44.6204	35.0936
CELE_Y47H10A.5	Y47H10A.5	0.889657	1.73671e-05	68.618	75.3913	73.7735	97.2423	133.186	134.209	148.735	168.024
CELE_F53H4.2	F53H4.2	0.77438	1.75103e-05	1494.89	912.051	1423.34	890.776	2110.24	2140.85	1942.05	1880.17
CELE_C45G9.9	C45G9.9	0.848689	1.7532e-05	77.4403	51.4868	88.5282	59.6297	121.178	130.962	142.36	103.154
CELE_T21B10.2	enol-1	0.633724	1.75483e-05	15980.2	11091.7	16301	10711.3	21009.6	21037.3	20974.8	20891.3
CELE_F47G4.3	gpdh-1	0.881218	1.79478e-05	99.006	65.2779	101.316	60.5471	138.645	130.962	163.608	165.897
CELE_C44H9.4	C44H9.4	0.722729	1.79478e-05	58.8154	52.4062	70.8225	58.7123	103.711	99.5744	92.4279	101.027
CELE_F32B4.2	F32B4.2	0.99826	1.79717e-05	27.4472	28.5016	40.3295	30.2735	56.768	55.1988	70.1177	70.1872
CELE_F35E2.9	F35E2.9	0.961755	1.81628e-05	46.0721	26.6628	50.166	40.3647	81.8769	70.3515	74.3673	90.3926
CELE_Y38H6C.1	dct-16	1.31973	1.86587e-05	10846.5	4792.87	10934.2	4528.19	19892.8	20332.7	18860.6	18548.6
CELE_C08F11.8	ugt-22	1.01669	1.87513e-05	3520.1	1811.23	3476.21	1740.27	5522.87	5398.66	5154.71	5262.98
CELE_F08H9.7	clec-56	1.06732	1.88556e-05	547.964	354.891	562.646	358.696	1018.55	1013.06	865.847	924.132
CELE_C39B5.5	C39B5.5	0.945467	1.93304e-05	133.315	79.9884	149.514	90.8206	205.238	199.149	249.662	218.006
CELE_F25E5.5	F25E5.5	0.725453	1.93903e-05	112.73	114.926	141.645	111.92	196.504	183.996	178.481	236.084
CELE_F32B5.4	msrp-1	0.969311	1.93997e-05	72.5391	44.1315	59.0188	36.6952	89.5187	97.4097	117.925	109.535
CELE_R05F9.12	aagr-2	0.835063	1.9772e-05	3096.63	2163.36	3312.92	2133.83	4556.72	4690.82	4944.36	4906.72
CELE_C17H12.5	C17H12.5	0.856679	1.9974e-05	55.8747	46.8897	51.1496	35.7778	79.6935	76.8455	97.7398	88.2657
CELE_F56A4.2	F56A4.2	2.33772	2.00005e-05	983.198	664.731	671.83	625.653	4046.9	5152.97	2572.05	3116.95
CELE_R07E5.6	R07E5.6	1.03134	2.06901e-05	57.8352	40.4539	50.166	32.1083	72.0516	76.8455	113.676	105.281
CELE_F20D1.5	arl-7	1.31181	2.19156e-05	26.467	19.3075	26.5584	28.4388	81.8769	81.1748	45.6828	41.4743
CELE_C12D8.18	fipr-5	0.820612	2.32782e-05	58.8154	50.5674	52.1332	38.53	96.0688	81.1748	96.6774	78.6947
CELE_Y77E11A.10	clp-6	0.731525	2.33969e-05	71.5588	68.0361	69.8389	58.7123	94.9772	115.809	115.8	118.042
CELE_C44B7.8	pmp-1	0.796861	2.34884e-05	580.312	636.229	651.174	575.197	1258.72	1298.8	831.851	855.008
CELE_T26E4.4	T26E4.4	2.67614	2.35462e-05	0.980257	1.83881	3.93458	3.66952	18.5588	19.4819	13.8111	14.8882
CELE_W09D6.4	W09D6.4	1.05926	2.36916e-05	43.1313	27.5822	47.215	38.53	73.1433	66.0221	108.364	77.6313
CELE_F22B5.5	F22B5.5	1.10957	2.41968e-05	21.5657	22.0658	18.6893	18.3476	40.3926	42.2109	39.3084	52.1087
CELE_B0554.6	dod-20	2.26051	2.50754e-05	4.90129	4.59703	2.95094	3.66952	15.2837	16.235	16.9982	28.7129
CELE_R155.2	moa-1	0.826996	2.54663e-05	50.9734	53.3256	55.0842	49.5385	79.6935	82.2571	88.1783	120.169
CELE_ZK1307.4	ZK1307.4	1.0055	2.60793e-05	59.7957	34.9374	38.3622	52.2907	101.527	84.4218	98.8022	87.2023
CELE_F58A6.1	F58A6.1	0.629998	2.63058e-05	296.038	339.261	314.767	290.809	530.562	458.908	449.391	481.739
CELE_R09B5.6	hacd-1	1.03376	2.63902e-05	1344.91	711.621	1335.79	708.217	1992.34	2033.7	2166.21	2201.33
CELE_T01B11.4	ant-1.4	1.02135	2.65699e-05	48.0326	43.2121	65.9043	31.1909	78.6018	93.0804	87.1159	122.296
CELE_ZK795.2	ZK795.2	0.873293	2.69574e-05	39.2103	38.6151	45.2477	41.2821	64.4098	85.5041	69.0553	81.8851
CELE_T12B5.1	fbxa-51	0.840906	2.69836e-05	61.7562	41.3733	38.3622	45.869	82.9685	71.4338	93.4903	87.2023
CELE_ZK1251.1	htas-1	1.05637	2.7227e-05	43.1313	24.824	40.3295	22.9345	52.4012	66.0221	73.3049	79.7582
CELE_B0273.1	B0273.1	0.960599	2.73736e-05	33.3288	34.018	27.5421	26.604	62.2264	50.8695	54.1819	69.1238
CELE_F58G1.3	F58G1.3	1.01714	2.73955e-05	80.3811	60.6808	52.1332	47.7038	88.427	109.315	157.234	131.867
CELE_F11G11.8	nspd-5	0.89117	2.74347e-05	237.222	148.024	226.239	124.764	312.224	312.793	360.15	378.586
CELE_ZK484.8	nspd-1	0.983892	2.80872e-05	273.492	152.621	258.699	150.45	394.101	349.593	452.578	454.09
CELE_W07B8.1	cpr-8	0.862874	2.84675e-05	75.4798	50.5674	94.43	56.8776	125.545	123.386	133.861	120.169
CELE_C03E10.5	clec-223	0.595274	2.85874e-05	859.686	650.94	911.84	599.967	1232.52	1095.32	1100.64	1135.76
CELE_F27C8.5	pei-1	0.882806	2.87483e-05	52.9339	41.3733	38.3622	37.6126	68.7766	67.1045	82.8664	94.6464
CELE_ZK1053.2	ZK1053.2	0.992946	2.88573e-05	45.0918	34.018	52.1332	34.8604	67.6849	83.3394	90.3031	88.2657
CELE_F38H4.4	F38H4.4	0.857064	2.90378e-05	45.0918	38.6151	41.3131	39.4473	74.235	62.7752	92.4279	68.0603
CELE_C29E4.1	col-90	1.46357	3.03982e-05	78.4206	90.1018	89.5118	87.1511	187.771	174.255	281.533	308.398
CELE_F40F12.3	F40F12.3	1.07886	3.05774e-05	30.388	23.9046	30.493	18.3476	60.043	41.1286	56.3066	59.5528
CELE_C25D7.1	melo-3	0.912667	3.0962e-05	35.2893	32.1792	35.4113	24.7693	62.2264	59.5282	54.1819	63.8066
CELE_ZK616.65	ZK616.65	1.16978	3.09871e-05	17.6446	16.5493	19.6729	22.0171	36.0258	41.1286	56.3066	37.2205
CELE_R05D8.8	dhs-14	1.04933	3.14416e-05	198.992	124.12	202.631	154.12	263.098	242.442	429.205	471.105
CELE_F47B3.7	F47B3.7	0.896404	3.45508e-05	44.1116	31.2598	30.493	35.7778	63.3181	76.8455	65.8682	57.4259
CELE_C37A2.3	acdh-5	1.01747	3.48653e-05	28.4275	23.9046	26.5584	21.0997	41.4843	51.9519	58.4314	49.9818
CELE_T07H8.11	T07H8.11	2.7173	3.51704e-05	1.96051	0.919406	1.96729	4.5869	16.3754	14.0703	15.9358	15.9516
CELE_Y49E10.10	Y49E10.10	0.999312	3.57679e-05	51.9536	41.3733	40.3295	29.3562	58.9513	77.9278	86.0536	102.09
CELE_R02F2.8	R02F2.8	0.651143	3.61745e-05	146.058	102.974	132.792	106.416	201.963	186.161	191.23	186.102
CELE_W02B12.4	cest-15	0.663554	3.63513e-05	83.3219	72.6331	89.5118	88.9859	106.986	129.88	152.984	139.311
CELE_Y37E11AL.2	Y37E11AL.2	0.901277	3.63797e-05	43.1313	43.2121	34.4276	41.2821	75.3267	59.5282	90.3031	77.6313
CELE_C27C7.3	nhr-74	3.46778	3.7315e-05	0.980257	0.919406	2.95094	0.91738	10.9169	6.49398	22.3102	23.3957
CELE_Y46G5A.20	Y46G5A.20	1.04717	3.75189e-05	49.0129	62.5196	28.5257	61.4645	77.5101	104.986	131.736	103.154
CELE_C06B3.3	cyp-35C1	0.999883	3.75189e-05	1790.93	1006.75	1868.93	955.91	3032.72	3018.62	2636.85	2554.39
CELE_T23F4.4	nas-27	1.60028	3.77145e-05	15.6841	6.43585	19.6729	9.1738	28.384	36.7992	50.9947	37.2205
CELE_W09C5.4	ins-33	1.59572	3.79597e-05	22.5459	9.19406	12.7874	7.33904	38.2092	36.7992	36.1212	44.6646
CELE_F11C7.3	vap-1	0.63276	4.03942e-05	207.815	262.031	237.059	307.322	328.599	366.91	416.457	461.534
CELE_ZC513.14	ZC513.14	1.56215	4.09552e-05	4.90129	13.7911	10.8201	12.8433	33.8424	24.8936	29.7469	37.2205
CELE_K07A1.21	K07A1.21	1.27834	4.11605e-05	25.4867	16.5493	24.5912	8.25642	40.3926	44.3755	46.7451	48.9184
CELE_T22B3.1	dpy-20	1.77822	4.1269e-05	6.8618	6.43585	7.86917	6.42166	16.3754	23.8113	32.9341	21.2689
CELE_Y39A3B.7	Y39A3B.7	3.32001	4.17744e-05	0.980257	0.919406	2.95094	0.91738	15.2837	16.235	10.6239	14.8882
CELE_F46F2.3	F46F2.3	1.57022	4.19656e-05	1936.01	621.519	1942.7	576.115	3752.14	3508.91	3828.85	3982.59
CELE_M28.8	M28.8	0.834225	4.35128e-05	231.341	346.616	255.748	319.248	648.465	599.611	410.082	398.791
CELE_F42G10.1	F42G10.1	0.924797	4.41528e-05	210.755	149.863	232.14	141.277	280.565	344.181	390.959	376.459
CELE_F09E5.15	prdx-2	0.606824	4.49755e-05	13752	9730.08	14256	10585.6	19375.3	18638.8	18041.5	17535.1
CELE_Y37E11B.10	Y37E11B.10	1.02817	4.5061e-05	103.907	71.7137	68.8552	52.2907	153.928	103.904	168.92	177.595
CELE_F42A9.7	F42A9.7	0.997791	4.52359e-05	31.3682	22.9852	30.493	25.6866	45.851	51.9519	56.3066	65.9334
CELE_R13A5.6	ttr-8	0.735137	4.54187e-05	69.5983	82.7466	62.9534	88.0685	115.719	115.809	131.736	142.501
CELE_C15H11.1	C15H11.1	1.06004	4.61583e-05	19.6051	18.3881	25.5748	21.0997	42.576	43.2932	48.8699	41.4743
CELE_C55A6.7	C55A6.7	0.704607	4.66507e-05	116.651	132.395	106.234	119.259	233.622	213.219	183.793	143.565
CELE_F42A8.1	F42A8.1	1.71688	4.75117e-05	504.833	133.314	444.608	124.764	839.511	889.675	1098.51	1140.01
CELE_F31E8.5	F31E8.5	1.0338	4.76637e-05	51.9536	25.7434	53.1169	37.6126	80.7852	76.8455	109.426	76.5679
CELE_F21H7.2	F21H7.2	0.758893	4.78817e-05	64.697	57.9226	56.0678	55.0428	96.0688	79.0101	103.052	116.979
CELE_B0025.5	B0025.5	0.843773	4.8522e-05	56.8549	41.3733	60.9861	41.2821	78.6018	86.5864	93.4903	99.9636
CELE_F14H8.6	cng-1	1.00397	4.85429e-05	43.1313	62.5196	38.3622	61.4645	87.3353	74.6808	120.05	130.803
CELE_F41G3.5	F41G3.5	1.21004	4.9192e-05	24.5064	15.6299	20.6566	18.3476	39.3009	44.3755	56.3066	42.5377
CELE_C34D4.2	C34D4.2	0.954177	4.98221e-05	36.2695	24.824	33.444	22.9345	48.0344	59.5282	63.7434	55.299
CELE_F01G10.3	ech-9	1.61142	5.00148e-05	219.578	215.141	207.549	206.411	926.846	938.38	380.335	347.746
CELE_C07A9.4	ncx-6	1.02331	5.08905e-05	137.236	101.135	105.25	106.416	323.141	268.418	160.421	162.707
CELE_F44D12.3	msd-1	1.05666	5.13676e-05	44.1116	29.421	39.3458	23.8519	51.3095	75.7631	82.8664	73.3775
CELE_C14C11.1	C14C11.1	0.840455	5.36112e-05	42.1511	39.5345	47.215	29.3562	73.1433	58.4458	78.6168	72.3141
CELE_K07C6.2	cyp-35B3	2.17767	5.42351e-05	2.94077	1.83881	5.90188	4.5869	19.6504	14.0703	21.2478	13.8248
CELE_B0393.4	B0393.4	1.05308	5.42351e-05	29.4077	18.3881	29.5094	17.4302	43.6677	49.7872	50.9947	51.0452
CELE_C27D6.11	C27D6.11	0.923793	5.51125e-05	40.1906	30.3404	41.3131	28.4388	63.3181	53.0342	78.6168	70.1872
CELE_K03B8.8	K03B8.8	0.983116	5.5406e-05	53.9142	39.5345	55.0842	35.7778	104.802	82.2571	91.3655	85.0754
CELE_Y43F8C.9	Y43F8C.9	0.926477	5.62443e-05	60.776	42.2927	48.1987	47.7038	74.235	73.5985	116.863	112.725
CELE_F41E7.5	fipr-21	0.775305	5.62443e-05	997.902	1028.82	955.12	1185.25	1410.47	1495.78	2157.71	2068.4
CELE_Y43F8C.5	Y43F8C.5	0.92743	5.7246e-05	35.2893	27.5822	26.5584	26.604	61.1347	50.8695	55.2443	53.1721
CELE_ZK1037.6	ZK1037.6	0.662359	5.87949e-05	99.006	76.3107	115.087	75.2252	145.195	141.785	149.797	140.374
CELE_F59C6.6	nlp-4	1.47031	5.93727e-05	7.84206	7.35525	16.722	14.6781	37.1175	22.7289	30.8093	38.2839
CELE_C55B7.10	C55B7.10	1.34515	5.98107e-05	11.7631	15.6299	11.8038	7.33904	29.4757	22.7289	31.8717	34.0302
CELE_R11G11.12	nhr-210	1.13468	6.01041e-05	28.4275	27.5822	23.6075	20.1824	42.576	46.5402	56.3066	73.3775
CELE_T03E6.7	cpl-1	0.733569	6.07744e-05	33665	20705	34328.3	20588.8	46206.9	45292.3	45586.1	44629.5
CELE_K09B11.5	K09B11.5	1.08598	6.23484e-05	17.6446	19.3075	20.6566	18.3476	40.3926	36.7992	36.1212	47.8549
CELE_F10D11.3	F10D11.3	1.56068	6.34773e-05	8.82232	10.1135	11.8038	3.66952	22.9255	24.8936	27.6221	25.5226
CELE_Y53F4B.31	gst-28	0.739212	6.40121e-05	328.386	305.243	332.472	278.884	613.531	580.129	436.642	447.709
CELE_F08G5.5	ugt-65	1.00269	6.42612e-05	59.7957	46.8897	81.6426	49.5385	109.169	102.821	130.674	132.93
CELE_Y57G7A.6	Y57G7A.6	0.59868	6.42612e-05	80.3811	83.666	88.5282	81.6468	114.628	116.892	141.298	132.93
CELE_K08C7.1	K08C7.1	0.919209	6.48321e-05	163.703	94.6989	210.5	106.416	256.547	272.747	286.845	270.114
CELE_F44F4.4	ptr-8	0.889811	6.50437e-05	204.874	275.822	201.647	257.784	318.774	320.37	555.63	547.673
CELE_R04D3.1	cyp-14A4	1.51616	6.54603e-05	5.88154	9.19406	11.8038	9.1738	24.0172	24.8936	31.8717	22.3323
CELE_M28.6	lact-3	0.645163	6.81882e-05	926.343	1114.32	888.232	1032.97	1850.42	1747.96	1305.68	1293.15
CELE_F12A10.1	F12A10.1	0.847438	6.83744e-05	69.5983	96.5377	92.4627	139.442	170.304	148.279	199.729	198.864
CELE_T12B5.15	T12B5.15	1.04865	6.84814e-05	190.17	91.9406	174.105	85.3163	228.164	274.912	291.095	324.35
CELE_K07C5.7	ttll-15	0.788194	6.87514e-05	60.776	59.7614	43.2804	45.869	94.9772	80.0924	94.5527	92.5195
CELE_F36H1.3	F36H1.3	0.94287	7.18912e-05	33.3288	21.1463	32.4603	24.7693	57.8596	48.7049	50.9947	56.3625
CELE_C39E9.4	scl-6	0.730666	7.21627e-05	57.8352	57.9226	58.0351	71.5556	101.527	120.139	89.2407	96.7733
CELE_W04H10.4	clec-118	1.29821	7.32441e-05	10.7828	15.6299	8.85282	15.5955	31.6591	31.3876	32.9341	29.7764
CELE_F11G11.9	mpst-4	0.951686	7.42405e-05	27.4472	28.5016	42.2968	30.2735	55.6763	58.4458	78.6168	55.299
CELE_C04F5.7	ugt-63	0.723424	7.42696e-05	412.688	319.953	358.047	287.14	443.227	480.555	702.239	647.637
CELE_Y14H12A.1	Y14H12A.1	0.775112	7.45159e-05	91.1639	74.4719	95.4137	57.7949	120.086	125.55	144.485	154.199
CELE_Y39B6A.30	Y39B6A.30	0.867891	7.50518e-05	38.23	37.6957	42.2968	45.869	62.2264	63.8575	81.804	91.4561
CELE_F40H6.1	F40H6.1	1.08916	7.54339e-05	30.388	27.5822	38.3622	13.7607	57.8596	56.2812	57.369	61.6797
CELE_H27M09.5	H27M09.5	1.24467	7.57344e-05	18.6249	8.27466	19.6729	11.0086	32.7507	33.5522	38.246	30.8398
CELE_Y44A6D.5	Y44A6D.5	0.905399	7.57492e-05	31.3682	27.5822	32.4603	27.5214	53.4929	48.7049	69.0553	51.0452
CELE_C50F7.5	C50F7.5	1.25166	7.62852e-05	462.682	996.637	431.821	1029.3	1830.77	1683.02	1737.01	1704.7
CELE_B0379.7	B0379.7	0.707651	7.77814e-05	104.888	92.8601	122.956	95.4075	158.295	152.609	200.792	166.96
CELE_F08A8.4	acox-1.4	1.09659	7.7952e-05	239.183	122.281	239.026	112.838	295.848	311.711	457.89	458.344
CELE_C53D6.7	C53D6.7	0.683164	7.9334e-05	113.71	148.944	136.727	133.02	172.487	180.749	245.412	256.29
CELE_C16A11.7	C16A11.7	0.921891	7.93633e-05	29.4077	35.8569	34.4276	33.9431	54.5846	49.7872	79.6792	69.1238
CELE_F28H7.3	F28H7.3	0.943112	7.98107e-05	2708.45	2255.3	2667.65	2198.96	5517.41	5369.44	3956.34	4057.03
CELE_T11F8.4	T11F8.4	1.23025	7.9848e-05	10.7828	15.6299	22.6239	15.5955	36.0258	34.6346	36.1212	44.6646
CELE_F02E9.3	F02E9.3	0.960571	8.1656e-05	43.1313	30.3404	34.4276	23.8519	55.6763	55.1988	73.3049	71.2507
CELE_Y105C5A.25	Y105C5A.25	1.3713	8.1946e-05	10.7828	11.9523	25.5748	10.0912	33.8424	31.3876	40.3708	44.6646
CELE_F19C7.4	F19C7.4	0.814563	8.19567e-05	77.4403	61.6002	62.9534	56.8776	115.719	122.303	111.551	105.281
CELE_K11H12.4	K11H12.4	1.96174	8.23245e-05	27.4472	13.7911	24.5912	34.8604	36.0258	55.1988	165.733	135.057
CELE_C24D10.1	ptp-5.1	0.981994	8.23823e-05	23.5262	26.6628	28.5257	22.0171	49.1261	46.5402	62.681	40.4108
CELE_R13.3	best-15	0.678285	8.26699e-05	63.7167	81.8272	99.3483	78.8947	122.269	137.456	133.861	124.423
CELE_F55H12.1	snf-2	1.03452	8.32486e-05	34.309	18.3881	28.5257	17.4302	51.3095	46.5402	49.9323	53.1721
CELE_ZC376.2	cest-2.2	1.08162	8.49406e-05	249.966	106.651	275.421	134.855	420.301	419.944	409.02	372.205
CELE_F44D12.8	F44D12.8	1.16501	8.64786e-05	29.4077	20.2269	31.4767	13.7607	50.2178	55.1988	63.7434	42.5377
CELE_F13B6.2	F13B6.2	1.20278	8.85954e-05	60.776	24.824	73.7735	33.9431	104.802	96.3274	117.925	124.423
CELE_F27E5.9	F27E5.9	0.858635	8.98399e-05	40.1906	52.4062	32.4603	63.2992	85.1519	82.2571	84.9912	90.3926
CELE_F10D2.11	ugt-41	1.31627	8.99899e-05	221.538	106.651	247.879	117.425	316.591	268.418	545.006	595.528
CELE_C06A1.3	C06A1.3	0.895938	8.99899e-05	67.6378	42.2927	74.7571	42.1995	88.427	93.0804	117.925	121.232
CELE_R160.3	R160.3	1.019	9.04552e-05	29.4077	17.4687	30.493	24.7693	41.4843	57.3635	57.369	49.9818
CELE_C47B2.8	prx-11	0.750575	9.05605e-05	260.748	214.222	228.206	209.163	447.593	464.32	307.031	315.842
CELE_Y105C5B.18	Y105C5B.18	0.97593	9.24869e-05	28.4275	18.3881	26.5584	22.0171	46.9427	41.1286	48.8699	49.9818
CELE_R09A1.2	pei-2	0.726972	9.32865e-05	64.697	56.0838	62.9534	45.869	76.4184	104.986	106.239	91.4561
CELE_C09G5.5	col-80	1.6614	9.33068e-05	15826.3	3929.54	15846.5	3928.22	30041.2	28939.3	33314.4	32747.7
CELE_K10B3.9	mai-1	0.633059	9.36469e-05	148.999	116.765	135.743	125.681	170.304	174.255	224.164	247.782
CELE_T12A7.4	lips-5	0.64473	9.46237e-05	82.3416	84.5854	60.9861	84.399	124.453	115.809	125.362	123.359
CELE_F16F9.2	dpy-6	0.866019	9.48629e-05	39.2103	39.5345	33.444	38.53	61.1347	54.1165	75.4297	84.012
CELE_C45E5.4	cpg-18	0.657002	9.73963e-05	101.947	92.8601	75.7408	88.9859	116.811	137.456	144.485	168.024
CELE_F36G9.12	oac-20	1.30706	9.83515e-05	75.4798	34.018	101.316	34.8604	164.845	143.95	147.672	149.945
CELE_C49G7.8	cyp-35A4	0.926049	9.83582e-05	202.913	200.431	218.369	187.146	412.659	450.249	353.776	320.096
CELE_R04A9.9	R04A9.9	1.05204	0.000100367	29.4077	24.824	40.3295	23.8519	43.6677	63.8575	66.9305	70.1872
CELE_AH10.1	acs-10	0.773591	0.000102113	95.085	71.7137	88.5282	58.7123	110.261	125.55	162.546	137.184
CELE_C54D10.1	cdr-2	0.811573	0.000102997	239.183	366.843	252.797	377.043	515.278	414.533	648.058	592.338
CELE_T28C12.3	fbxa-202	1.21725	0.000103359	22.5459	10.1135	16.722	13.7607	31.6591	31.3876	45.6828	37.2205
CELE_T21E8.1	pgp-6	1.29592	0.000103436	59.7957	60.6808	75.7408	86.2337	97.1605	116.892	243.287	236.084
CELE_Y59E9AR.7	Y59E9AR.7	1.70669	0.000103553	10.7828	5.51644	4.91823	4.5869	17.4671	22.7289	26.5597	17.0151
CELE_F41H10.1	F41H10.1	0.708081	0.000105807	183.308	151.702	180.991	173.385	255.456	208.89	328.278	332.858
CELE_C37H5.14	C37H5.14	1.00054	0.000106324	17.6446	26.6628	25.5748	22.9345	44.7593	50.8695	41.4332	48.9184
CELE_C10A4.4	C10A4.4	0.999182	0.000106324	30.388	20.2269	22.6239	17.4302	45.851	42.2109	48.8699	43.6011
CELE_T06E4.12	idpc-3	0.870852	0.000106725	53.9142	57.0032	51.1496	63.2992	98.2522	93.0804	110.489	110.598
CELE_F20H11.4	F20H11.4	0.912535	0.000108324	49.0129	28.5016	49.1823	30.2735	61.1347	69.2691	80.7416	82.9485
CELE_T20B3.7	phy-3	1.05969	0.000108924	28.4275	22.0658	18.6893	21.0997	34.9341	59.5282	43.558	49.9818
CELE_C30B5.3	cpb-2	0.846705	0.000110975	46.0721	35.8569	48.1987	40.3647	62.2264	70.3515	79.6792	93.5829
CELE_C16C8.18	C16C8.18	0.865164	0.000116422	41.1708	40.4539	43.2804	33.9431	74.235	58.4458	80.7416	75.5044
CELE_F36H12.5	F36H12.5	1.13998	0.000120962	31.3682	18.3881	24.5912	13.7607	40.3926	38.9639	53.1195	60.6162
CELE_F53G12.6	spe-8	0.981247	0.000120962	25.4867	19.3075	29.5094	22.9345	54.5846	48.7049	41.4332	46.7915
CELE_C25D7.5	C25D7.5	0.648082	0.000121091	58.8154	63.439	59.0188	71.5556	108.077	103.904	92.4279	92.5195
CELE_Y105E8A.27	Y105E8A.27	0.900838	0.000121117	25.4867	31.2598	48.1987	38.53	64.4098	80.0924	66.9305	56.3625
CELE_B0495.4	nhx-2	0.635754	0.000121228	917.521	1085.82	1035.78	1021.96	1700.86	1760.95	1409.79	1438.84
CELE_D2063.4	irld-1	1.11284	0.000124348	12.7433	25.7434	18.6893	14.6781	38.2092	34.6346	44.6204	38.2839
CELE_T10B9.7	cyp-13A2	1.1077	0.0001246	65.6773	45.0509	61.9697	36.6952	86.2436	84.4218	148.735	130.803
CELE_ZK180.6	ZK180.6	0.864792	0.000125529	364.656	438.557	339.358	492.633	544.754	564.976	951.901	916.687
CELE_D2024.2	afmd-1	0.751993	0.000125987	46.0721	49.6479	52.1332	50.4559	75.3267	70.3515	93.4903	94.6464
CELE_T02E1.7	T02E1.7	1.05901	0.000126902	18.6249	25.7434	22.6239	22.0171	31.6591	44.3755	50.9947	58.4893
CELE_C24G7.2	acd-1	2.73044	0.000127003	1.96051	1.83881	1.96729	1.83476	7.64184	8.65864	19.123	14.8882
CELE_T02B11.4	T02B11.4	0.60596	0.000128837	188.209	255.595	203.615	244.023	343.883	359.334	324.029	330.731
CELE_F20D6.6	F20D6.6	0.865627	0.000130452	33.3288	37.6957	40.3295	30.2735	62.2264	56.2812	83.9288	55.299
CELE_ZC190.1	cln-3.3	0.619658	0.000131708	227.42	270.305	227.222	262.371	442.135	431.85	325.091	319.033
CELE_F43C1.5	F43C1.5	1.26469	0.000136002	38.23	20.2269	43.2804	15.5955	76.4184	70.3515	66.9305	66.9969
CELE_F36H9.4	F36H9.4	0.796497	0.000137064	76.4601	47.8091	75.7408	61.4645	106.986	91.9981	127.487	126.55
CELE_Y19D10B.6	Y19D10B.6	1.42947	0.000141223	17.6446	12.8717	20.6566	17.4302	38.2092	29.2229	71.1801	45.728
CELE_D1081.5	D1081.5	1.01375	0.000143753	25.4867	22.9852	18.6893	16.5128	41.4843	42.2109	39.3084	45.728
CELE_F53A9.7	F53A9.7	0.681819	0.000145575	87.2429	134.233	102.299	151.368	168.12	191.572	199.729	204.181
CELE_C32E12.1	C32E12.1	0.893213	0.000146591	31.3682	30.3404	43.2804	55.0428	60.043	81.1748	80.7416	75.5044
CELE_W05E10.1	W05E10.1	0.744101	0.000147201	49.0129	52.4062	53.1169	43.1169	70.9599	76.8455	89.2407	93.5829
CELE_F44G4.5	F44G4.5	1.30974	0.000147363	10.7828	10.1135	14.7547	9.1738	26.2006	32.4699	20.1854	31.9033
CELE_ZK970.8	ZK970.8	1.33545	0.000148183	13.7236	4.59703	11.8038	11.0086	25.1089	28.1406	25.4973	24.4592
CELE_W05E7.1	grd-3	1.13108	0.000148287	1462.54	610.486	1370.22	612.81	2037.1	2184.14	2367	2293.85
CELE_T26H5.4	T26H5.4	1.13889	0.000148421	12.7433	23.9046	13.771	24.7693	39.3009	41.1286	52.0571	34.0302
CELE_H06H21.9	mpz-4	0.999794	0.000149067	29.4077	21.1463	26.5584	22.0171	41.4843	56.2812	50.9947	48.9184
CELE_F22B8.1	srj-29	1.76889	0.00015183	5.88154	5.51644	3.93458	7.33904	29.4757	19.4819	13.8111	14.8882
CELE_T22B3.3	T22B3.3	0.947273	0.000152753	51.9536	30.3404	33.444	45.869	74.235	59.5282	91.3655	86.1388
CELE_K08D10.7	scrm-8	1.1483	0.000154183	12.7433	19.3075	27.5421	14.6781	31.6591	41.1286	50.9947	40.4108
CELE_F46G10.6	mxl-3	1.27999	0.000156494	250.946	113.087	240.993	111.003	298.032	304.135	562.004	573.196
CELE_F59A7.2	F59A7.2	1.16881	0.000156557	31.3682	41.3733	27.5421	31.1909	46.9427	63.8575	87.1159	97.8367
CELE_Y54G2A.47	pudl-2	1.00974	0.000161221	23.5262	24.824	16.722	23.8519	39.3009	45.4579	37.1836	57.4259
CELE_C28D4.7	C28D4.7	0.939453	0.000161967	25.4867	34.018	36.3949	22.9345	46.9427	54.1165	65.8682	60.6162
CELE_E02H9.3	E02H9.3	0.589623	0.000164687	861.646	618.761	824.295	550.428	1022.91	1200.3	1048.58	1023.03
CELE_F11G11.1	gst-8	2.42905	0.000165369	4.90129	5.51644	4.91823	5.50428	33.8424	55.1988	10.6239	12.7613
CELE_M02B1.4	M02B1.4	0.880089	0.000167319	32.3485	26.6628	36.3949	27.5214	46.9427	66.0221	50.9947	61.6797
CELE_C36F7.5	C36F7.5	1.0682	0.000167992	16.6644	18.3881	19.6729	27.5214	32.7507	41.1286	48.8699	49.9818
CELE_K09C4.5	K09C4.5	1.2123	0.000169552	152.92	63.439	148.531	60.5471	239.08	243.524	249.662	252.036
CELE_ZK546.11	gst-30	1.27269	0.000170865	16.6644	11.9523	12.7874	14.6781	33.8424	29.2229	46.7451	25.5226
CELE_C09B9.4	C09B9.4	0.887788	0.000170961	39.2103	38.6151	60.9861	31.1909	61.1347	87.6688	84.9912	79.7582
CELE_C04G6.2	C04G6.2	1.26148	0.000171147	19.6051	17.4687	24.5912	13.7607	37.1175	34.6346	47.8075	60.6162
CELE_F32B5.1	F32B5.1	0.838103	0.000171301	93.1245	50.5674	79.6753	57.7949	114.628	102.821	145.547	138.248
CELE_C27C7.1	C27C7.1	0.647598	0.000171324	1926.21	1300.04	2033.2	1435.7	3079.66	2661.45	2392.5	2353.4
CELE_C04E6.7	C04E6.7	0.618683	0.000171438	99.9863	91.9406	78.6917	76.1425	132.095	149.362	125.362	125.486
CELE_F37B1.5	gst-16	0.916359	0.000174266	62.7365	40.4539	58.0351	52.2907	103.711	123.386	66.9305	108.471
CELE_K08F4.5	K08F4.5	1.00633	0.000179813	30.388	31.2598	42.2968	26.604	45.851	54.1165	80.7416	80.8216
CELE_C02F5.5	C02F5.5	0.776358	0.00018034	54.8944	56.0838	71.8062	44.0342	79.6935	101.739	105.177	101.027
CELE_ZC373.6	dao-4	1.28139	0.000181676	36.2695	17.4687	45.2477	21.0997	54.5846	67.1045	89.2407	79.7582
CELE_W03F11.4	W03F11.4	0.727461	0.000182972	86.2627	80.9078	120.005	83.4816	122.269	140.703	190.168	159.516
CELE_F36D3.5	F36D3.5	1.09684	0.000184231	18.6249	16.5493	22.6239	21.0997	40.3926	29.2229	48.8699	49.9818
CELE_C34F11.6	msp-49	0.795072	0.000186704	363.676	226.174	329.521	211.915	533.837	432.932	543.943	450.9
CELE_ZC47.14	fbxa-37	0.856301	0.000187779	49.0129	54.245	27.5421	52.2907	94.9772	82.2571	72.2425	82.9485
CELE_F15B9.2	far-4	2.18466	0.000198268	7.84206	1.83881	7.86917	0.91738	21.8338	20.5643	18.0606	22.3323
CELE_C06A8.6	C06A8.6	0.820975	0.000202164	59.7957	64.3585	66.8879	46.7864	97.1605	79.0101	121.112	122.296
CELE_ZK512.8	ZK512.8	0.78024	0.000208518	63.7167	36.7763	61.9697	47.7038	82.9685	79.0101	91.3655	106.344
CELE_M04C9.3	M04C9.3	0.586823	0.000210125	93.1245	83.666	81.6426	75.2252	126.636	107.151	130.674	136.121
CELE_C27B7.6	C27B7.6	1.00467	0.000211418	16.6644	21.1463	20.6566	16.5128	33.8424	38.9639	38.246	39.3474
CELE_F44F1.3	clp-8	1.10666	0.000211966	19.6051	20.2269	14.7547	13.7607	32.7507	33.5522	42.4956	38.2839
CELE_Y82E9BL.10	fbxa-14	0.783454	0.000211966	46.0721	66.1973	47.215	65.134	79.6935	86.5864	109.426	111.661
CELE_Y45F10C.4	Y45F10C.4	1.01349	0.00021345	446.997	223.416	441.657	211.915	603.705	606.105	745.797	715.697
CELE_Y57G7A.1	Y57G7A.1	0.757901	0.000214162	55.8747	45.9703	37.3786	53.208	80.7852	77.9278	83.9288	82.9485
CELE_ZK354.8	ZK354.8	0.685822	0.000214747	68.618	54.245	63.937	49.5385	92.7938	90.9157	109.426	86.1388
CELE_C14A6.6	C14A6.6	1.26369	0.000216263	20.5854	11.9523	10.8201	10.0912	29.4757	32.4699	27.6221	38.2839
CELE_F11E6.3	epic-1	0.909024	0.000217351	6980.41	3448.69	7330.13	3619.98	9324.14	9133.79	10782.2	10903.5
CELE_Y57A10B.3	btb-14	0.649982	0.000218597	137.236	112.168	170.171	145.863	221.613	209.972	223.102	231.83
CELE_F20H11.3	mdh-2	0.601115	0.000221682	12916.9	8322.47	12335.9	8338.98	16009.7	16189.5	15845.5	15532.6
CELE_W06A7.5	nspa-8	0.873516	0.000222497	38.23	34.018	44.2641	32.1083	61.1347	61.6928	70.1177	78.6947
CELE_C05C9.3	C05C9.3	0.920105	0.000226807	67.6378	38.6151	42.2968	40.3647	85.1519	89.8334	96.6774	85.0754
CELE_Y26D4A.3	Y26D4A.3	1.93641	0.000232498	5.88154	10.1135	4.91823	8.25642	34.9341	42.2109	19.123	15.9516
CELE_C48B6.4	C48B6.4	1.08915	0.000234909	19.6051	22.9852	27.5421	19.265	33.8424	44.3755	55.2443	56.3625
CELE_F11E6.5	elo-2	0.82844	0.000235806	3026.05	1654.93	2851.59	1887.97	4320.91	4092.29	4195.38	4118.71
CELE_C25A8.5	C25A8.5	0.96068	0.000240816	30.388	18.3881	29.5094	22.0171	48.0344	38.9639	59.4938	47.8549
CELE_C26F1.2	cyp-32A1	0.736431	0.000243314	109.789	173.768	120.005	169.715	206.33	203.478	264.535	281.812
CELE_ZK484.7	ZK484.7	0.957579	0.000249151	29.4077	34.9374	21.6402	17.4302	48.0344	42.2109	55.2443	55.299
CELE_F17C8.7	F17C8.7	0.747108	0.000255352	56.8549	48.7285	54.1005	40.3647	74.235	75.7631	95.6151	89.3292
CELE_F40F9.3	F40F9.3	0.785308	0.000255408	51.9536	49.6479	63.937	32.1083	82.9685	88.7511	93.4903	74.441
CELE_R11E3.1	R11E3.1	0.740393	0.000255786	66.6575	56.0838	70.8225	50.4559	85.1519	85.5041	116.863	119.106
CELE_F49E12.9	drd-1	1.18295	0.000256318	340.149	134.233	271.486	161.459	390.826	364.745	697.99	605.099
CELE_F58D2.2	F58D2.2	0.646931	0.000262922	103.907	79.069	102.299	84.399	137.553	133.127	169.982	137.184
CELE_C50F4.2	pfk-1.2	0.762138	0.000267019	37.2498	35.8569	50.166	36.6952	66.5932	58.4458	70.1177	75.5044
CELE_F56H11.3	elo-7	1.35813	0.000269952	13.7236	11.9523	13.771	6.42166	24.0172	30.3052	31.8717	30.8398
CELE_C46E10.1	C46E10.1	1.07613	0.00027285	42.1511	33.0986	37.3786	14.6781	60.043	69.2691	83.9288	54.2356
CELE_F55D12.6	F55D12.6	0.96359	0.000273832	45.0918	21.1463	30.493	29.3562	72.0516	50.8695	61.6186	60.6162
CELE_Y51H7BM.1	math-45	0.591345	0.000284187	108.809	82.7466	113.119	81.6468	157.204	159.103	135.986	128.677
CELE_C34C12.9	C34C12.9	0.734867	0.000284648	62.7365	50.5674	55.0842	39.4473	82.9685	97.4097	77.5544	87.2023
CELE_F10D11.5	F10D11.5	1.1242	0.000284769	27.4472	11.0329	25.5748	20.1824	55.6763	38.9639	54.1819	34.0302
CELE_T05F1.8	T05F1.8	0.812259	0.000290745	49.9931	27.5822	56.0678	48.6211	87.3353	68.1868	83.9288	79.7582
CELE_F59E11.7	F59E11.7	1.21897	0.000291059	22.5459	39.5345	27.5421	33.9431	45.851	48.7049	110.489	82.9485
CELE_ZC376.8	ZC376.8	0.889085	0.000291476	27.4472	33.0986	22.6239	22.9345	56.768	44.3755	47.8075	47.8549
CELE_Y67D8C.8	cpg-9	1.36025	0.000309338	331.327	106.651	278.372	97.2423	457.419	438.344	639.559	551.927
CELE_E03A3.4	his-70	1.3781	0.000315153	10.7828	11.0329	9.83646	20.1824	22.9255	34.6346	42.4956	35.0936
CELE_T25B9.6	T25B9.6	0.850961	0.000315699	34.309	36.7763	43.2804	29.3562	63.3181	47.6225	72.2425	75.5044
CELE_K02F6.3	K02F6.3	0.737042	0.000342955	60.776	40.4539	53.1169	54.1254	77.5101	81.1748	108.364	79.7582
CELE_F15A2.2	tre-4	0.598697	0.000344382	102.927	116.765	82.6263	109.168	124.453	160.185	164.67	174.405
CELE_C34G6.3	C34G6.3	1.00091	0.000352624	21.5657	18.3881	23.6075	15.5955	37.1175	31.3876	37.1836	52.1087
CELE_T26H5.14	T26H5.14	0.858889	0.000352624	34.309	56.0838	28.5257	48.6211	60.043	80.0924	78.6168	86.1388
CELE_M02D8.2	M02D8.2	0.940286	0.000354221	45.0918	23.9046	33.444	25.6866	55.6763	61.6928	60.5562	66.9969
CELE_F57G8.6	nhr-193	0.630225	0.000362014	58.8154	64.3585	60.9861	62.3818	114.628	94.1627	87.1159	86.1388
CELE_ZK673.9	clec-143	1.43787	0.000364708	8.82232	9.19406	6.88552	9.1738	30.5674	18.3996	21.2478	22.3323
CELE_C54G4.3	C54G4.3	0.917026	0.000365063	34.309	18.3881	30.493	19.265	49.1261	46.5402	48.8699	47.8549
CELE_F28F5.6	F28F5.6	0.742026	0.000365877	64.697	63.439	59.0188	63.2992	89.5187	110.398	122.175	96.7733
CELE_F22F7.1	ldp-1	0.738599	0.000371821	4433.7	2493.43	4253.29	2365.01	5473.74	5502.57	5631.73	5991.44
CELE_D1054.8	D1054.8	0.655716	0.000372039	169.585	126.878	190.827	125.681	234.714	195.902	256.036	277.559
CELE_Y71G12B.2	Y71G12B.2	1.49049	0.000383913	3.92103	11.9523	10.8201	9.1738	33.8424	21.6466	25.4973	20.2054
CELE_Y47D3A.11	wht-8	0.954478	0.000383928	31.3682	35.8569	27.5421	23.8519	53.4929	51.9519	52.0571	72.3141
CELE_F46A8.10	scrm-6	1.04113	0.000384647	18.6249	18.3881	17.7056	13.7607	28.384	34.6346	44.6204	32.9667
CELE_K08C9.1	K08C9.1	1.06876	0.000386051	44.1116	22.9852	21.6402	14.6781	57.8596	48.7049	54.1819	55.299
CELE_B0213.5	nlp-30	0.982637	0.000388171	55.8747	72.6331	49.1823	58.7123	96.0688	80.0924	160.421	130.803
CELE_Y113G7C.1	Y113G7C.1	0.631468	0.000390486	149.979	134.233	151.482	134.855	195.413	178.584	253.911	255.226
CELE_C35E7.10	C35E7.10	0.665663	0.000392195	94.1047	63.439	84.5936	67.8861	101.527	116.892	130.674	141.438
CELE_C18E9.8	C18E9.8	0.914251	0.000397943	36.2695	29.421	24.5912	23.8519	48.0344	49.7872	58.4314	58.4893
CELE_C08F8.6	C08F8.6	0.654052	0.000403831	57.8352	62.5196	67.8716	52.2907	91.7021	77.9278	99.8646	108.471
CELE_K09F6.3	K09F6.3	0.736535	0.000407729	99.006	70.7943	74.7571	65.134	111.353	108.233	139.173	156.326
CELE_F27C1.3	F27C1.3	1.16383	0.000412288	18.6249	11.9523	18.6893	12.8433	33.8424	29.2229	38.246	37.2205
CELE_C33A12.6	ugt-21	0.805161	0.000417231	74.4996	102.974	100.332	78.8947	116.811	137.456	177.419	191.42
CELE_C10H11.4	ugt-28	0.627501	0.00041751	177.427	125.039	200.664	119.259	241.264	240.277	229.476	248.846
CELE_F07F6.1	F07F6.1	0.803631	0.000417833	39.2103	33.0986	35.4113	37.6126	52.4012	69.2691	71.1801	60.6162
CELE_F26A1.3	F26A1.3	1.22606	0.000419969	11.7631	15.6299	15.7383	12.8433	26.2006	27.0583	33.9965	43.6011
CELE_ZK858.8	ZK858.8	0.978815	0.000424455	37.2498	18.3881	27.5421	26.604	43.6677	41.1286	61.6186	69.1238
CELE_Y40B10A.7	comt-5	1.6212	0.000426297	16.6644	13.7911	16.722	13.7607	17.4671	35.7169	70.1177	63.8066
CELE_R166.1	mab-10	0.695272	0.000426297	272.512	173.768	267.552	155.955	355.891	334.44	366.524	349.873
CELE_ZK742.4	ZK742.4	0.765279	0.000428114	103.907	168.251	111.152	186.228	221.613	202.396	285.783	259.48
CELE_C11H1.5	C11H1.5	1.70137	0.00042926	16.6644	8.27466	15.7383	13.7607	26.2006	25.9759	58.4314	65.9334
CELE_C45G9.12	C45G9.12	1.071	0.000438758	22.5459	16.5493	26.5584	11.0086	41.4843	37.8816	40.3708	40.4108
CELE_F08H9.15	F08H9.15	1.22263	0.000444469	6.8618	13.7911	13.771	13.7607	22.9255	29.2229	25.4973	35.0936
CELE_C45B2.8	C45B2.8	2.33099	0.00045524	4.90129	0	1.96729	3.66952	14.192	10.8233	15.9358	11.6979
CELE_K01D12.15	K01D12.15	0.871255	0.00045544	36.2695	30.3404	43.2804	21.0997	61.1347	62.7752	58.4314	56.3625
CELE_F09F3.9	cpt-5	0.885979	0.000457577	199.973	111.248	167.22	107.333	287.115	252.183	274.097	267.988
CELE_Y34F4.4	Y34F4.4	0.761383	0.000465745	40.1906	34.9374	34.4276	39.4473	53.4929	77.9278	67.9929	53.1721
CELE_C05C12.1	C05C12.1	0.963744	0.000468636	21.5657	19.3075	20.6566	17.4302	48.0344	31.3876	40.3708	34.0302
CELE_Y46G5A.25	snf-4	1.7208	0.000469036	5.88154	5.51644	2.95094	6.42166	12.0086	18.3996	20.1854	18.0785
CELE_F54D1.1	F54D1.1	0.92013	0.000469425	34.309	27.5822	20.6566	24.7693	51.3095	35.7169	54.1819	61.6797
CELE_F54D11.1	pmt-2	0.927647	0.000473371	6236.4	2943.02	6181.23	2928.28	7735.73	7713.77	9794.17	9543.33
CELE_Y87G2A.14	ndx-8	0.588366	0.000474617	62.7365	67.1167	66.8879	73.3904	112.444	108.233	97.7398	88.2657
CELE_Y47G6A.26	Y47G6A.26	0.934758	0.000479562	26.467	20.2269	29.5094	22.9345	33.8424	50.8695	53.1195	51.0452
CELE_ZK829.2	hdl-1	1.1551	0.000482316	22.5459	19.3075	24.5912	11.0086	36.0258	42.2109	42.4956	51.0452
CELE_K01H12.2	ant-1.3	0.72371	0.000486721	109.789	67.1167	113.119	76.1425	132.095	133.127	175.294	162.707
CELE_ZK1225.4	ZK1225.4	0.797608	0.000490382	40.1906	44.1315	36.3949	24.7693	65.5015	62.7752	55.2443	69.1238
CELE_K07F5.6	K07F5.6	1.18871	0.000495016	15.6841	12.8717	13.771	14.6781	22.9255	27.0583	37.1836	42.5377
CELE_C25A8.2	C25A8.2	1.16396	0.000496607	11.7631	12.8717	12.7874	11.0086	22.9255	22.7289	32.9341	29.7764
CELE_C18H7.7	C18H7.7	1.12584	0.000512264	16.6644	10.1135	14.7547	12.8433	33.8424	23.8113	25.4973	35.0936
CELE_Y69A2AR.12	Y69A2AR.12	0.848111	0.000513005	23.5262	32.1792	35.4113	31.1909	53.4929	54.1165	57.369	55.299
CELE_R13H9.1	rmd-6	1.09766	0.000513359	30.388	19.3075	24.5912	11.0086	51.3095	36.7992	41.4332	52.1087
CELE_F15B9.6	F15B9.6	1.94806	0.000517305	6.8618	7.35525	4.91823	3.66952	19.6504	10.8233	29.7469	27.6495
CELE_F15A2.5	efn-3	1.43	0.000518639	51.9536	18.3881	54.1005	17.4302	111.353	107.151	94.5527	68.0603
CELE_C18H7.4	C18H7.4	0.899049	0.000524433	31.3682	34.018	30.493	28.4388	41.4843	54.1165	81.804	54.2356
CELE_F49C5.11	F49C5.11	2.06359	0.000525823	4.90129	4.59703	3.93458	5.50428	13.1003	9.74097	30.8093	25.5226
CELE_ZK1248.5	ZK1248.5	0.91473	0.000536243	32.3485	21.1463	30.493	22.9345	39.3009	56.2812	48.8699	56.3625
CELE_F36H1.5	hrg-4	1.14911	0.000548782	27.4472	14.7105	32.4603	22.9345	46.9427	36.7992	58.4314	73.3775
CELE_ZK1290.6	rnh-1.1	0.999913	0.000561598	56.8549	26.6628	59.0188	29.3562	81.8769	66.0221	99.8646	94.6464
CELE_F11G11.4	F11G11.4	0.821564	0.00056265	29.4077	30.3404	40.3295	26.604	51.3095	45.4579	63.7434	62.7431
CELE_W06D4.2	spe-46	0.705342	0.000566608	49.0129	42.2927	61.9697	57.7949	80.7852	84.4218	80.7416	97.8367
CELE_F55F8.7	F55F8.7	0.886604	0.000570858	34.309	30.3404	34.4276	26.604	60.043	37.8816	70.1177	63.8066
CELE_C45G7.2	ilys-2	0.999259	0.000582461	25.4867	23.9046	31.4767	21.0997	67.6849	49.7872	39.3084	46.7915
CELE_F02H6.6	F02H6.6	3.80412	0.000582851	0.980257	0.919406	0.983646	0	17.4671	5.41165	7.43673	9.57098
CELE_F11C1.3	scav-4	0.685838	0.000586508	331.327	306.162	287.225	297.231	592.788	583.376	398.396	391.347
CELE_C01G10.1	C01G10.1	1.25514	0.000589322	12.7433	9.19406	9.83646	11.9259	19.6504	33.5522	25.4973	25.5226
CELE_ZK6.8	ZK6.8	0.693897	0.000589439	120.572	150.783	107.217	178.889	256.547	256.512	198.667	191.42
CELE_F57A8.8	fipr-13	0.829921	0.000603841	71.5588	48.7285	65.9043	51.3733	81.8769	80.0924	143.423	115.915
CELE_C47E12.11	C47E12.11	1.08707	0.000610372	20.5854	13.7911	18.6893	11.0086	39.3009	29.2229	31.8717	35.0936
CELE_M70.1	M70.1	0.875438	0.000617374	22.5459	24.824	31.4767	31.1909	38.2092	54.1165	46.7451	62.7431
CELE_R05F9.5	gst-9	1.34704	0.000633762	12.7433	9.19406	18.6893	7.33904	27.2923	21.6466	41.4332	30.8398
CELE_F26G1.2	F26G1.2	0.943177	0.000637765	62.7365	138.83	60.9861	107.333	147.378	150.444	202.916	211.625
CELE_T22H9.3	wago-10	0.944432	0.000638585	34.309	28.5016	36.3949	29.3562	66.5932	40.0462	63.7434	76.5679
CELE_E01A2.7	poml-2	0.716342	0.000647308	96.0652	73.5525	107.217	60.5471	134.278	114.727	160.421	143.565
CELE_F47B3.4	F47B3.4	1.08591	0.000648674	25.4867	15.6299	14.7547	15.5955	24.0172	38.9639	40.3708	47.8549
CELE_C32E8.4	C32E8.4	0.955161	0.000648761	25.4867	27.5822	27.5421	25.6866	34.9341	50.8695	55.2443	64.87
CELE_C46G7.4	pqn-22	0.620866	0.000649601	1807.59	1333.14	1831.55	1384.33	2174.65	2038.03	2791.96	2769.2
CELE_C10A4.6	C10A4.6	1.3686	0.000655025	9.80257	8.27466	14.7547	7.33904	27.2923	28.1406	18.0606	29.7764
CELE_B0213.3	nlp-28	0.674258	0.000664635	1125.34	876.194	1084.96	909.124	1439.94	1371.31	1762.5	1801.47
CELE_C49G9.1	mec-19	0.996589	0.000669426	21.5657	16.5493	18.6893	15.5955	39.3009	40.0462	32.9341	31.9033
CELE_F58G6.9	chca-1	0.827645	0.000681102	122.532	101.135	126.89	94.4901	165.937	130.962	232.663	259.48
CELE_T19H12.11	ugt-10	1.27946	0.000682259	21.5657	13.7911	12.7874	11.0086	40.3926	50.8695	29.7469	22.3323
CELE_B0252.5	B0252.5	0.943784	0.000688708	40.1906	28.5016	39.3458	20.1824	48.0344	49.7872	81.804	65.9334
CELE_F53G12.8	F53G12.8	0.916493	0.000702015	31.3682	20.2269	15.7383	26.604	45.851	41.1286	41.4332	48.9184
CELE_C23H5.15	C23H5.15	0.971031	0.000716772	45.0918	19.3075	35.4113	26.604	51.3095	48.7049	69.0553	77.6313
CELE_C34F11.2	C34F11.2	1.13108	0.000726727	26.467	25.7434	17.7056	31.1909	29.4757	45.4579	77.5544	69.1238
CELE_F11H8.3	col-8	1.07249	0.000726735	13546.2	5419.9	13716.9	5259.34	19372.1	19434.3	20324.6	20662.7
CELE_F42G4.2	F42G4.2	0.950872	0.000740476	30.388	30.3404	34.4276	26.604	49.1261	51.9519	76.492	57.4259
CELE_F58D5.7	F58D5.7	0.88523	0.000741433	52.9339	32.1792	50.166	32.1083	73.1433	64.9398	91.3655	78.6947
CELE_F59A3.8	F59A3.8	1.00115	0.000762905	17.6446	21.1463	24.5912	19.265	39.3009	25.9759	47.8075	52.1087
CELE_F46B3.4	ttr-12	1.2733	0.000766869	17.6446	21.1463	4.91823	14.6781	24.0172	36.7992	39.3084	41.4743
CELE_Y116A8C.23	Y116A8C.23	0.927901	0.000782948	27.4472	22.0658	17.7056	16.5128	34.9341	42.2109	39.3084	42.5377
CELE_ZK930.4	ZK930.4	0.912647	0.000784141	19.6051	22.0658	22.6239	20.1824	38.2092	35.7169	49.9323	35.0936
CELE_C25E10.5	C25E10.5	0.763965	0.000784349	76.4601	66.1973	79.6753	67.8861	100.436	91.9981	145.547	154.199
CELE_C17C3.1	C17C3.1	0.879752	0.00079202	489.148	257.434	492.807	268.792	565.496	560.647	824.414	823.105
CELE_Y59E9AR.1	Y59E9AR.1	1.31154	0.000796704	13.7236	17.4687	9.83646	14.6781	36.0258	30.3052	31.8717	40.4108
CELE_F46C5.10	F46C5.10	0.603275	0.000798159	102.927	82.7466	99.3483	76.1425	129.911	117.974	167.858	131.867
CELE_Y34D9A.11	spp-23	1.0787	0.000805558	551.885	567.274	593.139	490.798	1463.96	1634.32	813.79	741.219
CELE_C54G4.2	C54G4.2	1.07786	0.000807232	20.5854	14.7105	18.6893	18.3476	27.2923	36.7992	36.1212	52.1087
CELE_F47G4.7	smd-1	0.848588	0.000813066	3038.8	1588.73	3115.21	1643.95	3856.95	3934.27	4562.96	4547.28
CELE_Y53F4B.11	Y53F4B.11	0.959974	0.000822471	54.8944	33.0986	35.4113	21.0997	58.9513	63.8575	82.8664	74.441
CELE_F11A5.12	stdh-2	0.97563	0.000831502	19.6051	16.5493	18.6893	21.0997	27.2923	43.2932	39.3084	39.3474
CELE_F53B6.7	F53B6.7	0.79768	0.000837317	43.1313	40.4539	49.1823	33.0257	56.768	59.5282	76.492	94.6464
CELE_W03F11.3	dct-9	1.09929	0.000849486	14.7039	13.7911	14.7547	11.0086	22.9255	29.2229	28.6845	35.0936
CELE_Y51H4A.25	Y51H4A.25	0.693417	0.000856201	77.4403	129.636	81.6426	109.168	183.404	181.831	132.799	146.755
CELE_C43G2.3	C43G2.3	0.843891	0.000859433	36.2695	22.0658	23.6075	26.604	48.0344	37.8816	54.1819	54.2356
CELE_F46E10.1	acs-1	0.630885	0.000864794	1796.81	1109.72	1939.75	1121.04	2305.65	2288.05	2269.26	2375.73
CELE_F54H5.2	F54H5.2	1.04862	0.00086715	12.7433	14.7105	17.7056	24.7693	28.384	41.1286	40.3708	35.0936
CELE_F13A7.11	F13A7.11	0.813352	0.000874435	34.309	43.2121	26.5584	32.1083	63.3181	64.9398	61.6186	49.9818
CELE_C33F10.8	C33F10.8	0.933336	0.000875167	22.5459	15.6299	24.5912	20.1824	33.8424	41.1286	49.9323	32.9667
CELE_K07H8.6	vit-6	0.59455	0.000893634	424577	279386	469973	293752	588046	564274	524993	538897
CELE_W05B2.5	col-93	1.45796	0.000896815	17566.2	4292.71	17425.3	4224.54	27936.4	27544.2	32033.2	32011.7
CELE_R03G8.6	R03G8.6	0.86975	0.000906176	651.871	313.518	613.795	308.24	969.422	914.569	723.487	840.12
CELE_R102.10	R102.10	1.11024	0.000911845	18.6249	12.8717	10.8201	10.0912	22.9255	32.4699	27.6221	29.7764
CELE_Y59H11AR.4	Y59H11AR.4	0.593707	0.000922011	130.374	93.7795	129.841	87.1511	167.029	177.502	154.046	165.897
CELE_AH6.3	AH6.3	1.09697	0.000934574	15.6841	12.8717	9.83646	12.8433	27.2923	25.9759	24.435	31.9033
CELE_F10A3.2	fbxa-88	2.54319	0.000950928	0.980257	1.83881	1.96729	1.83476	8.73353	11.9056	7.43673	10.6344
CELE_T05C12.1	T05C12.1	0.771089	0.000951559	44.1116	39.5345	38.3622	23.8519	65.5015	58.4458	53.1195	71.2507
CELE_C18G1.9	C18G1.9	0.951125	0.000957406	28.4275	12.8717	26.5584	19.265	33.8424	43.2932	45.6828	44.6646
CELE_K03A1.5	sur-5	0.754044	0.000969535	1519.4	886.308	1581.7	852.246	1757.62	1767.45	2268.2	2367.22
CELE_F56A4.3	F56A4.3	0.927586	0.000972896	212.716	148.024	206.566	117.425	397.376	403.709	239.038	261.607
CELE_Y39B6A.24	asp-17	1.10895	0.000987932	63.7167	31.2598	41.3131	23.8519	73.1433	72.5161	107.301	91.4561
CELE_ZC47.13	fbxa-50	1.85807	0.000988234	1.96051	5.51644	8.85282	1.83476	14.192	17.3173	20.1854	13.8248
CELE_D1044.7	D1044.7	0.863824	0.000989358	20.5854	30.3404	27.5421	29.3562	50.2178	40.0462	45.6828	60.6162
CELE_F08G2.6	ins-37	0.923982	0.000996211	28.4275	22.9852	18.6893	15.5955	43.6677	32.4699	46.7451	39.3474
CELE_T11F9.3	nas-20	0.642602	0.000996333	332.307	208.705	327.554	203.658	394.101	386.392	463.202	428.567
CELE_F58F9.4	F58F9.4	0.750732	0.00100258	41.1708	26.6628	38.3622	44.0342	66.5932	51.9519	65.8682	68.0603
CELE_ZK856.18	ZK856.18	1.06267	0.00100396	22.5459	12.8717	14.7547	18.3476	33.8424	32.4699	27.6221	48.9184
CELE_Y48B6A.5	Y48B6A.5	0.893362	0.00101041	40.1906	34.018	45.2477	38.53	75.3267	49.7872	100.927	66.9969
CELE_Y44E3B.2	tyr-5	1.01689	0.00101685	28.4275	19.3075	22.6239	13.7607	28.384	40.0462	53.1195	47.8549
CELE_F36H12.9	F36H12.9	1.3434	0.00102781	10.7828	6.43585	5.90188	8.25642	21.8338	14.0703	23.3726	20.2054
CELE_T05B11.4	T05B11.4	0.884067	0.0010685	160.762	81.8272	141.645	63.2992	198.688	226.207	195.48	204.181
CELE_K07E1.1	K07E1.1	0.626712	0.00107027	409.748	565.435	407.23	613.727	651.74	615.846	878.596	936.893
CELE_Y76A2A.1	tag-164	0.868519	0.00107683	45.0918	35.8569	50.166	29.3562	64.4098	77.9278	93.4903	56.3625
CELE_F54H12.7	F54H12.7	0.974487	0.00109165	31.3682	28.5016	36.3949	25.6866	43.6677	49.7872	74.3673	71.2507
CELE_F55A11.11	F55A11.11	0.699975	0.00110459	52.9339	41.3733	51.1496	39.4473	65.5015	72.5161	96.6774	64.87
CELE_R08A2.3	ssp-33	0.974081	0.00112553	26.467	28.5016	32.4603	15.5955	41.4843	48.7049	56.3066	55.299
CELE_F55A12.18	F55A12.18	1.61608	0.0011266	3.92103	11.0329	12.7874	5.50428	18.5588	17.3173	29.7469	36.157
CELE_ZC317.6	ZC317.6	0.835017	0.00113699	27.4472	34.9374	29.5094	20.1824	50.2178	42.2109	58.4314	48.9184
CELE_H34I24.1	H34I24.1	1.05649	0.00114573	18.6249	14.7105	15.7383	15.5955	36.0258	28.1406	31.8717	38.2839
CELE_F58H1.6	F58H1.6	0.9646	0.00114573	23.5262	18.3881	31.4767	18.3476	43.6677	41.1286	43.558	49.9818
CELE_F42G8.8	F42G8.8	1.00913	0.00115028	29.4077	30.3404	21.6402	18.3476	36.0258	44.3755	62.681	57.4259
CELE_ZC334.11	ins-27	0.747482	0.0011738	45.0918	39.5345	41.3131	38.53	54.5846	57.3635	82.8664	80.8216
CELE_R02D5.7	R02D5.7	0.917998	0.00120002	34.309	34.9374	20.6566	32.1083	57.8596	42.2109	60.5562	70.1872
CELE_F43C1.7	F43C1.7	1.87524	0.00120244	3.92103	3.67763	3.93458	4.5869	16.3754	18.3996	15.9358	8.50754
CELE_F59A6.4	F59A6.4	0.95068	0.00120244	45.0918	28.5016	44.2641	22.0171	44.7593	71.4338	70.1177	82.9485
CELE_T23F6.3	T23F6.3	0.831529	0.00121494	48.0326	30.3404	51.1496	30.2735	52.4012	67.1045	82.8664	80.8216
CELE_T13A10.10	aat-4	0.593971	0.00122146	124.493	92.8601	123.939	76.1425	162.662	145.032	151.922	169.087
CELE_T17A3.13	sqst-5	0.732713	0.00123405	32.3485	40.4539	29.5094	42.1995	57.8596	72.5161	54.1819	56.3625
CELE_ZC412.6	nspa-5	0.874717	0.00123529	31.3682	25.7434	26.5584	35.7778	54.5846	44.3755	42.4956	77.6313
CELE_ZC155.8	srpr-2.1	2.14313	0.00125859	3.92103	1.83881	3.93458	2.75214	6.55015	10.8233	22.3102	14.8882
CELE_Y106G6D.3	Y106G6D.3	0.724639	0.00125963	43.1313	41.3733	42.2968	40.3647	76.4184	48.7049	76.492	74.441
CELE_F52F10.3	oac-31	1.49345	0.00126887	4.90129	6.43585	4.91823	9.1738	15.2837	19.4819	18.0606	19.142
CELE_ZK892.5	ZK892.5	0.81423	0.00126887	22.5459	22.9852	32.4603	28.4388	46.9427	43.2932	41.4332	55.299
CELE_B0547.3	srd-14	1.28275	0.00126978	22.5459	8.27466	27.5421	15.5955	33.8424	34.6346	45.6828	64.87
CELE_AH6.2	sfxn-1.1	0.965182	0.00127584	21.5657	14.7105	17.7056	22.0171	34.9341	35.7169	31.8717	45.728
CELE_M05B5.1	M05B5.1	0.678085	0.0012817	41.1708	35.8569	32.4603	37.6126	61.1347	54.1165	59.4938	60.6162
CELE_F53B2.8	F53B2.8	0.664098	0.00128406	663.634	1137.31	709.209	1167.82	1422.47	1371.31	1467.16	1568.58
CELE_C04E12.5	C04E12.5	2.14432	0.00132736	8.82232	0.919406	2.95094	1.83476	16.3754	18.3996	16.9982	11.6979
CELE_F36H12.3	F36H12.3	1.08313	0.00134328	22.5459	17.4687	30.493	17.4302	43.6677	33.5522	55.2443	53.1721
CELE_T03F6.10	T03F6.10	1.17278	0.00134555	15.6841	7.35525	17.7056	9.1738	27.2923	24.8936	30.8093	28.7129
CELE_T08G3.4	T08G3.4	0.95485	0.00134911	30.388	22.0658	24.5912	14.6781	40.3926	32.4699	48.8699	55.299
CELE_Y18H1A.15	Y18H1A.15	1.3609	0.00135012	6.8618	6.43585	11.8038	6.42166	15.2837	25.9759	16.9982	22.3323
CELE_F36A2.14	F36A2.14	0.815503	0.00135177	56.8549	29.421	55.0842	32.1083	77.5101	66.0221	70.1177	90.3926
CELE_ZK455.6	hizr-1	0.606099	0.00136758	57.8352	59.7614	66.8879	53.208	111.353	93.0804	83.9288	73.3775
CELE_Y57G11C.14	Y57G11C.14	0.678634	0.0014053	40.1906	34.018	43.2804	38.53	58.9513	67.1045	62.681	60.6162
CELE_Y46H3B.2	clec-204	0.970413	0.00142415	59.7957	30.3404	67.8716	32.1083	100.436	119.056	74.3673	77.6313
CELE_C34F6.3	col-179	1.74481	0.00144154	4356.26	989.281	4072.3	914.628	8082.88	7712.69	9591.25	9241.32
CELE_Y38E10A.5	clec-4	0.990622	0.00144529	72.5391	112.168	55.0842	108.251	132.095	120.139	222.039	218.006
CELE_K08H2.10	K08H2.10	0.860057	0.00145832	29.4077	19.3075	34.4276	19.265	54.5846	44.3755	40.3708	45.728
CELE_Y38H8A.4	Y38H8A.4	0.85504	0.00146453	39.2103	22.9852	38.3622	29.3562	58.9513	54.1165	62.681	58.4893
CELE_K08A2.2	K08A2.2	1.05827	0.00147195	14.7039	22.0658	20.6566	23.8519	37.1175	31.3876	38.246	62.7431
CELE_Y119D3B.20	fbxa-92	1.28907	0.00147326	6.8618	17.4687	15.7383	14.6781	24.0172	30.3052	37.1836	42.5377
CELE_C44C10.3	C44C10.3	0.830097	0.00147326	56.8549	34.018	61.9697	44.9516	72.0516	63.8575	111.551	103.154
CELE_T19D2.1	adt-3	0.818836	0.00151754	55.8747	97.4571	73.7735	108.251	127.728	125.55	148.735	190.356
CELE_F37E3.3	comp-1	0.994677	0.00153684	39.2103	17.4687	36.3949	17.4302	49.1261	48.7049	65.8682	55.299
CELE_K09D9.2	cyp-35A3	0.824646	0.00154168	1644.87	898.26	1613.18	843.99	2397.35	2383.29	2032.35	2041.81
CELE_F28G4.5	oac-18	2.61892	0.00157249	2.94077	3.67763	3.93458	0.91738	22.9255	32.4699	7.43673	7.4441
CELE_F52F12.5	F52F12.5	0.861004	0.00159768	49.9931	25.7434	29.5094	31.1909	69.8683	51.9519	62.681	62.7431
CELE_ZK512.7	ZK512.7	0.985132	0.00161906	394.064	193.995	438.706	194.485	572.046	534.671	694.803	614.67
CELE_B0416.7	B0416.7	0.596517	0.00163023	53.9142	56.0838	60.0024	54.1254	96.0688	90.9157	77.5544	74.441
CELE_C09D4.3	C09D4.3	0.835519	0.00165924	80.3811	42.2927	58.0351	44.0342	76.4184	82.2571	121.112	120.169
CELE_ZK524.1	spe-4	0.85589	0.00170696	40.1906	35.8569	53.1169	25.6866	73.1433	66.0221	61.6186	78.6947
CELE_C27D9.2	C27D9.2	1.51067	0.00171188	11.7631	11.0329	3.93458	2.75214	26.2006	19.4819	16.9982	21.2689
CELE_ZC334.1	ins-26	0.839357	0.00173408	29.4077	22.9852	18.6893	23.8519	45.851	38.9639	40.3708	44.6646
CELE_F38B6.4	F38B6.4	0.604401	0.00174359	257.808	196.753	255.748	170.633	276.198	292.229	398.396	371.141
CELE_Y40H4A.2	Y40H4A.2	0.973733	0.00176431	18.6249	22.0658	16.722	21.0997	22.9255	33.5522	47.8075	49.9818
CELE_Y48G1C.5	Y48G1C.5	0.82786	0.00177858	23.5262	22.0658	31.4767	34.8604	46.9427	44.3755	61.6186	45.728
CELE_F58E1.6	nhx-6	2.03781	0.00181527	2.94077	6.43585	0.983646	3.66952	14.192	23.8113	12.7487	7.4441
CELE_Y73F8A.20	Y73F8A.20	0.961421	0.0018234	16.6644	22.0658	16.722	15.5955	28.384	28.1406	36.1212	45.728
CELE_B0432.12	clec-117	1.09795	0.00184888	19.6051	13.7911	13.771	8.25642	28.384	21.6466	28.6845	39.3474
CELE_Y38E10A.28	Y38E10A.28	0.931562	0.00185108	29.4077	29.421	38.3622	39.4473	80.7852	82.2571	52.0571	45.728
CELE_ZK1320.13	ZK1320.13	0.592852	0.00185108	76.4601	82.7466	101.316	77.9773	108.077	126.633	139.173	136.121
CELE_F36D3.16	F36D3.16	0.911639	0.00186929	24.5064	14.7105	26.5584	22.9345	34.9341	31.3876	49.9323	49.9818
CELE_F53B2.5	F53B2.5	0.816373	0.00187914	24.5064	23.9046	29.5094	21.0997	36.0258	42.2109	49.9323	45.728
CELE_ZC581.2	ZC581.2	0.896438	0.00189389	22.5459	18.3881	24.5912	18.3476	37.1175	27.0583	45.6828	45.728
CELE_F46A9.1	F46A9.1	0.747941	0.00192884	35.2893	29.421	32.4603	42.1995	52.4012	55.1988	50.9947	75.5044
CELE_C15H7.3	C15H7.3	0.715061	0.00194812	34.309	38.6151	40.3295	49.5385	75.3267	53.0342	55.2443	84.012
CELE_T02G5.11	T02G5.11	0.769719	0.00197458	48.0326	40.4539	71.8062	33.9431	99.3439	70.3515	83.9288	76.5679
CELE_T08B6.9	T08B6.9	0.778244	0.00198415	32.3485	50.5674	47.215	30.2735	64.4098	70.3515	71.1801	69.1238
CELE_Y47D7A.7	Y47D7A.7	2.58217	0.00206764	0	0	3.93458	2.75214	14.192	10.8233	7.43673	7.4441
CELE_F14B8.4	F14B8.4	0.972578	0.00206764	41.1708	13.7911	33.444	24.7693	49.1261	44.3755	63.7434	63.8066
CELE_Y37F4.5	Y37F4.5	1.06661	0.00208019	10.7828	12.8717	13.771	12.8433	27.2923	25.9759	33.9965	18.0785
CELE_F37A4.5	F37A4.5	0.778182	0.00208019	77.4403	42.2927	57.0515	38.53	74.235	86.5864	115.8	91.4561
CELE_E02C12.10	E02C12.10	3.40988	0.00210211	0	0	0	2.75214	9.82522	7.57631	5.31195	7.4441
CELE_K09C6.8	K09C6.8	1.54021	0.00212242	7.84206	4.59703	6.88552	5.50428	15.2837	14.0703	23.3726	19.142
CELE_Y46G5A.22	Y46G5A.22	0.919869	0.00214093	26.467	17.4687	17.7056	24.7693	50.2178	33.5522	36.1212	43.6011
CELE_F33E2.4	F33E2.4	1.24642	0.0022043	11.7631	10.1135	8.85282	9.1738	28.384	19.4819	25.4973	21.2689
CELE_Y39E4B.11	Y39E4B.11	1.09406	0.00221815	11.7631	14.7105	10.8201	11.0086	32.7507	24.8936	26.5597	19.142
CELE_F42F12.10	nspc-12	0.802222	0.00222026	26.467	25.7434	19.6729	22.9345	38.2092	36.7992	44.6204	45.728
CELE_F23D12.3	F23D12.3	0.697987	0.0022215	40.1906	48.7285	40.3295	28.4388	55.6763	63.8575	75.4297	60.6162
CELE_C08F8.4	mboa-4	0.754394	0.00223023	31.3682	22.9852	33.444	32.1083	40.3926	50.8695	49.9323	60.6162
CELE_Y73C8C.2	clec-210	1.60038	0.00228393	6.8618	3.67763	9.83646	4.5869	20.7421	10.8233	20.1854	23.3957
CELE_D1081.12	D1081.12	0.931809	0.00234696	37.2498	25.7434	19.6729	21.0997	43.6677	50.8695	63.7434	39.3474
CELE_Y57G11C.8	Y57G11C.8	0.683844	0.00238017	52.9339	37.6957	55.0842	33.0257	79.6935	79.0101	70.1177	57.4259
CELE_C29E4.14	C29E4.14	1.7355	0.00238233	1.96051	2.75822	9.83646	4.5869	16.3754	14.0703	13.8111	19.142
CELE_Y39B6A.1	Y39B6A.1	0.89772	0.00241841	23073.3	19411.4	23216	19315.4	43366.3	41483.6	32600.5	40944.7
CELE_C52E4.7	C52E4.7	0.88623	0.00243047	27.4472	32.1792	33.444	14.6781	48.0344	40.0462	56.3066	54.2356
CELE_F41G3.4	fis-1	1.15681	0.00249808	13.7236	6.43585	14.7547	6.42166	22.9255	22.7289	25.4973	20.2054
CELE_C53C11.2	C53C11.2	0.715084	0.00249841	25.4867	30.3404	27.5421	34.8604	44.7593	53.0342	44.6204	52.1087
CELE_F08G5.2	acl-13	0.95816	0.00254607	16.6644	17.4687	20.6566	19.265	24.0172	35.7169	45.6828	38.2839
CELE_Y48G1C.13	Y48G1C.13	0.636774	0.00258449	125.473	85.5048	102.299	64.2166	149.562	142.868	135.986	157.389
CELE_Y54G2A.3	vrp-1	0.741983	0.00260979	1063.58	480.85	1011.19	571.528	1375.53	1305.29	1291.87	1255.93
CELE_Y47H9B.2	Y47H9B.2	0.940583	0.00268013	19.6051	15.6299	13.771	19.265	37.1175	24.8936	37.1836	31.9033
CELE_F32B6.10	ttbk-3	1.12944	0.00271496	12.7433	10.1135	13.771	7.33904	30.5674	22.7289	18.0606	24.4592
CELE_T05A7.5	fut-6	0.713075	0.00277231	66.6575	110.329	75.7408	95.4075	150.653	183.996	98.8022	138.248
CELE_ZK354.3	ZK354.3	0.890192	0.0027887	30.388	22.9852	16.722	19.265	37.1175	42.2109	32.9341	53.1721
CELE_Y51H7C.42	Y51H7C.42	0.73077	0.00280299	57.8352	39.5345	54.1005	53.208	72.0516	73.5985	79.6792	113.788
CELE_C39B5.3	fbxa-62	2.2611	0.00283577	2.94077	0.919406	0	4.5869	8.73353	10.8233	11.6863	9.57098
CELE_R08A2.2	R08A2.2	0.955103	0.0028536	23.5262	11.0329	21.6402	18.3476	27.2923	41.1286	40.3708	35.0936
CELE_B0523.1	kin-31	0.840566	0.00287115	21.5657	20.2269	25.5748	17.4302	34.9341	32.4699	42.4956	41.4743
CELE_F14H3.2	best-12	1.73085	0.00288941	3.92103	2.75822	5.90188	2.75214	13.1003	14.0703	14.8735	8.50754
CELE_Y105C5B.14	ifas-3	1.46158	0.00291657	9.80257	6.43585	3.93458	6.42166	24.0172	21.6466	15.9358	11.6979
CELE_R08C7.5	R08C7.5	0.748233	0.00291657	36.2695	36.7763	37.3786	30.2735	41.4843	54.1165	71.1801	69.1238
CELE_T05D4.5	T05D4.5	0.77587	0.00292586	37.2498	32.1792	37.3786	24.7693	57.8596	66.0221	57.369	43.6011
CELE_F10F2.8	clec-153	0.852452	0.00298891	18.6249	25.7434	19.6729	23.8519	43.6677	37.8816	38.246	39.3474
CELE_Y116A8C.24	Y116A8C.24	1.22355	0.00300463	15.6841	6.43585	8.85282	9.1738	13.1003	21.6466	27.6221	30.8398
CELE_F28H1.5	F28H1.5	1.48549	0.0030349	4.90129	3.67763	7.86917	5.50428	10.9169	17.3173	21.2478	11.6979
CELE_ZK1127.2	acs-6	0.825398	0.00305607	58.8154	35.8569	67.8716	37.6126	100.436	77.9278	90.3031	85.0754
CELE_C32H11.13	dct-19	4.03564	0.00307268	0.980257	0	0.983646	0	10.9169	7.57631	3.18717	9.57098
CELE_B0454.7	clec-2	3.1759	0.00316443	0	0	2.95094	0.91738	10.9169	10.8233	6.37434	6.38066
CELE_C06E1.7	C06E1.7	1.17713	0.00317378	17.6446	24.824	15.7383	14.6781	60.043	53.0342	29.7469	22.3323
CELE_C45G7.5	cdh-10	0.968513	0.00319038	33.3288	22.0658	32.4603	40.3647	37.1175	53.0342	83.9288	76.5679
CELE_F25F2.1	F25F2.1	0.733267	0.00320134	44.1116	38.6151	32.4603	28.4388	46.9427	68.1868	74.3673	48.9184
CELE_C30B5.6	C30B5.6	0.971406	0.0032166	19.6051	19.3075	24.5912	25.6866	31.6591	36.7992	46.7451	59.5528
CELE_T21D12.2	dpy-9	0.943524	0.00323398	72.5391	69.8749	68.8552	71.5556	81.8769	87.6688	184.856	189.293
CELE_T02B11.9	T02B11.9	1.04576	0.00325357	19.6051	9.19406	13.771	17.4302	34.9341	27.0583	36.1212	25.5226
CELE_B0545.3	scl-23	1.14419	0.0032847	11.7631	11.0329	12.7874	8.25642	25.1089	12.988	28.6845	29.7764
CELE_W03A5.3	grl-22	0.771179	0.00333291	37.2498	31.2598	27.5421	27.5214	54.5846	55.1988	38.246	62.7431
CELE_F02E11.1	wht-4	0.746588	0.00338414	30.388	27.5822	28.5257	27.5214	44.7593	35.7169	53.1195	57.4259
CELE_T10B10.1	col-41	0.866283	0.00341127	81.3614	66.1973	71.8062	133.02	138.645	133.127	175.294	195.673
CELE_Y76B12C.4	Y76B12C.4	0.620294	0.00341167	48.0326	42.2927	44.2641	37.6126	62.2264	62.7752	71.1801	68.0603
CELE_F32H5.6	srx-125	1.25722	0.00343477	11.7631	8.27466	18.6893	11.9259	46.9427	29.2229	18.0606	26.5861
CELE_F44G3.7	F44G3.7	0.766722	0.00343477	39.2103	26.6628	37.3786	30.2735	49.1261	53.0342	66.9305	57.4259
CELE_ZK622.5	ZK622.5	0.798802	0.00345222	24.5064	29.421	26.5584	20.1824	37.1175	38.9639	46.7451	52.1087
CELE_R06B10.1	R06B10.1	0.809719	0.00352829	34.309	22.0658	38.3622	25.6866	38.2092	46.5402	65.8682	59.5528
CELE_F18C5.4	mpz-3	0.783506	0.00354032	17.6446	25.7434	29.5094	27.5214	38.2092	50.8695	38.246	45.728
CELE_T25B9.4	T25B9.4	0.992826	0.00354643	11.7631	7.35525	16.722	19.265	24.0172	27.0583	29.7469	28.7129
CELE_F07E5.8	F07E5.8	1.35756	0.00354708	6.8618	6.43585	9.83646	5.50428	24.0172	11.9056	20.1854	17.0151
CELE_Y47D3A.10	tbx-34	0.903633	0.00355294	24.5064	22.9852	27.5421	29.3562	40.3926	35.7169	76.492	42.5377
CELE_F18A12.1	nep-6	0.982094	0.00356152	17.6446	10.1135	19.6729	10.0912	29.4757	28.1406	26.5597	28.7129
CELE_F56D6.19	F56D6.19	1.43095	0.00358558	9.80257	7.35525	3.93458	3.66952	12.0086	20.5643	19.123	14.8882
CELE_C29F3.6	srx-58	1.42112	0.00363165	13.7236	6.43585	10.8201	1.83476	25.1089	18.3996	18.0606	25.5226
CELE_T04B2.2	frk-1	0.922892	0.00365195	26.467	23.9046	25.5748	36.6952	51.3095	48.7049	53.1195	60.6162
CELE_K09G1.2	K09G1.2	1.15797	0.00366583	10.7828	9.19406	14.7547	7.33904	22.9255	16.235	21.2478	32.9667
CELE_W08D2.8	kin-21	1.12598	0.00372532	10.7828	10.1135	13.771	6.42166	24.0172	25.9759	14.8735	24.4592
CELE_Y51B9A.5	Y51B9A.5	1.1596	0.00392091	11.7631	10.1135	12.7874	6.42166	26.2006	21.6466	26.5597	17.0151
CELE_ZK1086.2	ZK1086.2	1.11283	0.00393473	11.7631	7.35525	11.8038	12.8433	19.6504	20.5643	30.8093	23.3957
CELE_C24D10.2	C24D10.2	0.712574	0.00400859	62.7365	40.4539	47.215	33.0257	79.6935	59.5282	84.9912	75.5044
CELE_C50H2.10	fipr-11	0.913045	0.00407227	26.467	15.6299	17.7056	14.6781	30.5674	43.2932	28.6845	37.2205
CELE_F29B9.7	F29B9.7	0.948239	0.00411336	13.7236	21.1463	13.771	11.9259	28.384	22.7289	33.9965	31.9033
CELE_B0564.3	best-1	0.677824	0.00411967	31.3682	42.2927	46.2314	57.7949	76.4184	62.7752	84.9912	60.6162
CELE_Y38F2AR.10	Y38F2AR.10	0.96626	0.00414392	17.6446	12.8717	13.771	11.9259	21.8338	24.8936	36.1212	26.5861
CELE_C28C12.4	srlf-3	0.863363	0.00414399	37.2498	19.3075	36.3949	26.604	40.3926	48.7049	69.0553	58.4893
CELE_W03D8.10	W03D8.10	0.94355	0.00420463	17.6446	16.5493	21.6402	17.4302	20.7421	47.6225	40.3708	31.9033
CELE_C01B4.7	C01B4.7	1.83023	0.00420988	4.90129	4.59703	9.83646	3.66952	13.1003	14.0703	35.0589	19.142
CELE_C34H4.3	tag-244	0.677467	0.00421376	126.453	271.225	148.531	252.28	314.407	295.476	335.715	332.858
CELE_Y18D10A.21	Y18D10A.21	1.10361	0.00421462	9.80257	11.9523	9.83646	12.8433	31.6591	19.4819	15.9358	28.7129
CELE_ZC449.8	ZC449.8	1.13549	0.00423164	44.1116	12.8717	48.1987	22.0171	79.6935	59.5282	74.3673	64.87
CELE_Y32B12A.3	comt-2	1.62899	0.00426946	9.80257	13.7911	13.771	4.5869	49.1261	45.4579	12.7487	22.3323
CELE_K06H7.8	K06H7.8	0.973958	0.00429053	14.7039	11.0329	22.6239	17.4302	29.4757	27.0583	39.3084	32.9667
CELE_F39E9.4	nep-13	0.955593	0.00431033	20.5854	13.7911	25.5748	21.0997	33.8424	37.8816	32.9341	52.1087
CELE_F19B6.4	wht-5	0.737946	0.00435069	26.467	26.6628	32.4603	24.7693	45.851	45.4579	47.8075	44.6646
CELE_R155.3	R155.3	0.835794	0.00438789	23.5262	26.6628	24.5912	17.4302	48.0344	29.2229	40.3708	46.7915
CELE_Y47D3A.30	elo-8	1.01538	0.00439824	17.6446	17.4687	29.5094	14.6781	19.6504	43.2932	45.6828	51.0452
CELE_Y4C6A.68	Y4C6A.68	1.21331	0.00439842	10.7828	7.35525	8.85282	10.0912	17.4671	17.3173	28.6845	22.3323
CELE_C47E12.10	C47E12.10	1.36877	0.00440968	5.88154	5.51644	5.90188	6.42166	17.4671	12.988	12.7487	18.0785
CELE_M117.4	M117.4	0.70391	0.00453505	44.1116	34.9374	43.2804	30.2735	52.4012	47.6225	81.804	65.9334
CELE_F58G6.7	F58G6.7	0.936013	0.00454091	116.651	52.4062	110.168	44.9516	118.994	141.785	191.23	166.96
CELE_F54A3.4	cbs-2	0.665125	0.00454303	44.1116	31.2598	43.2804	30.2735	53.4929	64.9398	48.8699	68.0603
CELE_T26E4.12	srd-27	1.20458	0.00455961	4.90129	11.0329	6.88552	10.0912	19.6504	21.6466	14.8735	20.2054
CELE_Y32G9A.4	srp-3	0.866128	0.00456228	26.467	25.7434	17.7056	24.7693	28.384	42.2109	46.7451	55.299
CELE_C02B10.6	C02B10.6	1.03471	0.00457204	15.6841	12.8717	13.771	9.1738	19.6504	20.5643	35.0589	29.7764
CELE_F16H6.1	clec-42	1.07115	0.00461032	62.7365	165.493	62.9534	153.202	289.298	318.205	156.171	171.214
CELE_C04F12.16	C04F12.16	0.812674	0.00472515	22.5459	23.9046	35.4113	19.265	31.6591	41.1286	49.9323	54.2356
CELE_Y66D12A.3	Y66D12A.3	0.857411	0.00477434	22.5459	13.7911	18.6893	19.265	30.5674	31.3876	42.4956	29.7764
CELE_F11G11.14	F11G11.14	2.13216	0.00478286	1.96051	0.919406	1.96729	2.75214	6.55015	7.57631	10.6239	8.50754
CELE_B0205.14	B0205.14	3.49202	0.00483171	0	0	1.96729	0.91738	2.18338	8.65864	7.43673	13.8248
CELE_F55C5.2	F55C5.2	1.15548	0.00488816	8.82232	11.9523	16.722	20.1824	26.2006	19.4819	43.558	39.3474
CELE_F52F10.4	oac-32	1.94271	0.00491982	0	3.67763	3.93458	4.5869	9.82522	10.8233	9.56151	17.0151
CELE_C43F9.6	nkb-2	0.858292	0.00492117	54.8944	22.9852	56.0678	37.6126	61.1347	66.0221	90.3031	92.5195
CELE_K10C9.7	K10C9.7	0.844794	0.00502607	21.5657	20.2269	20.6566	18.3476	26.2006	37.8816	49.9323	30.8398
CELE_Y69E1A.8	Y69E1A.8	0.899063	0.00504982	16.6644	14.7105	15.7383	17.4302	32.7507	23.8113	33.9965	29.7764
CELE_F54C1.9	sst-20	0.755774	0.00513445	43.1313	34.018	34.4276	24.7693	50.2178	43.2932	65.8682	70.1872
CELE_Y39D8A.1	Y39D8A.1	0.965649	0.00518018	94.1047	41.3733	83.6099	32.1083	110.261	100.657	150.859	127.613
CELE_Y39A3B.3	Y39A3B.3	1.83633	0.00521445	4.90129	0.919406	2.95094	3.66952	16.3754	12.988	8.49912	6.38066
CELE_T16G12.3	T16G12.3	0.588165	0.00523472	531.3	295.129	570.515	334.844	644.098	708.926	627.872	621.05
CELE_H06I04.5	H06I04.5	0.988064	0.00524177	19.6051	22.9852	17.7056	16.5128	36.0258	23.8113	45.6828	46.7915
CELE_T04B2.7	T04B2.7	1.00013	0.00530441	14.7039	10.1135	22.6239	15.5955	27.2923	27.0583	25.4973	45.728
CELE_K04C2.8	K04C2.8	0.993573	0.00533306	15.6841	10.1135	11.8038	13.7607	24.0172	29.2229	21.2478	27.6495
CELE_Y69A2AR.8	Y69A2AR.8	0.936182	0.00540349	40.1906	14.7105	30.493	18.3476	43.6677	42.2109	54.1819	57.4259
CELE_W06D11.4	dot-1.3	1.87252	0.0055123	1.96051	3.67763	2.95094	3.66952	6.55015	12.988	9.56151	15.9516
CELE_E03H12.7	E03H12.7	0.711744	0.00561727	40.1906	22.9852	39.3458	34.8604	50.2178	42.2109	64.8058	66.9969
CELE_C36E6.8	C36E6.8	0.952845	0.00563203	11.7631	12.8717	22.6239	15.5955	31.6591	24.8936	33.9965	30.8398
CELE_F33D11.7	F33D11.7	0.984519	0.00566363	25.4867	13.7911	14.7547	11.9259	29.4757	32.4699	26.5597	41.4743
CELE_C09H10.9	C09H10.9	1.12335	0.00568748	14.7039	7.35525	12.7874	8.25642	14.192	23.8113	31.8717	23.3957
CELE_T08H10.3	T08H10.3	0.91488	0.00571911	14.7039	19.3075	15.7383	10.0912	25.1089	21.6466	32.9341	32.9667
CELE_T08G11.2	T08G11.2	0.859239	0.00571911	40.1906	20.2269	27.5421	20.1824	44.7593	42.2109	63.7434	44.6646
CELE_T11F9.9	col-157	0.63584	0.00571911	178.407	213.302	186.893	221.089	312.224	275.994	341.027	313.716
CELE_C14A6.13	C14A6.13	0.822445	0.0057585	26.467	22.0658	26.5584	17.4302	27.2923	40.0462	52.0571	43.6011
CELE_C25E10.4	C25E10.4	0.803229	0.00576301	25.4867	34.9374	39.3458	31.1909	43.6677	44.3755	69.0553	71.2507
CELE_Y54F10AM.11	Y54F10AM.11	0.621145	0.00577064	644.029	312.598	383.622	333.009	705.233	641.822	627.872	597.655
CELE_Y47H10A.1	clp-3	0.654462	0.00595388	41.1708	29.421	35.4113	30.2735	62.2264	50.8695	47.8075	53.1721
CELE_C28G1.1	ubc-23	0.666027	0.0060295	40.1906	43.2121	32.4603	33.0257	58.9513	47.6225	63.7434	65.9334
CELE_M7.7	M7.7	0.865751	0.00613647	22.5459	19.3075	19.6729	14.6781	33.8424	27.0583	38.246	39.3474
CELE_C13D9.8	ncx-9	2.93353	0.00614114	0.980257	0	0.983646	1.83476	7.64184	5.41165	4.24956	11.6979
CELE_Y41D4B.18	Y41D4B.18	0.908007	0.00618926	19.6051	27.5822	16.722	32.1083	58.9513	45.4579	38.246	38.2839
CELE_T26H5.9	T26H5.9	0.754909	0.00623171	320.544	713.459	338.374	701.796	818.769	769.537	1005.02	908.18
CELE_F33D11.2	F33D11.2	1.1371	0.00628567	11.7631	5.51644	14.7547	6.42166	20.7421	25.9759	19.123	18.0785
CELE_ZK697.6	gst-21	0.622187	0.00630515	43.1313	38.6151	29.5094	33.9431	48.0344	60.6105	59.4938	55.299
CELE_Y39A3A.3	Y39A3A.3	1.65572	0.00631152	3.92103	1.83881	3.93458	7.33904	12.0086	18.3996	13.8111	9.57098
CELE_F18E3.13	F18E3.13	1.11589	0.00631691	106.848	39.5345	80.659	43.1169	101.527	85.5041	209.291	188.229
CELE_F02C9.4	irld-3	0.937175	0.0063357	25.4867	14.7105	27.5421	12.8433	29.4757	34.6346	45.6828	43.6011
CELE_M04C9.4	M04C9.4	0.908547	0.00633667	22.5459	34.018	16.722	17.4302	29.4757	40.0462	53.1195	47.8549
CELE_ZC513.8	col-43	1.39707	0.00636976	42.1511	7.35525	37.3786	8.25642	62.2264	70.3515	56.3066	60.6162
CELE_W01B11.1	W01B11.1	1.25052	0.00644699	6.8618	9.19406	5.90188	6.42166	17.4671	11.9056	18.0606	20.2054
CELE_C18H2.5	C18H2.5	0.893807	0.00646824	19.6051	11.9523	17.7056	17.4302	33.8424	29.2229	35.0589	25.5226
CELE_T28H11.6	ssp-11	0.768434	0.00647617	20.5854	29.421	25.5748	18.3476	30.5674	41.1286	45.6828	42.5377
CELE_Y17D7B.7	Y17D7B.7	1.50675	0.00654012	31.3682	2.75822	32.4603	13.7607	48.0344	45.4579	73.3049	60.6162
CELE_F59B10.4	F59B10.4	0.60355	0.00659825	62.7365	96.5377	62.9534	106.416	125.545	100.657	131.736	142.501
CELE_C01B4.9	mct-2	0.885684	0.00664526	59.7957	55.1644	54.1005	38.53	126.636	91.9981	82.8664	81.8851
CELE_F32A7.7	str-245	1.23736	0.00671626	13.7236	5.51644	7.86917	5.50428	20.7421	23.8113	18.0606	13.8248
CELE_K03H1.12	K03H1.12	0.969695	0.00678737	33.3288	15.6299	28.5257	16.5128	28.384	36.7992	55.2443	62.7431
CELE_Y71G12B.27	Y71G12B.27	0.860328	0.00683866	30.388	29.421	36.3949	16.5128	42.576	53.0342	44.6204	63.8066
CELE_R03G8.3	R03G8.3	0.628333	0.00701508	69.5983	108.49	79.6753	104.581	152.837	112.562	150.859	144.628
CELE_Y55B1AR.4	Y55B1AR.4	0.820738	0.0070336	18.6249	15.6299	16.722	22.0171	37.1175	31.3876	22.3102	38.2839
CELE_F07C6.6	F07C6.6	1.63902	0.00703745	6.8618	1.83881	4.91823	2.75214	14.192	8.65864	16.9982	10.6344
CELE_F59A1.13	F59A1.13	1.02126	0.00711186	14.7039	17.4687	12.7874	12.8433	46.9427	28.1406	22.3102	20.2054
CELE_W02B12.7	klp-17	0.879275	0.00717248	17.6446	15.6299	19.6729	13.7607	21.8338	28.1406	37.1836	35.0936
CELE_K11H12.3	K11H12.3	1.99771	0.00717463	0.980257	2.75822	5.90188	0.91738	7.64184	8.65864	12.7487	12.7613
CELE_C04E6.5	C04E6.5	1.05236	0.00719445	11.7631	7.35525	8.85282	16.5128	25.1089	18.3996	21.2478	27.6495
CELE_H32C10.1	H32C10.1	0.632497	0.00720124	42.1511	36.7763	34.4276	30.2735	44.7593	58.4458	57.369	61.6797
CELE_F49C12.7	F49C12.7	0.80223	0.00720579	971.435	1083.06	946.268	1015.54	1799.11	1816.15	1750.82	1637.7
CELE_Y41D4B.15	Y41D4B.15	1.41951	0.00723846	3.92103	14.7105	4.91823	9.1738	19.6504	28.1406	25.4973	14.8882
CELE_Y11D7A.3	Y11D7A.3	0.713431	0.00735456	573.451	306.162	607.893	328.422	664.84	689.444	796.792	825.231
CELE_F35C5.12	F35C5.12	0.743301	0.0073875	24.5064	32.1792	21.6402	24.7693	43.6677	30.3052	53.1195	45.728
CELE_K07F5.4	kin-24	1.0261	0.00742202	11.7631	10.1135	15.7383	11.0086	17.4671	20.5643	23.3726	37.2205
CELE_D2045.5	D2045.5	0.70767	0.00761851	24.5064	22.0658	29.5094	24.7693	44.7593	35.7169	43.558	40.4108
CELE_Y47G6A.33	Y47G6A.33	0.900939	0.00763624	679.318	249.159	729.865	275.214	909.379	890.758	905.156	903.926
CELE_F31B12.3	F31B12.3	0.627753	0.00766187	36.2695	35.8569	44.2641	23.8519	52.4012	54.1165	52.0571	57.4259
CELE_F41H10.7	elo-5	0.968362	0.00770532	2020.31	720.815	2114.84	706.383	2766.35	2692.84	2731.4	2691.57
CELE_C35E7.9	C35E7.9	0.589357	0.0077865	47.0524	34.018	45.2477	34.8604	62.2264	54.1165	60.5562	64.87
CELE_D2062.4	D2062.4	0.91913	0.00789555	13.7236	20.2269	17.7056	9.1738	21.8338	30.3052	30.8093	31.9033
CELE_K09E10.1	oac-57	0.818789	0.00790234	24.5064	32.1792	20.6566	49.5385	54.5846	60.6105	45.6828	63.8066
CELE_ZK1290.10	ZK1290.10	1.34819	0.00801915	7.84206	11.9523	4.91823	19.265	12.0086	33.5522	32.9341	34.0302
CELE_ZK546.4	ZK546.4	0.852813	0.00816035	22.5459	20.2269	13.771	18.3476	37.1175	20.5643	32.9341	44.6646
CELE_B0024.1	col-149	1.1637	0.00818531	382.3	115.845	383.622	89.9032	504.361	557.4	546.068	567.878
CELE_C03A7.7	abu-6	0.597847	0.00830895	73.5193	75.3913	64.9206	95.4075	123.361	101.739	112.613	130.803
CELE_F58F12.3	F58F12.3	1.01109	0.00839182	16.6644	11.9523	14.7547	10.0912	29.4757	14.0703	28.6845	35.0936
CELE_C47E8.10	C47E8.10	1.76126	0.00842301	3.92103	3.67763	3.93458	1.83476	10.9169	10.8233	6.37434	17.0151
CELE_H23N18.2	ugt-14	0.754629	0.00842301	22.5459	23.9046	28.5257	27.5214	37.1175	41.1286	42.4956	52.1087
CELE_R13H9.5	ttbk-2.2	0.714109	0.0084385	22.5459	23.9046	33.444	25.6866	37.1175	44.3755	44.6204	46.7915
CELE_C55B7.3	C55B7.3	0.918681	0.00850959	60.776	41.3733	68.8552	36.6952	66.5932	56.2812	134.923	133.994
CELE_R09B5.12	chil-14	1.34677	0.0085734	8.82232	5.51644	4.91823	3.66952	14.192	16.235	11.6863	15.9516
CELE_F15H10.4	tag-314	1.21901	0.00859791	7.84206	5.51644	8.85282	11.0086	13.1003	22.7289	16.9982	24.4592
CELE_F10C1.3	F10C1.3	0.814009	0.00864069	26.467	15.6299	19.6729	13.7607	31.6591	32.4699	31.8717	36.157
CELE_C50E10.2	C50E10.2	1.00511	0.00879104	13.7236	11.0329	10.8201	14.6781	25.1089	14.0703	27.6221	34.0302
CELE_C08F11.12	C08F11.12	0.747635	0.00884643	35.2893	22.9852	39.3458	22.0171	57.8596	51.9519	48.8699	41.4743
CELE_T05H4.2	fbxa-196	1.14083	0.00888518	11.7631	8.27466	13.771	9.1738	19.6504	17.3173	22.3102	35.0936
CELE_T15B12.2	T15B12.2	0.791421	0.00895373	21.5657	29.421	25.5748	27.5214	25.1089	60.6105	49.9323	44.6646
CELE_T04F3.3	T04F3.3	0.779579	0.00909522	24.5064	25.7434	31.4767	19.265	48.0344	34.6346	57.369	32.9667
CELE_F21D9.2	F21D9.2	0.732785	0.00910301	34.309	24.824	25.5748	16.5128	37.1175	43.2932	47.8075	39.3474
CELE_Y45F10B.3	Y45F10B.3	0.816901	0.00918843	26.467	16.5493	17.7056	19.265	26.2006	31.3876	47.8075	35.0936
CELE_Y51H4A.13	Y51H4A.13	0.74489	0.00928241	25.4867	25.7434	27.5421	27.5214	36.0258	29.2229	57.369	55.299
CELE_F54D8.10	F54D8.10	1.304	0.00929302	9.80257	6.43585	10.8201	7.33904	10.9169	14.0703	28.6845	30.8398
CELE_AC3.4	pqn-2	0.68922	0.00930727	70.5785	43.2121	62.9534	56.8776	108.077	72.5161	103.052	92.5195
CELE_AC7.3	AC7.3	1.57633	0.00939268	4.90129	2.75822	3.93458	6.42166	14.192	14.0703	18.0606	7.4441
CELE_T06G6.6	T06G6.6	1.18588	0.00941032	17.6446	23.9046	18.6893	22.9345	16.3754	40.0462	65.8682	66.9969
CELE_Y57G11C.6	ptp-5.2	0.650619	0.0094632	34.309	34.018	32.4603	29.3562	52.4012	46.5402	37.1836	68.0603
CELE_F41C3.2	F41C3.2	0.865426	0.00949185	76.4601	147.105	91.4791	154.12	133.186	141.785	291.095	289.256
CELE_B0261.5	B0261.5	1.48212	0.00954935	5.88154	3.67763	3.93458	2.75214	13.1003	9.74097	11.6863	10.6344
CELE_Y50D4B.4	Y50D4B.4	0.928504	0.00959754	471.504	193.075	468.216	166.046	615.714	619.093	641.683	594.464
CELE_E02C12.6	E02C12.6	0.755478	0.0096327	22.5459	22.9852	19.6729	23.8519	33.8424	46.5402	28.6845	41.4743
CELE_Y80D3A.7	ptr-22	0.658895	0.00963841	218.597	467.978	275.421	483.459	633.181	635.328	495.074	520.023
CELE_T27D12.6	T27D12.6	1.10259	0.0096604	5.88154	13.7911	6.88552	14.6781	26.2006	16.235	16.9982	29.7764
CELE_F56B3.6	F56B3.6	0.693699	0.00977978	72.5391	47.8091	64.9206	39.4473	74.235	68.1868	110.489	109.535
CELE_D1086.20	D1086.20	1.5789	0.00981135	2.94077	5.51644	6.88552	0.91738	13.1003	6.49398	14.8735	13.8248
CELE_F56F3.4	mstr-2	0.590352	0.00981135	48.0326	43.2121	45.2477	46.7864	52.4012	58.4458	81.804	82.9485
CELE_F59A7.9	cysl-4	1.22545	0.00981578	6.8618	9.19406	18.6893	3.66952	24.0172	25.9759	24.435	14.8882
CELE_ZK896.5	ZK896.5	0.705879	0.00993334	51.9536	63.439	43.2804	73.3904	79.6935	100.657	99.8646	98.9002
CELE_F48C1.11	F48C1.11	2.43676	0.00994058	1.96051	1.83881	1.96729	3.66952	3.27507	3.24699	23.3726	21.2689
CELE_C45B2.2	C45B2.2	0.85549	0.00997432	80.3811	178.365	99.3483	155.955	168.12	147.197	313.405	302.018
CELE_C31G12.2	clec-245	1.93904	0.0100165	7.84206	0	4.91823	0.91738	12.0086	17.3173	8.49912	13.8248
CELE_C17B7.5	C17B7.5	1.82412	0.0100238	1.96051	1.83881	5.90188	3.66952	6.55015	8.65864	10.6239	21.2689
CELE_Y73B6BL.24	acp-6	0.995966	0.0101311	5436.51	1780.89	5818.27	1726.51	6859.1	6931.24	7844.68	7805.67
CELE_Y60A3A.16	Y60A3A.16	0.834188	0.010288	22.5459	17.4687	15.7383	30.2735	39.3009	35.7169	38.246	40.4108
CELE_F42A10.9	F42A10.9	0.732907	0.0104084	130.374	69.8749	148.531	67.8861	185.588	166.679	151.922	187.166
CELE_R13H4.3	pho-8	0.599457	0.0104194	73.5193	56.0838	77.708	46.7864	114.628	100.657	84.9912	84.012
CELE_R03H10.12	R03H10.12	1.15406	0.0104517	7.84206	6.43585	7.86917	7.33904	14.192	14.0703	22.3102	14.8882
CELE_Y105C5A.13	Y105C5A.13	1.48315	0.0106386	3.92103	19.3075	1.96729	17.4302	17.4671	29.2229	31.8717	41.4743
CELE_H02F09.3	H02F09.3	0.967509	0.0106566	17.6446	56.0838	24.5912	47.7038	92.7938	76.8455	49.9323	66.9969
CELE_Y46H3A.4	Y46H3A.4	0.880548	0.0106566	14.7039	15.6299	20.6566	20.1824	30.5674	28.1406	39.3084	32.9667
CELE_C02H6.2	fbxa-105	0.627485	0.0108833	60.776	62.5196	53.1169	67.8861	99.3439	121.221	94.5527	62.7431
CELE_R05D8.7	R05D8.7	0.670609	0.0109011	34.309	42.2927	19.6729	30.2735	42.576	53.0342	55.2443	51.0452
CELE_Y57G11B.7	irld-18	1.05745	0.0110149	11.7631	12.8717	8.85282	8.25642	12.0086	19.4819	25.4973	29.7764
CELE_F47G6.3	F47G6.3	0.924764	0.0110249	14.7039	12.8717	14.7547	8.25642	27.2923	20.5643	21.2478	26.5861
CELE_F54H5.3	F54H5.3	1.05739	0.0110341	15.6841	8.27466	18.6893	9.1738	18.5588	18.3996	33.9965	36.157
CELE_C04G2.5	C04G2.5	1.04873	0.011162	7.84206	11.9523	15.7383	13.7607	24.0172	21.6466	29.7469	26.5861
CELE_W02H3.1	W02H3.1	1.15807	0.0112679	77.4403	22.0658	67.8716	19.265	86.2436	103.904	111.551	113.788
CELE_ZK418.2	ZK418.2	0.832953	0.0112726	29.4077	17.4687	27.5421	21.0997	36.0258	37.8816	54.1819	41.4743
CELE_AC3.10	spe-10	0.954479	0.0113233	11.7631	10.1135	8.85282	11.9259	18.5588	20.5643	23.3726	20.2054
CELE_C07G1.6	C07G1.6	0.955395	0.0114871	16.6644	7.35525	11.8038	14.6781	19.6504	18.3996	30.8093	28.7129
CELE_Y41C4A.16	col-95	0.779449	0.0115375	6523.61	2806.03	6158.61	2748.47	9057.76	8683.54	6994.77	6565.69
CELE_ZC47.7	fbxa-151	1.56291	0.011581	6.8618	4.59703	2.95094	2.75214	15.2837	12.988	15.9358	6.38066
CELE_C50F7.3	C50F7.3	1.12151	0.0116019	17.6446	5.51644	18.6893	6.42166	18.5588	30.3052	32.9341	22.3323
CELE_Y71G12B.32	Y71G12B.32	1.51775	0.0117261	6.8618	5.51644	0.983646	4.5869	6.55015	18.3996	15.9358	10.6344
CELE_F31D5.1	F31D5.1	1.11921	0.0117549	19.6051	5.51644	13.771	13.7607	31.6591	24.8936	33.9965	23.3957
CELE_T02E1.1	spe-12	1.1571	0.0118954	8.82232	8.27466	5.90188	7.33904	15.2837	18.3996	14.8735	19.142
CELE_C04G2.2	ttbk-5	0.8215	0.011898	42.1511	22.9852	32.4603	22.9345	38.2092	42.2109	70.1177	61.6797
CELE_C49C8.1	C49C8.1	1.36581	0.0120183	13.7236	11.0329	1.96729	7.33904	14.192	16.235	24.435	32.9667
CELE_Y58A7A.5	Y58A7A.5	1.02418	0.0120595	17.6446	10.1135	8.85282	19.265	26.2006	17.3173	33.9965	36.157
CELE_B0545.4	B0545.4	0.829429	0.012257	22.5459	28.5016	12.7874	21.0997	27.2923	35.7169	36.1212	52.1087
CELE_F14F7.3	cyp-13A12	0.977828	0.0122675	16.6644	47.8091	19.6729	42.1995	41.4843	46.5402	80.7416	80.8216
CELE_T09F5.10	T09F5.10	0.906943	0.0122717	18.6249	16.5493	17.7056	9.1738	24.0172	25.9759	39.3084	26.5861
CELE_R13H9.6	R13H9.6	1.11159	0.0122966	5.88154	6.43585	13.771	7.33904	15.2837	12.988	23.3726	20.2054
CELE_C24F3.5	abt-1	0.746695	0.012732	46.0721	30.3404	31.4767	21.0997	45.851	48.7049	49.9323	71.2507
CELE_Y54E2A.9	Y54E2A.9	0.798902	0.0127445	20.5854	11.9523	28.5257	16.5128	25.1089	35.7169	38.246	35.0936
CELE_K06A1.2	K06A1.2	1.00072	0.0129348	7.84206	12.8717	10.8201	9.1738	17.4671	14.0703	27.6221	22.3323
CELE_ZK1037.10	wrt-7	1.67385	0.0130505	3.92103	2.75822	5.90188	3.66952	10.9169	19.4819	7.43673	13.8248
CELE_C34B2.3	C34B2.3	0.835215	0.0130548	25.4867	20.2269	16.722	18.3476	29.4757	45.4579	28.6845	40.4108
CELE_F37H8.4	sfxn-1.2	0.708603	0.0131803	29.4077	27.5822	16.722	18.3476	36.0258	36.7992	33.9965	43.6011
CELE_F26D2.10	F26D2.10	0.799172	0.0133342	18.6249	19.3075	19.6729	18.3476	30.5674	30.3052	39.3084	31.9033
CELE_Y106G6D.6	Y106G6D.6	0.684181	0.0134292	52.9339	34.018	41.3131	28.4388	46.9427	53.0342	75.4297	75.5044
CELE_Y116F11B.7	Y116F11B.7	1.39012	0.0134743	3.92103	3.67763	5.90188	4.5869	12.0086	12.988	10.6239	11.6979
CELE_C36C5.12	C36C5.12	0.977265	0.0137867	16.6644	11.9523	9.83646	9.1738	30.5674	18.3996	24.435	20.2054
CELE_F46F5.6	msrp-3	1.04917	0.0138195	30.388	14.7105	30.493	8.25642	28.384	38.9639	50.9947	54.2356
CELE_F33H12.5	sri-36	3.11497	0.0138809	0	1.83881	0.983646	0	3.27507	2.16466	8.49912	10.6344
CELE_F16C3.4	F16C3.4	1.47098	0.0139103	4.90129	3.67763	4.91823	5.50428	17.4671	4.32932	12.7487	18.0785
CELE_F36A4.5	F36A4.5	0.992502	0.0139143	21.5657	6.43585	24.5912	13.7607	41.4843	31.3876	32.9341	25.5226
CELE_T25D3.3	T25D3.3	0.591107	0.0139498	111.749	59.7614	105.25	68.8035	156.112	112.562	123.237	127.613
CELE_F38H4.6	F38H4.6	1.45118	0.0139559	1.96051	5.51644	4.91823	3.66952	8.73353	14.0703	10.6239	10.6344
CELE_T27B2.1	dmsr-16	1.7697	0.0139688	12.7433	6.43585	4.91823	0.91738	20.7421	20.5643	22.3102	21.2689
CELE_Y69A2AR.23	Y69A2AR.23	1.2244	0.0139973	7.84206	4.59703	8.85282	5.50428	14.192	10.8233	19.123	18.0785
CELE_T11F9.6	nas-22	1.02546	0.0139973	16.6644	10.1135	10.8201	10.0912	31.6591	20.5643	16.9982	27.6495
CELE_F13A7.10	gst-44	0.981776	0.0139973	30.388	11.0329	28.5257	13.7607	39.3009	47.6225	28.6845	48.9184
CELE_Y67H2A.9	Y67H2A.9	0.967504	0.0141365	119.591	50.5674	125.907	37.6126	148.47	129.88	198.667	174.405
CELE_K03H1.9	K03H1.9	1.11063	0.0142854	8.82232	6.43585	6.88552	9.1738	15.2837	9.74097	20.1854	22.3323
CELE_R01H2.2	R01H2.2	0.833011	0.0143803	22.5459	13.7911	16.722	14.6781	26.2006	27.0583	32.9341	34.0302
CELE_B0454.26	B0454.26	1.49821	0.0144605	5.88154	1.83881	3.93458	5.50428	8.73353	14.0703	14.8735	10.6344
CELE_F26A1.10	nspd-9	0.671024	0.014463	23.5262	18.3881	37.3786	25.6866	44.7593	36.7992	40.3708	44.6646
CELE_F32A5.5	aqp-1	0.658382	0.0145246	465.622	236.287	521.332	265.123	512.003	477.308	658.682	699.745
CELE_C09D4.9	C09D4.9	1.33048	0.0145676	3.92103	11.9523	1.96729	4.5869	12.0086	17.3173	11.6863	15.9516
CELE_F07H5.9	pho-13	0.737467	0.0145716	174.486	96.5377	210.5	103.664	181.221	195.902	294.282	303.081
CELE_Y71G12B.30	Y71G12B.30	0.751033	0.0145802	33.3288	21.1463	21.6402	19.265	28.384	53.0342	33.9965	44.6646
CELE_C08E8.10	C08E8.10	0.617297	0.0146268	46.0721	86.4242	49.1823	93.5728	108.077	101.739	106.239	107.408
CELE_T13C5.1	daf-9	0.78635	0.0147354	18.6249	21.1463	30.493	14.6781	37.1175	24.8936	41.4332	42.5377
CELE_C32D5.4	C32D5.4	0.829382	0.0148181	19.6051	13.7911	22.6239	13.7607	22.9255	30.3052	33.9965	36.157
CELE_ZK507.3	ZK507.3	0.861904	0.0148706	13.7236	17.4687	8.85282	21.0997	26.2006	23.8113	25.4973	36.157
CELE_F49E12.4	ubc-24	1.68969	0.0148905	1.96051	2.75822	8.85282	0.91738	10.9169	15.1526	11.6863	8.50754
CELE_Y38H6C.15	Y38H6C.15	1.16235	0.0149009	11.7631	7.35525	8.85282	13.7607	22.9255	18.3996	31.8717	20.2054
CELE_F58E6.7	hrg-3	1.08231	0.0149831	5.88154	11.0329	5.90188	11.0086	19.6504	24.8936	14.8735	12.7613
CELE_Y53G8AM.5	nspg-7.2	0.972882	0.015002	22.5459	42.2927	21.6402	35.7778	81.8769	83.3394	45.6828	29.7764
CELE_F45G2.5	bli-5	0.943025	0.0150161	8.82232	14.7105	19.6729	16.5128	26.2006	21.6466	32.9341	34.0302
CELE_F22E5.1	F22E5.1	0.833411	0.0151137	24.5064	20.2269	31.4767	23.8519	26.2006	38.9639	69.0553	43.6011
CELE_M110.7	M110.7	0.766033	0.0151946	16.6644	21.1463	15.7383	14.6781	31.6591	34.6346	25.4973	24.4592
CELE_Y71G12B.3	Y71G12B.3	0.938234	0.0153304	21.5657	9.19406	10.8201	9.1738	22.9255	25.9759	23.3726	24.4592
CELE_Y22D7AL.11	Y22D7AL.11	1.0181	0.0154291	30.388	22.9852	39.3458	8.25642	37.1175	41.1286	60.5562	64.87
CELE_C47A4.3	C47A4.3	0.690269	0.0157215	26.467	22.0658	29.5094	15.5955	33.8424	42.2109	35.0589	39.3474
CELE_F35G8.2	ttr-38	0.964477	0.0157546	16.6644	8.27466	16.722	8.25642	21.8338	31.3876	21.2478	22.3323
CELE_Y82E9BL.11	fbxa-15	1.23893	0.0157947	5.88154	8.27466	3.93458	6.42166	16.3754	19.4819	9.56151	12.7613
CELE_C55C2.2	ssp-19	0.586239	0.0158249	45.0918	26.6628	37.3786	33.0257	49.1261	56.2812	61.6186	45.728
CELE_F30H5.2	nlp-32	2.40333	0.0158776	0	1.83881	0	5.50428	4.36677	4.32932	15.9358	14.8882
CELE_F36H12.10	F36H12.10	0.957642	0.0159947	12.7433	8.27466	10.8201	11.9259	19.6504	18.3996	30.8093	15.9516
CELE_C09G9.7	npax-4	0.678916	0.0161069	28.4275	22.9852	21.6402	21.0997	39.3009	43.2932	36.1212	31.9033
CELE_Y65B4A.4	Y65B4A.4	1.18845	0.0161447	17.6446	4.59703	8.85282	11.0086	19.6504	25.9759	25.4973	24.4592
CELE_T13F2.12	ssp-36	1.61072	0.0165213	4.90129	2.75822	4.91823	0.91738	8.73353	6.49398	11.6863	13.8248
CELE_T21E12.5	T21E12.5	2.12528	0.0166584	1.96051	1.83881	0.983646	1.83476	4.36677	5.41165	10.6239	8.50754
CELE_K05B2.4	K05B2.4	0.666208	0.0166952	55.8747	131.475	68.8552	119.259	151.745	174.255	133.861	137.184
CELE_T19C3.9	ttr-7	0.625513	0.0167697	61.7562	102.974	50.166	104.581	105.894	123.386	144.485	120.169
CELE_B0244.17	B0244.17	0.843764	0.0169405	11.7631	13.7911	15.7383	20.1824	17.4671	27.0583	29.7469	36.157
CELE_ZK1307.3	ZK1307.3	0.907495	0.0170763	18.6249	10.1135	11.8038	10.0912	21.8338	27.0583	24.435	21.2689
CELE_Y66D12A.11	Y66D12A.11	0.689393	0.0173036	35.2893	22.0658	28.5257	27.5214	32.7507	43.2932	50.9947	55.299
CELE_F36A2.11	F36A2.11	0.830117	0.0173661	21.5657	13.7911	17.7056	10.0912	27.2923	22.7289	31.8717	29.7764
CELE_C33A12.15	ttr-9	1.39935	0.017423	5.88154	4.59703	3.93458	2.75214	9.82522	11.9056	12.7487	10.6344
CELE_F09C12.8	F09C12.8	0.619489	0.0174461	30.388	35.8569	49.1823	33.0257	53.4929	54.1165	55.2443	64.87
CELE_C10A4.9	C10A4.9	0.857232	0.0175566	19.6051	18.3881	14.7547	16.5128	22.9255	19.4819	40.3708	42.5377
CELE_K11C4.1	K11C4.1	0.664893	0.0175878	27.4472	31.2598	43.2804	27.5214	40.3926	41.1286	66.9305	56.3625
CELE_F28A10.12	F28A10.12	1.24391	0.0176296	4.90129	6.43585	12.7874	4.5869	17.4671	12.988	15.9358	21.2689
CELE_K07A3.3	K07A3.3	0.66376	0.0178047	35.2893	22.9852	39.3458	46.7864	44.7593	53.0342	70.1177	60.6162
CELE_F56D6.22	F56D6.22	1.30161	0.0181224	6.8618	6.43585	14.7547	1.83476	19.6504	17.3173	21.2478	14.8882
CELE_H20J04.1	H20J04.1	0.978123	0.0182687	13.7236	11.0329	19.6729	5.50428	18.5588	27.0583	23.3726	28.7129
CELE_ZK637.12	ZK637.12	0.706171	0.0186507	43.1313	30.3404	35.4113	38.53	40.3926	55.1988	83.9288	60.6162
CELE_F26G1.8	msp-42	1.10323	0.0188281	10.7828	5.51644	4.91823	7.33904	12.0086	15.1526	12.7487	21.2689
CELE_B0207.7	B0207.7	0.937296	0.0192046	14.7039	10.1135	9.83646	11.9259	17.4671	18.3996	20.1854	32.9667
CELE_T27C10.8	T27C10.8	0.693149	0.0193308	30.388	24.824	31.4767	19.265	37.1175	41.1286	37.1836	55.299
CELE_Y116F11B.8	Y116F11B.8	1.10033	0.0195613	6.8618	6.43585	7.86917	6.42166	9.82522	14.0703	18.0606	17.0151
CELE_C53D6.10	C53D6.10	0.838283	0.0196475	34.309	22.0658	38.3622	15.5955	38.2092	54.1165	61.6186	42.5377
CELE_Y67A6A.1	Y67A6A.1	0.695103	0.0196878	27.4472	24.824	23.6075	21.0997	39.3009	32.4699	49.9323	35.0936
CELE_W01B6.5	W01B6.5	0.822821	0.0197054	13.7236	12.8717	14.7547	11.0086	21.8338	22.7289	21.2478	26.5861
CELE_ZK616.8	ZK616.8	1.03706	0.0197335	20.5854	7.35525	9.83646	5.50428	22.9255	24.8936	16.9982	23.3957
CELE_ZC250.5	ZC250.5	0.959892	0.0197432	18.6249	10.1135	9.83646	12.8433	17.4671	25.9759	37.1836	19.142
CELE_T04A8.13	T04A8.13	1.38321	0.0197521	5.88154	3.67763	6.88552	1.83476	7.64184	14.0703	13.8111	11.6979
CELE_F36H12.8	ttbk-2.1	0.657624	0.0198667	30.388	27.5822	30.493	17.4302	36.0258	45.4579	41.4332	43.6011
CELE_F35C5.2	sra-14	0.602368	0.020219	39.2103	32.1792	51.1496	23.8519	55.6763	49.7872	60.5562	55.299
CELE_F21C10.9	F21C10.9	1.47108	0.0202744	244.084	70.7943	289.192	66.9687	248.906	254.348	687.366	668.905
CELE_F41H10.8	elo-6	0.934625	0.0203742	4195.5	1390.14	4311.32	1409.1	5178.98	5032.84	5897.32	5500.12
CELE_K09F6.5	K09F6.5	0.975784	0.0204901	11.7631	15.6299	9.83646	6.42166	16.3754	16.235	29.7469	23.3957
CELE_C31H1.1	C31H1.1	0.706707	0.0205286	31.3682	21.1463	28.5257	19.265	29.4757	36.7992	52.0571	44.6646
CELE_Y53F4B.19	Y53F4B.19	0.586199	0.0205702	36.2695	38.6151	42.2968	31.1909	48.0344	68.1868	42.4956	63.8066
CELE_Y75B8A.28	Y75B8A.28	1.02145	0.0205841	53.9142	23.9046	54.1005	26.604	44.7593	53.0342	103.052	120.169
CELE_ZK512.10	ZK512.10	1.03748	0.0206127	9.80257	7.35525	8.85282	10.0912	14.192	14.0703	26.5597	19.142
CELE_Y119D3A.4	fbxa-36	1.71601	0.0209231	0.980257	3.67763	2.95094	1.83476	6.55015	6.49398	9.56151	8.50754
CELE_T07E3.2	T07E3.2	1.03158	0.0209274	6.8618	7.35525	8.85282	6.42166	14.192	15.1526	11.6863	19.142
CELE_Y39G10AR.15	Y39G10AR.15	0.756887	0.0209595	30.388	15.6299	32.4603	24.7693	39.3009	32.4699	47.8075	54.2356
CELE_F27E5.3	F27E5.3	0.66957	0.0209595	26.467	22.9852	20.6566	16.5128	32.7507	29.2229	38.246	37.2205
CELE_F46F5.9	msrp-4	1.12586	0.0209973	4.90129	5.51644	11.8038	5.50428	19.6504	10.8233	15.9358	13.8248
CELE_ZK849.4	best-25	1.06781	0.0212703	12.7433	9.19406	8.85282	8.25642	18.5588	23.8113	10.6239	28.7129
CELE_F23B12.1	F23B12.1	0.861877	0.0213317	9.80257	18.3881	14.7547	11.9259	19.6504	28.1406	22.3102	29.7764
CELE_T12B5.14	T12B5.14	0.8843	0.0213454	29.4077	13.7911	24.5912	12.8433	31.6591	31.3876	38.246	46.7915
CELE_F14F7.4	F14F7.4	0.792846	0.0213707	23.5262	16.5493	30.493	12.8433	28.384	27.0583	45.6828	42.5377
CELE_F13H8.12	F13H8.12	1.08302	0.0216075	9.80257	8.27466	6.88552	4.5869	18.5588	20.5643	13.8111	9.57098
CELE_T21G5.1	T21G5.1	0.683133	0.0216359	29.4077	20.2269	33.444	25.6866	48.0344	42.2109	42.4956	41.4743
CELE_T05C12.3	decr-1.3	0.853309	0.021752	17.6446	13.7911	27.5421	11.0086	29.4757	40.0462	35.0589	21.2689
CELE_F10G2.7	F10G2.7	2.18003	0.0217817	1.96051	1.83881	0.983646	0.91738	7.64184	6.49398	8.49912	3.19033
CELE_K08D8.1	K08D8.1	1.05283	0.0217817	7.84206	15.6299	10.8201	4.5869	24.0172	22.7289	18.0606	15.9516
CELE_Y82E9BL.18	Y82E9BL.18	1.11381	0.0218165	9.80257	6.43585	10.8201	7.33904	21.8338	14.0703	25.4973	12.7613
CELE_Y62H9A.4	Y62H9A.4	0.635836	0.0218556	1783.09	845.854	1712.53	771.517	2061.11	1966.59	1976.04	1939.72
CELE_Y49F6B.8	Y49F6B.8	0.706593	0.0218698	22.5459	26.6628	30.493	21.0997	27.2923	50.8695	37.1836	48.9184
CELE_Y49F6B.12	Y49F6B.12	1.79857	0.0219634	4.90129	1.83881	2.95094	1.83476	8.73353	15.1526	3.18717	12.7613
CELE_F46F5.11	F46F5.11	1.36583	0.0219962	3.92103	2.75822	7.86917	5.50428	7.64184	10.8233	13.8111	19.142
CELE_F31F4.7	ugt-42	1.8121	0.0220412	1.96051	1.83881	1.96729	3.66952	3.27507	10.8233	10.6239	8.50754
CELE_F58A6.5	F58A6.5	0.64345	0.0223126	23.5262	20.2269	31.4767	22.0171	37.1175	30.3052	41.4332	42.5377
CELE_F10D11.4	F10D11.4	1.31603	0.0223129	6.8618	3.67763	5.90188	1.83476	8.73353	7.57631	16.9982	11.6979
CELE_F27E5.7	F27E5.7	0.678203	0.0223188	29.4077	27.5822	21.6402	39.4473	52.4012	57.3635	40.3708	39.3474
CELE_K07E3.9	K07E3.9	1.02149	0.022556	17.6446	8.27466	9.83646	11.9259	20.7421	15.1526	29.7469	30.8398
CELE_H02I12.6	his-66	1.1525	0.0226405	11.7631	5.51644	7.86917	4.5869	26.2006	14.0703	11.6863	13.8248
CELE_D2062.1	D2062.1	0.895367	0.0226561	15.6841	11.9523	10.8201	10.0912	15.2837	17.3173	31.8717	25.5226
CELE_F37C12.18	F37C12.18	0.672088	0.0227064	22.5459	30.3404	23.6075	23.8519	36.0258	43.2932	50.9947	29.7764
CELE_Y57A10B.7	Y57A10B.7	0.813085	0.0227697	15.6841	9.19406	19.6729	15.5955	26.2006	22.7289	33.9965	22.3323
CELE_ZK783.6	ZK783.6	0.890052	0.0227848	12.7433	11.9523	16.722	9.1738	20.7421	19.4819	27.6221	25.5226
CELE_T25B9.5	T25B9.5	0.979203	0.022803	13.7236	8.27466	7.86917	7.33904	20.7421	16.235	20.1854	15.9516
CELE_T06C10.3	T06C10.3	0.656893	0.0233877	28.4275	19.3075	32.4603	25.6866	39.3009	33.5522	49.9323	43.6011
CELE_T27B7.4	nhr-115	0.643892	0.0235471	26.467	42.2927	26.5584	24.7693	44.7593	41.1286	56.3066	45.728
CELE_C04A11.5	C04A11.5	0.649303	0.0236266	23.5262	24.824	29.5094	15.5955	32.7507	37.8816	36.1212	39.3474
CELE_C49C3.2	C49C3.2	0.868242	0.0236748	11.7631	13.7911	10.8201	14.6781	21.8338	15.1526	23.3726	32.9667
CELE_C49G9.2	C49G9.2	0.997979	0.0237115	9.80257	17.4687	12.7874	11.0086	32.7507	20.5643	37.1836	11.6979
CELE_C07D8.2	C07D8.2	1.96656	0.0237615	0.980257	2.75822	0	2.75214	8.73353	6.49398	7.43673	3.19033
CELE_W01B6.6	W01B6.6	0.737025	0.0239342	19.6051	18.3881	12.7874	15.5955	26.2006	29.2229	31.8717	23.3957
CELE_Y51H7C.9	Y51H7C.9	0.715062	0.0242756	31.3682	28.5016	44.2641	21.0997	36.0258	50.8695	72.2425	45.728
CELE_C26B2.2	C26B2.2	0.769214	0.024305	16.6644	14.7105	16.722	10.0912	21.8338	21.6466	28.6845	26.5861
CELE_R07C3.4	acs-15	0.67939	0.0243299	25.4867	21.1463	28.5257	22.9345	25.1089	47.6225	46.7451	37.2205
CELE_F14H12.8	F14H12.8	0.707871	0.0245083	15.6841	27.5822	15.7383	22.9345	41.4843	32.4699	31.8717	28.7129
CELE_D1081.11	D1081.11	1.59673	0.0246668	1.96051	3.67763	1.96729	3.66952	6.55015	6.49398	7.43673	13.8248
CELE_M176.9	M176.9	0.737926	0.0247205	27.4472	20.2269	28.5257	15.5955	33.8424	35.7169	28.6845	54.2356
CELE_Y37A1B.5	semo-1	0.755814	0.0247306	846.942	372.36	870.527	330.257	830.777	822.571	1207.94	1224.02
CELE_ZK418.13	ZK418.13	0.667658	0.024769	18.6249	37.6957	23.6075	38.53	41.4843	41.1286	52.0571	54.2356
CELE_B0244.6	B0244.6	0.61593	0.0248906	20.5854	22.9852	25.5748	30.2735	40.3926	31.3876	40.3708	40.4108
CELE_T15B7.3	col-143	1.46971	0.0250668	10847.5	1734	10737.5	1865.95	17696.3	16754.5	18005.4	17296.9
CELE_M04G7.2	M04G7.2	1.00115	0.0250701	11.7631	9.19406	5.90188	10.0912	12.0086	15.1526	24.435	22.3323
CELE_Y75B8A.23	Y75B8A.23	0.762991	0.0251803	18.6249	14.7105	16.722	14.6781	31.6591	22.7289	21.2478	34.0302
CELE_F22G12.8	F22G12.8	0.726764	0.0251803	32.3485	24.824	44.2641	21.0997	42.576	66.0221	39.3084	54.2356
CELE_W03D8.5	W03D8.5	0.813328	0.0252438	15.6841	11.0329	14.7547	20.1824	15.2837	25.9759	32.9341	34.0302
CELE_F15A4.9	arrd-9	0.967618	0.0254644	14.7039	7.35525	8.85282	8.25642	20.7421	14.0703	24.435	17.0151
CELE_F13H8.3	F13H8.3	0.759532	0.0255134	352.893	150.783	413.131	144.029	475.977	459.99	419.644	439.202
CELE_T13B5.9	T13B5.9	0.586594	0.0255675	54.8944	30.3404	50.166	32.1083	70.9599	67.1045	48.8699	63.8066
CELE_K08D8.3	K08D8.3	1.22791	0.0256966	105.868	40.4539	114.103	40.3647	76.4184	73.5985	291.095	262.67
CELE_F52H2.15	F52H2.15	1.54355	0.0258305	1.96051	3.67763	3.93458	3.66952	6.55015	14.0703	12.7487	5.31721
CELE_ZK1053.6	ZK1053.6	1.08431	0.025875	11.7631	3.67763	11.8038	5.50428	19.6504	18.3996	11.6863	19.142
CELE_K06A4.1	nas-3	1.56584	0.0259083	24.5064	2.75822	21.6402	7.33904	27.2923	19.4819	66.9305	52.1087
CELE_M01H9.5	M01H9.5	1.52724	0.0259109	1.96051	2.75822	2.95094	2.75214	5.45846	8.65864	8.49912	7.4441
CELE_F35E2.5	F35E2.5	0.846851	0.0259487	10.7828	10.1135	20.6566	16.5128	25.1089	28.1406	28.6845	22.3323
CELE_Y41D4B.17	Y41D4B.17	0.672037	0.0260357	56.8549	119.523	66.8879	128.433	162.662	190.49	124.3	115.915
CELE_ZK1098.12	ZK1098.12	1.18026	0.0263966	3.92103	7.35525	4.91823	5.50428	9.82522	8.65864	12.7487	18.0785
CELE_F23G4.1	F23G4.1	0.900704	0.0265977	20.5854	13.7911	17.7056	22.9345	48.0344	38.9639	25.4973	27.6495
CELE_C24D10.7	nspd-3	0.603122	0.0266647	49.9931	32.1792	42.2968	24.7693	70.9599	50.8695	53.1195	51.0452
CELE_Y37D8A.5	Y37D8A.5	0.614196	0.0268075	39.2103	20.2269	27.5421	25.6866	38.2092	40.0462	50.9947	42.5377
CELE_Y46H3D.1	Y46H3D.1	1.21104	0.026848	7.84206	3.67763	3.93458	4.5869	8.73353	15.1526	10.6239	11.6979
CELE_C33H5.16	C33H5.16	0.874028	0.027048	16.6644	9.19406	15.7383	11.9259	15.2837	28.1406	30.8093	23.3957
CELE_ZK1025.9	nhr-113	1.82094	0.0271269	1.96051	1.83881	1.96729	1.83476	5.45846	4.32932	6.37434	10.6344
CELE_F22B3.2	his-63	0.718894	0.0273501	33.3288	14.7105	25.5748	24.7693	49.1261	47.6225	33.9965	30.8398
CELE_C49A1.3	best-11	0.9551	0.0276738	9.80257	9.19406	9.83646	11.0086	14.192	14.0703	26.5597	22.3323
CELE_T10E9.6	T10E9.6	1.62527	0.0277377	1.96051	4.59703	5.90188	1.83476	13.1003	2.16466	11.6863	17.0151
CELE_F46F5.19	F46F5.19	2.75928	0.0278542	1.96051	0.919406	0	0	5.45846	2.16466	9.56151	2.12689
CELE_F58G6.3	F58G6.3	0.959476	0.0278754	56.8549	25.7434	61.9697	26.604	62.2264	51.9519	114.738	103.154
CELE_Y18H1A.1	ptp-5.3	0.663114	0.0282746	38.23	31.2598	18.6893	33.0257	36.0258	42.2109	52.0571	61.6797
CELE_F18E2.1	papl-1	0.713574	0.0284186	968.494	407.297	904.954	373.374	920.296	875.605	1267.43	1287.83
CELE_Y37E11AR.7	Y37E11AR.7	1.40737	0.028507	2.94077	3.67763	7.86917	1.83476	13.1003	5.41165	9.56151	14.8882
CELE_ZK484.6	ZK484.6	0.714684	0.0289878	18.6249	13.7911	21.6402	15.5955	31.6591	22.7289	30.8093	28.7129
CELE_W03D8.3	W03D8.3	0.806098	0.0291042	16.6644	13.7911	19.6729	7.33904	27.2923	18.3996	27.6221	26.5861
CELE_C18A3.7	C18A3.7	1.04857	0.0291715	16.6644	11.0329	9.83646	3.66952	18.5588	18.3996	30.8093	17.0151
CELE_C29E6.3	pph-2	0.95707	0.029399	10.7828	9.19406	13.771	19.265	24.0172	16.235	26.5597	36.157
CELE_C25H3.16	C25H3.16	1.6377	0.029408	0.980257	4.59703	3.93458	1.83476	8.73353	2.16466	14.8735	9.57098
CELE_Y18H1A.10	hasp-2	0.780898	0.0294085	14.7039	23.9046	20.6566	15.5955	18.5588	29.2229	42.4956	38.2839
CELE_F28F8.1	acr-18	0.65466	0.0296035	30.388	24.824	37.3786	18.3476	41.4843	34.6346	54.1819	43.6011
CELE_Y51B9A.6	Y51B9A.6	1.24959	0.0300865	7.84206	10.1135	2.95094	9.1738	15.2837	8.65864	22.3102	25.5226
CELE_ZK218.5	ZK218.5	1.55933	0.0303864	4.90129	4.59703	5.90188	4.5869	8.73353	3.24699	25.4973	21.2689
CELE_F48B9.3	F48B9.3	0.762774	0.0304882	16.6644	13.7911	13.771	11.0086	24.0172	21.6466	24.435	23.3957
CELE_F56D6.13	F56D6.13	0.742031	0.0305329	18.6249	14.7105	16.722	17.4302	20.7421	30.3052	39.3084	22.3323
CELE_H12D21.5	H12D21.5	1.04701	0.0305611	7.84206	4.59703	8.85282	6.42166	17.4671	12.988	15.9358	10.6344
CELE_F26F12.5	F26F12.5	0.681804	0.0306268	19.6051	22.9852	20.6566	16.5128	40.3926	20.5643	30.8093	36.157
CELE_B0207.1	B0207.1	0.775334	0.0307684	20.5854	10.1135	15.7383	20.1824	26.2006	23.8113	35.0589	28.7129
CELE_ZK507.1	ZK507.1	0.891869	0.0309132	5.88154	11.0329	18.6893	11.9259	25.1089	15.1526	19.123	28.7129
CELE_F10F2.7	clec-151	0.590858	0.0309953	41.1708	40.4539	76.7244	40.3647	58.9513	83.3394	64.8058	91.4561
CELE_T06C10.6	kin-26	0.890013	0.0311348	16.6644	9.19406	14.7547	5.50428	17.4671	19.4819	24.435	23.3957
CELE_F34H10.5	F34H10.5	1.46308	0.0312177	2.94077	2.75822	2.95094	4.5869	12.0086	9.74097	6.37434	8.50754
CELE_B0511.4	tag-344	0.828675	0.0312496	21.5657	15.6299	13.771	9.1738	27.2923	32.4699	16.9982	29.7764
CELE_ZK892.3	ZK892.3	0.727968	0.0315133	18.6249	11.9523	20.6566	18.3476	29.4757	21.6466	32.9341	30.8398
CELE_C09G9.4	hdl-2	0.679579	0.0317823	28.4275	34.9374	19.6729	17.4302	30.5674	35.7169	39.3084	55.299
CELE_C31H2.14	C31H2.14	0.718868	0.0319407	38.23	17.4687	19.6729	24.7693	32.7507	55.1988	35.0589	41.4743
CELE_E04D5.4	E04D5.4	0.809817	0.031948	16.6644	23.9046	15.7383	30.2735	26.2006	29.2229	50.9947	45.728
CELE_F59A1.15	F59A1.15	0.717176	0.0320278	16.6644	16.5493	16.722	11.0086	25.1089	24.8936	21.2478	28.7129
CELE_F44D12.6	F44D12.6	0.811427	0.0322017	20.5854	14.7105	15.7383	9.1738	24.0172	22.7289	36.1212	22.3323
CELE_C48E7.7	C48E7.7	0.633044	0.0324634	22.5459	26.6628	31.4767	16.5128	27.2923	43.2932	37.1836	42.5377
CELE_R05D8.9	R05D8.9	1.2049	0.0324874	9.80257	3.67763	3.93458	4.5869	10.9169	9.74097	13.8111	15.9516
CELE_R13G10.4	cnnm-5	0.808444	0.0326472	8.82232	15.6299	12.7874	14.6781	17.4671	16.235	25.4973	31.9033
CELE_F22E5.21	F22E5.21	1.40567	0.032677	0	3.67763	4.91823	5.50428	7.64184	10.8233	11.6863	7.4441
CELE_F12A10.4	nep-5	1.14812	0.0328462	5.88154	6.43585	7.86917	4.5869	10.9169	12.988	14.8735	15.9516
CELE_Y116A8B.4	Y116A8B.4	0.970354	0.0332307	8.82232	7.35525	8.85282	10.0912	19.6504	16.235	23.3726	9.57098
CELE_F08A8.2	acox-1.2	0.816259	0.0332307	379.36	148.024	411.164	132.103	390.826	470.814	496.136	526.404
CELE_C03D6.1	C03D6.1	0.637806	0.03335	80.3811	110.329	73.7735	85.3163	187.771	177.502	103.052	76.5679
CELE_F56D6.14	F56D6.14	1.61988	0.0340492	3.92103	3.67763	2.95094	0	6.55015	5.41165	10.6239	9.57098
CELE_K06A4.8	K06A4.8	0.984773	0.0340492	2.94077	8.27466	9.83646	11.9259	17.4671	15.1526	13.8111	19.142
CELE_Y70C5C.6	nhr-112	0.594179	0.0342276	19.6051	35.8569	27.5421	37.6126	44.7593	51.9519	43.558	42.5377
CELE_T01C3.5	irld-14	0.766899	0.0342429	16.6644	14.7105	23.6075	14.6781	26.2006	31.3876	36.1212	24.4592
CELE_Y52B11B.1	Y52B11B.1	2.08222	0.0347732	0.980257	1.83881	0	3.66952	4.36677	6.49398	5.31195	11.6979
CELE_F35H8.4	F35H8.4	0.814899	0.0349887	17.6446	6.43585	16.722	15.5955	21.8338	21.6466	27.6221	27.6495
CELE_C15H11.13	C15H11.13	1.65514	0.0351165	1.96051	3.67763	0.983646	1.83476	4.36677	6.49398	8.49912	7.4441
CELE_R11G11.6	srlf-19	1.72239	0.0351933	0	2.75822	1.96729	4.5869	5.45846	6.49398	10.6239	8.50754
CELE_C25D7.4	fbxa-82	0.786745	0.0352113	12.7433	22.0658	15.7383	9.1738	25.1089	18.3996	30.8093	28.7129
CELE_C25G4.1	clec-185	1.01434	0.0354059	9.80257	7.35525	8.85282	5.50428	16.3754	15.1526	19.123	12.7613
CELE_Y69E1A.3	Y69E1A.3	0.843849	0.0356682	9.80257	11.0329	13.771	9.1738	19.6504	16.235	23.3726	19.142
CELE_Y69A2AR.25	Y69A2AR.25	1.15796	0.0357821	4.90129	8.27466	9.83646	6.42166	18.5588	21.6466	6.37434	19.142
CELE_ZC302.3	ZC302.3	0.817453	0.0360711	11.7631	7.35525	15.7383	12.8433	19.6504	16.235	25.4973	22.3323
CELE_T15B7.1	T15B7.1	0.843568	0.0361598	1204.74	423.846	1192.18	417.408	1070.95	1092.07	1920.8	1725.97
CELE_H23N18.4	ugt-67	0.692892	0.03629	14.7039	19.3075	24.5912	14.6781	29.4757	33.5522	25.4973	29.7764
CELE_F43D2.3	F43D2.3	0.989804	0.0368291	11.7631	8.27466	6.88552	4.5869	15.2837	15.1526	14.8735	17.0151
CELE_K08H2.7	K08H2.7	0.9608	0.0368933	6.8618	7.35525	7.86917	8.25642	15.2837	11.9056	18.0606	13.8248
CELE_R13A1.3	R13A1.3	0.840368	0.0370601	11.7631	8.27466	13.771	11.9259	21.8338	18.3996	21.2478	20.2054
CELE_M162.7	M162.7	0.62733	0.0371869	29.4077	26.6628	26.5584	18.3476	29.4757	34.6346	53.1195	38.2839
CELE_F28A10.7	F28A10.7	1.75984	0.0374569	3.92103	0.919406	1.96729	0.91738	7.64184	8.65864	5.31195	4.25377
CELE_F57B1.9	F57B1.9	0.877336	0.0374887	21.5657	10.1135	26.5584	22.0171	28.384	36.7992	37.1836	44.6646
CELE_R01E6.5	R01E6.5	1.34531	0.03756	2.94077	3.67763	5.90188	2.75214	7.64184	8.65864	13.8111	8.50754
CELE_T16G12.7	T16G12.7	0.857401	0.0376842	22.5459	18.3881	16.722	8.25642	21.8338	23.8113	47.8075	25.5226
CELE_Y71F9B.15	Y71F9B.15	1.01143	0.0376903	7.84206	5.51644	12.7874	5.50428	16.3754	12.988	20.1854	13.8248
CELE_Y69F12A.1	Y69F12A.1	0.880759	0.0379204	10.7828	9.19406	14.7547	9.1738	15.2837	22.7289	12.7487	29.7764
CELE_Y19D10A.9	clec-209	2.35099	0.0379592	925.363	605.889	795.77	576.115	4628.77	4284.95	2765.4	3131.84
CELE_F42A9.3	F42A9.3	1.06764	0.0380436	7.84206	6.43585	7.86917	4.5869	13.1003	7.57631	19.123	15.9516
CELE_Y23H5A.4	spe-47	0.671891	0.0381101	24.5064	14.7105	14.7547	18.3476	31.6591	27.0583	27.6221	28.7129
CELE_Y119C1B.1	Y119C1B.1	0.700084	0.0381441	40.1906	18.3881	20.6566	20.1824	34.9341	29.2229	42.4956	54.2356
CELE_K08B4.7	K08B4.7	0.806666	0.0381817	18.6249	24.824	30.493	9.1738	32.7507	33.5522	29.7469	48.9184
CELE_F59C6.3	F59C6.3	1.02191	0.0383241	8.82232	7.35525	8.85282	3.66952	9.82522	14.0703	16.9982	17.0151
CELE_F36A4.4	F36A4.4	0.738051	0.0383558	26.467	14.7105	23.6075	24.7693	29.4757	25.9759	57.369	36.157
CELE_ZK622.1	ZK622.1	0.682521	0.0388431	17.6446	25.7434	19.6729	21.0997	31.6591	28.1406	37.1836	38.2839
CELE_F49F1.12	F49F1.12	1.08095	0.0396783	10.7828	4.59703	4.91823	2.75214	12.0086	10.8233	13.8111	11.6979
CELE_F40B5.3	nep-15	1.43033	0.0398058	0	4.59703	4.91823	5.50428	5.45846	8.65864	15.9358	10.6344
CELE_ZK666.10	sri-8	1.06055	0.0398614	5.88154	4.59703	8.85282	5.50428	7.64184	18.3996	11.6863	13.8248
CELE_K07E12.2	K07E12.2	1.14341	0.0402232	7.84206	2.75822	4.91823	5.50428	14.192	8.65864	12.7487	10.6344
CELE_F18E3.11	F18E3.11	1.28145	0.0404321	93.1245	25.7434	97.381	26.604	55.6763	79.0101	229.476	225.45
CELE_R07C3.1	clec-43	0.90795	0.0404782	32.3485	17.4687	29.5094	10.0912	29.4757	24.8936	58.4314	54.2356
CELE_W03A5.1	W03A5.1	0.616867	0.0408706	32.3485	22.9852	24.5912	21.0997	30.5674	30.3052	47.8075	45.728
CELE_ZK354.6	ZK354.6	0.656491	0.0409451	35.2893	20.2269	34.4276	22.9345	55.6763	25.9759	52.0571	43.6011
CELE_F37C4.8	F37C4.8	1.22636	0.0416938	1.96051	5.51644	3.93458	3.66952	9.82522	8.65864	10.6239	6.38066
CELE_F35F11.2	F35F11.2	0.845467	0.0425692	10.7828	11.9523	7.86917	8.25642	16.3754	22.7289	11.6863	19.142
CELE_C34B2.4	C34B2.4	1.26227	0.0426077	2.94077	5.51644	4.91823	2.75214	12.0086	6.49398	5.31195	14.8882
CELE_F36H12.14	F36H12.14	0.958887	0.0427049	8.82232	8.27466	13.771	7.33904	14.192	9.74097	23.3726	26.5861
CELE_W06H8.2	W06H8.2	0.873222	0.0429445	16.6644	11.9523	11.8038	5.50428	14.192	21.6466	20.1854	27.6495
CELE_K02A11.2	K02A11.2	1.14141	0.0431564	4.90129	4.59703	3.93458	4.5869	9.82522	10.8233	9.56151	9.57098
CELE_T16G1.13	T16G1.13	0.999792	0.0434064	8.82232	5.51644	10.8201	4.5869	14.192	10.8233	18.0606	15.9516
CELE_T25D10.5	btb-2	0.734761	0.0435425	13.7236	11.0329	16.722	11.0086	18.5588	20.5643	24.435	23.3957
CELE_K09C8.3	nas-10	1.42279	0.0440551	1.96051	5.51644	5.90188	10.0912	12.0086	6.49398	26.5597	18.0785
CELE_Y45F10B.2	Y45F10B.2	2.06534	0.0441796	0	0.919406	0.983646	3.66952	9.82522	2.16466	6.37434	5.31721
CELE_ZK617.3	spe-17	0.856652	0.0444263	9.80257	11.0329	9.83646	7.33904	16.3754	16.235	11.6863	24.4592
CELE_ZK228.4	ZK228.4	0.820666	0.0448027	150.96	57.0032	151.482	64.2166	128.82	113.645	262.41	242.465
CELE_ZK354.7	ZK354.7	0.740745	0.0448267	15.6841	13.7911	15.7383	16.5128	19.6504	27.0583	21.2478	35.0936
CELE_Y47D3B.12	Y47D3B.12	0.600371	0.0448595	35.2893	23.9046	33.444	21.0997	33.8424	44.3755	50.9947	42.5377
CELE_C47E8.1	C47E8.1	1.04661	0.0451076	4.90129	5.51644	10.8201	6.42166	16.3754	10.8233	12.7487	17.0151
CELE_E02H4.2	E02H4.2	0.664438	0.0451686	17.6446	17.4687	18.6893	12.8433	36.0258	22.7289	22.3102	24.4592
CELE_F36A4.2	F36A4.2	0.7614	0.045443	12.7433	11.9523	16.722	11.9259	16.3754	23.8113	20.1854	29.7764
CELE_R03D7.8	R03D7.8	0.663437	0.0455182	19.6051	14.7105	17.7056	19.265	21.8338	31.3876	29.7469	29.7764
CELE_T05G5.6	ech-6	0.737742	0.045529	6205.03	2447.46	6222.55	2466.83	5197.54	5158.39	9325.66	9236
CELE_D2089.2	45353	0.837083	0.0456614	14.7039	11.9523	7.86917	14.6781	19.6504	17.3173	33.9965	17.0151
CELE_Y59E9AL.5	Y59E9AL.5	1.45005	0.0457455	3.92103	0.919406	1.96729	4.5869	4.36677	7.57631	11.6863	7.4441
CELE_C17C3.4	ins-11	1.48057	0.0464021	0	4.59703	2.95094	2.75214	7.64184	7.57631	5.31195	8.50754
CELE_D2092.7	tsp-19	0.925956	0.0464497	6.8618	7.35525	6.88552	8.25642	13.1003	11.9056	14.8735	15.9516
CELE_M05D6.1	M05D6.1	1.34511	0.0465438	11.7631	3.67763	0.983646	6.42166	13.1003	10.8233	18.0606	15.9516
CELE_B0524.5	B0524.5	1.25667	0.0469249	8.82232	1.83881	2.95094	2.75214	13.1003	8.65864	8.49912	8.50754
CELE_Y54E2A.5	Y54E2A.5	0.75884	0.0469564	14.7039	9.19406	19.6729	13.7607	18.5588	21.6466	28.6845	27.6495
CELE_ZC190.7	ZC190.7	1.05141	0.0470783	7.84206	4.59703	8.85282	2.75214	9.82522	9.74097	18.0606	11.6979
CELE_C50B6.8	nhr-168	0.648393	0.0476308	132.335	147.105	154.432	145.863	327.507	298.723	144.485	138.248
CELE_C27F2.6	C27F2.6	2.17892	0.0477413	0	0.919406	1.96729	0.91738	4.36677	4.32932	6.37434	2.12689
CELE_B0244.9	B0244.9	0.680396	0.0481198	24.5064	16.5493	26.5584	22.9345	26.2006	25.9759	42.4956	49.9818
CELE_F37A8.1	F37A8.1	0.914875	0.0483329	11.7631	6.43585	8.85282	12.8433	15.2837	18.3996	13.8111	27.6495
CELE_C46H11.6	C46H11.6	0.89475	0.0486471	12.7433	6.43585	8.85282	4.5869	16.3754	14.0703	15.9358	13.8248
CELE_Y46G5A.37	Y46G5A.37	2.40131	0.0495438	0	0.919406	0.983646	0.91738	3.27507	1.08233	4.24956	6.38066

## Sheet: Down
Locus ID	Symbol	log2FoldChange	padj	WT1	WT2	WT3	WT4	LT1	LT2	LT3	LT4
[truncated: 3,632 more rows]
